# Supplementary material for: De Novo Synthesis of α-Ketoamides via Pd/TBD Synergistic Catalysis
Source: Research Square preprint supplement (doi:10.21203/rs.3.rs-4272667/v1), 2024-04-19
Supplement: Supplementary file 3 [file a59129436289381183670639.pdf]

# ***De Novo* Synthesis of $\alpha$ -Ketoamides via Pd/TBD Synergistic Catalysis**

Jia-He Chen<sup>1</sup>, Li-Ren Zhang<sup>1</sup>, Zhang-Yang Wang<sup>1</sup>, Lu-Jie Liu<sup>1</sup>, Li-Ping Tu<sup>1</sup>,  
Yun Zhang<sup>1,2</sup>, Yong-Zheng Chen<sup>1,2</sup> & Wen-Yong Han<sup>1,2\*</sup>

<sup>1</sup> Key Laboratory of Biocatalysis & Chiral Drug Synthesis of Guizhou Province, Generic Drug Research Center of Guizhou Province, Green Pharmaceuticals Engineering Research Center of Guizhou Province, School of Pharmacy, Zunyi Medical University, Zunyi 563006, China

<sup>2</sup> Key Laboratory of Basic Pharmacology of Ministry of Education and Joint International Research Laboratory of Ethnomedicine of Ministry of Education, Zunyi Medical University, Zunyi 563006, China.

E-mail: hanwy@126.com, hanwy@zmu.edu.cn

# Supporting Information

## Table of Contents

|                                                                          |     |
|--------------------------------------------------------------------------|-----|
| 1. General information .....                                             | S1  |
| 2. Optimization of reaction conditions .....                             | S2  |
| 2.1 Synthesis of <b>3</b> from bromobenzene .....                        | S2  |
| 2.2 Synthesis of <b>3</b> from iodobenzene .....                         | S5  |
| 2.3 Synthesis of <b>3</b> from phenyl trifluoromethanesulfonate .....    | S9  |
| 3. Procedures for the preparation of substrates .....                    | S11 |
| 3.1 Preparation of <b>1a</b> .....                                       | S11 |
| 3.2 Preparation of <b>1b</b> .....                                       | S12 |
| 3.3 Preparation of <b>1c</b> .....                                       | S13 |
| 3.4 Preparation of <b>1d</b> .....                                       | S13 |
| 3.5 Preparation of <b>1e</b> .....                                       | S14 |
| 3.6 Preparation of <b>1f</b> .....                                       | S14 |
| 3.7 Preparation of <b>1g</b> .....                                       | S15 |
| 3.8 Preparation of <b>1h</b> .....                                       | S16 |
| 3.9 Preparation of isocyanides <b>2a</b> .....                           | S16 |
| 4. Representative procedure for the synthesis of <b>3</b> .....          | S18 |
| 5. Procedures for the synthesis of <b>59-69</b> and <b>76-81</b> .....   | S20 |
| 5.1 Synthesis of <b>59</b> from <b>3</b> .....                           | S20 |
| 5.2 Synthesis of <b>60</b> from <b>3</b> .....                           | S20 |
| 5.3 Synthesis of <b>61</b> from <b>3</b> .....                           | S20 |
| 5.4 Synthesis of <b>62</b> from <b>3</b> .....                           | S21 |
| 5.5 Synthesis of <b>63</b> , <b>64</b> and <b>65</b> from <b>3</b> ..... | S21 |
| 5.6 Synthesis of <b>66</b> and <b>67</b> from <b>3</b> .....             | S23 |
| 5.7 Synthesis of <b>68</b> and <b>69</b> from <b>3</b> .....             | S23 |
| 5.8 Synthesis of <b>76</b> from <b>3</b> .....                           | S24 |
| 5.9 Synthesis of <b>77</b> from <b>14</b> .....                          | S25 |
| 5.10 Synthesis of <b>78</b> from <b>78-1</b> .....                       | S26 |

|                                                                                              |      |
|----------------------------------------------------------------------------------------------|------|
| 5.11 Synthesis of <b>78</b> and <b>80</b> .....                                              | S28  |
| 5.12 Synthesis of <b>81</b> .....                                                            | S28  |
| 6. Characterization data of <b>3-81</b> .....                                                | S30  |
| 7. Gram-scale experiments .....                                                              | S60  |
| 8. Mechanistic studies.....                                                                  | S62  |
| 8.1 Control experiment .....                                                                 | S62  |
| 8.2 Isotope labeling experiment.....                                                         | S64  |
| 8.3 Control experiment with imidoypalladium complex .....                                    | S65  |
| 8.4 Control experiment with $\alpha$ -ketoimine amide.....                                   | S66  |
| 8.5 Hammett's correlation.....                                                               | S66  |
| 8.6 Kinetic Studies under standard reaction conditions .....                                 | S68  |
| 9. Single crystal X-ray diffraction.....                                                     | S76  |
| 9.1 Cultivation of single crystals .....                                                     | S76  |
| 9.2 Crystal measurement.....                                                                 | S76  |
| 9.3 X-ray crystallographic data of <b>6</b> , <b>79</b> and <b>81</b> .....                  | S77  |
| 10. Copies of $^1\text{H}$ -NMR, $^{13}\text{C}$ -NMR and $^{19}\text{F}$ -NMR spectra ..... | S80  |
| 11. References.....                                                                          | S239 |

## 1. General information

Unless otherwise noted, all commercially available reagents were used without further purification. All of the solvents were treated according to known methods. Column chromatography was performed on silica gel (300-400 mesh).  $^1\text{H}$ -NMR (400 MHz) chemical shifts were reported in ppm ( $\delta$ ) relative to tetramethylsilane (TMS) with the solvent resonance employed as the internal standard.  $^{13}\text{C}$ -NMR (101 MHz) chemical shifts were reported in ppm ( $\delta$ ) from tetramethylsilane (TMS) with the solvent resonance as the internal standard. Data were reported as follows: chemical shift, multiplicity (s = singlet, d = doublet, t = triplet, q = quartet, dd = doublet of doublets, td = triplet of doublets, m = multiplet, br s = broad single), coupling constants (Hz) and integration. HRMS measurements were obtained on a Orbitrap analyzer. High-resolution mass spectra were recorded on a Waters Xevo G2-XS QToF spectrometer and Thermo Q Exactive Focus. Melting points were uncorrected. X-ray crystallographic data were collected by a diffractometer Rigaku Oxford Diffraction Supernova Dual Source.



## 2. Optimization of reaction conditions

### 2.1 Synthesis of 3 from bromobenzene

**Table S1. Screening of ligands, Pd catalysts, solvents and base<sup>a</sup>**

| $  \begin{array}{c}  \text{Pd catalyst (10 mol\%)} \\  \text{Ligand (20 mol\%)} \\  \text{Base (1.0 equiv), H}_2\text{O (100 }\mu\text{L)} \\  \text{Solvent (1.0 mL), 90 }^\circ\text{C, Ar, 12 h} \\  \text{then} \\  \text{Silica Gel Column Chromatography}  \end{array}  $ |        |                                                                                                                                                         |         |                                 |                        |       |
|---------------------------------------------------------------------------------------------------------------------------------------------------------------------------------------------------------------------------------------------------------------------------------|--------|---------------------------------------------------------------------------------------------------------------------------------------------------------|---------|---------------------------------|------------------------|-------|
| 1                                                                                                                                                                                                                                                                               | 2      | $  \text{Ph-Br} + \text{C}\equiv\text{N-}^+\text{Bu}^- \xrightarrow{\text{then}} \text{Ph-C(=O)-NH-C(=O)-}^+\text{Bu}^- + \text{Ph-C(=O)-NH-C(=O)-H}  $ |         |                                 |                        |       |
| Entry                                                                                                                                                                                                                                                                           | Ligand | Pd catalyst                                                                                                                                             | Solvent | Base                            | Yield (%) <sup>b</sup> |       |
|                                                                                                                                                                                                                                                                                 |        |                                                                                                                                                         |         |                                 | 3                      | 4     |
| 1                                                                                                                                                                                                                                                                               | L1     | PdCl <sub>2</sub>                                                                                                                                       | DMSO    | Cs <sub>2</sub> CO <sub>3</sub> | 36                     | trace |
| 2                                                                                                                                                                                                                                                                               | L2     | PdCl <sub>2</sub>                                                                                                                                       | DMSO    | Cs <sub>2</sub> CO <sub>3</sub> | NR                     | —     |
| 3                                                                                                                                                                                                                                                                               | L3     | PdCl <sub>2</sub>                                                                                                                                       | DMSO    | Cs <sub>2</sub> CO <sub>3</sub> | NR                     | —     |
| 4                                                                                                                                                                                                                                                                               | L4     | PdCl <sub>2</sub>                                                                                                                                       | DMSO    | Cs <sub>2</sub> CO <sub>3</sub> | NR                     | —     |
| 5                                                                                                                                                                                                                                                                               | L5     | PdCl <sub>2</sub>                                                                                                                                       | DMSO    | Cs <sub>2</sub> CO <sub>3</sub> | NR                     | —     |
| 6                                                                                                                                                                                                                                                                               | L6     | PdCl <sub>2</sub>                                                                                                                                       | DMSO    | Cs <sub>2</sub> CO <sub>3</sub> | NR                     | —     |
| 7                                                                                                                                                                                                                                                                               | L7     | PdCl <sub>2</sub>                                                                                                                                       | DMSO    | Cs <sub>2</sub> CO <sub>3</sub> | 49                     | trace |
| 8 <sup>c</sup>                                                                                                                                                                                                                                                                  | L8     | PdCl <sub>2</sub>                                                                                                                                       | DMSO    | Cs <sub>2</sub> CO <sub>3</sub> | 0                      | 74    |
| 9                                                                                                                                                                                                                                                                               | L9     | PdCl <sub>2</sub>                                                                                                                                       | DMSO    | Cs <sub>2</sub> CO <sub>3</sub> | 24                     | trace |
| 10                                                                                                                                                                                                                                                                              | L10    | PdCl <sub>2</sub>                                                                                                                                       | DMSO    | Cs <sub>2</sub> CO <sub>3</sub> | 38                     | trace |
| 11                                                                                                                                                                                                                                                                              | L11    | PdCl <sub>2</sub>                                                                                                                                       | DMSO    | Cs <sub>2</sub> CO <sub>3</sub> | NR                     | —     |
| 12                                                                                                                                                                                                                                                                              | L12    | PdCl <sub>2</sub>                                                                                                                                       | DMSO    | Cs <sub>2</sub> CO <sub>3</sub> | 27                     | trace |
| 13                                                                                                                                                                                                                                                                              | L7     | Pd(OAc) <sub>2</sub>                                                                                                                                    | DMSO    | Cs <sub>2</sub> CO <sub>3</sub> | 32                     | trace |
| 14                                                                                                                                                                                                                                                                              | L7     | PdI <sub>2</sub>                                                                                                                                        | DMSO    | Cs <sub>2</sub> CO <sub>3</sub> | 40                     | —     |
| 15                                                                                                                                                                                                                                                                              | L7     | Pd(TFA) <sub>2</sub>                                                                                                                                    | DMSO    | Cs <sub>2</sub> CO <sub>3</sub> | 37                     | trace |
| 16                                                                                                                                                                                                                                                                              | L7     | PdCl <sub>2</sub> (dppb)                                                                                                                                | DMSO    | Cs <sub>2</sub> CO <sub>3</sub> | 32                     | —     |
| 17                                                                                                                                                                                                                                                                              | L7     | PdCl <sub>2</sub> (nbd)                                                                                                                                 | DMSO    | Cs <sub>2</sub> CO <sub>3</sub> | 34                     | —     |
| 18                                                                                                                                                                                                                                                                              | L7     | [(π-cinnamyl)PdCl] <sub>2</sub>                                                                                                                         | DMSO    | Cs <sub>2</sub> CO <sub>3</sub> | trace                  | —     |
| 19                                                                                                                                                                                                                                                                              | L7     | PdCl <sub>2</sub> (dipp)                                                                                                                                | DMSO    | Cs <sub>2</sub> CO <sub>3</sub> | 28                     | —     |
| 20                                                                                                                                                                                                                                                                              | L7     | Pd(OTf) <sub>2</sub> (dipp)                                                                                                                             | DMSO    | Cs <sub>2</sub> CO <sub>3</sub> | 35                     | —     |
| 21                                                                                                                                                                                                                                                                              | L7     | Pd-117                                                                                                                                                  | DMSO    | Cs <sub>2</sub> CO <sub>3</sub> | 41                     | —     |
| 22                                                                                                                                                                                                                                                                              | L7     | [Pd(allyl)Cl] <sub>2</sub>                                                                                                                              | DMSO    | Cs <sub>2</sub> CO <sub>3</sub> | trace                  | —     |
| 23                                                                                                                                                                                                                                                                              | L7     | Pd <sub>2</sub> (dba) <sub>3</sub>                                                                                                                      | DMSO    | Cs <sub>2</sub> CO <sub>3</sub> | 63                     | trace |
| 24                                                                                                                                                                                                                                                                              | L7     | PdCl <sub>2</sub> (CH <sub>3</sub> CN) <sub>2</sub>                                                                                                     | DMSO    | Cs <sub>2</sub> CO <sub>3</sub> | trace                  | —     |
| 25                                                                                                                                                                                                                                                                              | L7     | PdCl <sub>2</sub> (CH <sub>2</sub> CN) <sub>4</sub> (BF <sub>4</sub> )                                                                                  | DMSO    | Cs <sub>2</sub> CO <sub>3</sub> | 33                     | —     |
| 26                                                                                                                                                                                                                                                                              | L7     | Pd(PPh <sub>3</sub> ) <sub>4</sub>                                                                                                                      | DMSO    | Cs <sub>2</sub> CO <sub>3</sub> | 34                     | trace |

|    |    |                                    |             |                                 |       |       |
|----|----|------------------------------------|-------------|---------------------------------|-------|-------|
| 27 | L7 | Pd(OPiv) <sub>2</sub>              | DMSO        | Cs <sub>2</sub> CO <sub>3</sub> | 41    | trace |
| 28 | L7 | Pd <sub>2</sub> (dba) <sub>3</sub> | DMF         | Cs <sub>2</sub> CO <sub>3</sub> | 16    | trace |
| 29 | L7 | Pd <sub>2</sub> (dba) <sub>3</sub> | DMA         | Cs <sub>2</sub> CO <sub>3</sub> | 19    | —     |
| 30 | L7 | Pd <sub>2</sub> (dba) <sub>3</sub> | 1,4-dioxane | Cs <sub>2</sub> CO <sub>3</sub> | trace | —     |
| 31 | L7 | Pd <sub>2</sub> (dba) <sub>3</sub> | PhMe        | Cs <sub>2</sub> CO <sub>3</sub> | trace | —     |
| 32 | L7 | Pd <sub>2</sub> (dba) <sub>3</sub> | mesitylene  | Cs <sub>2</sub> CO <sub>3</sub> | trace | —     |
| 33 | L7 | Pd <sub>2</sub> (dba) <sub>3</sub> | MeCN        | Cs <sub>2</sub> CO <sub>3</sub> | trace | —     |
| 34 | L7 | Pd <sub>2</sub> (dba) <sub>3</sub> | DCE         | Cs <sub>2</sub> CO <sub>3</sub> | trace | —     |
| 35 | L7 | Pd <sub>2</sub> (dba) <sub>3</sub> | DMSO        | CsF                             | 18    | trace |
| 36 | L7 | Pd <sub>2</sub> (dba) <sub>3</sub> | DMSO        | KOH                             | 19    | —     |
| 37 | L7 | Pd <sub>2</sub> (dba) <sub>3</sub> | DMSO        | K <sub>2</sub> CO <sub>3</sub>  | 32    | trace |
| 38 | L7 | Pd <sub>2</sub> (dba) <sub>3</sub> | DMSO        | <sup>t</sup> BuOK               | 22    | trace |
| 39 | L7 | Pd <sub>2</sub> (dba) <sub>3</sub> | DMSO        | HCOON                           | trace | —     |
| 40 | L7 | Pd <sub>2</sub> (dba) <sub>3</sub> | DMSO        | Et <sub>3</sub> N               | trace | —     |

<sup>a</sup>Reaction conditions: Bromobenzene (**1**, 0.2 mmol), *tert*-butyl isocyanide (**2**, 3.0 equiv, 0.6 mmol), ligand (20 mol%), Pd catalyst (10 mol%), base (1.0 equiv, 0.2 mmol), and H<sub>2</sub>O (100 μL) in 1.0 mL of dry solvent under an Ar atmosphere at 90 °C for 12 h. <sup>b</sup>Isolated yield of **3** and **4** based on bromobenzene is given. <sup>c</sup>Performed with 5 mol% of PdCl<sub>2</sub> and 10 mol% of PPh<sub>3</sub>. DMSO = dimethyl sulfoxide. DMF = *N,N*-dimethylformamide. DMA = *N,N*-Dimethylacetamide. DCE = 1,2-dichloroethane. NR = no reaction.

**Table S2. Screening of other reaction parameters<sup>a</sup>**

| $  \begin{array}{c}  \text{Pd}_2(\text{dba})_3 \text{ (10 mol\%)} \\  \text{TBD (20 mol\%)} \\  \text{Cs}_2\text{CO}_3 \text{ (x equiv), H}_2\text{O (100 }\mu\text{L)} \\  \text{DMSO (1.0 mL), temperature, Ar, time} \\  \xrightarrow{\text{then}} \\  \text{Silica Gel Column Chromatography}  \end{array}  $ |                                           |             |                  |           |                        |
|-------------------------------------------------------------------------------------------------------------------------------------------------------------------------------------------------------------------------------------------------------------------------------------------------------------------|-------------------------------------------|-------------|------------------|-----------|------------------------|
| Entry                                                                                                                                                                                                                                                                                                             | 1                                         | 2           | 3                | 4         | 5                      |
| Entry                                                                                                                                                                                                                                                                                                             | Cs <sub>2</sub> CO <sub>3</sub> (x equiv) | 2 (y equiv) | Temperature (°C) | Time      | Yield (%) <sup>b</sup> |
| 1                                                                                                                                                                                                                                                                                                                 | 1.0                                       | 3.0         | 90               | 12        | 63                     |
| 2                                                                                                                                                                                                                                                                                                                 | 2.0                                       | 3.0         | 90               | 12        | 77                     |
| 3                                                                                                                                                                                                                                                                                                                 | 3.0                                       | 3.0         | 90               | 12        | 60                     |
| 4                                                                                                                                                                                                                                                                                                                 | 2.0                                       | 2.0         | 90               | 12        | 56                     |
| <b>5</b>                                                                                                                                                                                                                                                                                                          | <b>2.0</b>                                | <b>2.5</b>  | <b>90</b>        | <b>12</b> | <b>81</b>              |
| 6                                                                                                                                                                                                                                                                                                                 | 2.0                                       | 3.5         | 90               | 12        | 69                     |
| 7                                                                                                                                                                                                                                                                                                                 | 2.0                                       | 4.0         | 90               | 12        | 65                     |
| 8                                                                                                                                                                                                                                                                                                                 | 2.0                                       | 2.5         | 120              | 12        | 37                     |
| 9                                                                                                                                                                                                                                                                                                                 | 2.0                                       | 2.5         | 90               | 3         | 49                     |
| 10                                                                                                                                                                                                                                                                                                                | 2.0                                       | 2.5         | 90               | 6         | 70                     |
| 11                                                                                                                                                                                                                                                                                                                | 2.0                                       | 2.5         | 90               | 18        | 76                     |
| 12 <sup>c</sup>                                                                                                                                                                                                                                                                                                   | 2.0                                       | 2.5         | 90               | 12        | 63                     |

<sup>a</sup>Reaction conditions: Bromobenzene (**1**, 0.2 mmol), *tert*-butyl isocyanide (**2**, y equiv, 0.2y mmol), TBD (20 mol%), Pd<sub>2</sub>(dba)<sub>3</sub> (10 mol%), Cs<sub>2</sub>CO<sub>3</sub> (x equiv, 0.2x mmol), and H<sub>2</sub>O (100 μL) in dry DMSO (1.0 mL) under an Ar atmosphere at 90–120 °C for 3–18 h. <sup>b</sup>Isolated yield of **3** based on bromobenzene is given. <sup>c</sup>Performed with 5 mol% of Pd<sub>2</sub>(dba)<sub>3</sub>.

## 2.2 Synthesis of 3 from iodobenzene

**Table S3. Screening of ligands, Pd-catalysts, solvents and base<sup>a</sup>**

$\text{Ph-I} + \text{t-Bu-N-C}\equiv\text{N} \xrightarrow[\text{then Silica Gel Column Chromatography}]{\text{Pd catalyst (10 mol\%), Ligand (20 mol\%), Base (1.0 equiv), H}_2\text{O (100 }\mu\text{L), Solvent (1.0 mL), 90 }^\circ\text{C, Ar, 12 h}}$

3

| Entry | Ligand | Pd catalyst                                         | Solvent | Base                            | Yield (%) <sup>b</sup> |
|-------|--------|-----------------------------------------------------|---------|---------------------------------|------------------------|
| 1     | L1     | PdCl <sub>2</sub>                                   | DMSO    | Cs <sub>2</sub> CO <sub>3</sub> | 31                     |
| 2     | L2     | PdCl <sub>2</sub>                                   | DMSO    | Cs <sub>2</sub> CO <sub>3</sub> | trace                  |
| 3     | L3     | PdCl <sub>2</sub>                                   | DMSO    | Cs <sub>2</sub> CO <sub>3</sub> | NR                     |
| 4     | L4     | PdCl <sub>2</sub>                                   | DMSO    | Cs <sub>2</sub> CO <sub>3</sub> | NR                     |
| 5     | L5     | PdCl <sub>2</sub>                                   | DMSO    | Cs <sub>2</sub> CO <sub>3</sub> | NR                     |
| 6     | L6     | PdCl <sub>2</sub>                                   | DMSO    | Cs <sub>2</sub> CO <sub>3</sub> | NR                     |
| 7     | L7     | PdCl <sub>2</sub>                                   | DMSO    | Cs <sub>2</sub> CO <sub>3</sub> | 62                     |
| 8     | L8     | PdCl <sub>2</sub>                                   | DMSO    | Cs <sub>2</sub> CO <sub>3</sub> | NR                     |
| 9     | L9     | PdCl <sub>2</sub>                                   | DMSO    | Cs <sub>2</sub> CO <sub>3</sub> | 53                     |
| 10    | L10    | PdCl <sub>2</sub>                                   | DMSO    | Cs <sub>2</sub> CO <sub>3</sub> | 44                     |
| 11    | L11    | PdCl <sub>2</sub>                                   | DMSO    | Cs <sub>2</sub> CO <sub>3</sub> | NR                     |
| 12    | L12    | PdCl <sub>2</sub>                                   | DMSO    | Cs <sub>2</sub> CO <sub>3</sub> | 43                     |
| 13    | L13    | PdCl <sub>2</sub>                                   | DMSO    | Cs <sub>2</sub> CO <sub>3</sub> | 43                     |
| 14    | L14    | PdCl <sub>2</sub>                                   | DMSO    | Cs <sub>2</sub> CO <sub>3</sub> | trace                  |
| 15    | L15    | PdCl <sub>2</sub>                                   | DMSO    | Cs <sub>2</sub> CO <sub>3</sub> | trace                  |
| 16    | L16    | PdCl <sub>2</sub>                                   | DMSO    | Cs <sub>2</sub> CO <sub>3</sub> | NR                     |
| 17    | L17    | PdCl <sub>2</sub>                                   | DMSO    | Cs <sub>2</sub> CO <sub>3</sub> | trace                  |
| 18    | L7     | Pd(OAc) <sub>2</sub>                                | DMSO    | Cs <sub>2</sub> CO <sub>3</sub> | 36                     |
| 19    | L7     | PdBr <sub>2</sub>                                   | DMSO    | Cs <sub>2</sub> CO <sub>3</sub> | 37                     |
| 20    | L7     | PdCl <sub>2</sub> (PPh <sub>3</sub> ) <sub>2</sub>  | DMSO    | Cs <sub>2</sub> CO <sub>3</sub> | 49                     |
| 21    | L7     | Pd(TFA) <sub>2</sub>                                | DMSO    | Cs <sub>2</sub> CO <sub>3</sub> | 53                     |
| 22    | L7     | PdCl <sub>2</sub> (nbd)                             | DMSO    | Cs <sub>2</sub> CO <sub>3</sub> | 65                     |
| 23    | L7     | [(π-cinnamyl)PdCl] <sub>2</sub>                     | DMSO    | Cs <sub>2</sub> CO <sub>3</sub> | 29                     |
| 24    | L7     | PdCl <sub>2</sub> (dppb)                            | DMSO    | Cs <sub>2</sub> CO <sub>3</sub> | 36                     |
| 25    | L7     | Pd(dppf) <sub>2</sub> Cl <sub>2</sub>               | DMSO    | Cs <sub>2</sub> CO <sub>3</sub> | 39                     |
| 26    | L7     | PdCl <sub>2</sub> (dippf)                           | DMSO    | Cs <sub>2</sub> CO <sub>3</sub> | trace                  |
| 27    | L7     | PdI <sub>2</sub>                                    | DMSO    | Cs <sub>2</sub> CO <sub>3</sub> | 30                     |
| 28    | L7     | PdCl <sub>2</sub> (CH <sub>3</sub> CN) <sub>2</sub> | DMSO    | Cs <sub>2</sub> CO <sub>3</sub> | 50                     |

|           |           |                                                                                                                                                                                                                                         |                  |                                            |       |
|-----------|-----------|-----------------------------------------------------------------------------------------------------------------------------------------------------------------------------------------------------------------------------------------|------------------|--------------------------------------------|-------|
| 29        | L7        | $\text{PdCl}_2(\text{CH}_2\text{CN})_4(\text{BF}_4)_2$                                                                                                                                                                                  | DMSO             | $\text{Cs}_2\text{CO}_3$                   | 51    |
| 30        | L7        | Pd-117                                                                                                                                                                                                                                  | DMSO             | $\text{Cs}_2\text{CO}_3$                   | 51    |
| 31        | L7        | $\text{Pd}(\text{PPh}_3)_4$                                                                                                                                                                                                             | DMSO             | $\text{Cs}_2\text{CO}_3$                   | 52    |
| <b>32</b> | <b>L7</b> | <b><math>\text{Pd}_2(\text{dba})_3</math></b>                                                                                                                                                                                           | <b>DMSO</b>      | <b><math>\text{Cs}_2\text{CO}_3</math></b> | 70    |
| 33        | L7        | $\text{Pd}(\text{OPiv})_2$                                                                                                                                                                                                              | DMSO             | $\text{Cs}_2\text{CO}_3$                   | 25    |
| 34        | L7        | $\text{Pd}(\text{OTf})_2(\text{dipp})$                                                                                                                                                                                                  | DMSO             | $\text{Cs}_2\text{CO}_3$                   | 26    |
| 35        | L7        | 1,3-bis[2,6-bis(1-methyl<br>ethyl)phenyl]-1,3-<br>dihydro-2 <i>H</i> -imidazol-2-<br>ylidene]chloro ( $\eta^3$ -2-<br>propen-1-yl)palladium<br>dichloro[1,3-<br>bis(diisopropylphenyl)-2-<br>imidazolidinylidene]<br>palladium(II)dimer | DMSO             | $\text{Cs}_2\text{CO}_3$                   | 52    |
| 36        | L7        | [PdCl(2-(dimethyl<br>amino)methylphenyl)] <sub>2</sub>                                                                                                                                                                                  | DMSO             | $\text{Cs}_2\text{CO}_3$                   | trace |
| 37        | L7        | $\text{Pd}_2(\text{dba})_3$                                                                                                                                                                                                             | DMF              | $\text{Cs}_2\text{CO}_3$                   | 23    |
| 38        | L7        | $\text{Pd}_2(\text{dba})_3$                                                                                                                                                                                                             | DMA              | $\text{Cs}_2\text{CO}_3$                   | 24    |
| 39        | L7        | $\text{Pd}_2(\text{dba})_3$                                                                                                                                                                                                             | 1,4-dioxane      | $\text{Cs}_2\text{CO}_3$                   | trace |
| 40        | L7        | $\text{Pd}_2(\text{dba})_3$                                                                                                                                                                                                             | NMP              | $\text{Cs}_2\text{CO}_3$                   | 24    |
| 41        | L7        | $\text{Pd}_2(\text{dba})_3$                                                                                                                                                                                                             | HMPA             | $\text{Cs}_2\text{CO}_3$                   | 22    |
| 42        | L7        | $\text{Pd}_2(\text{dba})_3$                                                                                                                                                                                                             | toluene          | $\text{Cs}_2\text{CO}_3$                   | trace |
| 43        | L7        | $\text{Pd}_2(\text{dba})_3$                                                                                                                                                                                                             | benzotrifluoride | $\text{Cs}_2\text{CO}_3$                   | trace |
| 44        | L7        | $\text{Pd}_2(\text{dba})_3$                                                                                                                                                                                                             | mesitylene       | $\text{Cs}_2\text{CO}_3$                   | trace |
| 45        | L7        | $\text{Pd}_2(\text{dba})_3$                                                                                                                                                                                                             | MeCN             | $\text{Cs}_2\text{CO}_3$                   | trace |
| 46        | L7        | $\text{Pd}_2(\text{dba})_3$                                                                                                                                                                                                             | DCE              | $\text{Cs}_2\text{CO}_3$                   | trace |
| 47        | L7        | $\text{Pd}_2(\text{dba})_3$                                                                                                                                                                                                             | cyclohexane      | $\text{Cs}_2\text{CO}_3$                   | NR    |
| 48        | L7        | $\text{Pd}_2(\text{dba})_3$                                                                                                                                                                                                             | DMSO             | CsF                                        | 12    |
| 49        | L7        | $\text{Pd}_2(\text{dba})_3$                                                                                                                                                                                                             | DMSO             | KOH                                        | 24    |
| 50        | L7        | $\text{Pd}_2(\text{dba})_3$                                                                                                                                                                                                             | DMSO             | $\text{K}_2\text{CO}_3$                    | 21    |
| 51        | L7        | $\text{Pd}_2(\text{dba})_3$                                                                                                                                                                                                             | DMSO             | $t\text{BuOK}$                             | 17    |

<sup>a</sup>Reaction conditions: Iodobenzene (0.2 mmol), *tert*-butyl isocyanide (3.0 equiv, 0.6 mmol), Pd catalyst (10 mol%), base (1.0 equiv, 0.2 mmol), and H<sub>2</sub>O (100  $\mu\text{L}$ ) in 1.0 mL of dry solvent under an Ar atmosphere at 90 °C for 12 h. <sup>b</sup>Isolated yield of **3** based on iodobenzene is given. DMSO = dimethyl sulfoxide. DMF = *N,N*-dimethylformamide. DMA = *N,N*-Dimethylacetamide. NMP = *N*-methylpyrrolidone. HMPA = Hexamethylphosphoramide. DCE = 1,2-dichloroethane. NR = no reaction.

**Table S4. Screening of other reaction parameters<sup>a</sup>**

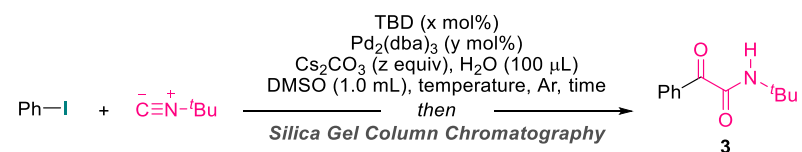

| Entry     | Time       | Isocyanide (w equiv) | Cs <sub>2</sub> CO <sub>3</sub> (z equiv) | Pd <sub>2</sub> (dba) <sub>3</sub> (y mol%) | TBD (x mol%) | Temperature (°C) | Yield (%) <sup>b</sup> |
|-----------|------------|----------------------|-------------------------------------------|---------------------------------------------|--------------|------------------|------------------------|
| 1         | 12 h       | 3.0                  | 1.0                                       | 10                                          | 20           | 90               | 70                     |
| 2         | 4 h        | 3.0                  | 1.0                                       | 10                                          | 20           | 90               | 64                     |
| 3         | 1 h        | 3.0                  | 1.0                                       | 10                                          | 20           | 90               | 74                     |
| 4         | 50 min     | 3.0                  | 1.0                                       | 10                                          | 20           | 90               | 65                     |
| 5         | 30 min     | 3.0                  | 1.0                                       | 10                                          | 20           | 90               | 58                     |
| 6         | 20 min     | 3.0                  | 1.0                                       | 10                                          | 20           | 90               | 33                     |
| 7         | 10 min     | 3.0                  | 1.0                                       | 10                                          | 20           | 90               | 21                     |
| 8         | 1 h        | 2.0                  | 1.0                                       | 10                                          | 20           | 90               | 70                     |
| 9         | 1 h        | 2.5                  | 1.0                                       | 10                                          | 20           | 90               | 75                     |
| 10        | 1 h        | 3.0                  | 1.0                                       | 10                                          | 20           | 90               | 77                     |
| 11        | 1 h        | 3.5                  | 1.0                                       | 10                                          | 20           | 90               | 77                     |
| 12        | 1 h        | 2.5                  | 1.5                                       | 10                                          | 20           | 90               | 84                     |
| <b>13</b> | <b>1 h</b> | <b>2.5</b>           | <b>2.0</b>                                | <b>10</b>                                   | <b>20</b>    | <b>90</b>        | <b>93</b>              |
| 14        | 1 h        | 2.5                  | 2.5                                       | 10                                          | 20           | 90               | 84                     |
| 15        | 1 h        | 2.5                  | 2.0                                       | 5                                           | 20           | 90               | 54                     |
| 16        | 1 h        | 2.5                  | 2.0                                       | 10                                          | 10           | 90               | 46                     |

|    |     |     |     |    |    |    |    |
|----|-----|-----|-----|----|----|----|----|
| 17 | 1 h | 2.5 | 2.0 | 10 | 20 | 80 | 72 |
| 18 | 1 h | 2.5 | 2.0 | 10 | 20 | 70 | 34 |

<sup>a</sup>Reaction conditions: Iodobenzene (0.2 mmol), *tert*-butyl isocyanide (w equiv, 0.2w mmol), TBD (x mol%), Pd<sub>2</sub>(dba)<sub>3</sub> (y mol%), Cs<sub>2</sub>CO<sub>3</sub> (z equiv, 0.2z mmol), and H<sub>2</sub>O (100 μL) in dry DMSO (1.0 mL) under an Ar atmosphere at 70–90 °C for 10 min–12 h. <sup>b</sup>Isolated yield of **3** based on iodobenzene is given.

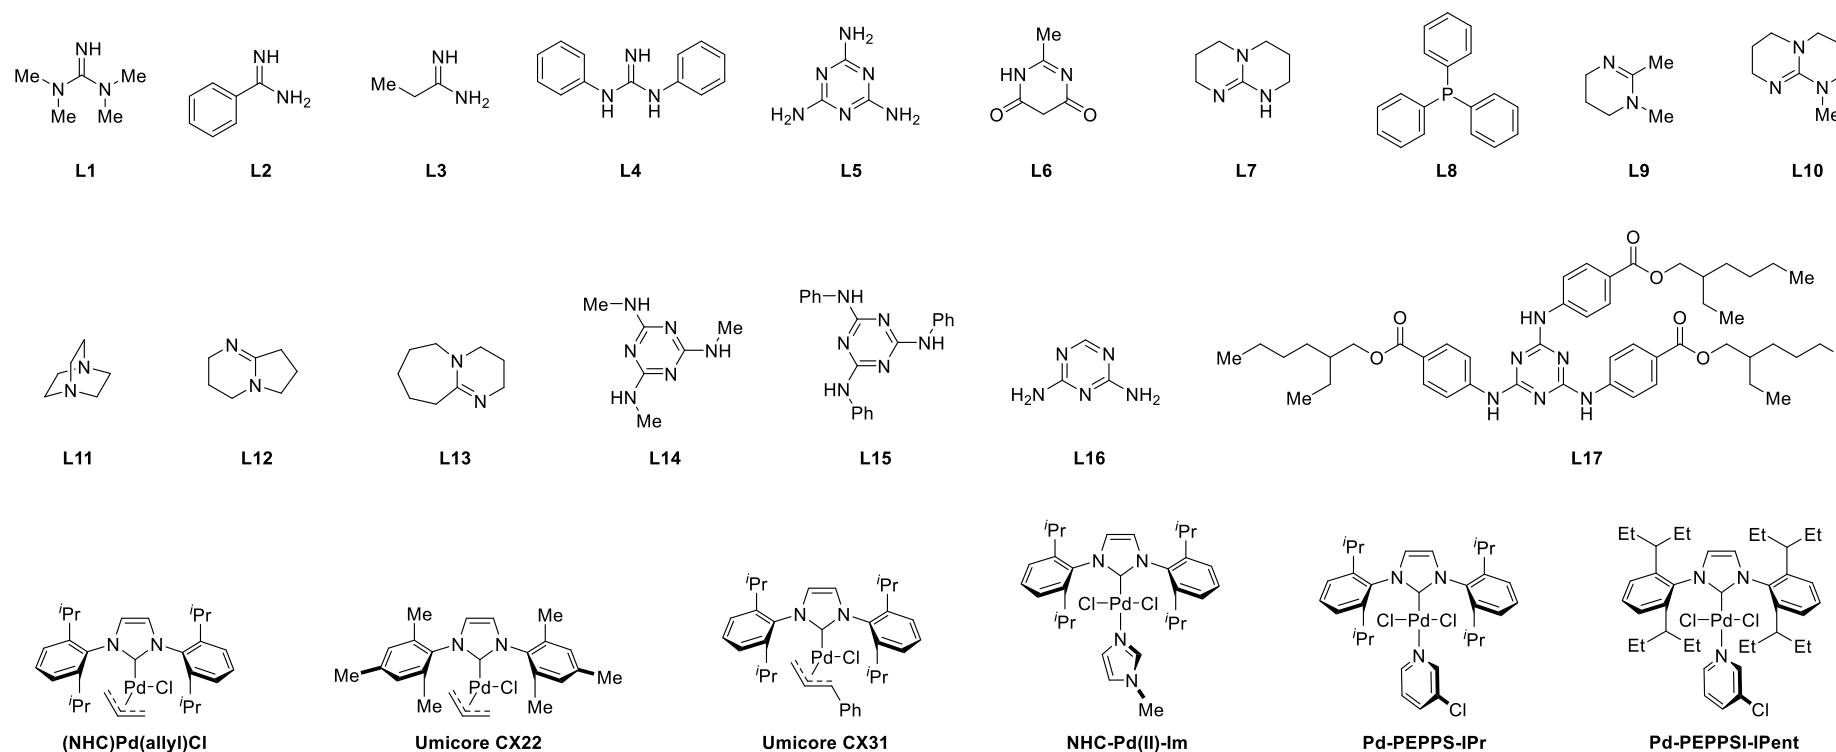

**Fig. S1** Ligands and palladium complexes examined in the optimization of reaction conditions for the synthesis of **3**

## 2.3 Synthesis of 3 from phenyl trifluoromethanesulfonate

**Table S5. Screening of temperature, time, Pd-catalysts and base<sup>a</sup>**

| $\text{Ph-OTf} + \text{C}\equiv\text{N}^+\text{-tBu} \xrightarrow[\text{Silica Gel Column Chromatography}]{\begin{array}{c} \text{Pd catalyst (10 mol\%)} \\ \text{TBD (20 mol\%)} \\ \text{Base (2.0 equiv), H}_2\text{O (100 }\mu\text{L)} \\ \text{DMSO (1 mL), temperature, Ar, time} \\ \text{then} \end{array}} \text{Ph-C(=O)-C(=O)-N}^+\text{-tBu}$ <p style="text-align: center;"><b>3</b></p> |                  |          |                                                                                     |                                     |                        |
|---------------------------------------------------------------------------------------------------------------------------------------------------------------------------------------------------------------------------------------------------------------------------------------------------------------------------------------------------------------------------------------------------------|------------------|----------|-------------------------------------------------------------------------------------|-------------------------------------|------------------------|
| Entry                                                                                                                                                                                                                                                                                                                                                                                                   | Temperature (°C) | Time (h) | Pd catalyst                                                                         | Base                                | Yield (%) <sup>b</sup> |
| 1                                                                                                                                                                                                                                                                                                                                                                                                       | 90               | 6        | Pd <sub>2</sub> (dba) <sub>3</sub>                                                  | Cs <sub>2</sub> CO <sub>3</sub>     | 8                      |
| 2                                                                                                                                                                                                                                                                                                                                                                                                       | 90               | 12       | Pd <sub>2</sub> (dba) <sub>3</sub>                                                  | Cs <sub>2</sub> CO <sub>3</sub>     | 9                      |
| 3                                                                                                                                                                                                                                                                                                                                                                                                       | 120              | 6        | Pd <sub>2</sub> (dba) <sub>3</sub>                                                  | Cs <sub>2</sub> CO <sub>3</sub>     | 13                     |
| 4                                                                                                                                                                                                                                                                                                                                                                                                       | 120              | 12       | Pd <sub>2</sub> (dba) <sub>3</sub>                                                  | Cs <sub>2</sub> CO <sub>3</sub>     | 13                     |
| 5                                                                                                                                                                                                                                                                                                                                                                                                       | 150              | 6        | Pd <sub>2</sub> (dba) <sub>3</sub>                                                  | Cs <sub>2</sub> CO <sub>3</sub>     | 11                     |
| 6                                                                                                                                                                                                                                                                                                                                                                                                       | 150              | 12       | Pd <sub>2</sub> (dba) <sub>3</sub>                                                  | Cs <sub>2</sub> CO <sub>3</sub>     | 10                     |
| 7                                                                                                                                                                                                                                                                                                                                                                                                       | 120              | 6        | Pd(dba) <sub>2</sub>                                                                | Cs <sub>2</sub> CO <sub>3</sub>     | 13                     |
| 8                                                                                                                                                                                                                                                                                                                                                                                                       | 120              | 6        | PdCl <sub>2</sub>                                                                   | Cs <sub>2</sub> CO <sub>3</sub>     | 25                     |
| 9                                                                                                                                                                                                                                                                                                                                                                                                       | 120              | 6        | Pd(OAc) <sub>2</sub>                                                                | Cs <sub>2</sub> CO <sub>3</sub>     | 12                     |
| 10                                                                                                                                                                                                                                                                                                                                                                                                      | 120              | 6        | PdBr <sub>2</sub>                                                                   | Cs <sub>2</sub> CO <sub>3</sub>     | 8                      |
| 11                                                                                                                                                                                                                                                                                                                                                                                                      | 120              | 6        | PdCl <sub>2</sub> (PPh <sub>3</sub> ) <sub>2</sub>                                  | Cs <sub>2</sub> CO <sub>3</sub>     | trace                  |
| 12                                                                                                                                                                                                                                                                                                                                                                                                      | 120              | 6        | Pd(TFA) <sub>2</sub>                                                                | Cs <sub>2</sub> CO <sub>3</sub>     | trace                  |
| 13                                                                                                                                                                                                                                                                                                                                                                                                      | 120              | 6        | PdCl <sub>2</sub> (nbd)                                                             | Cs <sub>2</sub> CO <sub>3</sub>     | 9                      |
| 14                                                                                                                                                                                                                                                                                                                                                                                                      | 120              | 6        | [(π-cinnamyl)PdCl] <sub>2</sub>                                                     | Cs <sub>2</sub> CO <sub>3</sub>     | 20                     |
| 15                                                                                                                                                                                                                                                                                                                                                                                                      | 120              | 6        | PdCl <sub>2</sub> (dppb)                                                            | Cs <sub>2</sub> CO <sub>3</sub>     | trace                  |
| 16                                                                                                                                                                                                                                                                                                                                                                                                      | 120              | 6        | Pd(dppf) <sub>2</sub> Cl <sub>2</sub>                                               | Cs <sub>2</sub> CO <sub>3</sub>     | trace                  |
| 17                                                                                                                                                                                                                                                                                                                                                                                                      | 120              | 6        | PdCl <sub>2</sub> (dippp)                                                           | Cs <sub>2</sub> CO <sub>3</sub>     | trace                  |
| 18                                                                                                                                                                                                                                                                                                                                                                                                      | 120              | 6        | PdI <sub>2</sub>                                                                    | Cs <sub>2</sub> CO <sub>3</sub>     | 18                     |
| 19                                                                                                                                                                                                                                                                                                                                                                                                      | 120              | 6        | PdCl <sub>2</sub> (CH <sub>3</sub> CN) <sub>2</sub>                                 | Cs <sub>2</sub> CO <sub>3</sub>     | trace                  |
| 20                                                                                                                                                                                                                                                                                                                                                                                                      | 120              | 6        | PdCl <sub>2</sub> (CH <sub>2</sub> CN) <sub>4</sub> (BF <sub>4</sub> ) <sub>2</sub> | Cs <sub>2</sub> CO <sub>3</sub>     | trace                  |
| <b>21</b>                                                                                                                                                                                                                                                                                                                                                                                               | <b>120</b>       | <b>6</b> | <b>Pd-117</b>                                                                       | <b>Cs<sub>2</sub>CO<sub>3</sub></b> | <b>36</b>              |
| 22                                                                                                                                                                                                                                                                                                                                                                                                      | 120              | 6        | Pd(PPh <sub>3</sub> ) <sub>4</sub>                                                  | Cs <sub>2</sub> CO <sub>3</sub>     | trace                  |
| 23                                                                                                                                                                                                                                                                                                                                                                                                      | 120              | 6        | Pd(OPiv) <sub>2</sub>                                                               | Cs <sub>2</sub> CO <sub>3</sub>     | trace                  |
| 24                                                                                                                                                                                                                                                                                                                                                                                                      | 120              | 6        | Pd(OTf) <sub>2</sub> (dippp)                                                        | Cs <sub>2</sub> CO <sub>3</sub>     | 16                     |
| 25                                                                                                                                                                                                                                                                                                                                                                                                      | 120              | 6        | (NHC)Pd(allyl)Cl                                                                    | Cs <sub>2</sub> CO <sub>3</sub>     | trace                  |
| 26                                                                                                                                                                                                                                                                                                                                                                                                      | 120              | 6        | Umicore CX22                                                                        | Cs <sub>2</sub> CO <sub>3</sub>     | trace                  |
| 27                                                                                                                                                                                                                                                                                                                                                                                                      | 120              | 6        | Umicore CX31                                                                        | Cs <sub>2</sub> CO <sub>3</sub>     | trace                  |
| 28                                                                                                                                                                                                                                                                                                                                                                                                      | 120              | 6        | NHC-Pd(II)-Im                                                                       | Cs <sub>2</sub> CO <sub>3</sub>     | trace                  |



|    |     |   |                 |                                 |       |
|----|-----|---|-----------------|---------------------------------|-------|
| 29 | 120 | 6 | Pd-PEPPS-IPr    | Cs <sub>2</sub> CO <sub>3</sub> | trace |
| 30 | 120 | 6 | Pd-PEPPSI-IPent | Cs <sub>2</sub> CO <sub>3</sub> | trace |
| 31 | 120 | 6 | Pd-117          | CsF                             | trace |
| 32 | 120 | 6 | Pd-117          | KOH                             | trace |
| 33 | 120 | 6 | Pd-117          | K <sub>2</sub> CO <sub>3</sub>  | trace |
| 34 | 120 | 6 | Pd-117          | <sup>t</sup> BuOK               | trace |
| 35 | 120 | 6 | Pd-117          | Et <sub>3</sub> N               | trace |
| 36 | 120 | 6 | Pd-117          | NaOCH <sub>3</sub>              | trace |
| 37 | 120 | 6 | Pd-117          | CsOPiv                          | trace |
| 38 | 120 | 6 | Pd-117          | K <sub>3</sub> PO <sub>4</sub>  | trace |
| 39 | 120 | 6 | Pd-117          | NaCNO                           | trace |
| 40 | 120 | 6 | Pd-117          | DBU                             | trace |
| 41 | 120 | 6 | Pd-117          | BABCO                           | trace |
| 42 | 120 | 6 | Pd-117          | CsOH                            | trace |
| 43 | 120 | 6 | Pd-117          | CsF                             | trace |
| 44 | 120 | 6 | Pd-117          | KOH                             | trace |
| 45 | 120 | 6 | Pd-117          | K <sub>2</sub> CO <sub>3</sub>  | trace |
| 46 | 120 | 6 | Pd-117          | <sup>t</sup> BuOK               | trace |

<sup>a</sup>Reaction conditions: Phenyl trifluoromethanesulfonate (0.2 mmol), *tert*-butyl isocyanide (2.5 equiv, 0.5 mmol), TBD (20 mol%), Pd catalyst (10 mol%), base (2.0 equiv, 0.4 mmol), and H<sub>2</sub>O (100  $\mu$ L) in dry DMSO (1.0 mL) under an Ar atmosphere at 90–150 °C for 6–12 h. <sup>b</sup>Isolated yield of **3** based on phenyl trifluoromethanesulfonate is given.

### 3. Procedures for the preparation of substrates

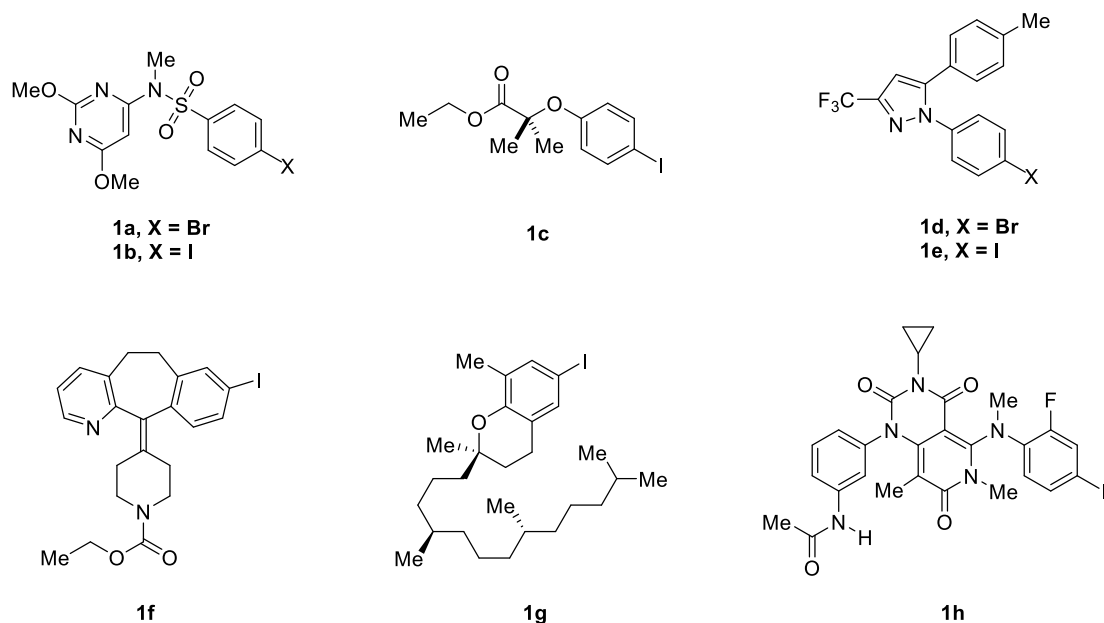

#### 3.1 Preparation of 1a

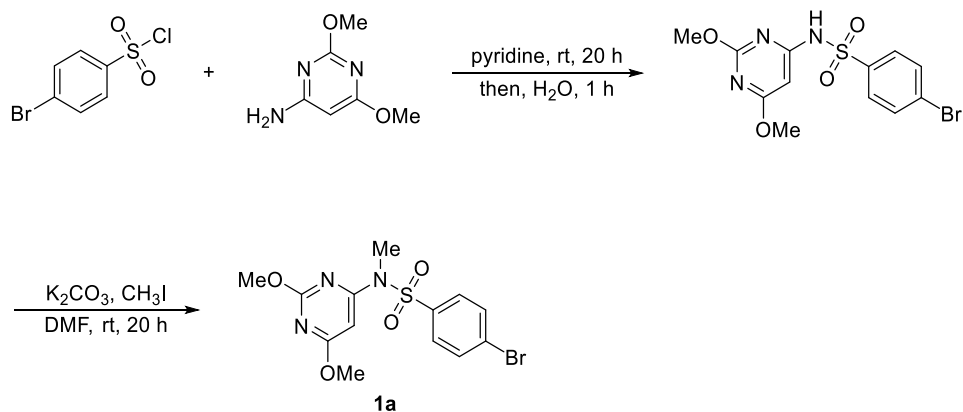

A mixture of 4-bromobenzenesulfonyl chloride (2.55 g, 10.0 mmol, 1.0 equiv) and 2,6-dimethoxypyrimidin-4-amine (1.62 g, 10.5 mmol, 1.05 equiv) in pyridine (25 mL) was stirred for 20 hours at room temperature. To the solution was then added H<sub>2</sub>O (50 mL) to produce a slurry. After stirring for 1 hour, the slurry was filtered, and the filter cake was washed with water (25 mL), after which the solid was dried in vacuo to yield the compound as a white solid (2.61 g, 70% yield).

A mixture of 4-bromo-*N*-(2,6-dimethoxypyrimidin-4-yl)benzenesulfonamide (1.86 g, 5.0 mmol, 1.0 equiv), K<sub>2</sub>CO<sub>3</sub> (0.69 g, 5.0 mmol, 1.0 equiv), and iodomethane (0.47 mL, 7.5 mmol, 1.5 equiv) in DMF (15 mL) was stirred for 20 hours at room temperature. Afterwards,

the reaction mixture was diluted with EtOAc (30 mL) and washed with water (30 mL). The aqueous layer was back-extracted with EtOAc (3 × 30 mL). The combined organic layers were then dried over Na<sub>2</sub>SO<sub>4</sub>, filtered, and concentrated in vacuo.<sup>1</sup> Purification by petroleum ether/ethyl acetate (10:1) provided the compound **1a** as a white solid (1.18 g, 61% yield).

### 3.2 Preparation of **1b**

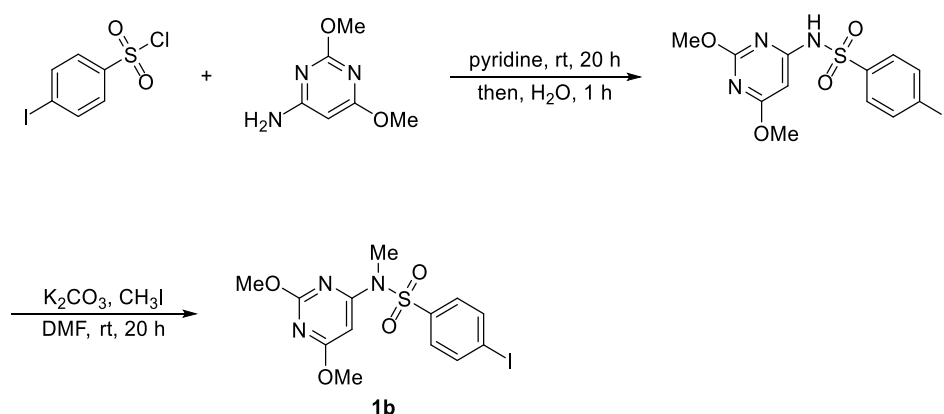

A mixture of 4-iodobenzenesulfonyl chloride (3.03 g, 10.0 mmol, 1.0 equiv) and 2,6-dimethoxypyrimidin-4-amine (1.62 g, 10.5 mmol, 1.05 equiv) in pyridine (25 mL) was stirred for 20 hours at room temperature. To the solution was then added H<sub>2</sub>O (50 mL) to produce a slurry. After stirring for 1 hour, the slurry was filtered, and the filter cake was washed with water (25 mL), after which the solid was dried in vacuo to yield the compound as a white solid (3.07 g, 73% yield).

A mixture of 4-bromo-*N*-(2,6-dimethoxypyrimidin-4-yl)benzenesulfonamide (2.11 g, 5.0 mmol, 1.0 equiv), K<sub>2</sub>CO<sub>3</sub> (0.69 g, 5.0 mmol, 1.0 equiv), and iodomethane (0.47 mL, 7.5 mmol, 1.5 equiv) in DMF (15 mL) was stirred for 20 hours at room temperature. Afterwards, the reaction mixture was diluted with EtOAc (30 mL) and washed with water (30 mL). The aqueous layer was back-extracted with EtOAc (3 × 30 mL). The combined organic layers were then dried over Na<sub>2</sub>SO<sub>4</sub>, filtered, and concentrated in vacuo.<sup>1</sup> Purification by petroleum ether/ethyl acetate (10:1) provided the compound **1b** as a white solid (1.41 g, 65% yield).

### 3.3 Preparation of **1c**

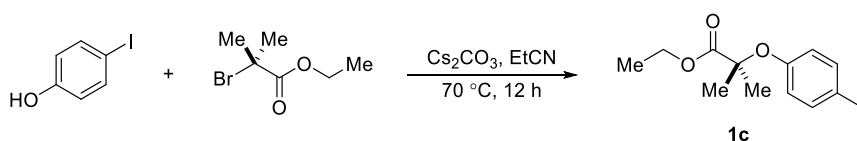

A flame-dried 100-mL round-bottom flask, equipped with a stir bar, was charged with 4-iodophenol (440.0 mg, 2.0 mmol, 1.0 equiv), ethyl 2-bromo-2-methylpropanoate (390.1 mg, 2.0 mmol, 1.0 equiv), cesium carbonate (390.1 mg, 4.0 mmol, 2.0 equiv), and MeCN (10 mL). The mixture was allowed to stir for 12 h at 70 °C. The mixture was then allowed to cool to room temperature and diluted with water (15 mL). The aqueous solution was then washed with ethyl acetate (10 mL x 3). The combined organic layers were dried over Na<sub>2</sub>SO<sub>4</sub> and filtered.<sup>2</sup> The solvent was removed by rotary evaporation and the residue was fully loaded onto a silica gel column and was eluted with petroleum ether/ethyl acetate (30:1 – 10:1) to give the compound **1c** as a colorless oil (621.3 mg, 93% yield).

### 3.4 Preparation of **1d**

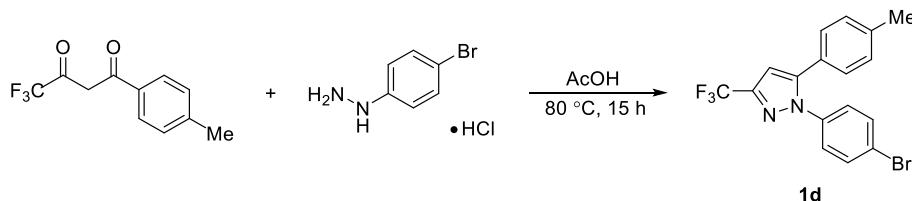

A Schlenk tube containing (4-iodophenyl)hydrazine hydrochloride (443.9 mg, 2.0 mmol, 1.0 equiv) and 4,4,4-trifluoro-1-(p-tolyl)butane-1,3-dione (460.4 mg, 2.0 mmol, 1.0 equiv) was evacuated and back-filled with anhydrous dinitrogen three times. Degassed acetic acid (10 mL) was added and the reaction mixture was stirred at 80 °C for 15 h. After cooling to room temperature, the reaction mixture was concentrated in vacuo.<sup>3</sup> The residue was fully loaded onto a silica gel column and was eluted with petroleum ether/ethyl acetate (20:1 – 10:1) to give the compound **1d** as a yellow solid (653.6 mg, 86% yield).

### 3.5 Preparation of **1e**

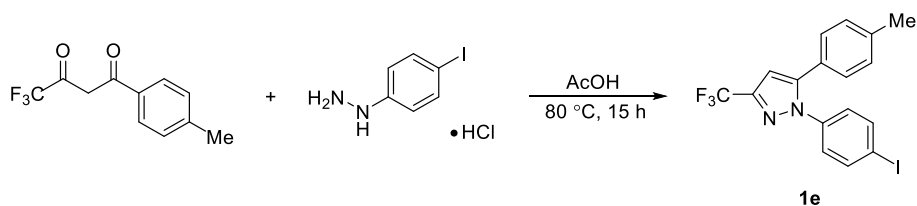

A Schlenk tube containing (4-iodophenyl)hydrazine hydrochloride (541.0 mg, 2.0 mmol, 1.0 equiv) and 4,4,4-trifluoro-1-(p-tolyl)butane-1,3-dione (460.4 mg, 2.0 mmol, 1.0 equiv) was evacuated and back-filled with anhydrous dinitrogen three times. Degassed acetic acid (10 mL) was added and the reaction mixture was stirred at 80 °C for 15 h. After cooling to room temperature, the reaction mixture was concentrated in vacuo.<sup>3</sup> The residue was fully loaded onto a silica gel column and was eluted with petroleum ether/ethyl acetate (20:1 – 10:1) to give the compound **1e** as a white solid (721.8 mg, 84% yield).

### 3.6 Preparation of **1f**

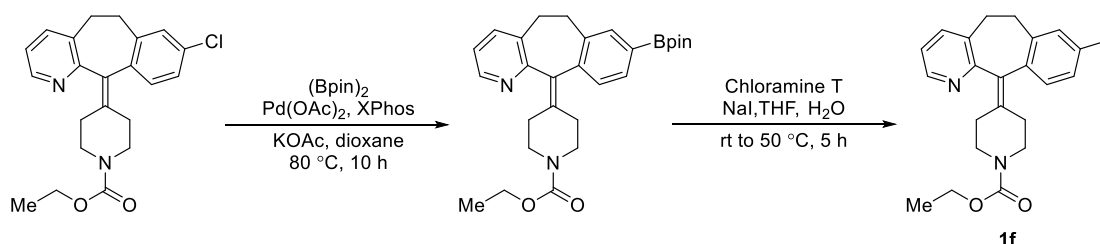

An oven dried 40 mL flask was charged with Loratadine (1.15 g, 3.0 mmol, 1.0 equiv), bis(pinacolato)diboron (0.91 g, 4.5 mmol, 1.2 equiv), KOAc (0.59 g, 6.0 mmol, 2.0 equiv), Pd(OAc)<sub>2</sub> (33.7 mg, 0.15 mmol, 5 mol%), XPhos (143.0 mg, 0.3 mmol, 10 mol%). They were transferred into a nitrogen-filled glovebox. Freshly distilled 1,4-dioxane (15 mL) was added to the flask in the glovebox. The flask was tightly sealed, transferred out of glovebox and stirred on a pie-block preheated to 80 °C for 10 h. The reaction mixture was filtered through Celite and taken up in 100 mL 2N HCl/ ethyl acetate. The layers were separated and the organic phase was discarded. The aqueous phase was then washed with ethyl acetate (15 mL × 3). After careful adjustment of pH to basic by adding 10N KOH (in the ice bath), the resulting slurry was extracted with ethyl acetate (25 mL × 3).<sup>4</sup> The combined organic phase was washed with brine, dried over Na<sub>2</sub>SO<sub>4</sub>, and concentrated to give a white solid (1.00 g, 70% yield).

The product (0.95 g 2.1 mmol) from the last step was dissolved in tetrahydrofuran (10 mL) and water (10 mL), and stirred at room temperature for 15 min. NaI (0.98 g, 4.3 mmol, 2.05 equiv) and Chloramine T (0.61 g, 4.1 mmol, 1.95 equiv) were then added at room temperature. After heating at 50 °C for 5 h, yellow solid precipitated from the solution. The reaction mixture was then diluted with water (20 mL) and extracted with CH<sub>2</sub>Cl<sub>2</sub> (20 mL × 3). The combined organic phase was washed with brine, dried over Na<sub>2</sub>SO<sub>4</sub>, and concentrated to give a yellowish solid.<sup>5</sup> The residue was fully loaded onto a silica gel column and was eluted with petroleum ether/ethyl acetate (20:1) to give the compound **2f** as a white solid (811.9 mg, 82% yield).

### 3.7 Preparation of **1g**

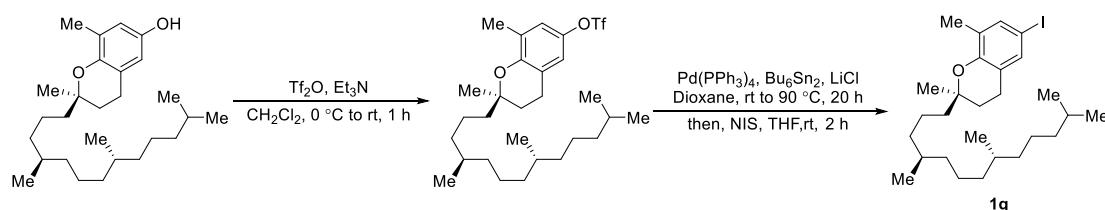

To a stirred solution of  $\delta$ -tocopherol (805.3 mg, 2.0 mmol, 1.0 equiv), triethylamine (834.0  $\mu$ L, 6.0 mmol, 3.0 equiv) in CH<sub>2</sub>Cl<sub>2</sub> (10 mL) was added trifluoromethanesulfonic anhydride (370.1  $\mu$ L, 2.2 mmol, 1.1 equiv) dropwise at 0 °C. The resulting mixture was warmed up to room temperature and stirred for 1 h. The resulting mixture was quenched with saturated NaHCO<sub>3</sub> (20 mL), extracted with CH<sub>2</sub>Cl<sub>2</sub> (20 mL × 3), dried over anhydrous Na<sub>2</sub>SO<sub>4</sub>, filtered, and concentrated under reduced pressure.<sup>6</sup> The residue was fully loaded onto a silica gel column and was eluted with petroleum ether/ethyl acetate (20:1) to give a yellow oil (1.03 g, 97% yield).

To a flask permanently connected to a reflux condenser was added and Pd(PPh<sub>3</sub>)<sub>4</sub> (115.6 mg, 5mol%), LiCl (423.9 mg, 10.0 mmol, 5.0 equiv), and bis(tributyltin) (2.32 g, 4.0 mmol, 2.0 equiv) under argon atmosphere. Added to the mixture was the yellow oil (1.07 g, 2.0 mmol, 1.0 equiv) from the last step and 20 mL dioxane. The mixture was heated to 90 °C and stirred 20 h. After cooling to rt, 50 mL hexanes added, the mixture was filtered through celite and solvents were evaporated to give crude product. Without further purification the product from the last step, it was dissolved in 75 mL THF followed by N-

iodosuccinimide (1.35 g, 6.0 mmol, 3.0 equiv). The mixture stirred for 2 h at rt. The reaction mixture was poured into saturated  $\text{Na}_2\text{S}_2\text{O}_3$  and extracted with EtOAc (100 mL  $\times$  3). The organic layers were washed with brine and dried over  $\text{Na}_2\text{SO}_4$ . After rotary evaporation the mixture solvent was concentrated by rotary evaporation to obtain the residue.<sup>7</sup> The residue was fully loaded onto a silica gel column and was eluted with petroleum ether/ethyl acetate (100:1) to give **1g** as a clear oil (881.1 mg, 86% yield).

### 3.8 Preparation of **1h**

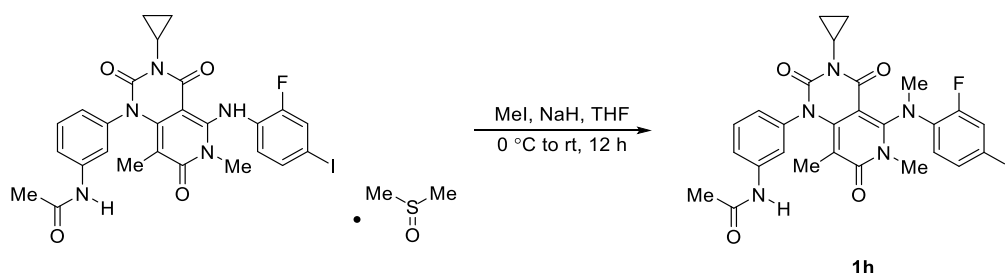

A 50 mL single-necked flask with a magnetic stir bar was charged with Trametinib (1.39 g, 2.0 mmol, 1.0 equiv) and dissolved in THF (10 mL). Add NaH (120.0 mg, 3.0 mmol, 1.5 equiv) to the reaction mixture at 0 °C and stir for 10 min, then add Iodomethane (186.8  $\mu\text{L}$ , 3.0 mmol, 1.5 equiv). After the addition was completed, the reaction mixture was stirred at 0 °C for 10 min and then at room temperature for 12 h. After the completion of the reaction monitored by TLC (thin layer chromatography), the solvent was concentrated by rotary evaporation to obtain the residue.<sup>8</sup> The residue was fully loaded onto a silica gel column and was eluted with petroleum ether/ethyl acetate (1:1) to give **1h** as a white solid (943.6 mg, 75% yield).

### 3.9 Preparation of isocyanides **2a**

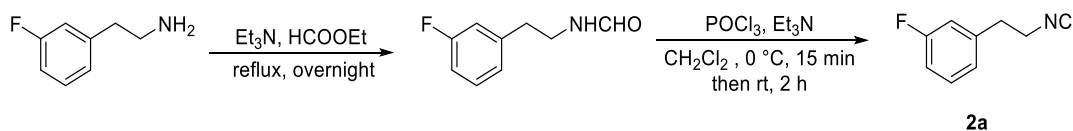

A 50 mL single-necked flask equipped with a stir bar and a reflux condenser was charged with a mixture of 2-(3-fluorophenyl)ethan-1-amine (695.4 mg, 5.0 mmol, 1.0 equiv), triethylamine (1.39 mL, 10.0 mmol, 2.0 equiv) and ethyl formate (12.3 mL, 150.0 mmol,

30.0 equiv). The reaction mixture was stirred and heated under reflux overnight. After the completion of the reaction monitored by TLC (thin layer chromatography), the solvent was concentrated by rotary evaporation to obtain the formamide as a residue, which was used directly in the next step without purification.

The residue prepared by above method was dissolved in  $\text{CH}_2\text{Cl}_2$  (20 mL) and then triethylamine was added (2.08 mL, 15.0 mmol, 3.0 equiv). The mixture was cooled at 0 °C and then the solution of  $\text{POCl}_3$  (513  $\mu\text{L}$ , 5.5 mmol, 1.1 equiv) in 10 mL of  $\text{CH}_2\text{Cl}_2$  was added dropwise to the mixture over 30 min. After the addition was completed, the reaction mixture was stirred at 0 °C for 15 min and then at room temperature for 2 h. After the completion of the reaction monitored by TLC (thin layer chromatography), an ice-cold saturated  $\text{NaHCO}_3$  solution (20 mL) was added to the mixture and extracted with  $\text{CH}_2\text{Cl}_2$  (3  $\times$  20 mL). The combined organic layers were washed with saturated  $\text{K}_2\text{CO}_3$  (3  $\times$  60 mL), dried over anhydrous  $\text{Na}_2\text{SO}_4$ , filtered and concentrated by rotary evaporation.<sup>9-11</sup> The residue was fully loaded onto a silica gel column and was eluted with petroleum ether/ethyl acetate (20:1) to give 1-fluoro-3-(2-isocyanoethyl)benzene **2a** as a brown oil (693.1 mg, 93% yield).



#### 4. Representative procedure for the synthesis of **3**

##### Synthesis of compound **3** from bromobenzene

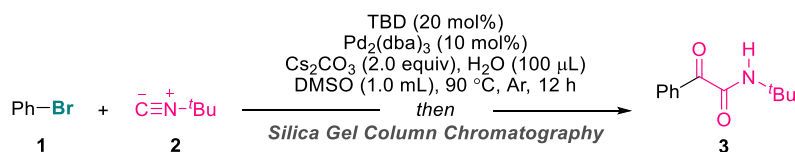

A 4-mL flame-dried vial with a magnetic stir bar was charged with bromobenzene (20.9  $\mu\text{L}$ , 0.2 mmol), TBD (5.6 mg, 20 mol%),  $\text{Pd}_2(\text{dba})_3$  (18.3 mg, 10 mol%),  $\text{Cs}_2\text{CO}_3$  (130.3 mg, 0.4 mmol),  $\text{H}_2\text{O}$  (100  $\mu\text{L}$ ) and extra dry DMSO (1.0 mL). The vial was evacuated and backfilled with argon for three times and then *tert*-butyl isocyanide (56.6  $\mu\text{L}$ , 0.5 mmol) was added by syringe under argon. The vial was then sealed and was stirred at 90  $^\circ\text{C}$  (oil bath) for 12 h. After the completion of the reaction monitored by TLC (thin layer chromatography), the reaction mixture was cooled to the room temperature and treated with water (15 mL), extracted with  $\text{CH}_2\text{Cl}_2$  (3  $\times$  15 mL), washed with brine (2  $\times$  40 mL). Then the organic layer was dried over anhydrous  $\text{Na}_2\text{SO}_4$ , filtered and concentrated. The residue was purified by flash column chromatography on silica gel and eluted with petroleum ether/ethyl acetate (30:1 – 10:1) to afford the product **3** (33.2 mg, 81% yield).

##### Synthesis of compound **3** from iodobenzene

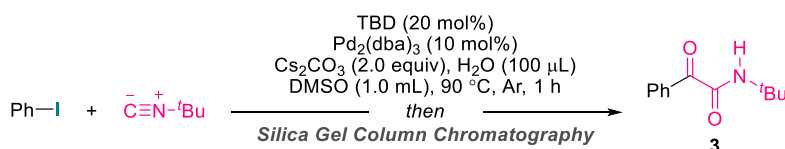

A 4-mL flame-dried vial with a magnetic stir bar was charged with iodobenzene (22.4  $\mu\text{L}$ , 0.2 mmol), TBD (5.6 mg, 20 mol%),  $\text{Pd}_2(\text{dba})_3$  (18.3 mg, 10 mol%),  $\text{Cs}_2\text{CO}_3$  (130.3 mg, 0.4 mmol),  $\text{H}_2\text{O}$  (100  $\mu\text{L}$ ) and extra dry DMSO (1.0 mL). The vial was evacuated and backfilled with argon for three times and then *tert*-butyl isocyanide (56.6  $\mu\text{L}$ , 0.5 mmol) was added by syringe under argon. The vial was then sealed and was stirred at 90  $^\circ\text{C}$  (oil bath) for 1 h. After the completion of the reaction monitored by TLC (thin layer chromatography), the reaction mixture was cooled to the room temperature and treated with water (15 mL), extracted with  $\text{CH}_2\text{Cl}_2$  (3  $\times$  15 mL), washed with brine (2  $\times$  40 mL). Then the organic layer was dried over anhydrous  $\text{Na}_2\text{SO}_4$ , filtered and concentrated. The residue was purified by

flash column chromatography on silica gel and eluted with petroleum ether/ethyl acetate (30:1 – 10:1) to afford the product **3** (38.2 mg, 93% yield).

*Synthesis of compound **3** from phenyl trifluoromethanesulfonate*

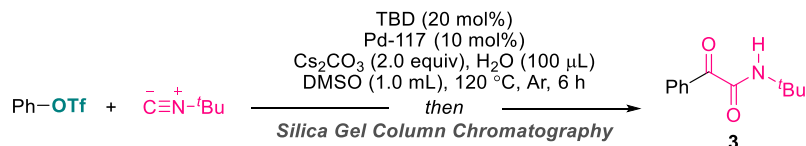

A 4-mL flame-dried vial with a magnetic stir bar was charged with phenyl trifluoromethanesulfonate (32.4  $\mu\text{L}$ , 0.2 mmol), TBD (5.6 mg, 20 mol%), Pd-117 (14.3 mg, 10 mol%),  $\text{Cs}_2\text{CO}_3$  (130.3 mg, 0.4 mmol),  $\text{H}_2\text{O}$  (100  $\mu\text{L}$ ) and extra dry DMSO (1.0 mL). The vial was evacuated and backfilled with argon for three times and then *tert*-butyl isocyanide (56.6  $\mu\text{L}$ , 0.5 mmol) was added by syringe under argon. The vial was then sealed and was stirred at 120  $^\circ\text{C}$  (oil bath) for 6 h. After the completion of the reaction monitored by TLC (thin layer chromatography), the reaction mixture was cooled to the room temperature and treated with water (15 mL), extracted with  $\text{CH}_2\text{Cl}_2$  (3  $\times$  15 mL), washed with brine (2  $\times$  40 mL). Then the organic layer was dried over anhydrous  $\text{Na}_2\text{SO}_4$ , filtered and concentrated. The residue was purified by flash column chromatography on silica gel and eluted with petroleum ether/ethyl acetate (30:1 – 10:1) to afford the product **3** (14.8 mg, 36% yield).

Products **5** – **58**, **70** – **75** were synthesized following these procedures.

## 5. Procedures for the synthesis of 59-69 and 76-81

### 5.1 Synthesis of **59** from **3**

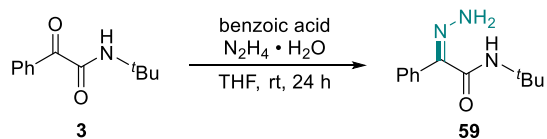

A 10 mL single-necked flask with a magnetic stir bar was charged with **3** (41.0 mg, 0.2 mmol, 1.0 equiv), benzoic acid (24.4 mg, 0.2 mmol, 1.0 equiv),  $\text{N}_2\text{H}_4 \cdot \text{H}_2\text{O}$  (12.5  $\mu\text{L}$ , 0.2 mmol, 1.0 equiv) and dissolved in THF (1.0 mL). After the addition was completed, the reaction mixture was stirred at room temperature for 24 h. After the completion of the reaction monitored by TLC (thin layer chromatography), the solvent was concentrated by rotary evaporation to obtain a residue.<sup>12</sup> The residue was fully loaded onto a silica gel column and was eluted with petroleum ether/ethyl acetate (2:1) to give **59** as a yellow oil (43.1 mg, 98% yield).

### 5.2 Synthesis of **60** from **3**

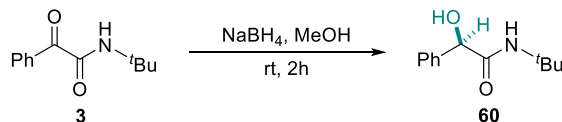

A 10 mL single-necked flask with a magnetic stir bar was charged with **3** (41.0 mg, 0.2 mmol, 1.0 equiv) and dissolved in MeOH (1.0 mL). Add  $\text{NaBH}_4$  (8.3 mg, 0.22 mmol, 1.1 equiv) to the reaction mixture at 0 °C and stir for 10 min. Then the reaction mixture was stirred at room temperature for 2 h. After the completion of the reaction monitored by TLC (thin layer chromatography), the solvent was concentrated by rotary evaporation to obtain a residue.<sup>13</sup> The residue was fully loaded onto a silica gel column and was eluted with petroleum ether/ethyl acetate (2:1) to give **60** as a white solid (37.9 mg, 92% yield).

### 5.3 Synthesis of **61** from **3**

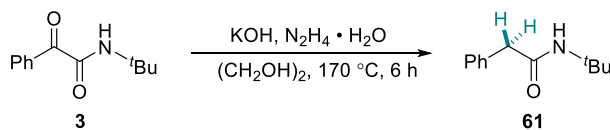

A 10 mL single-necked flask with a magnetic stir bar was charged with **3** (41.0 mg, 0.2 mmol, 1.0 equiv), KOH (56.1 mg, 1.0 mmol, 5.0 equiv), N<sub>2</sub>H<sub>4</sub>·H<sub>2</sub>O (0.5 mL) and dissolved in (CH<sub>2</sub>OH)<sub>2</sub> (1.0 mL). After the addition was completed, the reaction mixture was stirred at 170 °C for 6 h. After the completion of the reaction monitored by TLC (thin layer chromatography), the reaction mixture was cooled to the room temperature and treated with water (10 mL), extracted with CH<sub>2</sub>Cl<sub>2</sub> (3 × 10 mL), washed with brine (2 × 30 mL). Then the organic layer was dried over anhydrous Na<sub>2</sub>SO<sub>4</sub>, filtered and concentrated.<sup>14</sup> The residue was fully loaded onto a silica gel column and was eluted with petroleum ether/ethyl acetate (5:1) to give **61** as a white solid (31.6 mg, 83% yield).

#### 5.4 Synthesis of **62** from **3**

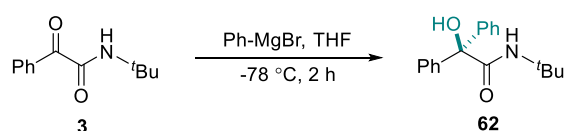

A 10 mL single-necked flask with a magnetic stir bar was charged with **3** (41.0 mg, 0.2 mmol, 1.0 equiv) and dissolved in THF (1.0 mL). Add the solution of Ph-MgBr (0.22 mL, 1 M in THF) to the reaction mixture at -78 °C and stir for 2 h. After the completion of the reaction monitored by TLC (thin layer chromatography), the reaction mixture was return to the room temperature and treated with water (10 mL), extracted with CH<sub>2</sub>Cl<sub>2</sub> (3 × 10 mL), the solvent was concentrated by rotary evaporation to obtain a residue.<sup>15</sup> The residue was fully loaded onto a silica gel column and was eluted with petroleum ether/ethyl acetate (5:1) to give **62** as a white solid (53.4 mg, 94% yield).

#### 5.5 Synthesis of **63**, **64** and **65** from **3**

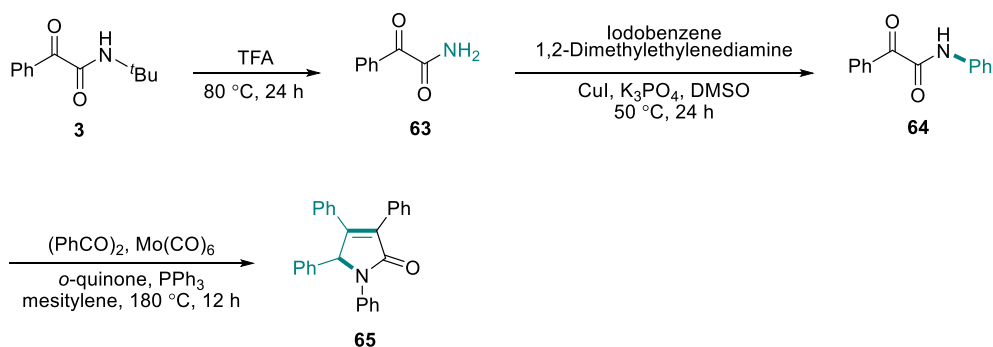

A 10-mL pressure tube with a magnetic stir bar was charged with **3** (41.0 mg, 0.2 mmol, 1.0 equiv) and trifluoroacetic acid (2.0 mL). The mixture was stirred at 80 °C for 24 h. After the completion of the reaction monitored by TLC (thin layer chromatography), the reaction mixture was diluted with water (30 mL) and extracted with CH<sub>2</sub>Cl<sub>2</sub> (3 × 30 mL). The combined organic layers were washed with water (60 mL) and saturated NaHCO<sub>3</sub> solution (2 × 60 mL), dried over Na<sub>2</sub>SO<sub>4</sub> and filtered.<sup>16</sup> The solvent was concentrated by rotary evaporation and the residue was fully loaded onto a silica gel column and eluted with petroleum ether/ethyl acetate (10:1 – 1:1) to afford compound **63** as a white solid (17.9 mg, 60% yield).

A mixture of **63** (29.8 mg, 0.2 mmol, 1.0 equiv), iodobenzene (26.9 µL, 0.24 mmol, 1.2 equiv), 1,2-Dimethylethylenediamine (1.8 mg, 10 mol%), CuI (3.8 mg, 10 mol%), K<sub>3</sub>PO<sub>4</sub> (84.9 mg, 2.0 equiv) and DMSO (1.0 mL). The vial was evacuated and backfilled with argon for three times and stirred at 50 °C for 24 h. After the completion of the reaction monitored by TLC (thin layer chromatography), the reaction mixture was cooled to the room temperature and treated with water (15 mL), extracted with CH<sub>2</sub>Cl<sub>2</sub> (3 × 15 mL), washed with brine (2 × 40 mL). Then the organic layer was dried over anhydrous Na<sub>2</sub>SO<sub>4</sub>, filtered and concentrated.<sup>17</sup> The residue was purified by flash column chromatography on silica gel and eluted with petroleum ether/ethyl acetate (10:1 – 5:1) to afford the product **64** as a yellow solid (41.4 mg, 92% yield).

Add **64** (45.0 mg, 0.2 mmol, 1.0 equiv) in a 10-mL pressure tube with a magnetic stir bar, and add (PhCO)<sub>2</sub> (63.1 mg, 0.3 mmol, 1.5 equiv), Mo(CO)<sub>6</sub> (5.3 mg, 10 mol%), o-quinone (4.4 mg, 10 mol%), PPh<sub>3</sub> (210.0 mg, 0.8 mmol, 4.0 equiv) and mesitylene (1.0 mL). The mixture was stirred at 180 °C for 12 h. After the completion of the reaction monitored by TLC (thin layer chromatography), the reaction mixture was cooled to the room temperature and concentrated by rotary evaporation.<sup>18</sup> The residue was fully loaded onto a silica gel column and eluted with petroleum ether/ethyl acetate (10:1 – 5:1) to afford compound **65** as a yellow solid (62.7 mg, 81% yield).

## 5.6 Synthesis of **66** and **67** from **3**

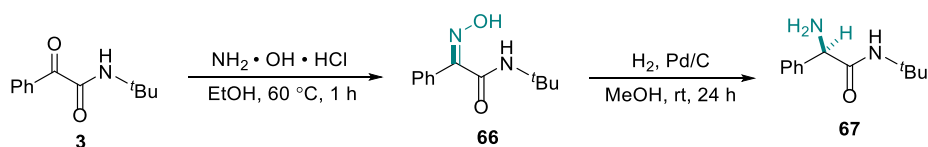

A 10 mL single-necked flask with a magnetic stir bar was charged with **3** (41.0 mg, 0.2 mmol, 1.0 equiv), hydroxylamine (22.2 mg, 0.32 mmol, 1.6 equiv) and dissolved in EtOH (1.0 mL) at 60 °C and stir for 1 h. After the completion of the reaction monitored by TLC (thin layer chromatography), the reaction mixture was cooled to the room temperature and concentrated by rotary evaporation to obtain a residue.<sup>19</sup> The residue was fully loaded onto a silica gel column and was eluted with petroleum ether/ethyl acetate (2:1) to give **66** as a white solid (41.8 mg, 95% yield).

A mixture of **66** (44.0 mg, 0.2 mmol, 1.0 equiv), Pd/C (50 mg), and MeOH (5.0 mL). The reaction was stirred at room temperature for 24 h under hydrogen atmosphere. After the completion of the reaction monitored by TLC (thin layer chromatography). Filter with diatomaceous earth, remove palladium-carbon, rinse with CH<sub>2</sub>Cl<sub>2</sub> (30 mL), incorporate organic phase and the solvent was concentrated by rotary evaporation to obtain a residue.<sup>20</sup> The residue was purified by flash column chromatography on silica gel and eluted with ethyl acetate to afford the product **67** as a white solid (37.1 mg, 90% yield).

## 5.7 Synthesis of **68** and **69** from **3**

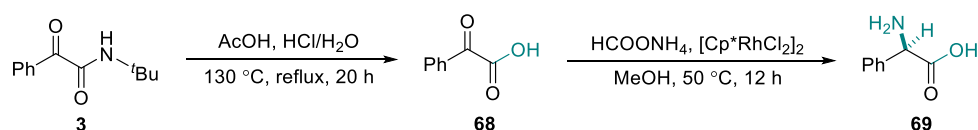

A 50 mL single-necked flask equipped with a stir bar and a reflux condenser was charged with **3** (41.0 mg, 0.2 mmol, 1.0 equiv), dissolved in AcOH (0.5 mL) and HCl/H<sub>2</sub>O (0.5 mL). Then the reaction mixture was stirred at 130 °C and reflux for 20 h. After the completion of the reaction monitored by TLC (thin layer chromatography), the reaction mixture was cooled to the room temperature, diluted with water (30 mL) and extracted with CH<sub>2</sub>Cl<sub>2</sub> (3 × 30 mL). The combined organic layers were washed with water (60 mL) and saturated NaHCO<sub>3</sub> solution (2 × 60 mL), dried over Na<sub>2</sub>SO<sub>4</sub>, filtered and concentrated.<sup>21</sup>

The residue was fully loaded onto a silica gel column and was eluted with dichloromethane/methyl alcohol (10:1 – 5:1) to give **68** as a white solid (29.4 mg, 98% yield).

A mixture of **68** (44.0 mg, 0.2 mmol, 1.0 equiv), HCOONH<sub>4</sub> (mg, 1.0 mol, 5.0 equiv), [Cp\*RhCl<sub>2</sub>]<sub>2</sub> (mg, 1% mol%), and dissolved in MeOH (1.0 mL). The reaction was stirred 50 °C for 12 h under argon atmosphere. After the completion of the reaction monitored by TLC (thin layer chromatography), the reaction mixture was cooled to the room temperature. Then, the reaction mixture was filtered and washed with methyl alcohol.<sup>22</sup> After drying, the product **69** was obtained as a white solid (24.3 mg, 80% yield).

### 5.8 Synthesis of **76** from **3**

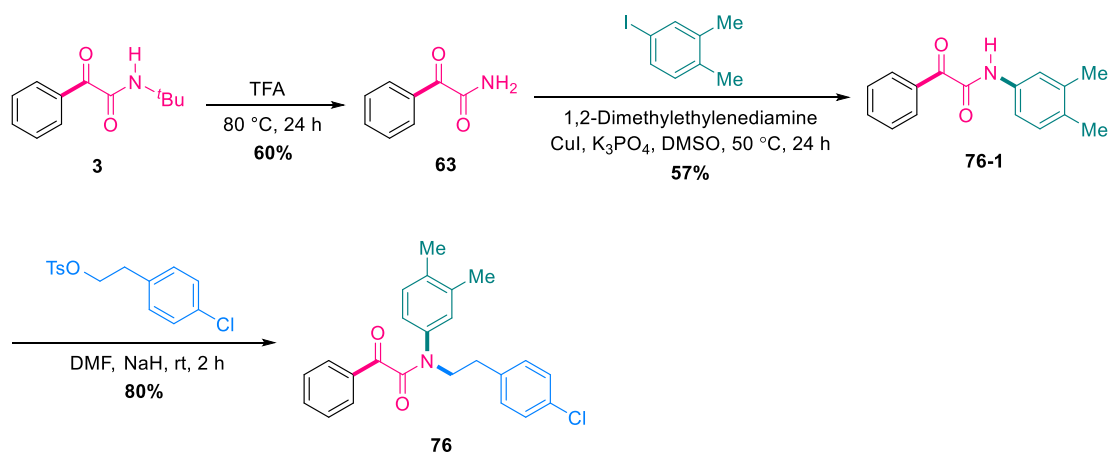

A 10-mL pressure tube with a magnetic stir bar was charged with **3** (41.0 mg, 0.2 mmol, 1.0 equiv) and trifluoroacetic acid (2.0 mL). The mixture was stirred at 80 °C for 24 h. After the completion of the reaction monitored by TLC (thin layer chromatography), the reaction mixture was diluted with water (30 mL) and extracted with CH<sub>2</sub>Cl<sub>2</sub> (3 × 30 mL). The combined organic layers were washed with water (60 mL) and saturated NaHCO<sub>3</sub> solution (2 × 60 mL), dried over Na<sub>2</sub>SO<sub>4</sub> and filtered.<sup>16</sup> The solvent was concentrated by rotary evaporation and the residue was fully loaded onto a silica gel column and eluted with petroleum ether/ethyl acetate (10:1 – 1:1) to afford compound **63** as a white solid (17.9 mg, 60% yield).

A mixture of **63** (29.8 mg, 0.2 mmol, 1.0 equiv), 4-iodo-1,2-dimethylbenzene (55.7 mg, 0.24 mmol, 1.2 equiv), 1,2-Dimethylethylenediamine (1.8 mg, 10 mol%), CuI (3.8 mg, 10 mol%), K<sub>3</sub>PO<sub>4</sub> (84.9 mg, 2.0 equiv) and DMSO (1.0 mL). The vial was evacuated and

backfilled with argon for three times and stirred at 50 °C for 24 h. After the completion of the reaction monitored by TLC (thin layer chromatography), the reaction mixture was cooled to the room temperature and treated with water (15 mL), extracted with CH<sub>2</sub>Cl<sub>2</sub> (3 × 15 mL), washed with brine (2 × 40 mL). Then the organic layer was dried over anhydrous Na<sub>2</sub>SO<sub>4</sub>, filtered and concentrated.<sup>17</sup> The residue was purified by flash column chromatography on silica gel and eluted with petroleum ether/ethyl acetate (10:1 – 5:1) to afford the product **76-1** as a yellow solid (28.9 mg, 57% yield).

A 10 mL single-necked flask with a magnetic stir bar was charged with **75-1** (50.6 mg, 0.2 mmol, 1.0 equiv) and dissolved in DMF (1.0 mL). Add NaH (5.8 mg, 0.24 mmol, 1.2 equiv) to the reaction mixture at 0 °C and stir for 10 min, then add 4-chlorophenethyl 4-methylbenzenesulfonate (74.4 mg, 0.24 mmol, 1.2 equiv). After the addition was completed, the reaction mixture was stirred at 0 °C for 10 min and then at room temperature for 2 h. After the completion of the reaction monitored by TLC (thin layer chromatography), the reaction mixture was treated with water (15 mL), extracted with CH<sub>2</sub>Cl<sub>2</sub> (3 × 15 mL), washed with brine (2 × 40 mL). Then the organic layer was dried over anhydrous Na<sub>2</sub>SO<sub>4</sub>, filtered and concentrated. The solvent was concentrated by rotary evaporation to obtain a residue. The residue was fully loaded onto a silica gel column and was eluted with petroleum ether/ethyl acetate (5:1) to give **76** as a white solid (62.6 mg, 80% yield).

### 5.9 Synthesis of **77** from **14**

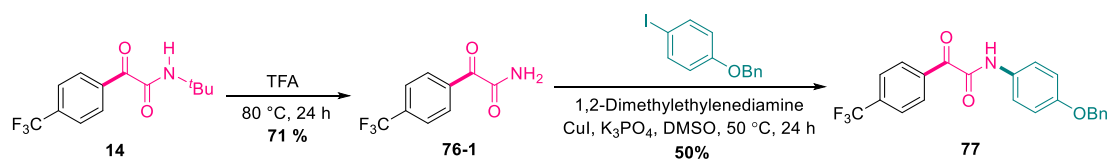

A 10-mL pressure tube with a magnetic stir bar was charged with **14** (54.6 mg, 0.2 mmol, 1.0 equiv) and trifluoroacetic acid (2.0 mL). The mixture was stirred at 80 °C for 24 h. After the completion of the reaction monitored by TLC (thin layer chromatography), the reaction mixture was diluted with water (30 mL) and extracted with CH<sub>2</sub>Cl<sub>2</sub> (3 × 30 mL). The combined organic layers were washed with water (60 mL) and saturated NaHCO<sub>3</sub> solution (2 × 60 mL), dried over Na<sub>2</sub>SO<sub>4</sub> and filtered.<sup>16</sup> The solvent was concentrated by rotary evaporation and the residue was fully loaded onto a silica gel column and eluted



with petroleum ether/ethyl acetate (10:1 – 1:1) to afford compound **77-1** as a white solid (30.8 mg, 71% yield).

A mixture of **77-1** (43.4 mg, 0.2 mmol, 1.0 equiv), 1-(benzyloxy)-4-iodobenzene (74.4 mg, 0.24 mmol, 1.2 equiv), 1,2-Dimethylethylenediamine (1.8 mg, 10 mol%), CuI (3.8 mg, 10 mol%), K<sub>3</sub>PO<sub>4</sub> (84.9 mg, 2.0 equiv) and DMSO (1.0 mL). The vial was evacuated and backfilled with argon for three times and stirred at 50 °C for 24 h. After the completion of the reaction monitored by TLC (thin layer chromatography), the reaction mixture was cooled to the room temperature and treated with water (15 mL), extracted with CH<sub>2</sub>Cl<sub>2</sub> (3 × 15 mL), washed with brine (2 × 40 mL). Then the organic layer was dried over anhydrous Na<sub>2</sub>SO<sub>4</sub>, filtered and concentrated.<sup>17</sup> The residue was purified by flash column chromatography on silica gel and eluted with petroleum ether/ethyl acetate (10:1 – 5:1) to afford the product **77** as a yellow solid (39.9 mg, 50% yield).

#### 5.10 Synthesis of **78** from **78-1**

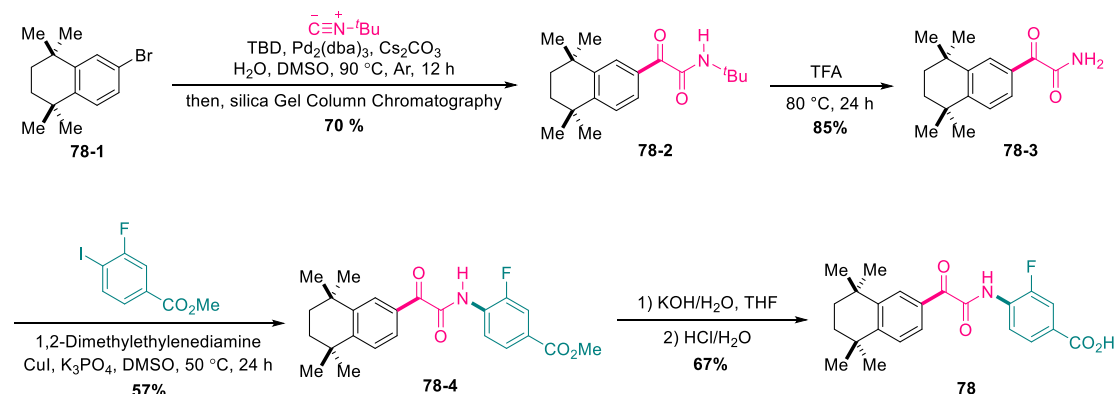

A 4-mL flame-dried vial with a magnetic stir bar was charged with **78-1** (53.2 mg, 0.2 mmol, 1.0 equiv), TBD (5.6 mg, 20 mol%), Pd<sub>2</sub>(dba)<sub>3</sub> (18.3 mg, 10 mol%), Cs<sub>2</sub>CO<sub>3</sub> (130.3 mg, 0.4 mmol, 2.0 equiv), H<sub>2</sub>O (100 µL) and extra dry DMSO (1.0 mL). The vial was evacuated and backfilled with argon for three times and then *tert*-butyl isocyanide (56.6 µL, 0.5 mmol) was added by syringe under argon. The vial was then sealed and was stirred at 90 °C (oil bath) for 12 h. After the completion of the reaction monitored by TLC (thin layer chromatography), the reaction mixture was cooled to the room temperature and treated with water (15 mL), extracted with CH<sub>2</sub>Cl<sub>2</sub> (3 × 15 mL), washed with brine (2 × 40 mL). Then the organic layer was dried over anhydrous Na<sub>2</sub>SO<sub>4</sub>, filtered and concentrated. The

residue was purified by flash column chromatography on silica gel and eluted with petroleum ether/ethyl acetate (30:1 – 10:1) to afford the product **78-2** (44.1 mg, 70% yield).

A 10-mL pressure tube with a magnetic stir bar was charged with **78-2** (63.0 mg, 0.2 mmol, 1.0 equiv) and trifluoroacetic acid (2.0 mL). The mixture was stirred at 80 °C for 24 h. After the completion of the reaction monitored by TLC (thin layer chromatography), the reaction mixture was diluted with water (30 mL) and extracted with CH<sub>2</sub>Cl<sub>2</sub> (3 × 30 mL). The combined organic layers were washed with water (60 mL) and saturated NaHCO<sub>3</sub> solution (2 × 60 mL), dried over Na<sub>2</sub>SO<sub>4</sub> and filtered.<sup>16</sup> The solvent was concentrated by rotary evaporation and the residue was fully loaded onto a silica gel column and eluted with petroleum ether/ethyl acetate (10:1 – 1:1) to afford compound **78-3** as a yellow solid (44.1 mg, 85% yield).

A mixture of **78-3** (51.8 mg, 0.2 mmol, 1.0 equiv), methyl 3-fluoro-4-iodobenzoate (67.2 mg, 0.24 mmol, 1.2 equiv), 1,2-Dimethylethylenediamine (1.8 mg, 10 mol%), CuI (3.8 mg, 10 mol%), K<sub>3</sub>PO<sub>4</sub> (84.9 mg, 2.0 equiv) and DMSO (1.0 mL). The vial was evacuated and backfilled with argon for three times and stirred at 50 °C for 24 h. After the completion of the reaction monitored by TLC (thin layer chromatography), the reaction mixture was cooled to the room temperature and treated with water (15 mL), extracted with CH<sub>2</sub>Cl<sub>2</sub> (3 × 15 mL), washed with brine (2 × 40 mL). Then the organic layer was dried over anhydrous Na<sub>2</sub>SO<sub>4</sub>, filtered and concentrated.<sup>17</sup> The residue was purified by flash column chromatography on silica gel and eluted with petroleum ether/ethyl acetate (10:1 – 5:1) to afford the product **78-4** as a yellow solid (46.9 mg, 57% yield).

A 50 mL single-necked flask with a magnetic stir bar was charged with **78-4** (82.2 mg, 0.2 mmol, 1.0 equiv), KOH (56.1 mg, 1.0 mmol, 5.0 equiv), dissolved in H<sub>2</sub>O (5.0 mL) and THF (5.0 mL). After the addition was completed, the reaction mixture was stirred at room temperature for 6 h. After the completion of the reaction monitored by TLC (thin layer chromatography), the reaction mixture was acidified with HCl/H<sub>2</sub>O (1.0 mol/L), a white precipitate can be observed. Then the reaction mixture was treated with water (15 mL), extracted with CH<sub>2</sub>Cl<sub>2</sub> (3 × 15 mL), and the organic layer was dried over anhydrous Na<sub>2</sub>SO<sub>4</sub>, filtered and concentrated. the solvent was concentrated by rotary evaporation to obtain a

residue. The residue was fully loaded onto a silica gel column and was eluted with petroleum ether/ethyl acetate (5:1) to give **78** as a white solid (53.4 mg, 67% yield).

### 5.11 Synthesis of **78** and **80**

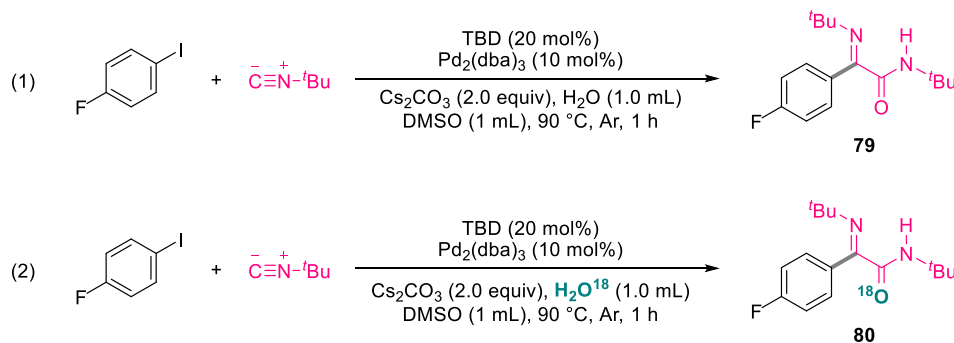

A 25-mL flame-dried flask with a magnetic stir bar was charged with 1-fluoro-4-iodobenzene (230.6  $\mu$ L, 2.0 mmol, 1.0 equiv), TBD (55.7 mg, 20 mol%),  $\text{Pd}_2(\text{dba})_3$  (183.0 mg, 10 mol%),  $\text{Cs}_2\text{CO}_3$  (1303.3 mg, 4.0 mmol, 2.0 equiv),  $\text{H}_2\text{O}$  (1.0 mL) and extra dry DMSO (5.0 mL). The flask was evacuated and backfilled with argon for three times and then *tert*-butyl isocyanide (565.5  $\mu$ L, 5.0 mmol, 2.5 equiv) was added by syringe under argon. The flask was then sealed and was stirred at 90  $^\circ\text{C}$  (oil bath) for 1 h. After the completion of the reaction monitored by TLC (thin layer chromatography), the reaction mixture was cooled to the room temperature and treated with water (50 mL), extracted with  $\text{CH}_2\text{Cl}_2$  (3  $\times$  50 mL), washed with brine (2  $\times$  150 mL). Then the organic layer was dried over anhydrous  $\text{Na}_2\text{SO}_4$ , filtered and concentrated. The residue was recrystallization with petroleum ether and dichloromethane. Finally, the product **79** was obtained as a yellow solid (323.6 mg, 58% yield by recrystallization). Product **80** was synthesized following these procedures.

### 5.12 Synthesis of **81**

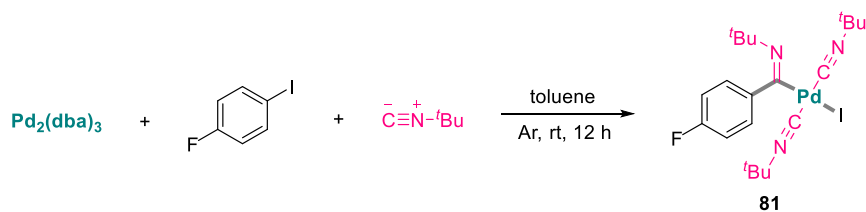

A 10-mL flame-dried flask with a magnetic stir bar was charged with  $\text{Pd}_2(\text{dba})_3$  (91.5

mg, 0.1 mmol, 1.0 equiv), 1-fluoro-4-iodobenzene (46.1  $\mu$ L, 0.4 mmol, 4.0 equiv), dissolved in dry toluene (1.0 mL), and the flask was evacuated and backfilled with argon for three times and then *tert*-butyl isocyanide (90.5  $\mu$ L, 0.8 mmol, 8.0 equiv) was added by syringe under argon. After the addition was completed, the flask was sealed and was stirred at room temperature for 12 h. After the completion of the reaction monitored by TLC (thin layer chromatography), the reaction concentrated by rotary evaporation to obtain a residue.<sup>23</sup> The residue was fully loaded onto a silica gel column and was eluted with petroleum ether/ethyl acetate (10:1 – 3:1) to give the compound **81** as a yellow solid (57.7 mg, 50% yield).

## 6. Characterization data of 3-81

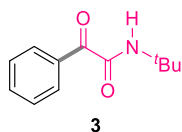

***N*-(*tert*-butyl)-2-oxo-2-phenylacetamide (3).** Yellow solid, 33.2 mg, 81% yield (From bromobenzene); 14.8 mg, 36% yield (From phenyl trifluoromethanesulfonate); 38.2 mg, 93% yield (From iodobenzene), m.p. = 72.8 – 74.3 °C. **<sup>1</sup>H-NMR** (CDCl<sub>3</sub>, 400 MHz): δ 8.29 (d, *J* = 7.2 Hz, 2H), 7.60 (t, *J* = 7.4 Hz, 1H), 7.46 (t, *J* = 7.7 Hz, 2H), 6.94 (br s, 1H), 1.45 (s, 9H); **<sup>13</sup>C-NMR** (CDCl<sub>3</sub>, 101 MHz): δ 188.7, 161.2, 134.3, 133.5, 131.3, 128.5, 51.8, 28.5; **HRMS** (ESI-Orbitrap): calcd. for [C<sub>12</sub>H<sub>16</sub>NO<sub>2</sub>]<sup>+</sup> (*M* + *H*<sup>+</sup>): 206.1176, found: 206.1173.

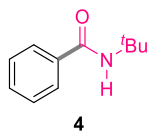

***N*-(*tert*-butyl)benzamide (4).** White solid, 26.2 mg, 74% yield (From bromobenzene), m.p. = 130.4 – 131.3 °C. **<sup>1</sup>H-NMR** (CDCl<sub>3</sub>, 400 MHz): δ 7.65 (d, *J* = 7.3 Hz, 2H), 7.35 (t, *J* = 7.3 Hz, 1H), 7.28 (t, *J* = 7.4 Hz, 2H), 6.18 (br s, 1H), 1.39 (s, 9H); **<sup>13</sup>C-NMR** (CDCl<sub>3</sub>, 101 MHz): δ 166.9, 135.7, 130.9, 128.2, 126.7, 51.4, 28.7; **HRMS** (ESI-Orbitrap): calcd. for [C<sub>11</sub>H<sub>16</sub>NO]<sup>+</sup> (*M* + *H*<sup>+</sup>): 178.1226, found: 178.1226.

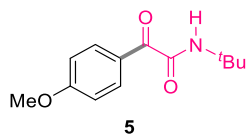

***N*-(*tert*-butyl)-2-(4-methoxyphenyl)-2-oxoacetamide (5).** White solid, 38.6 mg, 82% yield (From 1-bromo-4-methoxybenzene); 30.1 mg, 64% yield (From 1-iodo-4-methoxybenzene), m.p. = 60.3 – 62.9 °C. **<sup>1</sup>H-NMR** (CDCl<sub>3</sub>, 400 MHz): δ 8.36 (d, *J* = 9.0 Hz, 2H), 6.98 (br s, 1H), 6.91 (d, *J* = 9.0 Hz, 2H), 3.86 (s, 3H), 1.43 (s, 9H); **<sup>13</sup>C-NMR** (CDCl<sub>3</sub>, 101 MHz): δ 186.6, 164.6, 161.8, 134.0, 126.5, 113.8, 55.6, 51.6, 28.5; **HRMS** (ESI-Orbitrap): calcd. for [C<sub>13</sub>H<sub>17</sub>NNaO<sub>3</sub>]<sup>+</sup> (*M* + Na<sup>+</sup>): 258.1101, found: 258.1101.

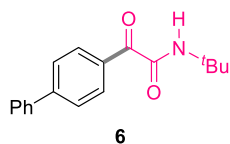

**2-([1,1'-biphenyl]-4-yl)-N-(tert-butyl)-2-oxoacetamide (6).** Yellow solid, 41.6 mg, 74% yield, (From 4-bromo-1,1'-biphenyl); 11.8 mg, 21% yield ([1,1'-biphenyl]-4-yl trifluoromethanesulfonate); 41.6 mg, 74% yield (From 4-iodo-1,1'-biphenyl), m.p. = 130.0 – 131.9 °C. **<sup>1</sup>H-NMR** (CDCl<sub>3</sub>, 400 MHz): δ 8.41 (d, *J* = 8.5 Hz, 2H), 7.68 (d, *J* = 8.5 Hz, 2H), 7.63 (d, *J* = 7.2 Hz, 2H), 7.47 (t, *J* = 7.4 Hz, 2H), 7.40 (t, *J* = 7.3 Hz, 1H), 7.02 (br s, 1H), 1.48 (s, 9H); **<sup>13</sup>C-NMR** (CDCl<sub>3</sub>, 101 MHz): δ 188.0, 161.3, 146.8, 139.8, 132.2, 131.9, 129.0, 128.5, 127.4, 127.1, 51.7, 28.5; **HRMS** (ESI-Orbitrap): calcd. for [C<sub>18</sub>H<sub>19</sub>NNaO<sub>2</sub>]<sup>+</sup> (M + Na<sup>+</sup>): 304.1308, found: 304.1301.

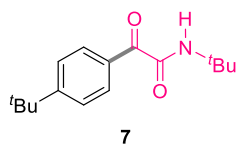

**N-(tert-butyl)-2-(4-(tert-butyl)phenyl)-2-oxoacetamide (7).** Yellow solid, 43.4 mg, 83% yield, (From 1-bromo-4-(tert-butyl)benzene); 10.4 mg, 20% yield (4-(tert-butyl)phenyl trifluoromethanesulfonate); 44.9 mg, 86% yield (From 1-(tert-butyl)-4-iodobenzene), m.p. = 73.3 – 74.2 °C. **<sup>1</sup>H-NMR** (CDCl<sub>3</sub>, 400 MHz): δ 8.23 (d, *J* = 8.7 Hz, 2H), 7.46 (d, *J* = 8.7 Hz, 2H), 6.94 (br s, 1H), 1.44 (s, 9H), 1.32 (s, 9H); **<sup>13</sup>C-NMR** (CDCl<sub>3</sub>, 101 MHz): δ 188.3, 161.5, 158.1, 131.3, 130.9, 125.5, 51.7, 35.3, 31.1, 28.5; **HRMS** (ESI-Orbitrap): calcd. for [C<sub>16</sub>H<sub>24</sub>NO<sub>2</sub>]<sup>+</sup> (M + H<sup>+</sup>): 262.1802, found: 262.1801.

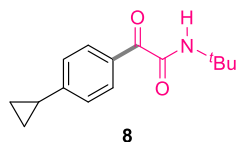

**N-(tert-butyl)-2-(4-cyclopropylphenyl)-2-oxoacetamide (8).** Yellow solid, 25.5 mg, 52% yield (From 1-bromo-4-cyclopropylbenzene), m.p. = 77.6 – 79.1 °C. **<sup>1</sup>H-NMR** (CDCl<sub>3</sub>, 400 MHz): δ 8.21 (d, *J* = 8.3 Hz, 2H), 7.09 (d, *J* = 8.3 Hz, 2H), 6.95 (br s, 1H), 2.01 – 1.85 (m, 1H), 1.43 (s, 9H), 1.13 – 0.99 (m, 2H), 0.85 – 0.72 (m, 2H); **<sup>13</sup>C-NMR** (CDCl<sub>3</sub>, 101 MHz): δ

187.9, 161.6, 152.0, 131.5, 130.7, 125.3, 51.7, 28.5, 16.1, 10.9; **HRMS** (ESI-Orbitrap): calcd. for  $[C_{15}H_{20}NO_2]^+$  ( $M + H^+$ ): 246.1489, found: 246.1489.

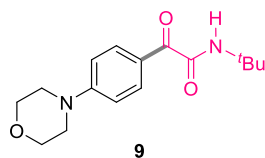

***N*-(*tert*-butyl)-2-(4-morpholinophenyl)-2-oxoacetamide (9).** Yellow solid, 45.8 mg, 79% yield (From 4-(4-bromophenyl)morpholine), m.p. = 90.9 – 92.3 °C. **<sup>1</sup>H-NMR** ( $CDCl_3$ , 400 MHz):  $\delta$  8.33 (d,  $J$  = 9.1 Hz, 2H), 7.01 (br s, 1H), 6.82 (d,  $J$  = 9.1 Hz, 2H), 3.82 (t, 4H), 3.33 (t, 4H), 1.42 (s, 9H); **<sup>13</sup>C-NMR** ( $CDCl_3$ , 101 MHz):  $\delta$  185.7, 162.3, 154.9, 133.8, 123.8, 112.8, 66.5, 51.5, 47.1, 28.5; **HRMS** (ESI-Orbitrap): calcd. for  $[C_{16}H_{23}N_2O_3]^+$  ( $M + H^+$ ): 291.1703, found: 291.1706.

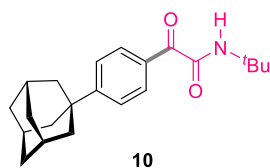

**2-(4-((1*S*,3*R*,5*S*,7*S*)-adamantan-1-yl)phenyl)-*N*-(*tert*-butyl)-2-oxoacetamide (10).** Yellow solid, 34.6 mg, 51% yield (From (1*S*,3*R*,5*S*,7*S*)-1-(4-bromophenyl)adamantane), m.p. = 134.9 – 136.7 °C. **<sup>1</sup>H-NMR** ( $CDCl_3$ , 400 MHz):  $\delta$  8.25 (d,  $J$  = 8.5 Hz, 2H), 7.44 (d,  $J$  = 8.6 Hz, 2H), 6.96 (br s, 1H), 2.10 (s, 3H), 1.90 (s, 6H), 1.76 (q,  $J$  = 12.4 Hz, 6H), 1.44 (s, 9H); **<sup>13</sup>C-NMR** ( $CDCl_3$ , 101 MHz):  $\delta$  188.2, 161.5, 158.2, 131.3, 130.8, 125.1, 51.6, 42.8, 36.9, 36.7, 28.8, 28.4; **HRMS** (ESI-Orbitrap): calcd. for  $[C_{22}H_{30}NO_2]^+$  ( $M + H^+$ ): 340.2271, found: 340.2273.

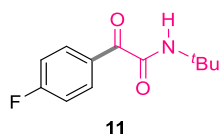

***N*-(*tert*-butyl)-2-(4-fluorophenyl)-2-oxoacetamide (11).** White solid, 33.5 mg, 75% yield (From 1-bromo-4-fluorobenzene); 9.4 mg, 21% yield (From 4-fluorophenyl trifluoromethanesulfonate); 43.7 mg, 98% yield (From 1-fluoro-4-iodobenzene), m.p. = 48.4

– 49.3 °C. **<sup>1</sup>H-NMR** (CDCl<sub>3</sub>, 400 MHz): δ 8.43 – 8.31 (m, 2H), 7.10 (t, *J* = 8.7 Hz, 2H), 6.99 (br s, 1H), 1.42 (s, 9H); **<sup>13</sup>C-NMR** (CDCl<sub>3</sub>, 101 MHz): δ 186.7, 166.5 (d, *J* = 257.2 Hz), 161.0, 134.3 (d, *J* = 9.6 Hz), 129.8 (d, *J* = 3.0 Hz), 115.7 (d, *J* = 21.8 Hz), 51.8, 28.4; **<sup>19</sup>F NMR** (CDCl<sub>3</sub>, 376 MHz) δ -99.04 – -106.36 (m); **HRMS** (ESI-Orbitrap): calcd. for [C<sub>12</sub>H<sub>15</sub>FNO<sub>2</sub>]<sup>+</sup> (M + H<sup>+</sup>): 224.1081, found: 224.1090.

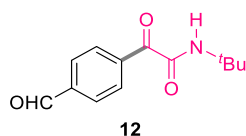

***N*-(*tert*-butyl)-2-(4-formylphenyl)-2-oxoacetamide (12).** Yellow solid, 39.2 mg, 84% yield (From 4-bromobenzaldehyde); 40.1 mg, 86% yield (From 4-iodobenzaldehyde), m.p. = 28.5 – 30.4 °C. **<sup>1</sup>H-NMR** (CDCl<sub>3</sub>, 400 MHz): δ 10.06 (s, 1H), 8.38 (d, *J* = 8.2 Hz, 2H), 7.91 (d, *J* = 8.5 Hz, 2H), 6.98 (br s, 1H), 1.42 (s, 9H); **<sup>13</sup>C-NMR** (CDCl<sub>3</sub>, 101 MHz): δ 191.8, 188.0, 160.4, 139.4, 137.8, 131.7, 129.3, 51.9, 28.4; **HRMS** (ESI-Orbitrap): calcd. for [C<sub>13</sub>H<sub>16</sub>NO<sub>3</sub>]<sup>+</sup> (M + H<sup>+</sup>): 234.1125, found: 234.1123.

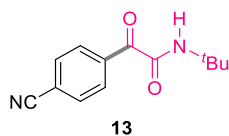

***N*-(*tert*-butyl)-2-(4-cyanophenyl)-2-oxoacetamide (13).** Yellow solid, 40.0 mg, 87% yield (From 4-bromobenzonitrile); 41.0 mg, 89% yield (From 4-iodobenzonitrile), m.p. = 108.8 – 110.3 °C. **<sup>1</sup>H-NMR** (CDCl<sub>3</sub>, 400 MHz): δ 8.37 (d, *J* = 8.5 Hz, 2H), 7.73 (d, *J* = 8.5 Hz, 2H), 6.97 (br s, 1H), 1.42 (s, 9H); **<sup>13</sup>C-NMR** (CDCl<sub>3</sub>, 101 MHz): δ 187.2, 160.0, 136.6, 132.1, 131.6, 117.9, 117.1, 52.0, 28.3; **HRMS** (ESI-Orbitrap): calcd. for [C<sub>13</sub>H<sub>15</sub>N<sub>2</sub>O<sub>2</sub>]<sup>+</sup> (M + H<sup>+</sup>): 231.1128, found: 231.1124.



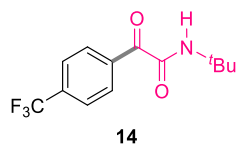

***N*-(*tert*-butyl)-2-oxo-2-(4-(trifluoromethyl)phenyl)acetamide (14).** White solid, 41.5 mg, 76% yield (From 1-bromo-4-(trifluoromethyl)benzene); 14.2 mg, 26% yield (From 4-(trifluoromethyl)phenyl trifluoromethanesulfonate); 48.1 mg, 88% yield (From 1-iodo-4-(trifluoromethyl)benzene), m.p. = 83.9 – 85.9°C. **<sup>1</sup>H-NMR** (CDCl<sub>3</sub>, 400 MHz): δ 8.39 (d, *J* = 8.1 Hz, 2H), 7.70 (d, *J* = 8.3 Hz, 2H), 6.99 (br s, 1H), 1.44 (s, 9H); **<sup>13</sup>C-NMR** (CDCl<sub>3</sub>, 101 MHz): δ 187.6, 160.4, 136.2 (d, *J* = 1.1 Hz), 135.1 (q, *J* = 32.7 Hz), 131.6, 125.4 (q, *J* = 3.7 Hz), 123.6 (q, *J* = 272.9 Hz), 52.0, 28.4; **HRMS** (ESI-Orbitrap): calcd. for [C<sub>13</sub>H<sub>15</sub>F<sub>3</sub>NO<sub>2</sub>]<sup>+</sup> (*M* + H<sup>+</sup>): 274.1049, found: 274.1051.

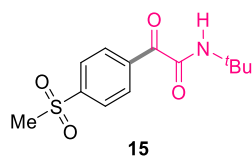

***N*-(*tert*-butyl)-2-(4-(methylsulfonyl)phenyl)-2-oxoacetamide (15).** Yellow solid, 34.5 mg, 61% yield (From 1-bromo-4-(methylsulfonyl)benzene), m.p. = 122.4 – 124.5 °C. **<sup>1</sup>H-NMR** (CDCl<sub>3</sub>, 400 MHz): δ 8.45 (d, *J* = 8.7 Hz, 2H), 8.03 (d, *J* = 8.7 Hz, 2H), 6.99 (br s, 1H), 3.07 (s, 3H), 1.45 (s, 9H); **<sup>13</sup>C-NMR** (CDCl<sub>3</sub>, 101 MHz): δ 187.5, 160.0, 144.7, 137.6, 132.1, 127.4, 52.1, 44.4, 28.4; **HRMS** (ESI-Orbitrap): calcd. for [C<sub>13</sub>H<sub>18</sub>NO<sub>4</sub>S]<sup>+</sup> (*M* + H<sup>+</sup>): 284.0951, found: 284.0956.

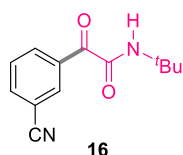

***N*-(*tert*-butyl)-2-(3-cyanophenyl)-2-oxoacetamide (16).** Yellow solid, 30.4 mg, 66% yield (From 3-bromobenzonitrile); 40.5 mg, 88% yield (From 3-iodobenzonitrile), m.p. = 70.3 – 71.2 °C. **<sup>1</sup>H-NMR** (CDCl<sub>3</sub>, 400 MHz): δ 8.63 (s, 1H), 8.49 (d, *J* = 8.0 Hz, 1H), 7.83 (d, *J* =

7.8 Hz, 1H), 7.57 (t,  $J = 7.9$  Hz, 1H), 7.00 (br s, 1H), 1.42 (s, 9H);  **$^{13}\text{C-NMR}$**  ( $\text{CDCl}_3$ , 101 MHz):  $\delta$  186.3, 160.0, 136.8, 135.1, 135.0, 134.2, 129.4, 117.8, 112.9, 52.0, 28.3; **HRMS** (ESI-Orbitrap): calcd. for  $[\text{C}_{13}\text{H}_{15}\text{N}_2\text{O}_2]^+$  ( $M + \text{H}^+$ ): 231.1128, found: 231.1122.

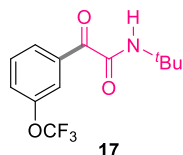

***N*-(*tert*-butyl)-2-oxo-2-(3-(trifluoromethoxy)phenyl)acetamide (17).** Yellow oil, 42.8 mg, 74% yield (From 1-bromo-3-(trifluoromethoxy)benzene); 47.4 mg, 82% yield (From 1-iodo-3-(trifluoromethoxy)benzene).  **$^1\text{H-NMR}$**  ( $\text{CDCl}_3$ , 400 MHz):  $\delta$  8.27 (d,  $J = 7.6$  Hz, 1H), 8.17 (s, 1H), 7.49 (dd,  $J = 11.9, 3.9$  Hz, 1H), 7.43 (d,  $J = 8.3$  Hz, 1H), 6.98 (br s, 1H), 1.43 (s, 9H);  **$^{13}\text{C-NMR}$**  ( $\text{CDCl}_3$ , 101 MHz):  $\delta$  187.0, 160.5, 149.2 (q,  $J = 1.9$  Hz), 135.2, 130.0, 129.8, 126.6, 123.6 (d,  $J = 0.6$  Hz), 120.5 (q,  $J = 258.0$  Hz), 51.9, 28.4; **HRMS** (ESI-Orbitrap): calcd. for  $[\text{C}_{13}\text{H}_{15}\text{F}_3\text{NO}_3]^+$  ( $M + \text{H}^+$ ): 290.0999, found: 290.0999.

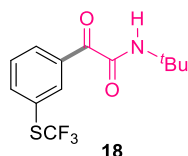

***N*-(*tert*-butyl)-2-oxo-2-(3-((trifluoromethyl)thio)phenyl)acetamide (18).** Yellow oil, 50.0 mg, 82% yield (From (3-bromophenyl)(trifluoromethyl)sulfane).  **$^1\text{H-NMR}$**  ( $\text{CDCl}_3$ , 400 MHz):  $\delta$  8.59 (s, 1H), 8.46 (d,  $J = 7.9$  Hz, 1H), 7.88 (d,  $J = 7.7$  Hz, 1H), 7.54 (t,  $J = 7.8$  Hz, 1H), 6.99 (br s, 1H), 1.45 (s, 9H);  **$^{13}\text{C-NMR}$**  ( $\text{CDCl}_3$ , 101 MHz):  $\delta$  187.2, 160.4, 141.5, 138.9, 134.8, 133.7, 129.7, 129.5 (q,  $J = 308.2$  Hz), 125.3 (q,  $J = 2.2$  Hz), 52.0, 28.5; **HRMS** (ESI-Orbitrap): calcd. for  $[\text{C}_{13}\text{H}_{15}\text{F}_3\text{NO}_2\text{S}]^+$  ( $M + \text{H}^+$ ): 306.0770, found: 306.0773.

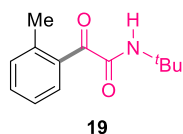

***N*-(*tert*-butyl)-2-oxo-2-(*o*-tolyl)acetamide (19).** Yellow solid, 21.9 mg, 50% yield (From 1-bromo-2-methylbenzene), 28.0 mg, 64% yield (From 1-iodo-2-methylbenzene), m.p. = 56.0 – 57.2 °C. **<sup>1</sup>H-NMR** (CDCl<sub>3</sub>, 400 MHz): δ 7.85 (d, *J* = 7.9 Hz, 1H), 7.40 (t, *J* = 7.5 Hz, 1H), 7.25 (t, *J* = 7.8 Hz, 2H), 6.92 (br s, 1H), 2.46 (s, 3H), 1.44 (s, 9H); **<sup>13</sup>C-NMR** (CDCl<sub>3</sub>, 101 MHz): δ 192.4, 161.3, 139.8, 133.0, 132.5, 131.8, 131.6, 125.3, 51.7, 28.4, 20.8; **HRMS** (ESI-Orbitrap): calcd. for [C<sub>13</sub>H<sub>17</sub>NNaO<sub>2</sub>]<sup>+</sup> (*M* + Na<sup>+</sup>): 242.1151, found: 242.1152.

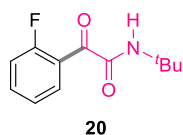

***N*-(*tert*-butyl)-2-(2-fluorophenyl)-2-oxoacetamide (20).** Yellow solid, 39.3 mg, 88% yield (From 1-bromo-2-fluorobenzene), 30.8 mg, 69% yield (From 1-fluoro-2-iodobenzene), m.p. = 63.6 – 64.8 °C. **<sup>1</sup>H-NMR** (CDCl<sub>3</sub>, 400 MHz): δ 7.84 (t, *J* = 6.7 Hz, 1H), 7.53 (dd, *J* = 13.1, 6.2 Hz, 1H), 7.21 (t, *J* = 7.6 Hz, 1H), 7.11 (t, 1H), 6.74 (br s, 1H), 1.43 (s, 9H); **<sup>13</sup>C-NMR** (CDCl<sub>3</sub>, 101 MHz): δ 188.9, 161.8 (d, *J* = 257.8 Hz), 160.8, 135.1 (d, *J* = 9.0 Hz), 132.0 (d, *J* = 1.6 Hz), 124.1 (d, *J* = 3.7 Hz), 123.0 (d, *J* = 11.6 Hz), 116.5 (d, *J* = 21.6 Hz), 51.9, 28.4; **HRMS** (ESI-Orbitrap): calcd. for [C<sub>12</sub>H<sub>15</sub>FNO<sub>2</sub>]<sup>+</sup> (*M* + H<sup>+</sup>): 224.1081, found: 224.1085.

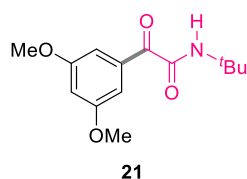

***N*-(*tert*-butyl)-2-(3,5-dimethoxyphenyl)-2-oxoacetamide (21).** Yellow solid, 45.1 mg, 85% yield (From 1-bromo-3,5-dimethoxybenzene); 42.4 mg, 80% yield (From 1-iodo-3,5-dimethoxybenzene), m.p. = 61.4 – 62.4 °C. **<sup>1</sup>H-NMR** (CDCl<sub>3</sub>, 400 MHz): δ 7.42 (dd, *J* = 2.3, 1.5 Hz, 2H), 6.90 (br s, 1H), 6.65 (td, *J* = 2.3, 1.1 Hz, 1H), 3.79 (d, *J* = 0.9 Hz, 6H), 1.42 (s, 9H); **<sup>13</sup>C-NMR** (CDCl<sub>3</sub>, 101 MHz): δ 188.1, 161.3, 160.5, 134.9, 108.6, 107.3, 55.6, 51.7, 28.4; **HRMS** (ESI-Orbitrap): calcd. for [C<sub>14</sub>H<sub>20</sub>NO<sub>4</sub>]<sup>+</sup> (*M* + H<sup>+</sup>): 266.1387, found: 266.1385.

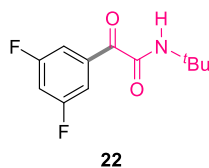

***N*-(*tert*-butyl)-2-(3,5-difluorophenyl)-2-oxoacetamide (22).** Yellow oil, 33.8 mg, 70% yield (From 1-bromo-3,5-difluorobenzene); 39.1 mg, 81% yield (From 1,3-difluoro-5-iodobenzene). **<sup>1</sup>H-NMR** (CDCl<sub>3</sub>, 400 MHz):  $\delta$  7.93 – 7.83 (m, 2H), 7.04 (tt,  $J$  = 8.4, 2.4 Hz, 1H), 6.96 (br s, 1H), 1.44 (s, 9H); **<sup>13</sup>C-NMR** (CDCl<sub>3</sub>, 101 MHz):  $\delta$  185.9 (t,  $J$  = 2.6 Hz), 162.7 (d,  $J$  = 250.3 Hz), 62.6 (d,  $J$  = 250.3 Hz), 160.1, 135.9 (t,  $J$  = 8.6 Hz), 114.4 (d,  $J$  = 7.5 Hz), 114.2 (d,  $J$  = 7.4 Hz), 109.6 (t,  $J$  = 25.3 Hz), 52.0, 28.4; **HRMS** (ESI-Orbitrap): calcd. for [C<sub>12</sub>H<sub>14</sub>FN<sub>2</sub>O<sub>2</sub>]<sup>+</sup> (M + H<sup>+</sup>): 242.0987, found: 242.0988.

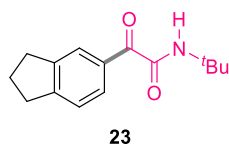

***N*-(*tert*-butyl)-2-(2,3-dihydro-1*H*-inden-5-yl)-2-oxoacetamide (23).** Yellow solid, 29.9 mg, 61% yield (From 5-bromo-2,3-dihydro-1*H*-indene), m.p. = 93.8 – 96.6 °C. **<sup>1</sup>H-NMR** (CDCl<sub>3</sub>, 400 MHz):  $\delta$  8.17 (s, 1H), 8.09 (d,  $J$  = 8.0 Hz, 1H), 7.29 (d,  $J$  = 7.8 Hz, 1H), 6.94 (br s, 1H), 2.94 (t,  $J$  = 7.5 Hz, 4H), 2.10 (p,  $J$  = 7.5 Hz, 2H), 1.45 (s, 9H); **<sup>13</sup>C-NMR** (CDCl<sub>3</sub>, 101 MHz):  $\delta$  188.6, 161.7, 151.9, 144.7, 131.8, 129.9, 127.2, 124.4, 51.7, 33.3, 32.6, 28.5, 25.4; **HRMS** (ESI-Orbitrap): calcd. for [C<sub>15</sub>H<sub>20</sub>NO<sub>2</sub>]<sup>+</sup> (M + H<sup>+</sup>): 246.1489, found: 246.1489.

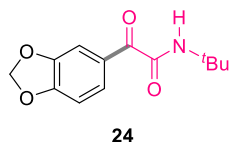

**2-(benzo[d][1,3]dioxol-5-yl)-*N*-(*tert*-butyl)-2-oxoacetamide (24).** Yellow solid, 38.9 mg, 78% yield (From 5-bromobenzo[d][1,3]dioxole); 19.9 mg, 40% yield (From benzo[d][1,3]dioxol-5-yl trifluoromethanesulfonate); 41.4 mg, 83% yield (From 5-iodobenzo[d][1,3]dioxole), m.p. = 27.1 – 29.2 °C. **<sup>1</sup>H-NMR** (CDCl<sub>3</sub>, 400 MHz):  $\delta$  8.10 (d,  $J$  = 8.3 Hz, 1H), 7.71 (s, 1H), 6.95 (br s, 1H), 6.82 (d,  $J$  = 8.3 Hz, 1H), 6.01 (s, 2H), 1.41 (s, 9H); **<sup>13</sup>C-NMR** (CDCl<sub>3</sub>, 101 MHz):  $\delta$  186.2, 161.6, 152.9, 147.9, 129.0, 127.9, 110.4, 108.0,

102.0, 51.6, 28.4; **HRMS** (ESI-Orbitrap): calcd. for  $[C_{13}H_{16}NO_4]^+$  ( $M + H^+$ ): 250.1074, found: 250.1071.

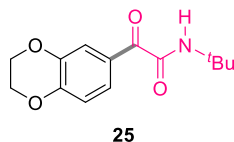

***N*-(*tert*-butyl)-2-(2,3-dihydrobenzo[*b*][1,4]dioxin-6-yl)-2-oxoacetamide (25).** Yellow oil, 36.8 mg, 70% yield (From 6-bromo-2,3-dihydrobenzo[*b*][1,4]dioxine). **<sup>1</sup>H-NMR** ( $CDCl_3$ , 400 MHz):  $\delta$  7.93 (dd,  $J = 8.5, 2.0$  Hz, 1H), 7.89 (d,  $J = 1.9$  Hz, 1H), 6.92 (br s, 1H), 6.88 (d,  $J = 8.5$  Hz, 1H), 4.36 – 4.21 (m, 4H), 1.42 (s, 9H); **<sup>13</sup>C-NMR** ( $CDCl_3$ , 101 MHz):  $\delta$  186.7, 161.6, 149.4, 143.3, 127.1, 126.1, 120.9, 117.3, 65.0, 64.1, 51.7, 28.5; **HRMS** (ESI-Orbitrap): calcd. for  $[C_{14}H_{18}NO_4]^+$  ( $M + H^+$ ): 264.1230, found: 264.1240.

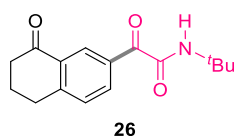

***N*-(*tert*-butyl)-2-oxo-2-(8-oxo-5,6,7,8-tetrahydronaphthalen-2-yl)acetamide (26).** Yellow solid, 29.5 mg, 54% yield (From 7-bromo-3,4-dihydronaphthalen-1(2*H*)-one), m.p. = 39.8 – 41.7 °C. **<sup>1</sup>H-NMR** ( $CDCl_3$ , 400 MHz):  $\delta$  8.88 (s, 1H), 8.42 (dd,  $J = 8.0, 1.7$  Hz, 1H), 7.35 (d,  $J = 8.1$  Hz, 1H), 6.95 (br s, 1H), 3.02 (t,  $J = 6.0$  Hz, 2H), 2.69 (t, 2H), 2.21 – 2.11 (m, 2H), 1.45 (s, 9H); **<sup>13</sup>C-NMR** ( $CDCl_3$ , 101 MHz):  $\delta$  197.3, 187.7, 160.7, 150.5, 135.4, 132.7, 132.3, 130.6, 129.2, 51.9, 39.1, 30.1, 28.5, 22.8; **HRMS** (ESI-Orbitrap): calcd. for  $[C_{16}H_{20}NO_3]^+$  ( $M + H^+$ ): 274.1438, found: 274.1438.

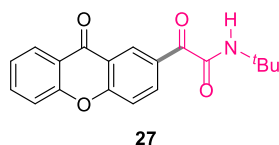

***N*-(*tert*-butyl)-2-oxo-2-(9-oxo-9*H*-xanthen-2-yl)acetamide (27).** Yellow solid, 50.4 mg, 78% yield (From 2-bromo-9*H*-xanthen-9-one), m.p. = 130.0 – 132.3 °C. **<sup>1</sup>H-NMR** ( $CDCl_3$ , 400 MHz):  $\delta$  9.27 (d,  $J = 2.0$  Hz, 1H), 8.67 (dd,  $J = 8.9, 2.2$  Hz, 1H), 8.31 (dd,  $J = 8.0, 1.4$

Hz, 1H), 7.73 (t,  $J = 7.0$  Hz, 1H), 7.53 – 7.46 (m, 2H), 7.40 (t,  $J = 7.1$  Hz, 1H), 7.04 (br s, 1H), 1.47 (s, 9H);  $^{13}\text{C-NMR}$  ( $\text{CDCl}_3$ , 101 MHz):  $\delta$  186.6, 176.4, 160.8, 159.4, 155.9, 136.9, 135.4, 131.9, 129.3, 127.0, 124.8, 121.9, 121.5, 118.4, 118.2, 51.9, 28.5; **HRMS** (ESI-Orbitrap): calcd. for  $[\text{C}_{19}\text{H}_{18}\text{NO}_4]^+$  ( $M + \text{H}^+$ ): 324.1230, found: 324.1230.

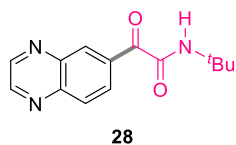

***N*-(*tert*-butyl)-2-oxo-2-(quinoxalin-6-yl)acetamide (28).** Yellow solid, 26.7 mg, 52% yield (From 6-bromoquinoxaline), m.p. = 87.4 – 89.2 °C.  $^1\text{H-NMR}$  ( $\text{CDCl}_3$ , 400 MHz):  $\delta$  9.20 (d,  $J = 1.5$  Hz, 1H), 8.92 (d,  $J = 4.6$  Hz, 2H), 8.47 (dd,  $J = 8.8, 1.8$  Hz, 1H), 8.14 (d,  $J = 8.8$  Hz, 1H), 7.00 (br s, 1H), 1.48 (s, 9H);  $^{13}\text{C-NMR}$  ( $\text{CDCl}_3$ , 101 MHz):  $\delta$  188.0, 160.6, 147.1, 146.2, 145.5, 142.3, 135.2, 134.2, 130.1, 129.9, 52.0, 28.5; **HRMS** (ESI-Orbitrap): calcd. for  $[\text{C}_{14}\text{H}_{16}\text{N}_3\text{O}_2]^+$  ( $M + \text{H}^+$ ): 258.1237, found: 258.1237.

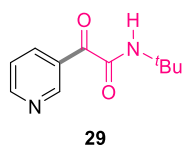

***N*-(*tert*-butyl)-2-oxo-2-(pyridin-3-yl)acetamide (29).** Yellow oil, 30.1 mg, 73% yield (From 3-bromopyridine); 39.2 mg, 95% yield (From 3-iodopyridine).  $^1\text{H-NMR}$  ( $\text{CDCl}_3$ , 400 MHz):  $\delta$  9.38 (s, 1H), 8.72 (d,  $J = 4.7$  Hz, 1H), 8.54 (d,  $J = 8.0$  Hz, 1H), 7.34 (dd,  $J = 8.0, 4.9$  Hz, 1H), 7.03 (br s, 1H), 1.39 (s, 9H);  $^{13}\text{C-NMR}$  ( $\text{CDCl}_3$ , 101 MHz):  $\delta$  187.5, 160.2, 154.0, 152.1, 138.5, 129.2, 123.2, 51.8, 28.3; **HRMS** (ESI-Orbitrap): calcd. for  $[\text{C}_{11}\text{H}_{15}\text{N}_2\text{O}_2]^+$  ( $M + \text{H}^+$ ): 207.1128, found: 207.1127.

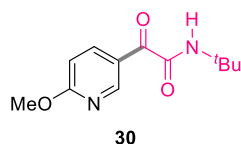

***N*-(*tert*-butyl)-2-(6-methoxypyridin-3-yl)-2-oxoacetamide (30).** Yellow oil, 34.0 mg, 72% yield (From 5-bromo-2-methoxypyridine); 46.3 mg, 98% yield (From 5-iodo-2-

methoxypyridine). **<sup>1</sup>H-NMR** (CDCl<sub>3</sub>, 400 MHz): δ 9.26 (s, 1H), 8.47 (d, *J* = 8.8 Hz, 1H), 7.00 (br s, 1H), 6.75 (d, *J* = 8.8 Hz, 1H), 3.99 (s, 3H), 1.42 (s, 9H); **<sup>13</sup>C-NMR** (CDCl<sub>3</sub>, 101 MHz): δ 186.2, 167.2, 160.9, 153.0, 140.9, 123.6, 110.9, 54.3 51.7, 28.4; **HRMS** (ESI-Orbitrap): calcd. for [C<sub>12</sub>H<sub>17</sub>N<sub>2</sub>O<sub>3</sub>]<sup>+</sup> (M + H<sup>+</sup>): 237.1234, found: 237.1234.

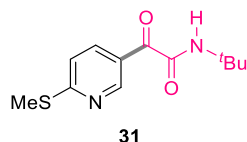

***N*-(*tert*-butyl)-2-(6-(methylthio)pyridin-3-yl)-2-oxoacetamide (31).** Yellow oil, 23.2 mg, 46% yield (From 5-bromo-2-(methylthio)pyridine). **<sup>1</sup>H-NMR** (CDCl<sub>3</sub>, 400 MHz): δ 9.37 (d, *J* = 1.4 Hz, 1H), 8.40 (dd, *J* = 8.6, 2.1 Hz, 1H), 7.23 (d, *J* = 8.6 Hz, 1H), 7.00 (br s, 1H), 2.60 (s, 3H), 1.44 (s, 9H); **<sup>13</sup>C-NMR** (CDCl<sub>3</sub>, 101 MHz): δ 186.7, 167.3, 160.6, 152.7, 137.5, 125.0, 120.8, 51.8, 28.4, 13.4; **HRMS** (ESI-Orbitrap): calcd. for [C<sub>12</sub>H<sub>17</sub>N<sub>2</sub>O<sub>2</sub>S]<sup>+</sup> (M + H<sup>+</sup>): 253.1005, found: 253.1004.

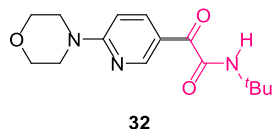

***N*-(*tert*-butyl)-2-(6-morpholinopyridin-3-yl)-2-oxoacetamide (32).** Yellow solid, 46.0 mg, 79% yield (From 4-(5-bromopyridin-2-yl)morpholine); 47.2 mg, 81% yield (From 4-(5-iodopyridin-2-yl)morpholine), m.p. = 90.9 – 92.2 °C. **<sup>1</sup>H-NMR** (CDCl<sub>3</sub>, 400 MHz): δ 9.22 (d, *J* = 2.3 Hz, 1H), 8.41 (dd, *J* = 9.2, 2.3 Hz, 1H), 7.03 (br s, 1H), 6.53 (d, *J* = 9.2 Hz, 1H), 3.78 – 3.73 (m, 4H), 3.70 – 3.67 (m, 4H), 1.40 (s, 9H); **<sup>13</sup>C-NMR** (CDCl<sub>3</sub>, 101 MHz): δ 185.0, 161.7, 160.4 154.2, 140.1, 119.4, 104.9, 66.6, 51.4, 44.8, 28.4; **HRMS** (ESI-Orbitrap): calcd. for [C<sub>15</sub>H<sub>22</sub>N<sub>3</sub>O<sub>3</sub>]<sup>+</sup> (M + H<sup>+</sup>): 292.1656, found: 292.1655.

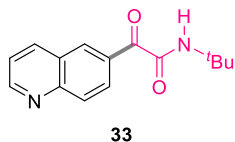

***N*-(*tert*-butyl)-2-oxo-2-(quinolin-6-yl)acetamide (33).** Yellow solid, 46.1 mg, 90% yield (From 6-bromoquinoline); 16.9 mg, 33% yield (From quinolin-6-yl trifluoromethanesulfonate); 48.2 mg, 94% yield (From 6-iodoquinoline), m.p. = 106.6 – 108.5 °C. <sup>1</sup>H-NMR (CDCl<sub>3</sub>, 400 MHz): δ 9.07 (d, *J* = 1.8 Hz, 1H), 8.92 (dd, *J* = 4.2, 1.7 Hz, 1H), 8.30 (dd, *J* = 8.9, 1.9 Hz, 1H), 8.20 (dd, *J* = 8.3, 1.3 Hz, 1H), 8.04 (d, *J* = 8.9 Hz, 1H), 7.38 (dd, *J* = 8.3, 4.3 Hz, 1H), 7.09 (br s, 1H), 1.42 (s, 9H); <sup>13</sup>C-NMR (CDCl<sub>3</sub>, 101 MHz): δ 187.4, 161.0, 153.1, 150.3, 138.1, 134.6, 131.0, 129.8, 129.2, 127.2, 121.9, 51.8, 28.4; HRMS (ESI-Orbitrap): calcd. for [C<sub>15</sub>H<sub>17</sub>N<sub>2</sub>O<sub>2</sub>]<sup>+</sup> (M + H<sup>+</sup>): 257.1285, found: 257.1287.

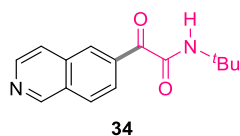

***N*-(*tert*-butyl)-2-(isoquinolin-6-yl)-2-oxoacetamide (34).** Yellow solid, 33.8 mg, 66% yield (From 6-bromoisoquinoline); 16.4 mg, 32% yield (From isoquinolin-6-yl trifluoromethanesulfonate), m.p. = 67.1 – 69.1 °C. <sup>1</sup>H-NMR (CDCl<sub>3</sub>, 400 MHz): δ 9.31 (s, 1H), 9.08 (s, 1H), 8.61 (d, *J* = 5.6 Hz, 1H), 8.25 (d, *J* = 8.6 Hz, 1H), 8.01 (d, *J* = 8.6 Hz, 1H), 7.79 (d, *J* = 5.6 Hz, 1H), 7.07 (br s, 1H), 1.48 (s, 9H); <sup>13</sup>C-NMR (CDCl<sub>3</sub>, 101 MHz): δ 187.9, 160.6, 152.5, 144.0, 135.0, 134.4, 132.8, 130.2, 127.9, 127.1, 122.1, 52.0, 28.5; HRMS (ESI-Orbitrap): calcd. for [C<sub>15</sub>H<sub>17</sub>N<sub>2</sub>O<sub>2</sub>]<sup>+</sup> (M + H<sup>+</sup>): 257.1285, found: 257.1284.

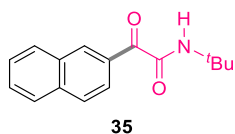

***N*-(*tert*-butyl)-2-(naphthalen-2-yl)-2-oxoacetamide (35).** Yellow solid, 38.8 mg, 76% yield (From 2-bromonaphthalene); 13.3 mg, 26% yield (From naphthalen-2-yl trifluoromethanesulfonate); 43.9 mg, 86% yield (From 2-iodonaphthalene), m.p. = 75.8 – 77.5 °C. <sup>1</sup>H-NMR (CDCl<sub>3</sub>, 400 MHz): δ 9.16 (s, 1H), 8.16 (dd, *J* = 8.7, 1.6 Hz, 1H), 7.98 (d,



$J = 8.1$  Hz, 1H), 7.84 (t,  $J = 8.5$  Hz, 2H), 7.62 – 7.56 (m, 1H), 7.55 – 7.49 (m, 1H), 7.09 (br s, 1H), 1.49 (s, 9H);  **$^{13}\text{C-NMR}$**  ( $\text{CDCl}_3$ , 101 MHz):  $\delta$  188.1, 161.4, 136.0, 134.9, 132.4, 130.6, 130.3, 129.2, 128.3, 127.8, 126.8, 125.5, 51.8, 28.5; **HRMS** (ESI-Orbitrap): calcd. for  $[\text{C}_{16}\text{H}_{18}\text{NO}_2]^+$  ( $\text{M} + \text{H}^+$ ): 256.1332, found: 256.1333.

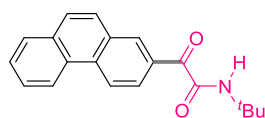

36

***N*-(*tert*-butyl)-2-oxo-2-(phenanthren-2-yl)acetamide (36).** Yellow solid, 45.2 mg, 74% yield (From 2-bromophenanthrene), m.p. = 138.3 – 139.7 °C.  **$^1\text{H-NMR}$**  ( $\text{CDCl}_3$ , 400 MHz):  $\delta$  9.08 (d,  $J = 1.6$  Hz, 1H), 8.69 – 8.60 (m, 2H), 8.40 (dd,  $J = 8.8, 1.7$  Hz, 1H), 7.90 – 7.85 (m, 1H), 7.78 (dd,  $J = 25.2, 8.9$  Hz, 2H), 7.69 – 7.61 (m, 2H), 7.13 (br s, 1H), 1.52 (s, 9H);  **$^{13}\text{C-NMR}$**  ( $\text{CDCl}_3$ , 101 MHz):  $\delta$  187.9, 161.4, 134.1, 133.9, 133.3, 131.2, 131.1, 129.5, 128.7, 128.1, 127.8, 127.7, 127.2, 127.0, 123.5, 123.0, 51.8, 28.5; **HRMS** (ESI-Orbitrap): calcd. for  $[\text{C}_{20}\text{H}_{20}\text{NO}_2]^+$  ( $\text{M} + \text{H}^+$ ): 306.1489, found: 306.1487.

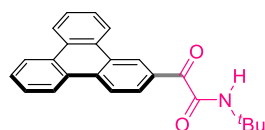

37

***N*-(*tert*-butyl)-2-oxo-2-(triphenylen-2-yl)acetamide (37).** Yellow solid, 52.6 mg, 74% yield (From 2-bromotriphenylene), m.p. = 159.7 – 160.5 °C.  **$^1\text{H-NMR}$**  ( $\text{CDCl}_3$ , 400 MHz):  $\delta$  9.72 (s, 1H), 8.66 – 8.58 (m, 1H), 8.52 (t,  $J = 8.3$  Hz, 4H), 8.44 – 8.37 (m, 1H), 7.69 – 7.54 (m, 4H), 7.18 (br s, 1H), 1.56 (s, 9H);  **$^{13}\text{C-NMR}$**  ( $\text{CDCl}_3$ , 101 MHz):  $\delta$  187.7, 161.5, 134.0, 131.5, 131.0, 129.7, 129.5, 129.3, 128.7, 128.6, 128.4, 127.9, 127.8, 127.6, 127.4, 124.2, 123.7, 123.4, 123.3, 123.2, 51.8, 28.6; **HRMS** (ESI-Orbitrap): calcd. for  $[\text{C}_{24}\text{H}_{22}\text{NO}_2]^+$  ( $\text{M} + \text{H}^+$ ): 356.1645, found: 356.1645.

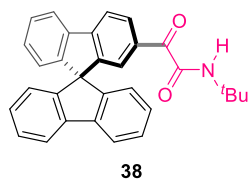

**2-(9,9'-spirobi[fluoren]-2-yl)-N-(tert-butyl)-2-oxoacetamide (38).** Yellow solid, 70.9 mg, 80% yield (From 2-bromo-9,9'-spirobi[fluorene]), m.p. = 207.4 – 210.1 °C. **<sup>1</sup>H-NMR** (CDCl<sub>3</sub>, 400 MHz): δ 8.59 (dd, *J* = 8.1, 1.5 Hz, 1H), 7.95 (dd, *J* = 7.8, 2.5 Hz, 2H), 7.88 (d, *J* = 7.6 Hz, 2H), 7.63 (d, *J* = 0.9 Hz, 1H), 7.40 (q, *J* = 7.6 Hz, 3H), 7.19 (t, *J* = 7.5 Hz, 1H), 7.12 (t, *J* = 7.5 Hz, 2H), 6.88 (br s, 1H), 6.78 (d, *J* = 7.6 Hz, 1H), 6.73 (d, *J* = 7.6 Hz, 2H), 1.41 (s, 9H); **<sup>13</sup>C-NMR** (CDCl<sub>3</sub>, 101 MHz): δ 187.8, 161.4, 150.5, 149.0, 147.8, 147.7, 141.9, 140.2, 132.8, 132.6, 129.6, 128.1, 128.1, 128.0, 126.4, 124.3, 124.0, 121.3, 120.3, 119.7, 65.9, 51.6, 28.4; **HRMS** (ESI-Orbitrap): calcd. for [C<sub>31</sub>H<sub>26</sub>NO<sub>2</sub>]<sup>+</sup> (*M* + *H*<sup>+</sup>): 444.1958, found: 444.1959.

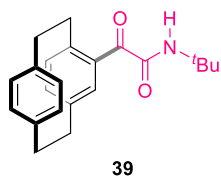

**2-(1,4(1,4)-dibenzenacyclohexaphane-1'-yl)-N-(tert-butyl)-2-oxoacetamide (39).** Yellow solid, 55.6 mg, 83% yield (From 12-bromo-1,4(1,4)-dibenzenacyclohexaphane), m.p. = 70.4 – 72.1 °C. **<sup>1</sup>H-NMR** (CDCl<sub>3</sub>, 400 MHz): δ 6.84 (d, *J* = 7.9 Hz, 1H), 6.65 (s, 1H), 6.58 – 6.51 (m, 3H), 6.49 – 6.41 (m, 2H), 5.40 (br s, 1H), 3.76 – 3.47 (m, 1H), 3.23 – 2.82 (m, 7H), 1.47 (s, 9H); **<sup>13</sup>C-NMR** (CDCl<sub>3</sub>, 101 MHz): δ 168.7, 140.2, 139.6, 139.3, 138.2, 136.6, 135.8, 134.6, 132.6 (d, *J* = 1.8 Hz), 132.5, 132.1, 131.9, 51.5, 35.5, 35.4, 35.2, 34.9, 29.0; **HRMS** (ESI-Orbitrap): calcd. for [C<sub>22</sub>H<sub>26</sub>NO<sub>2</sub>]<sup>+</sup> (*M* + *H*<sup>+</sup>): 336.1958, found: 336.1960.

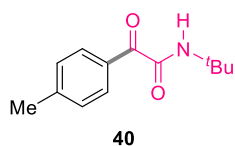

**N-(tert-butyl)-2-oxo-2-(p-tolyl)acetamide (40).** White solid, 18.8 mg, 43% yield (From 1-iodo-4-methylbenzene); 36.4 mg, 83% yield (From p-tolyl trifluoromethanesulfonate), m.p.

= 48.4 – 49.5 °C. **<sup>1</sup>H-NMR** (CDCl<sub>3</sub>, 400 MHz): δ 8.21 (d, *J* = 8.2 Hz, 2H), 7.24 (d, *J* = 8.1 Hz, 2H), 6.95 (br s, 1H), 2.40 (s, 3H), 1.44 (s, 9H); **<sup>13</sup>C-NMR** (CDCl<sub>3</sub>, 101 MHz): δ 188.1, 161.5, 145.4, 131.6, 130.9, 129.2, 51.7, 28.5, 22.0; **HRMS** (ESI-Orbitrap): calcd. for [C<sub>13</sub>H<sub>18</sub>NO<sub>2</sub>]<sup>+</sup> (*M* + *H*<sup>+</sup>): 220.1332, found: 220.1330.

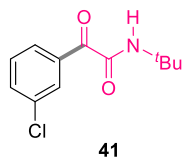

***N*-(*tert*-butyl)-2-(3-chlorophenyl)-2-oxoacetamide (41).** Yellow oil, 12.0 mg, 25% yield (From 3-chlorophenyl trifluoromethanesulfonate). **<sup>1</sup>H-NMR** (CDCl<sub>3</sub>, 400 MHz): δ 8.31 (s, 1H), 8.22 (d, *J* = 7.8 Hz, 1H), 7.60 – 7.54 (m, 1H), 7.41 (t, *J* = 7.9 Hz, 1H), 6.95 (br s, 1H), 1.45 (s, 9H); **<sup>13</sup>C-NMR** (CDCl<sub>3</sub>, 101 MHz): δ 187.2, 160.5, 134.9, 134.7, 134.2, 131.2, 129.8, 129.5, 51.9, 28.4; **HRMS** (ESI-Orbitrap): calcd. for [C<sub>12</sub>H<sub>15</sub>ClNO<sub>2</sub>]<sup>+</sup> (*M* + *H*<sup>+</sup>): 240.0786, found: 240.0788.

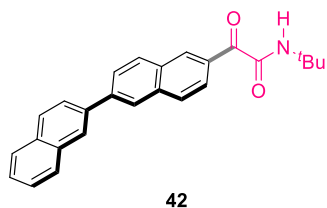

**2-([2,2'-binaphthalen]-6-yl)-*N*-(*tert*-butyl)-2-oxoacetamide (42).** Yellow solid, 19.1 mg, 25% yield (From [2,2'-binaphthalen]-6-yl trifluoromethanesulfonate), m.p. = 143.2 – 145.7 °C. **<sup>1</sup>H-NMR** (CDCl<sub>3</sub>, 400 MHz): δ 9.24 (s, 1H), 8.27 – 8.15 (m, 3H), 8.11 (d, *J* = 8.5 Hz, 1H), 8.01 – 7.81 (m, 6H), 7.60 – 7.47 (m, 2H), 7.10 (br s, 1H), 1.51 (s, 9H); **<sup>13</sup>C-NMR** (CDCl<sub>3</sub>, 101 MHz): δ 187.9, 161.4, 141.8, 137.8, 136.5, 134.8, 133.7, 133.0, 131.6, 131.1, 130.7, 128.8, 128.6, 128.5, 127.8, 126.7, 126.6, 126.5, 126.1, 125.9, 125.6, 51.8, 28.6; **HRMS** (ESI-Orbitrap): calcd. for [C<sub>26</sub>H<sub>24</sub>NO<sub>2</sub>]<sup>+</sup> (*M* + *H*<sup>+</sup>): 382.1802, found: 382.1804.

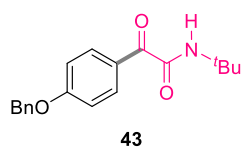

**2-(4-(benzyloxy)phenyl)-*N*-(*tert*-butyl)-2-oxoacetamide (43).** Yellow solid, 54.8 mg, 88% yield (From 1-(benzyloxy)-4-iodobenzene), m.p. = 93.6 – 95.3 °C. **<sup>1</sup>H-NMR** (CDCl<sub>3</sub>, 400

MHz):  $\delta$  8.38 (d,  $J$  = 8.9 Hz, 2H), 7.46 – 7.33 (m, 5H), 7.05 – 6.94 (m, 3H), 5.12 (s, 2H), 1.45 (s, 9H);  $^{13}\text{C-NMR}$  ( $\text{CDCl}_3$ , 101 MHz):  $\delta$  186.6, 163.7, 161.7, 136.0, 134.0, 128.8, 128.4, 127.6, 126.6, 114.6, 70.2, 51.6, 28.5; **HRMS** (ESI-Orbitrap): calcd. for  $[\text{C}_{19}\text{H}_{22}\text{NO}_3]^+$  ( $\text{M} + \text{H}^+$ ): 312.1594, found: 312.1598.

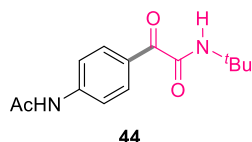

**2-(4-acetamidophenyl)-*N*-(*tert*-butyl)-2-oxoacetamide (44).** Yellow solid, 30.4 mg, 58% yield (From *N*-(4-iodophenyl)acetamide), m.p. = 161.2 – 163.1 °C.  $^1\text{H-NMR}$  ( $\text{CDCl}_3$ , 400 MHz):  $\delta$  8.53 (s, 1H), 8.14 (d,  $J$  = 8.7 Hz, 2H), 7.52 (d,  $J$  = 8.7 Hz, 2H), 7.00 (br s, 1H), 2.13 (s, 3H), 1.44 (s, 9H);  $^{13}\text{C-NMR}$  ( $\text{CDCl}_3$ , 101 MHz):  $\delta$  187.3, 169.5, 162.4, 143.8, 132.5, 128.5, 119.0, 51.9, 28.5, 24.7; **HRMS** (ESI-Orbitrap): calcd. for  $[\text{C}_{14}\text{H}_{19}\text{N}_2\text{O}_3]^+$  ( $\text{M} + \text{H}^+$ ): 263.1390, found: 263.1391.

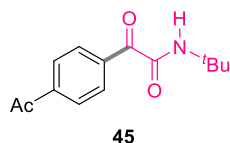

**2-(4-acetylphenyl)-*N*-(*tert*-butyl)-2-oxoacetamide (45).** Yellow solid, 35.1 mg, 71% yield (From 1-(4-iodophenyl)ethan-1-one), m.p. = 67.2 – 69.3 °C.  $^1\text{H-NMR}$  ( $\text{CDCl}_3$ , 400 MHz):  $\delta$  8.33 (d,  $J$  = 8.4 Hz, 2H), 7.97 (d,  $J$  = 8.4 Hz, 2H), 6.97 (br s, 1H), 2.61 (s, 3H), 1.43 (s, 9H);  $^{13}\text{C-NMR}$  ( $\text{CDCl}_3$ , 101 MHz):  $\delta$  197.6, 188.0, 160.6, 140.6, 136.7, 131.4, 128.1, 51.9, 28.4, 27.0; **HRMS** (ESI-Orbitrap): calcd. for  $[\text{C}_{14}\text{H}_{18}\text{NO}_3]^+$  ( $\text{M} + \text{H}^+$ ): 248.1281, found: 248.1282.

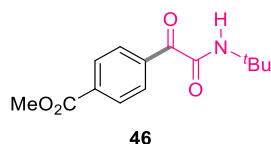

**Methyl 4-(2-(*tert*-butylamino)-2-oxoacetyl)benzoate (46).** White solid, 35.3 mg, 67% yield (From methyl 4-iodobenzoate), m.p. = 115.9 – 117.1 °C.  $^1\text{H-NMR}$  ( $\text{CDCl}_3$ , 400 MHz):  $\delta$  8.32 (d,  $J$  = 8.5 Hz, 2H), 8.07 (d,  $J$  = 8.5 Hz, 2H), 6.97 (br s, 1H), 3.92 (s, 3H), 1.43 (s, 9H);  $^{13}\text{C-NMR}$  ( $\text{CDCl}_3$ , 101 MHz):  $\delta$  188.1, 166.2, 160.6, 136.8, 134.6, 131.2, 129.5, 52.6,

51.9, 28.4; **HRMS** (ESI-Orbitrap): calcd. for  $[C_{14}H_{18}NO_4]^+$  ( $M + H^+$ ): 264.1230, found: 264.1233.

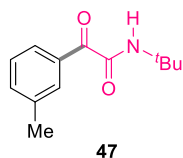

***N*-(*tert*-butyl)-2-oxo-2-(*m*-tolyl)acetamide (47).** White solid, 33.7 mg, 77% yield (From 1-iodo-3-methylbenzene), m.p. = 58.5 – 60.2 °C. **<sup>1</sup>H-NMR** ( $CDCl_3$ , 400 MHz):  $\delta$  8.07 (d,  $J$  = 8.0 Hz, 2H), 7.39 (d,  $J$  = 7.3 Hz, 1H), 7.33 (t,  $J$  = 7.7 Hz, 1H), 6.94 (br s, 1H), 2.39 (s, 3H), 1.44 (s, 9H); **<sup>13</sup>C-NMR** ( $CDCl_3$ , 101 MHz):  $\delta$  188.8, 161.3, 138.2, 135.1, 133.4, 131.6, 128.5, 128.3, 51.7, 28.4, 21.4; **HRMS** (ESI-Orbitrap): calcd. for  $[C_{13}H_{17}NNaO_2]^+$  ( $M + Na^+$ ): 242.1151, found: 242.1155.

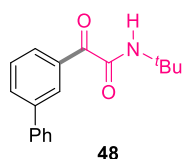

**2-([1,1'-biphenyl]-3-yl)-*N*-(*tert*-butyl)-2-oxoacetamide (48).** Yellow oil, 36.5 mg, 65% yield (From 3-iodo-1,1'-biphenyl). **<sup>1</sup>H-NMR** ( $CDCl_3$ , 400 MHz):  $\delta$  8.54 (s, 1H), 8.30 (d,  $J$  = 7.8 Hz, 1H), 7.83 (d,  $J$  = 7.9 Hz, 1H), 7.63 (d,  $J$  = 7.3 Hz, 2H), 7.53 (t,  $J$  = 7.8 Hz, 1H), 7.46 (t,  $J$  = 7.5 Hz, 2H), 7.38 (t,  $J$  = 7.3 Hz, 1H), 7.02 (br s, 1H), 1.48 (s, 9H); **<sup>13</sup>C-NMR** ( $CDCl_3$ , 101 MHz):  $\delta$  188.6, 161.2, 141.5, 140.0, 133.9, 132.8, 130.1, 129.8, 129.0, 128.9, 127.8, 127.3, 51.8, 28.4; **HRMS** (ESI-Orbitrap): calcd. for  $[C_{18}H_{19}NNaO_2]^+$  ( $M + Na^+$ ): 304.1308, found: 304.1304.

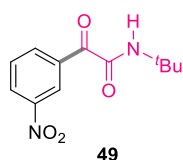

***N*-(*tert*-butyl)-2-(3-nitrophenyl)-2-oxoacetamide (49).** Yellow solid, 37.5 mg, 75% yield (From 1-iodo-3-nitrobenzene), m.p. = 27.3 – 29.1 °C. **<sup>1</sup>H-NMR** ( $CDCl_3$ , 400 MHz):  $\delta$  9.12 (s, 1H), 8.66 (d,  $J$  = 7.8 Hz, 1H), 8.42 (ddd,  $J$  = 8.2, 2.1, 0.9 Hz, 1H), 7.66 (t,  $J$  = 8.0 Hz,

1H), 7.02 (br s, 1H), 1.45 (s, 9H); **<sup>13</sup>C-NMR** (CDCl<sub>3</sub>, 101 MHz): δ 186.2, 159.9, 148.2, 137.0, 134.7, 129.7, 128.2, 126.2, 52.1, 28.4; **HRMS** (ESI-Orbitrap): calcd. for [C<sub>12</sub>H<sub>14</sub>N<sub>2</sub>NaO<sub>4</sub>]<sup>+</sup> (M + Na<sup>+</sup>): 273.0846, found: 273.0851.

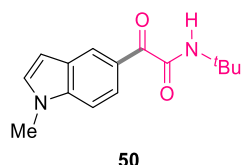

***N*-(*tert*-butyl)-2-(1-methyl-1*H*-indol-5-yl)-2-oxoacetamide (50).** Yellow solid, 28.4 mg, 55% yield (From 5-iodo-1-methyl-1*H*-indole), m.p. = 64.0 – 66.5 °C. **<sup>1</sup>H-NMR** (CDCl<sub>3</sub>, 400 MHz): δ 8.89 (d, *J* = 1.5 Hz, 1H), 8.13 (dd, *J* = 8.8, 1.6 Hz, 1H), 7.31 (d, *J* = 8.8 Hz, 1H), 7.08 (d, *J* = 3.2 Hz, 1H), 7.01 (br s, 1H), 6.61 (d, *J* = 3.1 Hz, 1H), 3.78 (s, 3H), 1.47 (s, 9H); **<sup>13</sup>C-NMR** (CDCl<sub>3</sub>, 101 MHz): δ 188.2, 162.6, 139.8, 130.6, 128.0, 127.5, 125.2, 124.3, 109.3, 103.9, 51.6, 33.1, 28.5; **HRMS** (ESI-Orbitrap): calcd. for [C<sub>15</sub>H<sub>19</sub>N<sub>2</sub>O<sub>2</sub>]<sup>+</sup> (M + H<sup>+</sup>): 259.1441, found: 259.1446.

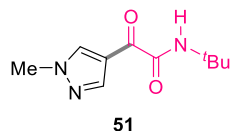

***N*-(*tert*-butyl)-2-(1-methyl-1*H*-pyrazol-4-yl)-2-oxoacetamide (51).** Yellow solid, 33.9 mg, 81% yield (From 4-iodo-1-methyl-1*H*-pyrazole), m.p. = 66.2 – 67.9 °C. **<sup>1</sup>H-NMR** (CDCl<sub>3</sub>, 400 MHz): δ 8.60 (s, 1H), 8.16 (s, 1H), 7.14 (br s, 1H), 3.90 (s, 3H), 1.39 (s, 9H); **<sup>13</sup>C-NMR** (CDCl<sub>3</sub>, 101 MHz): δ 181.1, 160.5, 143.1, 137.1, 118.6, 51.3, 39.3, 28.4; **HRMS** (ESI-Orbitrap): calcd. for [C<sub>10</sub>H<sub>16</sub>N<sub>3</sub>O<sub>2</sub>]<sup>+</sup> (M + H<sup>+</sup>): 210.1237, found: 210.1237.

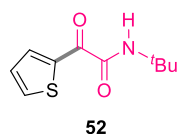

***N*-(*tert*-butyl)-2-oxo-2-(thiophen-2-yl)acetamide (52).** Yellow solid, 25.8 mg, 61% yield (From 2-iodothiophene), m.p. = 31.3 – 33.7 °C. **<sup>1</sup>H-NMR** (CDCl<sub>3</sub>, 400 MHz): δ 8.34 (dd, *J* = 3.8, 0.7 Hz, 1H), 7.81 (dd, *J* = 4.9, 1.0 Hz, 1H), 7.19 (br s, 1H), 7.16 (t, *J* = 4.4 Hz, 1H),

1.44 (s, 9H);  $^{13}\text{C-NMR}$  ( $\text{CDCl}_3$ , 101 MHz):  $\delta$  179.3, 160.1, 138.8, 138.0, 136.3, 128.1, 51.7, 28.5; **HRMS** (ESI-Orbitrap): calcd. for  $[\text{C}_{10}\text{H}_{14}\text{NO}_2\text{S}]^+$  ( $\text{M} + \text{H}^+$ ): 212.0740, found: 212.0741.

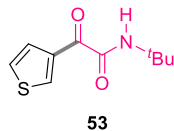

***N*-(*tert*-butyl)-2-oxo-2-(thiophen-3-yl)acetamide (53).** Yellow solid, 35.9 mg, 85% yield (From 3-iodothiophene), m.p. = 36.8 – 37.6 °C.  $^1\text{H-NMR}$  ( $\text{CDCl}_3$ , 400 MHz):  $\delta$  9.08 (dd,  $J$  = 2.9, 1.1 Hz, 1H), 7.73 (dd,  $J$  = 5.1, 1.1 Hz, 1H), 7.26 (dd,  $J$  = 5.2, 2.9 Hz, 1H), 7.13 (br s, 1H), 1.41 (s, 9H);  $^{13}\text{C-NMR}$  ( $\text{CDCl}_3$ , 101 MHz):  $\delta$  181.0, 160.6, 139.4, 137.0, 128.9, 125.6, 51.5, 28.4; **HRMS** (ESI-Orbitrap): calcd. for  $[\text{C}_{10}\text{H}_{14}\text{NO}_2\text{S}]^+$  ( $\text{M} + \text{H}^+$ ): 212.0740, found: 212.0742.

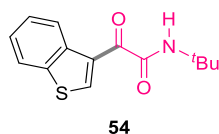

**2-(benzo[*b*]thiophen-3-yl)-*N*-(*tert*-butyl)-2-oxoacetamide (54).** Yellow solid, 50.6 mg, 97% yield (From 3-iodobenzo[*b*]thiophene), m.p. = 35.3 – 36.2 °C.  $^1\text{H-NMR}$  ( $\text{CDCl}_3$ , 400 MHz):  $\delta$  9.72 (s, 1H), 8.70 (d,  $J$  = 8.2 Hz, 1H), 7.87 (d,  $J$  = 8.0 Hz, 1H), 7.50 (td,  $J$  = 7.64 Hz, 1.1 Hz, 1H), 7.41 (td,  $J$  = 8.1, 1.2 Hz, 1H), 7.30 (br s, 1H), 1.47 (s, 9H);  $^{13}\text{C-NMR}$  ( $\text{CDCl}_3$ , 101 MHz):  $\delta$  181.2, 161.0, 145.7, 138.9, 137.6, 129.9, 126.1, 125.6, 125.2, 122.4, 51.5, 28.4; **HRMS** (ESI-Orbitrap): calcd. for  $[\text{C}_{14}\text{H}_{16}\text{NO}_2\text{S}]^+$  ( $\text{M} + \text{H}^+$ ): 262.0896, found: 262.0897.

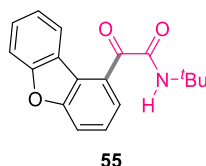

***N*-(*tert*-butyl)-2-(dibenzo[*b,d*]furan-1-yl)-2-oxoacetamide (55).** White solid, 42.5 mg, 72% yield (From 1-iododibenzo[*b,d*]furan), m.p. = 117.4 – 119.3 °C.  $^1\text{H-NMR}$  ( $\text{CDCl}_3$ , 400 MHz):  $\delta$  8.46 (d,  $J$  = 8.0 Hz, 1H), 8.24 (d,  $J$  = 7.7 Hz, 1H), 7.77 (d,  $J$  = 8.2 Hz, 1H), 7.57 (d,  $J$  = 8.2 Hz, 1H), 7.53 – 7.48 (m, 2H), 7.33 (t,  $J$  = 8.1 Hz, 1H), 7.12 (br s, 1H), 1.51 (s, 9H);  $^{13}\text{C-}$

**NMR** (CDCl<sub>3</sub>, 101 MHz):  $\delta$  189.8, 161.5, 157.0, 156.6, 128.6, 128.5, 126.0, 125.5, 124.2, 122.8, 117.2, 111.5, 51.9, 28.5; **HRMS** (ESI-Orbitrap): calcd. for [C<sub>18</sub>H<sub>18</sub>NO<sub>3</sub>]<sup>+</sup> (M + H<sup>+</sup>): 296.1281, found: 296.1281.

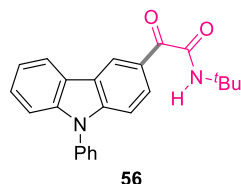

**N-(tert-butyl)-2-oxo-2-(9-phenyl-9H-carbazol-3-yl)acetamide (56).** Yellow solid, 62.9 mg, 85% yield (From 3-iodo-9-phenyl-9H-carbazole), m.p. = 194.9 – 196.7 °C. **<sup>1</sup>H-NMR** (CDCl<sub>3</sub>, 400 MHz):  $\delta$  9.38 (s, 1H), 8.41 (d, *J* = 8.8 Hz, 1H), 8.24 (d, *J* = 7.7 Hz, 1H), 7.62 (d, *J* = 7.7 Hz, 2H), 7.57 – 7.51 (m, 3H), 7.48 – 7.32 (m, 5H), 7.13 (br s, 1H), 1.51 (s, 9H); **<sup>13</sup>C-NMR** (CDCl<sub>3</sub>, 101 MHz):  $\delta$  187.2, 162.2, 144.3, 141.8, 136.8, 130.2, 129.6, 128.3, 127.2, 126.9, 125.9, 125.7, 123.7, 123.2, 121.3, 121.0, 110.4, 109.7, 51.7, 28.6; **HRMS** (ESI-Orbitrap): calcd. for [C<sub>24</sub>H<sub>23</sub>N<sub>2</sub>O<sub>2</sub>]<sup>+</sup> (M + H<sup>+</sup>): 371.1754, found: 371.1755.

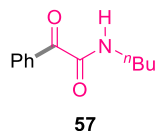

**N-butyl-2-oxo-2-phenylacetamide (57).** Yellow oil, 32.8 mg, 80% yield (From 1-isocyanobutane). **<sup>1</sup>H-NMR** (CDCl<sub>3</sub>, 400 MHz):  $\delta$  8.38 – 8.27 (m, 2H), 7.61 (t, *J* = 7.4 Hz, 1H), 7.47 (t, *J* = 7.8 Hz, 2H), 7.11 (br s, 1H), 3.39 (dd, *J* = 13.6, 6.8 Hz, 2H), 1.67 – 1.51 (m, 2H), 1.47 – 1.33 (m, 2H), 0.95 (t, *J* = 7.3 Hz, 3H); **<sup>13</sup>C-NMR** (CDCl<sub>3</sub>, 101 MHz):  $\delta$  188.0, 161.9, 134.5, 133.5, 131.3, 128.6, 39.3, 31.4, 20.2, 13.8; **HRMS** (ESI-Orbitrap): calcd. for [C<sub>12</sub>H<sub>16</sub>NO<sub>2</sub>]<sup>+</sup> (M + H<sup>+</sup>): 206.1176, found: 206.1180.

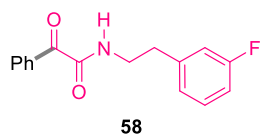

**N-(2-fluorophenethyl)-2-oxo-2-phenylacetamide (58).** Yellow oil, 40.7 mg, 75% yield (From 1-fluoro-3-(2-isocyanoethyl)benzene). **<sup>1</sup>H-NMR** (CDCl<sub>3</sub>, 400 MHz):  $\delta$  8.29 (d, *J* = 7.8



Hz, 2H), 7.62 (t,  $J = 7.4$  Hz, 1H), 7.47 (t,  $J = 7.7$  Hz, 2H), 7.31 – 7.24 (m, 1H), 7.21 (br s, 1H), 7.00 (d,  $J = 7.6$  Hz, 1H), 6.97 – 6.90 (m, 2H), 3.65 (q,  $J = 6.9$  Hz, 2H), 2.90 (t,  $J = 7.1$  Hz, 2H);  $^{13}\text{C-NMR}$  ( $\text{CDCl}_3$ , 101 MHz):  $\delta$  187.7, 163.0 (d,  $J = 246.2$  Hz), 161.9, 140.9 (d,  $J = 7.4$  Hz), 134.6, 133.3, 131.2, 130.3 (d,  $J = 8.4$  Hz), 128.6, 124.5 (d,  $J = 2.8$  Hz), 115.7 (d,  $J = 21.1$  Hz), 113.7 (d,  $J = 21.0$  Hz), 40.4, 35.3; **HRMS** (ESI-Orbitrap): calcd. for  $[\text{C}_{16}\text{H}_{15}\text{FNO}_2]^+$  ( $\text{M} + \text{H}^+$ ): 272.1081, found: 272.1090.

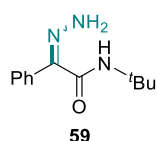

***N*-(*tert*-butyl)-2-hydrazono-2-phenylacetamide (59).** Yellow oil, 43.1 mg, 98% yield. 95:5 1:1 *Z/E*;  $^1\text{H-NMR}$  ( $\text{CDCl}_3$ , 400 MHz):  $\delta$  (*Z + E*) 7.64 (s, 2H), 7.44 (t,  $J = 7.7$  Hz, 4H), 7.36 (t,  $J = 7.8$  Hz, 4H), 7.30 (t,  $J = 6.8$  Hz, 2H), 6.94 (br s, 1H), 5.73 (s, 2H), 5.60 (s, 1H), 1.40 (s, 9H), 1.37 (s, 9H);  $^{13}\text{C-NMR}$  ( $\text{CDCl}_3$ , 101 MHz):  $\delta$  (*Z + E*) 163.6, 163.4, 142.1, 138.1, 136.4, 129.2, 129.1, 128.9, 128.8, 128.4, 127.6, 52.0, 50.8, 28.9, 28.8; **HRMS** (ESI-Orbitrap): calcd. for  $[\text{C}_{12}\text{H}_{18}\text{N}_3\text{O}]^+$  ( $\text{M} + \text{H}^+$ ): 220.1444, found: 220.1443.

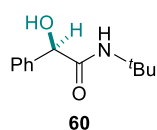

***N*-(*tert*-butyl)-2-hydroxy-2-phenylacetamide (60).** White solid, 37.9 mg, 92% yield, m.p. = 116.7 – 117.5 °C.  $^1\text{H-NMR}$  ( $\text{CDCl}_3$ , 400 MHz):  $\delta$  7.31 (s, 5H), 6.32 (br s, 1H), 4.77 (s, 1H), 4.24 (br s, 1H), 1.28 (s, 9H);  $^{13}\text{C-NMR}$  ( $\text{CDCl}_3$ , 101 MHz):  $\delta$  171.6, 140.0, 128.8, 128.4, 126.9, 74.2, 51.4, 28.7; **HRMS** (ESI-Orbitrap): calcd. for  $[\text{C}_{12}\text{H}_{18}\text{NO}_2]^+$  ( $\text{M} + \text{H}^+$ ): 208.1332, found: 208.1333.

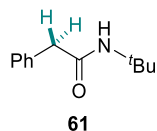

***N*-(*tert*-butyl)-2-phenylacetamide (61).** White solid, 31.6 mg, 83% yield, m.p. = 107.5 – 108.9 °C. **<sup>1</sup>H-NMR** (CDCl<sub>3</sub>, 400 MHz): δ 7.34 (t, *J* = 7.2 Hz, 2H), 7.28 (d, *J* = 7.1 Hz, 1H), 7.24 (d, *J* = 8.0 Hz, 2H), 5.25 (br s, 1H), 3.48 (s, 2H), 1.28 (s, 9H); **<sup>13</sup>C-NMR** (CDCl<sub>3</sub>, 101 MHz): δ 170.4, 135.6, 129.4, 129.0, 127.2, 51.3, 45.0, 28.8; **HRMS** (ESI-Orbitrap): calcd. for [C<sub>12</sub>H<sub>18</sub>NO]<sup>+</sup> (*M* + H<sup>+</sup>): 192.1383, found: 192.1382.

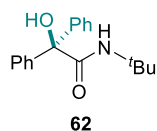

***N*-(*tert*-butyl)-2-hydroxy-2,2-diphenylacetamide (62).** White solid, 53.4 mg, 94% yield, m.p. = 124.7 – 126.2 °C. **<sup>1</sup>H-NMR** (CDCl<sub>3</sub>, 400 MHz): δ 7.44 – 7.35 (m, 4H), 7.33 – 7.29 (m, 6H), 6.49 (br s, 1H), 4.55 (s, 1H), 1.34 (s, 9H); **<sup>13</sup>C-NMR** (CDCl<sub>3</sub>, 101 MHz): δ 172.3, 143.3, 128.2, 127.8, 127.5, 81.2, 51.5, 28.5; **HRMS** (ESI-Orbitrap): calcd. for [C<sub>18</sub>H<sub>22</sub>NO<sub>2</sub>]<sup>+</sup> (*M* + H<sup>+</sup>): 284.1645, found: 284.1649.

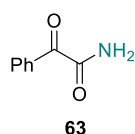

**2-oxo-2-phenylacetamide (63).** White solid, 17.9 mg, 60% yield, m.p. = 71.8 – 73.0 °C. **<sup>1</sup>H-NMR** (CDCl<sub>3</sub>, 400 MHz): δ 8.22 (d, *J* = 7.9 Hz, 2H), 7.59 (t, *J* = 7.4 Hz, 1H), 7.44 (t, *J* = 7.7 Hz, 2H), 7.25 (br s, 1H), 7.02 (br s, 1H); **<sup>13</sup>C-NMR** (CDCl<sub>3</sub>, 101 MHz): δ 188.0, 164.9, 134.5, 132.9, 131.0, 128.5; **HRMS** (ESI-Orbitrap): calcd. for [C<sub>8</sub>H<sub>8</sub>NO<sub>2</sub>]<sup>+</sup> (*M* + H<sup>+</sup>): 150.0550, found: 150.0548.

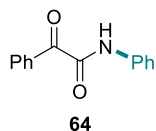

**2-oxo-N,2-diphenylacetamide (64).** Yellow solid, 41.4 mg, 92% yield, m.p. = 56.7 – 58.4 °C. **<sup>1</sup>H-NMR** (CDCl<sub>3</sub>, 400 MHz): δ 9.04 (br s, 1H), 8.40 (d, *J* = 7.8 Hz, 2H), 7.71 (d, *J* = 8.0 Hz, 2H), 7.65 (t, *J* = 7.4 Hz, 1H), 7.50 (t, *J* = 7.7 Hz, 2H), 7.39 (t, *J* = 7.8 Hz, 2H), 7.20 (t, *J* = 7.4 Hz, 1H); **<sup>13</sup>C-NMR** (CDCl<sub>3</sub>, 101 MHz): δ 187.5, 159.0, 136.7, 134.7, 133.1, 131.5, 129.3, 128.6, 125.3, 120.0; **HRMS** (ESI-Orbitrap): calcd. for [C<sub>14</sub>H<sub>12</sub>NO<sub>2</sub>]<sup>+</sup> (M + H<sup>+</sup>): 226.0863, found: 226.0864.

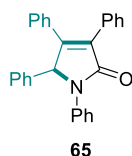

**1,3,4,5-tetraphenyl-1,5-dihydro-2H-pyrrol-2-one (65).** Yellow solid, 62.7 mg, 81% yield, m.p. = 146.5 – 148.4 °C. **<sup>1</sup>H-NMR** (CDCl<sub>3</sub>, 400 MHz): δ 7.63 (d, *J* = 8.2 Hz, 2H), 7.56 – 7.46 (m, 2H), 7.38 – 7.25 (m, 5H), 7.25 – 7.12 (m, 8H), 7.11 – 7.02 (m, 3H), 6.00 (s, 1H); **<sup>13</sup>C-NMR** (CDCl<sub>3</sub>, 101 MHz): δ 169.5, 153.4, 137.6, 135.7, 132.6, 132.1, 131.1, 129.9, 129.9, 128.9, 128.7, 128.5, 128.4, 128.3, 127.6, 124.7, 122.0, 121.9, 121.9, 67.7 (d, *J* = 7.9 Hz); **HRMS** (ESI-Orbitrap): calcd. for [C<sub>28</sub>H<sub>22</sub>NO]<sup>+</sup> (M + H<sup>+</sup>): 388.1696, found: 388.1696.

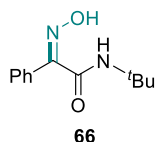

**(Z)-N-(tert-butyl)-2-(hydroxyimino)-2-phenylacetamide (66).** White solid, 41.8 mg, 95% yield, m.p. = 147.4 – 149.3 °C. **<sup>1</sup>H-NMR** (CDCl<sub>3</sub>, 400 MHz): δ 10.37 (s, 1H), 7.57 (dd, *J* = 7.8, 1.8 Hz, 2H), 7.45 – 7.31 (m, 3H), 5.89 (br s, 1H), 1.43 (s, 9H); **<sup>13</sup>C-NMR** (CD<sub>3</sub>OD, 101 MHz): δ 166.3, 154.3, 133.6, 130.5, 129.5, 127.1, 53.0, 29.0; **HRMS** (ESI-Orbitrap): calcd. for [C<sub>12</sub>H<sub>17</sub>N<sub>2</sub>O<sub>2</sub>]<sup>+</sup> (M + H<sup>+</sup>): 221.1285, found: 221.1286.

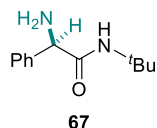

**2-amino-*N*-(*tert*-butyl)-2-phenylacetamide (67).** White solid, 37.1 mg, 90% yield, m.p. = 49.8 – 50.8 °C **<sup>1</sup>H-NMR** (CDCl<sub>3</sub>, 400 MHz): δ 7.37 – 7.22 (m, 5H), 6.99 (br s, 1H), 4.36 (s, 1H), 1.87 (br s, 2H), 1.32 (s, 9H); **<sup>13</sup>C-NMR** (CDCl<sub>3</sub>, 101 MHz): δ 172.2, 141.5, 128.8, 127.9, 126.9, 60.3, 50.8, 28.7; **HRMS** (ESI-Orbitrap): calcd. for [C<sub>12</sub>H<sub>19</sub>N<sub>2</sub>O]<sup>+</sup> (M + H<sup>+</sup>): 207.1492, found: 207.1495.

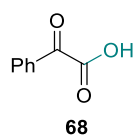

**2-oxo-2-phenylacetic acid (68).** White solid, 29.4 mg, 98% yield, m.p. = 57.2 – 59.0 °C. **<sup>1</sup>H-NMR** (CDCl<sub>3</sub>, 400 MHz): δ 9.60 (s, 1H), 8.24 (d, *J* = 8.5 Hz, 2H), 7.70 (t, *J* = 7.5 Hz, 1H), 7.53 (t, *J* = 7.8 Hz, 2H); **<sup>13</sup>C-NMR** (CDCl<sub>3</sub>, 101 MHz): δ 184.9, 163.1, 135.8, 131.8, 131.2, 129.1; **HRMS** (ESI-Orbitrap): calcd. for [C<sub>8</sub>H<sub>7</sub>O<sub>3</sub>]<sup>+</sup> (M + H<sup>+</sup>): 151.0390, found: 151.0394.

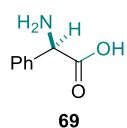

**2-amino-2-phenylacetic acid (69).** White solid, 24.3 mg, 80% yield. **<sup>1</sup>H-NMR** (D<sub>2</sub>O, 400 MHz) δ 7.34 – 7.17 (m, 5H), 4.98 (s, 1H); **<sup>13</sup>C-NMR** (D<sub>2</sub>O, 101 MHz): δ 170.5, 131.1, 130.3, 129.6, 128.0, 56.3; **HRMS** (ESI-Orbitrap): calcd. for [C<sub>8</sub>H<sub>10</sub>NO<sub>2</sub>]<sup>+</sup> (M + H<sup>+</sup>): 152.0706, found: 152.0713. The **<sup>1</sup>H-NMR** and **<sup>13</sup>C-NMR** spectra are in agreement with those reported in the literature.<sup>24</sup>

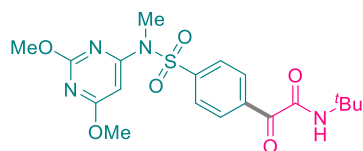

70

***N*-(*tert*-butyl)-2-(4-(*N*-(2,6-dimethoxypyrimidin-4-yl)-*N*-methylsulfamoyl)phenyl)-2-oxoacetamide (70).** Yellow solid, 56.7 mg, 65% yield (From aryl bromide derivative of Sulfadimethoxine); 75.9 mg, 87% yield (From aryl iodide derivative of Sulfadimethoxine), m.p. = 39.4 – 41.4 °C. **<sup>1</sup>H-NMR** (CDCl<sub>3</sub>, 400 MHz): δ 8.36 (d, *J* = 8.3 Hz, 2H), 7.84 (d, *J* = 8.3 Hz, 2H), 6.95 (br s, 1H), 6.55 (s, 1H), 3.89 (s, 3H), 3.80 (s, 3H), 3.43 (s, 3H), 1.41 (s, 9H); **<sup>13</sup>C-NMR** (CDCl<sub>3</sub>, 101 MHz): δ 187.1, 172.6, 164.3, 161.0, 160.0, 142.9, 137.0, 131.9, 127.0, 90.0, 54.9, 54.2, 52.0, 34.7, 28.3; **HRMS** (ESI-Orbitrap): calcd. for [C<sub>19</sub>H<sub>25</sub>N<sub>4</sub>O<sub>6</sub>S]<sup>+</sup> (M + H<sup>+</sup>): 437.1489, found: 437.1490.

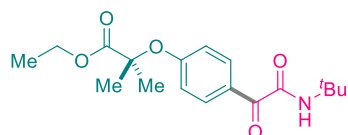

71

**Ethyl 2-(4-(2-(*tert*-butylamino)-2-oxoacetyl)phenoxy)-2-methylpropanoate (71).** Yellow solid, 50.9 mg, 76% yield (From aryl iodide derivative of Clofibrate), m.p. = 96.9 – 98.6 °C. **<sup>1</sup>H-NMR** (CDCl<sub>3</sub>, 400 MHz): δ 8.28 (d, *J* = 9.1 Hz, 2H), 6.95 (br s, 1H), 6.79 (d, *J* = 9.1 Hz, 2H), 4.19 (q, *J* = 7.1 Hz, 2H), 1.63 (s, 6H), 1.41 (s, 9H), 1.18 (t, *J* = 7.1 Hz, 3H); **<sup>13</sup>C-NMR** (CDCl<sub>3</sub>, 101 MHz): δ 186.7, 173.6, 161.6, 160.9, 133.5, 126.8, 117.0, 79.4, 61.8, 51.6, 28.4, 25.4, 14.1; **HRMS** (ESI-Orbitrap): calcd. for [C<sub>18</sub>H<sub>26</sub>NO<sub>5</sub>]<sup>+</sup> (M + H<sup>+</sup>): 336.1805, found: 336.1806.

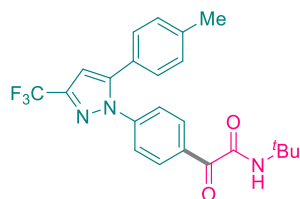

72

***N*-(*tert*-butyl)-2-oxo-2-(4-(5-(*p*-tolyl)-3-(trifluoromethyl)-1*H*-pyrazol-1-yl)phenyl)acetamide (72).** Yellow solid, 73.0 mg, 85% yield (From aryl bromide derivative of

Celecoxib); 78.1 mg, 91% yield (From aryl iodide derivative of Celecoxib), m.p. = 89.5 – 91.3 °C. **<sup>1</sup>H-NMR** (CDCl<sub>3</sub>, 400 MHz): δ 8.34 (d, *J* = 8.7 Hz, 2H), 7.42 (d, *J* = 8.7 Hz, 2H), 7.13 (dd, *J* = 18.6, 8.1 Hz, 4H), 6.99 (br s, 1H), 6.73 (s, 1H), 2.37 (s, 3H), 1.45 (s, 9H); **<sup>13</sup>C-NMR** (CDCl<sub>3</sub>, 101 MHz): δ 187.1, 160.7 145.3, 144.0 (q, *J* = 78.1, 39.6 Hz), 143.6, 139.7, 134.8, 132.6, 132.4, 130.6, 129.7, 129.0, 128.8, 128.5, 126.0, 125.5, 124.7, 121.2 (q, *J* = 269.1 Hz), 106.4 (d, *J* = 1.8 Hz), 51.8, 28.4, 21.4; **HRMS** (ESI-Orbitrap): calcd. for [C<sub>23</sub>H<sub>23</sub>F<sub>3</sub>N<sub>3</sub>O<sub>2</sub>]<sup>+</sup> (M + H<sup>+</sup>): 430.1737, found: 430.1739.

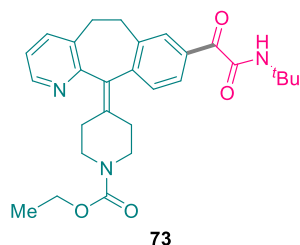

**Ethyl 4-(8-(2-(*tert*-butylamino)-2-oxoacetyl)-5,6-dihydro-11*H*-benzo[5,6]cyclohepta[1,2-*b*]pyridin-11-ylidene)piperidine-1-carboxylate (73).** Yellow solid, 82.7 mg, 87% yield (From aryl iodide derivative of Loratadine), m.p. = 175.9 – 177.8 °C. **<sup>1</sup>H-NMR** (CDCl<sub>3</sub>, 400 MHz): δ 8.37 (d, *J* = 3.6 Hz, 1H), 8.14 (s, 1H), 8.06 (d, *J* = 8.0 Hz, 1H), 7.41 (d, *J* = 7.5 Hz, 1H), 7.28 (s, 1H), 7.07 (dd, *J* = 7.7, 4.8 Hz, 1H), 6.95 (br s, 1H), 4.10 (q, *J* = 7.1 Hz, 2H), 3.79 (s, 2H), 3.50 – 3.39 (m, 1H), 3.38 – 3.28 (m, 1H), 3.18 – 3.02 (m, 2H), 2.94 – 2.78 (m, 2H), 2.54 – 2.42 (m, 1H), 2.38 – 2.21 (m, 3H), 1.40 (s, 9H), 1.21 (t, *J* = 7.1 Hz, 3H); **<sup>13</sup>C-NMR** (CDCl<sub>3</sub>, 101 MHz): δ 188.0, 161.2, 156.1, 155.4, 146.7, 145.7, 138.1, 138.1 137.8, 134.6, 133.5, 132.5, 131.8, 129.3, 129.1, 122.4, 61.3, 51.6, 44.8, 31.6 (d, *J* = 4.4 Hz), 30.9, 30.5, 28.3, 28.3; **HRMS** (ESI-Orbitrap): calcd. for [C<sub>28</sub>H<sub>34</sub>N<sub>3</sub>O<sub>4</sub>]<sup>+</sup> (M + H<sup>+</sup>): 476.2544, found: 476.2544.

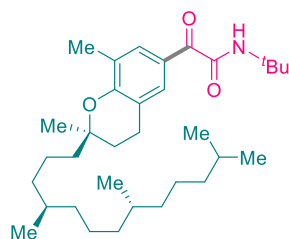

74

***N*-(*tert*-butyl)-2-((*R*)-2,8-dimethyl-2-((4*R*,8*R*)-4,8,12-trimethyltridecyl)chroman-6-yl)-2-oxoacetamide (74).** Yellow oil, 41.1 mg, 40% yield (From aryl iodide derivative of  $\delta$ -Vitamin E). **<sup>1</sup>H-NMR** (CDCl<sub>3</sub>, 400 MHz):  $\delta$  8.10 (s, 1H), 7.96 (s, 1H), 6.98 (br s, 1H), 2.79 (t,  $J$  = 6.6 Hz, 2H), 2.18 (s, 3H), 1.92 – 1.69 (m, 2H), 1.63 – 0.97 (m, 33H), 0.94 – 0.74 (m, 12H); **<sup>13</sup>C-NMR** (CDCl<sub>3</sub>, 101 MHz):  $\delta$  186.9, 162.2, 158.4, 132.1, 131.7, 126.7, 124.7, 120.3, 78.0, 51.5, 40.3, 39.5, 37.6, 37.5, 37.5, 37.4, 32.9, 32.8, 31.0, 28.6, 28.1, 24.9, 24.6, 24.5, 22.9, 22.8, 22.3, 21.1, 19.9, 19.8, 16.2; **HRMS** (ESI-Orbitrap): calcd. for [C<sub>33</sub>H<sub>56</sub>NO<sub>3</sub>]<sup>+</sup> (M + H<sup>+</sup>): 514.4255, found: 514.4263.

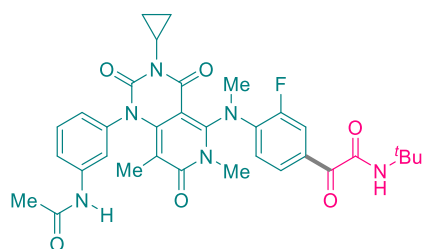

75

**2-(4-((1-(3-acetamidophenyl)-3-cyclopropyl-6,8-dimethyl-2,4,7-trioxo-1,2,3,4,6,7-hexahydropyrido[4,3-*d*]pyrimidin-5-yl)(methyl)amino)-3-fluorophenyl)-*N*-(*tert*-butyl)-2-oxoacetamide (75).** Yellow solid, 121.0 mg, 96% yield (From aryl iodide derivative of Trametinib), m.p. = 167.6 – 169.9 °C. **<sup>1</sup>H-NMR** (CDCl<sub>3</sub>, 400 MHz):  $\delta$  11.34 – 11.14 (m, 1H), 7.54 (d,  $J$  = 11.1 Hz, 1H), 7.47 (d,  $J$  = 8.3 Hz, 1H), 7.41 (t,  $J$  = 8.1 Hz, 1H), 7.23 – 7.10 (m, 3H), 6.86 (t,  $J$  = 8.0 Hz, 1H), 6.31 (s, 1H), 3.18 (s, 3H), 3.10 (s, 3H), 2.63 (dt,  $J$  = 10.7, 3.6 Hz, 1H), 1.83 (s, 3H), 1.37 (s, 9H), 1.32 (s, 3H), 1.03 (d,  $J$  = 6.9 Hz, 2H), 0.70 (s, 2H); **<sup>13</sup>C-NMR** (CDCl<sub>3</sub>, 101 MHz):  $\delta$  170.4, 164.7, 164.6, 164.6, 163.8, 154.8 (d,  $J$  = 249.7 Hz), 151.9, 151.5, 145.1, 144.8, 141.1, 134.3, 134.2, 130.4 (d,  $J$  = 12.1 Hz), 130.1, 128.1, 126.8, 123.3, 123.2, 123.0, 115.5 (d,  $J$  = 20.7 Hz), 110.1, 103.6, 90.1, 52.1, 37.3, 34.8, 28.9, 25.3, 22.7,

13.8, 8.5; **HRMS** (ESI-Orbitrap): calcd. for  $[\text{C}_{33}\text{H}_{36}\text{FN}_6\text{O}_6]^+$  ( $\text{M} + \text{H}^+$ ): 653.2494, found: 653.2503.

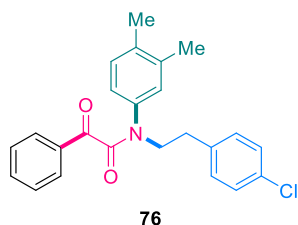

***N*-(4-chlorophenethyl)-*N*-(3,4-dimethylphenyl)-2-oxo-2-phenylacetamide (76).** White solid, 20.0 mg, 25% yield, m.p. = 113.2 – 114.6 °C. **<sup>1</sup>H-NMR** ( $\text{CDCl}_3$ , 400 MHz):  $\delta$  7.62 (d,  $J$  = 7.2 Hz, 2H), 7.55 (t,  $J$  = 7.4 Hz, 1H), 7.40 (t,  $J$  = 7.7 Hz, 2H), 7.31 (d,  $J$  = 8.3 Hz, 2H), 7.21 (d,  $J$  = 8.3 Hz, 2H), 6.93 (d,  $J$  = 7.9 Hz, 1H), 6.77 (s, 1H), 6.68 (d,  $J$  = 7.9 Hz, 1H), 4.18 (t,  $J$  = 7.4 Hz, 2H), 2.91 (t,  $J$  = 7.4 Hz, 2H), 2.16 (s, 3H), 2.09 (s, 3H); **<sup>13</sup>C-NMR** ( $\text{CDCl}_3$ , 101 MHz):  $\delta$  190.7, 167.0, 138.3, 137.2, 136.9, 136.7, 134.3, 133.7, 132.5, 130.7, 130.5, 129.5, 128.8, 128.7, 125.1, 48.9, 33.1, 19.8, 19.5; **HRMS** (ESI-Orbitrap): calcd. for  $[\text{C}_{24}\text{H}_{23}\text{ClNO}_2]^+$  ( $\text{M} + \text{H}^+$ ): 392.1412, found: 392.1411.

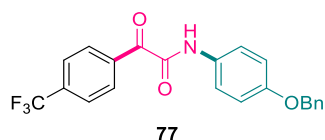

***N*-(4-(benzyloxy)phenyl)-2-oxo-2-(4-(trifluoromethyl)phenyl)acetamide (77).** Yellow solid, 24.7 mg, 31% yield, m.p. = 127.1 – 128.1 °C. **<sup>1</sup>H-NMR** ( $\text{CDCl}_3$ , 400 MHz):  $\delta$  8.89 (br s, 1H), 8.52 (d,  $J$  = 8.2 Hz, 2H), 7.77 (d,  $J$  = 8.3 Hz, 2H), 7.62 (d,  $J$  = 8.8 Hz, 2H), 7.48 – 7.30 (m, 5H), 7.01 (d,  $J$  = 8.8 Hz, 2H), 5.08 (s, 2H); **<sup>13</sup>C-NMR** ( $\text{CDCl}_3$ , 101 MHz):  $\delta$  186.8, 158.0, 156.5, 136.8, 136.0, 135.5 (q,  $J$  = 65.3, 32.6 Hz), 131.9, 129.8, 128.8, 128.2, 127.6, 125.6 (q,  $J$  = 3.7 Hz), 123.6 (q,  $J$  = 545.8, 272.9 Hz), 121.7, 115.5, 70.4; **HRMS** (ESI-Orbitrap): calcd. for  $[\text{C}_{22}\text{H}_{17}\text{F}_3\text{NO}_3]^+$  ( $\text{M} + \text{H}^+$ ): 400.1155, found: 400.1157.



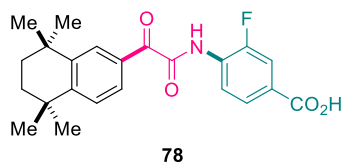

**3-fluoro-4-(2-oxo-2-(5,5,8,8-tetramethyl-5,6,7,8-tetrahydronaphthalen-2-yl)acetamido) benzoic acid (78).**

White solid, 18.3 mg, 23% yield, m.p. = 33.2 – 34.9 °C. **<sup>1</sup>H-NMR** (DMSO-*d*<sub>6</sub>, 400 MHz): δ 13.18 (br s, 1H), 11.07 (s, 1H), 8.14 (t, *J* = 7.8 Hz, 1H), 7.99 (s, 1H), 7.85 (d, *J* = 8.1 Hz, 1H), 7.79 (d, *J* = 10.9 Hz, 1H), 7.74 (d, *J* = 8.1 Hz, 1H), 7.57 (d, *J* = 8.3 Hz, 1H), 1.66 (s, 4H), 1.26 (s, 12H); **<sup>13</sup>C-NMR** (DMSO-*d*<sub>6</sub>, 101 MHz): δ 188.7, 166.0, 164.7, 153.4 (d, *J* = 247.8 Hz), 152.5, 145.5, 130.1, 129.0, 128.8, 127.9 (d, *J* = 5.5 Hz), 127.6, 127.2, 126.1, 124.0, 116.5 (d, *J* = 21.4 Hz), 34.7, 34.1, 31.5, 31.2; **HRMS** (ESI-Orbitrap): calcd. for [C<sub>23</sub>H<sub>25</sub>FN<sub>2</sub>O<sub>4</sub>]<sup>+</sup> (M + H<sup>+</sup>): 398.1762, found: 398.1789.

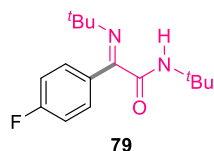

***N*-(tert-butyl)-2-(tert-butylimino)-2-(4-fluorophenyl)acetamide (79).** Yellow solid, 58% yield by recrystallization, m.p. = 122.4 – 124.0 °C. **<sup>1</sup>H-NMR** (DMSO-*d*<sub>6</sub>, 400 MHz): δ 8.32 (s, 1H), 7.85 – 7.66 (m, 2H), 7.24 (t, *J* = 8.9 Hz, 2H), 1.36 (s, 9H), 1.34 (s, 9H); **<sup>13</sup>C-NMR** (DMSO-*d*<sub>6</sub>, 101 MHz): δ 167.2, 163.2 (d, *J* = 247.2 Hz), 156.5, 134.1 (d, *J* = 2.9 Hz), 129.1 (d, *J* = 8.7 Hz), 115.1 (d, *J* = 21.7 Hz), 56.9, 51.1, 30.3, 28.2; **<sup>19</sup>F NMR** (DMSO-*d*<sub>6</sub>, 376 MHz) δ -111.33 (s, 1F). **HRMS** (ESI-Orbitrap): calcd. for [C<sub>16</sub>H<sub>24</sub>FN<sub>2</sub>O]<sup>+</sup> (M + H<sup>+</sup>): 279.1867, found: 279.1878.

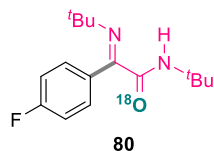

***N*-(tert-butyl)-2-(tert-butylimino)-2-(4-fluorophenyl)acetamide-<sup>18</sup>O (80).** Yellow solid, 64% yield by <sup>19</sup>F NMR, m.p. = 128.9 – 130.4 °C. **HRMS** (ESI-Orbitrap): calcd. for [C<sub>16</sub>H<sub>24</sub>FN<sub>2</sub><sup>18</sup>O]<sup>+</sup> (M + H<sup>+</sup>): 281.1910, found: 279.1921.

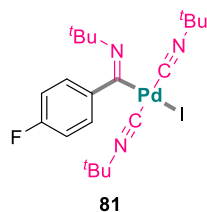

**Bis((*tert*-butyl- $\lambda^4$ -azanylidene)methyl)((*tert*-butylimino)(4-fluorophenyl)methyl) palladium (IV) iodide (81).** Yellow solid, 57.7 mg, 50 % yield, m.p. = 152.1 – 154.0 °C.  **$^1\text{H}$ -NMR** ( $\text{CDCl}_3$ , 400 MHz):  $\delta$  7.83 (dd,  $J$  = 8.7, 5.7 Hz, 2H), 6.99 (t,  $J$  = 8.7 Hz, 2H), 1.55 (s, 9H), 1.38 (s, 18H);  **$^{13}\text{C}$ -NMR** ( $\text{CDCl}_3$ , 101 MHz):  $\delta$  165.3 (d,  $J$  = 246.9 Hz), 161.6, 141.4 (d,  $J$  = 3.0 Hz), 130.6 (d,  $J$  = 8.2 Hz), 114.7 (d,  $J$  = 21.5 Hz), 58.0, 57.3, 31.3, 29.8;  **$^{19}\text{F}$  NMR** ( $\text{CDCl}_3$ , 376 MHz)  $\delta$  -113.33 (s, 1F); **HRMS** (ESI-Orbitrap): calcd. for  $[\text{C}_{21}\text{H}_{32}\text{FIN}_3\text{Pd}]^+$  ( $\text{M} + \text{H}^+$ ): 578.0654, found: 578.0678.

## 7. Gram-scale experiments

### Synthesis of compound **3** from bromobenzene

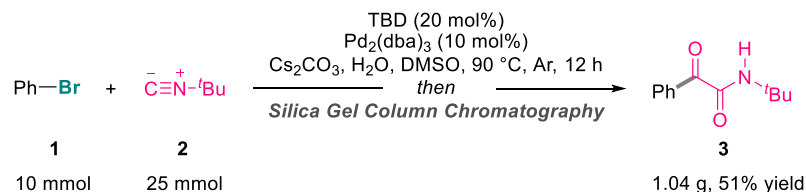

A 100 mL oven-dried single-necked flask equipped with a stir bar was charged with bromobenzene (**1**, 1.05 mL, 10.0 mmol, 1.0 equiv), TBD (278.4 mg, 20 mol%),  $\text{Pd}_2(\text{dba})_3$  (915.7 mg, 10 mol%),  $\text{Cs}_2\text{CO}_3$  (6.52 g, 20.0 mmol, 2.0 equiv),  $\text{H}_2\text{O}$  (5.0 mL) and extra dry DMSO (50 mL). The vial was evacuated and backfilled with argon for three times and then *tert*-butyl isocyanide (**2**, 2.83 mL, 25 mmol) was added by syringe under argon. The vial was then sealed and was stirred at 90 °C (oil bath) for 12 h. After the completion of the reaction monitored by TLC (thin layer chromatography), the reaction mixture was cooled to the room temperature and treated with water (80 mL), extracted with  $\text{CH}_2\text{Cl}_2$  (3 × 80 mL), washed with brine (2 × 200 mL). Then the organic layer was dried over anhydrous  $\text{Na}_2\text{SO}_4$ , filtered and concentrated. The residue was purified by flash column chromatography on silica gel and eluted with petroleum ether/ethyl acetate (20:1 – 5:1) to afford the product **3** (1.04 g, 51% yield).

### Synthesis of compound **3** from iodobenzene

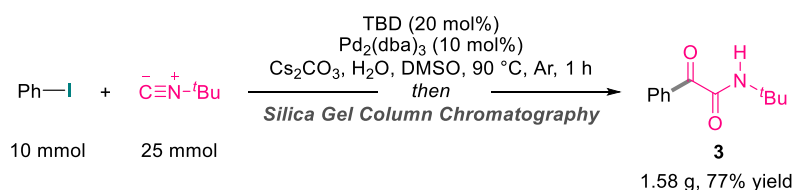

A 100 mL oven-dried single-necked flask equipped with a stir bar was charged with iodobenzene (1.12 mL, 10.0 mmol, 1.0 equiv), TBD (278.4 mg, 20 mol%),  $\text{Pd}_2(\text{dba})_3$  (915.7 mg, 10 mol%),  $\text{Cs}_2\text{CO}_3$  (6.52 g, 20.0 mmol, 2.0 equiv),  $\text{H}_2\text{O}$  (5.0 mL) and extra dry DMSO (50 mL). The flask was evacuated and backfilled with argon for three times and then *tert*-butyl isocyanide (2.83 mL, 25 mmol) was added by syringe under argon. The flask was

then sealed and was stirred at 90 °C (oil bath) for 1 h. After the completion of the reaction monitored by TLC (thin layer chromatography), the reaction mixture was cooled to the room temperature and treated with water (80 mL), extracted with CH<sub>2</sub>Cl<sub>2</sub> (3 × 80 mL), washed with brine (2 × 200 mL). Then the organic layer was dried over anhydrous Na<sub>2</sub>SO<sub>4</sub>, filtered and concentrated. The residue was purified by flash column chromatography on silica gel and eluted with petroleum ether/ethyl acetate (20:1 – 5:1) to afford the product **3** (1.58 g, 77% yield).

*Synthesis of compound 3 from iodobenzene with 5 mol% Pd<sub>2</sub>(dba)<sub>3</sub>*

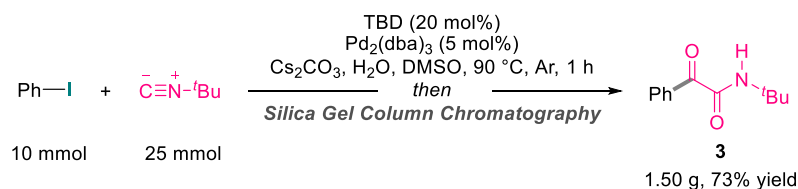

A 100 mL oven-dried single-necked flask equipped with a stir bar was charged with iodobenzene (1.12 mL, 10.0 mmol, 1.0 equiv), TBD (278.4 mg, 20 mol%), Pd<sub>2</sub>(dba)<sub>3</sub> (457.9 mg, 5 mol%), Cs<sub>2</sub>CO<sub>3</sub> (6.52 g, 20.0 mmol, 2.0 equiv), H<sub>2</sub>O (5.0 mL) and extra dry DMSO (50 mL). The flask was evacuated and backfilled with argon for three times and then *tert*-butyl isocyanide (2.83 mL, 25 mmol) was added by syringe under argon. The flask was then sealed and was stirred at 90 °C (oil bath) for 1 h. After the completion of the reaction monitored by TLC (thin layer chromatography), the reaction mixture was cooled to the room temperature and treated with water (80 mL), extracted with CH<sub>2</sub>Cl<sub>2</sub> (3 × 80 mL), washed with brine (2 × 200 mL). Then the organic layer was dried over anhydrous Na<sub>2</sub>SO<sub>4</sub>, filtered and concentrated. The residue was purified by flash column chromatography on silica gel and eluted with petroleum ether/ethyl acetate (20:1 – 5:1) to afford the product **3** (1.50 g, 73% yield).

## 8. Mechanistic studies

### 8.1 Control experiment

#### 8.1.1 Crossover reaction

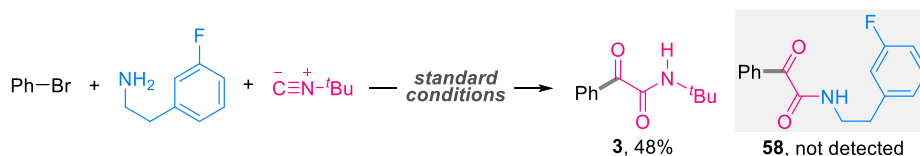

A 4-mL flame-dried vial with a magnetic stir bar was charged with bromobenzene (20.9  $\mu\text{L}$ , 0.2 mmol), 2-(3-fluorophenyl)ethan-1-amine (65.3  $\mu\text{L}$ , 0.5 mmol, 2.5 equiv), TBD (5.6 mg, 20 mol%),  $\text{Pd}_2(\text{dba})_3$  (18.3 mg, 10 mol%),  $\text{Cs}_2\text{CO}_3$  (130.3 mg, 0.4 mmol),  $\text{H}_2\text{O}$  (100  $\mu\text{L}$ ) and extra dry DMSO (1.0 mL). The vial was evacuated and backfilled with argon for three times and then *tert*-butyl isocyanide (56.6  $\mu\text{L}$ , 0.5 mmol) was added by syringe under argon. The vial was then sealed and was stirred at 90  $^\circ\text{C}$  (oil bath) for 12 h. After the completion of the reaction monitored by TLC (thin layer chromatography), the reaction mixture was cooled to the room temperature and treated with water (15 mL), extracted with  $\text{CH}_2\text{Cl}_2$  (3  $\times$  15 mL), washed with brine (2  $\times$  40 mL). Then the organic layer was dried over anhydrous  $\text{Na}_2\text{SO}_4$ , filtered and concentrated. The residue was purified by flash column chromatography on silica gel and eluted with petroleum ether/ethyl acetate (30:1 – 10:1) to afford the product **3** (19.7 mg, 48% yield), the compound **58** was not detected.

#### 8.1.2 The model reaction in the absence of TBD

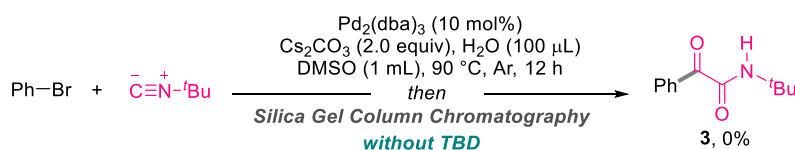

A 4-mL flame-dried vial with a magnetic stir bar was charged with bromobenzene (20.9  $\mu\text{L}$ , 0.2 mmol),  $\text{Pd}_2(\text{dba})_3$  (18.3 mg, 10 mol%),  $\text{Cs}_2\text{CO}_3$  (130.3 mg, 0.4 mmol),  $\text{H}_2\text{O}$  (100  $\mu\text{L}$ ) and extra dry DMSO (1.0 mL). The vial was evacuated and backfilled with argon for three times and then *tert*-butyl isocyanide (56.6  $\mu\text{L}$ , 0.5 mmol) was added by syringe under argon. The vial was then sealed and was stirred at 90  $^\circ\text{C}$  (oil bath) for 12 h. After the completion of the reaction monitored by TLC (thin layer chromatography), the reaction mixture was

cooled to the room temperature and treated with water (15 mL), extracted with CH<sub>2</sub>Cl<sub>2</sub> (3 × 15 mL), washed with brine (2 × 40 mL). Then the organic layer was dried over anhydrous Na<sub>2</sub>SO<sub>4</sub>, filtered and concentrated. The residue was purified by flash column chromatography on silica gel and eluted with petroleum ether/ethyl acetate (30:1 – 10:1). However, product **3** was not obtained (0% yield).

#### 8.1.3 The model reaction in the absence of Cs<sub>2</sub>CO<sub>3</sub>

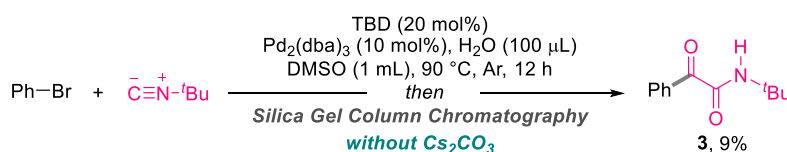

A 4-mL flame-dried vial with a magnetic stir bar was charged with bromobenzene (20.9 μL, 0.2 mmol), TBD (5.6 mg, 20 mol%), Pd<sub>2</sub>(dba)<sub>3</sub> (18.3 mg, 10 mol%), H<sub>2</sub>O (100 μL) and extra dry DMSO (1.0 mL). The vial was evacuated and backfilled with argon for three times and then *tert*-butyl isocyanide (56.6 μL, 0.5 mmol) was added by syringe under argon. The vial was then sealed and was stirred at 90 °C (oil bath) for 12 h. After the completion of the reaction monitored by TLC (thin layer chromatography), the reaction mixture was cooled to the room temperature and treated with water (15 mL), extracted with CH<sub>2</sub>Cl<sub>2</sub> (3 × 15 mL), washed with brine (2 × 40 mL). Then the organic layer was dried over anhydrous Na<sub>2</sub>SO<sub>4</sub>, filtered and concentrated. The residue was purified by flash column chromatography on silica gel and eluted with petroleum ether/ethyl acetate (30:1 – 10:1) to afford the product **3** (3.7 mg, 9% yield).

#### 8.1.4 The model reaction by replacing TBD with MTBD

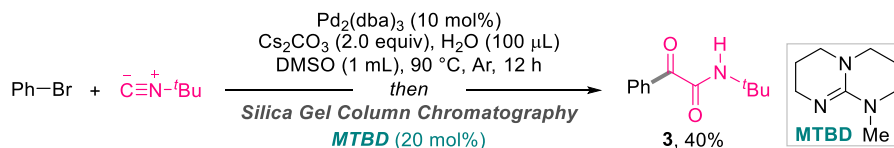

A 4-mL flame-dried vial with a magnetic stir bar was charged with bromobenzene (20.9 μL, 0.2 mmol), MTBD (6.1 mg, 20 mol%), Pd<sub>2</sub>(dba)<sub>3</sub> (18.3 mg, 10 mol%), Cs<sub>2</sub>CO<sub>3</sub> (130.3 mg, 0.4 mmol), H<sub>2</sub>O (100 μL) and extra dry DMSO (1.0 mL). The vial was evacuated and backfilled with argon for three times and then *tert*-butyl isocyanide (56.6 μL, 0.5 mmol) was

added by syringe under argon. The vial was then sealed and was stirred at 90 °C (oil bath) for 12 h. After the completion of the reaction monitored by TLC (thin layer chromatography), the reaction mixture was cooled to the room temperature and treated with water (15 mL), extracted with CH<sub>2</sub>Cl<sub>2</sub> (3 × 15 mL), washed with brine (2 × 40 mL). Then the organic layer was dried over anhydrous Na<sub>2</sub>SO<sub>4</sub>, filtered and concentrated. The residue was purified by flash column chromatography on silica gel and eluted with petroleum ether/ethyl acetate (30:1 – 10:1) to afford the product **3** (16.4 mg, 40% yield).

## 8.2 Isotope labeling experiment

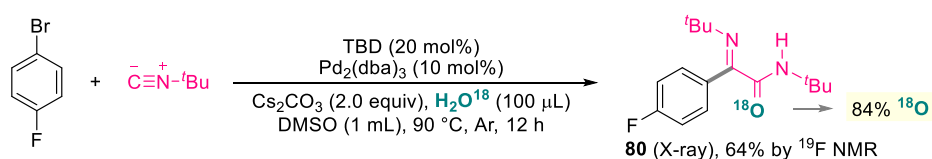

A 4-mL flame-dried vial with a magnetic stir bar was charged with 1-bromo-4-fluorobenzene (22.0  $\mu\text{L}$ , 0.2 mmol), TBD (5.6 mg, 20 mol%),  $\text{Pd}_2(\text{dba})_3$  (18.3 mg, 10 mol%),  $\text{Cs}_2\text{CO}_3$  (130.3 mg, 0.4 mmol),  $\text{H}_2^{18}\text{O}$  (100  $\mu\text{L}$ ) and extra dry DMSO (1.0 mL). The vial was evacuated and backfilled with argon for three times and then *tert*-butyl isocyanide (56.6  $\mu\text{L}$ , 0.5 mmol) was added by syringe under argon. The vial was then sealed and was stirred at 90 °C (oil bath) for 12 h. After the completion of the reaction monitored by TLC (thin layer chromatography), the reaction mixture was cooled to the room temperature and added with benzotrifluoride (internal standard, 24.6  $\mu\text{L}$ , 0.2 mmol), stirred for additional 1 min at room temperature, filtered through a filter membrane. Then the yield of compound **80** was given in 64% yield determined by  $^{19}\text{F}$ -NMR.

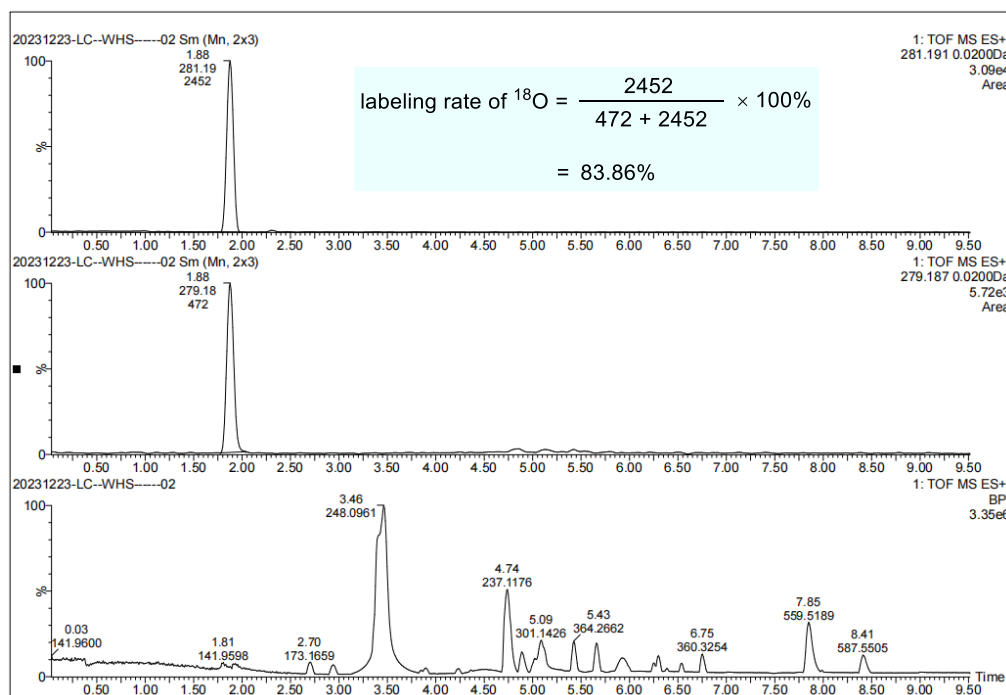

**Fig. S2** Content determination of  $^{18}\text{O}$  labelled midbody

### 8.3 Control experiment with imidoypalladium complex

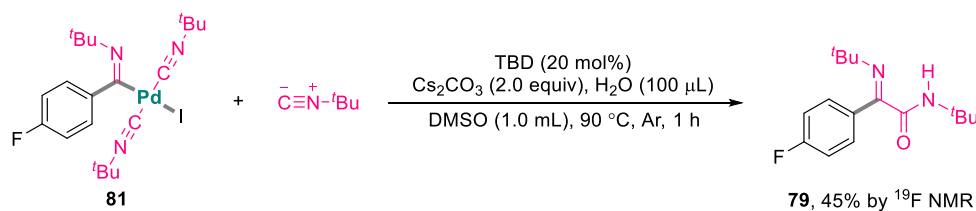

A 4-mL flame-dried vial with a magnetic stir bar was charged with **81** (115.4 mg, 0.2 mmol), TBD (5.6 mg, 20 mol%),  $\text{Cs}_2\text{CO}_3$  (130.3 mg, 0.4 mmol),  $\text{H}_2\text{O}$  (100  $\mu\text{L}$ ) and extra dry DMSO (1.0 mL). The vial was evacuated and backfilled with argon for three times and then *tert*-butyl isocyanide (22.6  $\mu\text{L}$ , 0.2 mmol) was added by syringe under argon. The vial was then sealed and was stirred at 90  $^\circ\text{C}$  (oil bath) for 1 h. After the completion of the reaction monitored by TLC (thin layer chromatography), the reaction mixture was cooled to the room temperature and added with benzotrifluoride (internal standard, 24.6  $\mu\text{L}$ , 0.2 mmol), stirred for additional 1 min at room temperature, filtered through a filter membrane. Then the yield of compound **79** was given in 45% determined by  $^{19}\text{F}$ -NMR.



#### 8.4 Control experiment with $\alpha$ -ketoimine amide

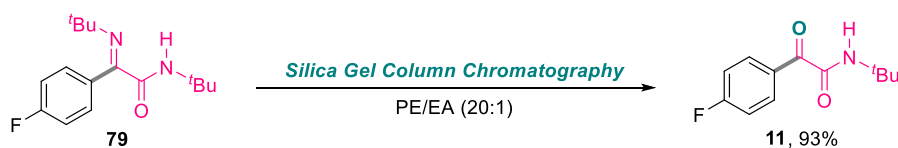

The sample **79** (55.6 mg, 0.2 mmol) was eluted by silica gel column chromatography with petroleum ether/ethyl acetate (20:1) to give the product **11** (41.3 mg, 93% yield).

#### 8.5 Hammett's correlation

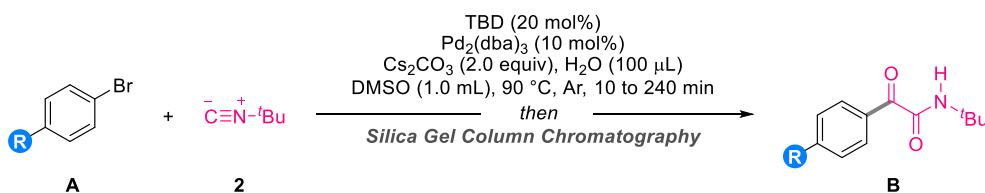

A 4-mL flame-dried vial with a magnetic stir bar was charged with substrate (**A1** – **A7**), TBD (5.6 mg, 20 mol%),  $\text{Pd}_2(\text{dba})_3$  (18.3 mg, 10 mol%),  $\text{Cs}_2\text{CO}_3$  (130.3 mg, 0.4 mmol),  $\text{H}_2\text{O}$  (100  $\mu\text{L}$ ) and extra dry DMSO (1.0 mL). The vial was evacuated and backfilled with argon for three times and then *tert*-butyl isocyanide (56.6  $\mu\text{L}$ , 0.5 mmol) was added by syringe under argon. The vial was then sealed and was stirred at 90 °C (oil bath) for 10 min – 240 min. After the completion of the reaction monitored by TLC (thin layer chromatography), the reaction mixture was cooled to the room temperature and treated with water (15 mL), extracted with  $\text{CH}_2\text{Cl}_2$  (3  $\times$  15 mL), washed with brine (2  $\times$  40 mL). Then the organic layer was dried over anhydrous  $\text{Na}_2\text{SO}_4$ , filtered and concentrated.<sup>25,26</sup> The residue was purified by flash column chromatography on silica gel and eluted with petroleum ether/ethyl acetate (30:1 – 5:1) to afford the corresponding product.

**Table S6. Raw data of Hammett correlation experiment**

| Substrate (R) | Weight of <b>A</b> (mg) | Time (min) | Weight of <b>B</b> (mg) | Yield of <b>B</b> (%) |
|---------------|-------------------------|------------|-------------------------|-----------------------|
| A1 (H)        | 31.4                    | 60         | 4.5                     | 11.0                  |
| A1 (H)        | 31.4                    | 120        | 5.5                     | 13.4                  |
| A1 (H)        | 31.4                    | 180        | 9.2                     | 22.4                  |
| A1 (H)        | 31.4                    | 240        | 11.1                    | 27.1                  |

|                       |      |     |      |      |
|-----------------------|------|-----|------|------|
| A2 (F)                | 35.0 | 60  | 3.9  | 8.7  |
| A2 (F)                | 35.0 | 120 | 10.4 | 23.3 |
| A2 (F)                | 35.0 | 180 | 14.1 | 31.6 |
| A2 (F)                | 35.0 | 240 | 19.8 | 44.4 |
| A3 (Cl)               | 38.3 | 60  | 6.8  | 14.2 |
| A3 (Cl)               | 38.3 | 120 | 11.5 | 24.1 |
| A3 (Cl)               | 38.3 | 180 | 18.7 | 39.1 |
| A3 (Cl)               | 38.3 | 240 | 27.6 | 57.7 |
| A4 (CF <sub>3</sub> ) | 45.0 | 30  | 14.6 | 26.7 |
| A4 (CF <sub>3</sub> ) | 45.0 | 60  | 22.9 | 41.9 |
| A4 (CF <sub>3</sub> ) | 45.0 | 90  | 30.4 | 55.7 |
| A4 (CF <sub>3</sub> ) | 45.0 | 120 | 41.5 | 76.0 |
| A5 (CN)               | 36.4 | 10  | 3.6  | 7.8  |
| A5 (CN)               | 36.4 | 20  | 7.2  | 15.6 |
| A5 (CN)               | 36.4 | 30  | 12   | 26.1 |
| A5 (CN)               | 36.4 | 40  | 17.5 | 38.0 |
| A6 (Me)               | 34.2 | 60  | 1.8  | 4.1  |
| A6 (Me)               | 34.2 | 120 | 3.7  | 8.4  |
| A6 (Me)               | 34.2 | 180 | 5.8  | 13.2 |
| A6 (Me)               | 34.2 | 240 | 7.6  | 17.3 |
| A7 (OMe)              | 37.4 | 60  | 3.8  | 8.1  |
| A7 (OMe)              | 37.4 | 120 | 4.6  | 9.8  |
| A7 (OMe)              | 37.4 | 180 | 7.1  | 15.1 |
| A7 (OMe)              | 37.4 | 240 | 9.7  | 20.6 |

**Table S7. Plot of Hammett correlation experiment**

| Substrate (R) | Rate constant | $k_R/k_H$ | Log ( $k_R/k_H$ ) | Substitution constant ( $\sigma_P$ ) |
|---------------|---------------|-----------|-------------------|--------------------------------------|
| A1 (H)        | 0.0955        | 1         | 0                 | 0                                    |
| A2 (F)        | 0.1923        | 2.01      | 0.3               | 0.06                                 |

|                       |        |       |       |       |
|-----------------------|--------|-------|-------|-------|
| A3 (Cl)               | 0.2425 | 2.54  | 0.4   | 0.28  |
| A4 (CF <sub>3</sub> ) | 0.539  | 5.64  | 0.75  | 0.54  |
| A5 (CN)               | 1.011  | 10.59 | 1.02  | 0.66  |
| A6 (Me)               | 0.074  | 0.775 | -0.11 | -0.17 |
| A7 (OMe)              | 0.0713 | 0.747 | -0.13 | -0.27 |

The individual rate constants were then plotted against the substituent constants ( $\sigma_m$ ) and a hammett correlation with a negative slope was obtained ( $\rho = 1.235$ ,  $R^2 = 0.961$ ).

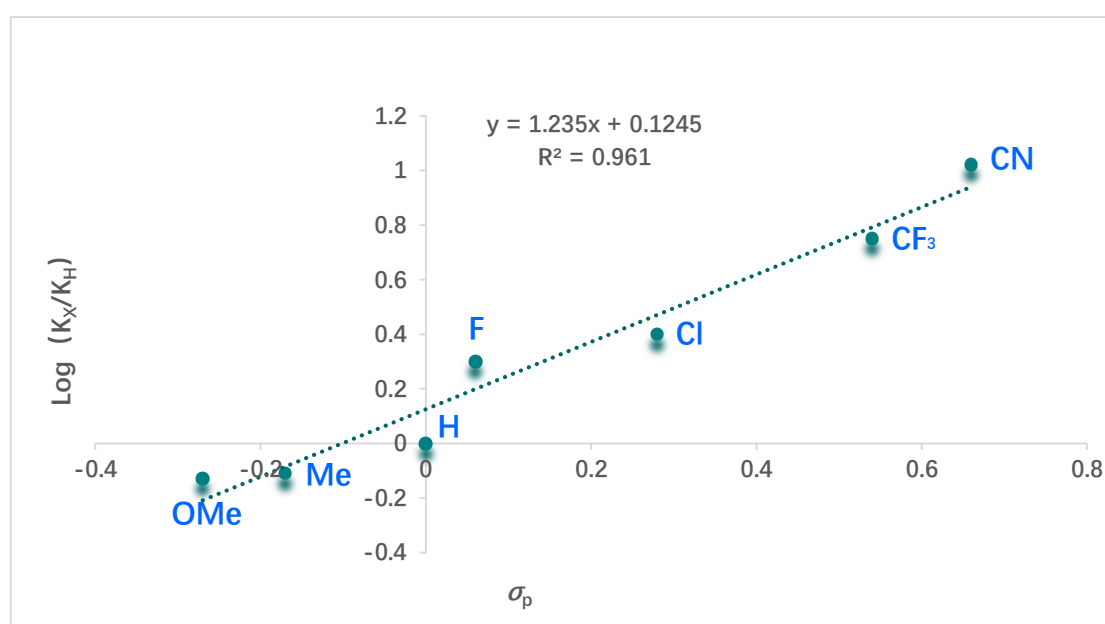

**Fig. S3** Hammett correlation plot

## 8.6 Kinetic Studies under standard reaction conditions

### 8.6.1 Dependence of the reaction rate on concentration of *p*-bromofluorobenzene (**1i**)

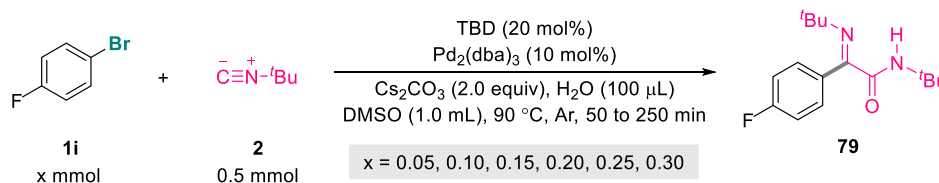

General procedure: **1i** (x mmol), TBD (5.6 mg, 20 mol%), Pd<sub>2</sub>(dba)<sub>3</sub> (18.3 mg, 10 mol%), Cs<sub>2</sub>CO<sub>3</sub> (130.3 mg, 0.4 mmol), H<sub>2</sub>O (100 µL) and extra dry DMSO (1.0 mL). The vial was evacuated and backfilled with argon for three times and then *tert*-butyl isocyanide **2** (56.6 µL, 0.5 mmol) was added by syringe under argon. The vial was then sealed and was stirred at 90 °C (oil bath) for 12 h. One of the reaction vials was cooled to room

temperature every 50 minutes. The reaction mixture was added with benzotrifluoride (internal standard, 24.6  $\mu\text{L}$ , 0.2 mmol), stirred for additional 1 min at room temperature, and filtered through a filter membrane. The yield of **79** was determined by  $^{19}\text{F}$ -NMR using benzotrifluoride as an internal standard.<sup>27,28</sup>

Kinetic profiles of different initial concentrations of **1i** were collected (Fig. S4). The rate was plotted against the concentration of **1i** (Fig. S5).

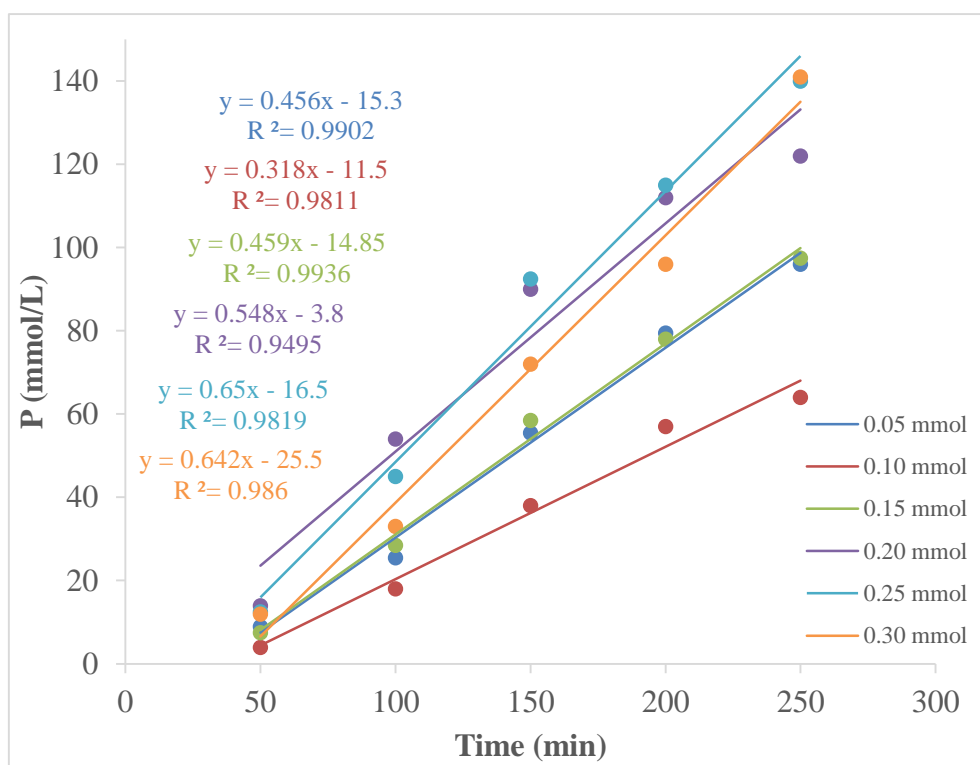

**Fig. S4** Reaction profiles for **1i**

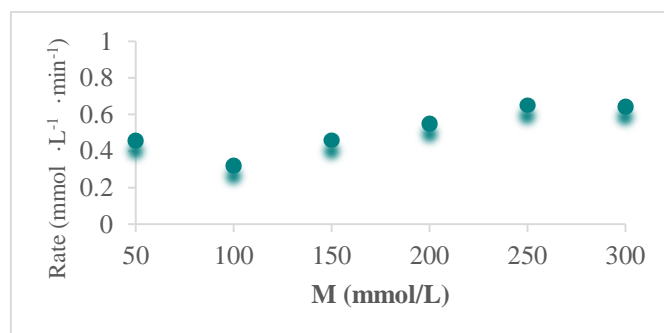

**Fig. S5** Initial reaction rate dependence on concentration of **1i**

#### 8.6.2 Dependence of the reaction rate on concentration of *tert*-butyl isocyanide (**2**)

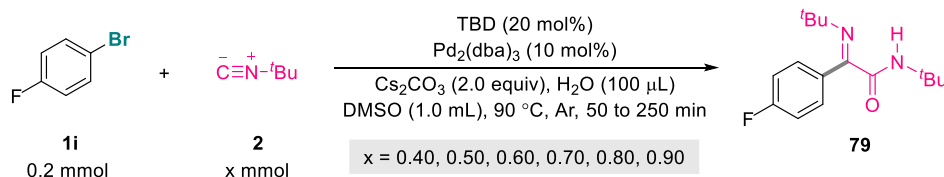

General procedure: **1i** (22.0 µL, 0.2 mmol), TBD (5.6 mg, 20 mol%), Pd<sub>2</sub>(dba)<sub>3</sub> (18.3 mg, 10 mol%), Cs<sub>2</sub>CO<sub>3</sub> (130.3 mg, 0.4 mmol), H<sub>2</sub>O (100 µL) and extra dry DMSO (1.0 mL). The vial was evacuated and backfilled with argon for three times and then *tert*-butyl isocyanide **2** (x mmol) was added by syringe under argon. The vial was then sealed and was stirred at 90 °C (oil bath) for 12 h. One of the reaction vials was cooled to room temperature every 50 minutes. The reaction mixture was added with benzotrifluoride (internal standard, 24.6 µL, 0.2 mmol), stirred for additional 1 min at room temperature, and filtered through a filter membrane. The yield of **79** was determined by <sup>19</sup>F-NMR using benzotrifluoride as an internal standard.<sup>27,28</sup>

Kinetic profiles of different initial concentrations of **2** were collected (Fig. S6). The rate was plotted against the concentration of **2** (Fig. S7).

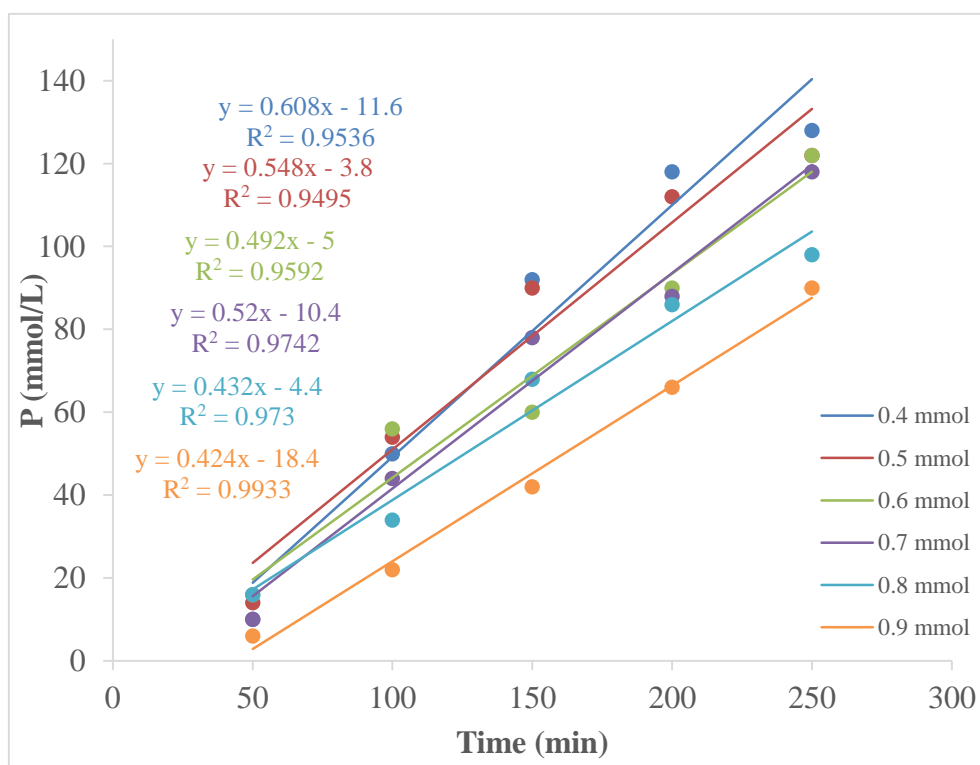

**Fig. S6** Reaction profiles for **2**

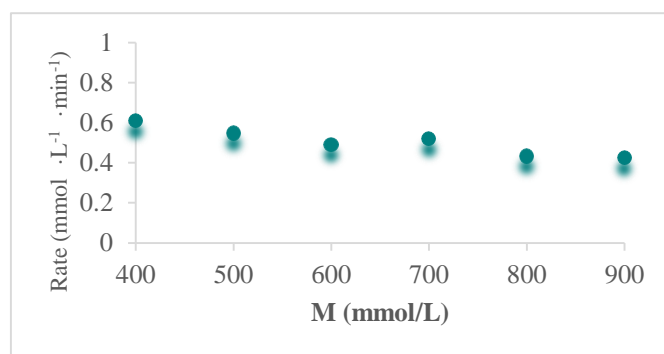

**Fig. S7** Initial reaction rate dependence on concentration of **2**

### 8.6.3 Dependence of the reaction rate on concentration of **H<sub>2</sub>O**

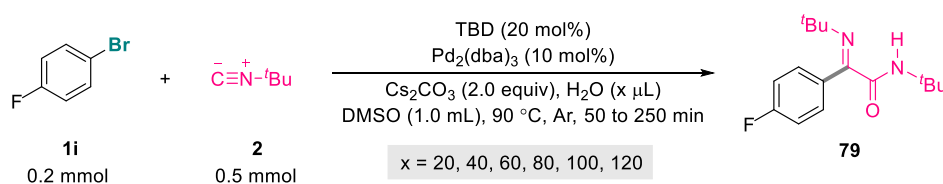

General procedure: **1i** (22.0  $\mu\text{L}$ , 0.2 mmol), TBD (5.6 mg, 20 mol%),  $\text{Pd}_2(\text{dba})_3$  (18.3 mg, 10 mol%),  $\text{Cs}_2\text{CO}_3$  (130.3 mg, 0.4 mmol), **H<sub>2</sub>O** ( $x \mu\text{L}$ ) and extra dry DMSO (1.0 mL). The vial was evacuated and backfilled with argon for three times and then *tert*-butyl isocyanide **2** (56.6  $\mu\text{L}$ , 0.5 mmol) was added by syringe under argon. The vial was then sealed and was stirred at 90 °C (oil bath) for 12 h. One of the reaction vials was cooled to room temperature every 50 minutes. The reaction mixture was added with benzotrifluoride (internal standard, 24.6  $\mu\text{L}$ , 0.2 mmol), stirred for additional 1 min at room temperature, and filtered through a filter membrane. The yield of **79** was determined by  $^{19}\text{F}$ -NMR using benzotrifluoride as an internal standard.<sup>27,28</sup>

Kinetic profiles of different initial concentrations of **H<sub>2</sub>O** were collected (Fig. S8). The rate was plotted against the concentration of **H<sub>2</sub>O** (Fig. S9).

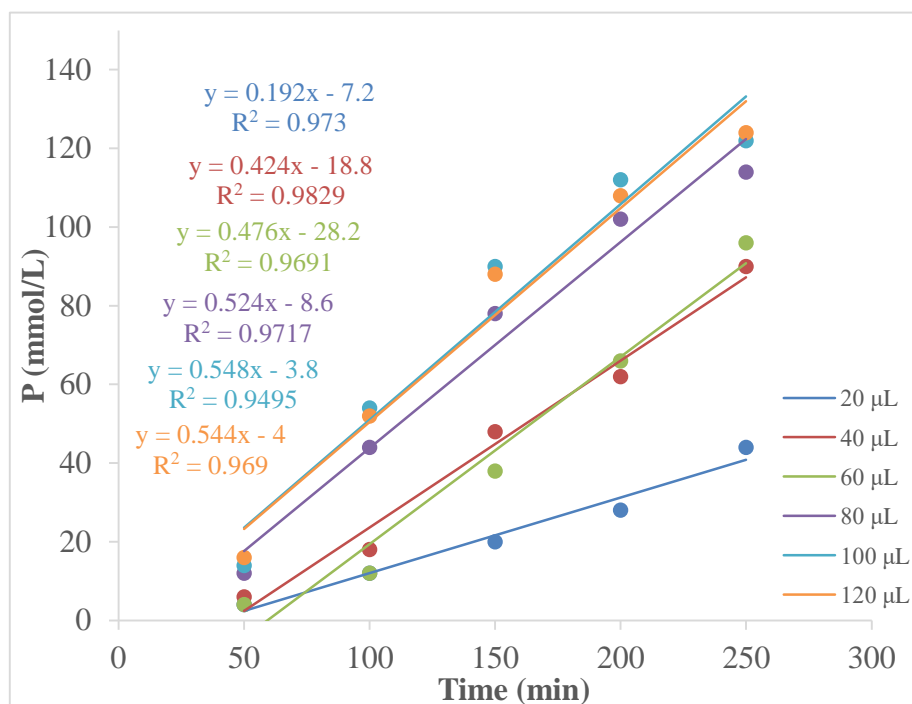

Fig. S8 Reaction profiles for H<sub>2</sub>O

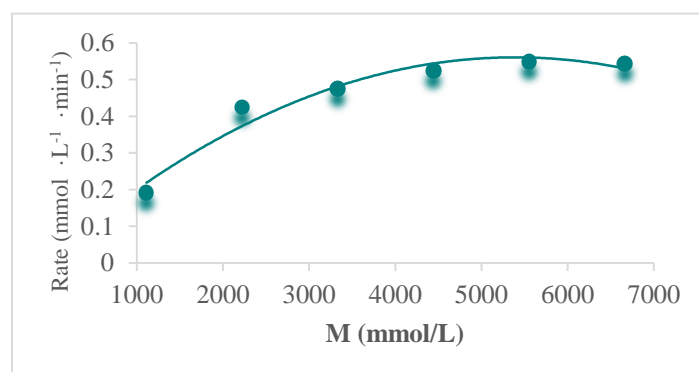

Fig. S9 Initial reaction rate dependence on concentration of H<sub>2</sub>O

#### 8.6.4 Dependence of the reaction rate on concentration of Pd<sub>2</sub>(dba)<sub>3</sub>

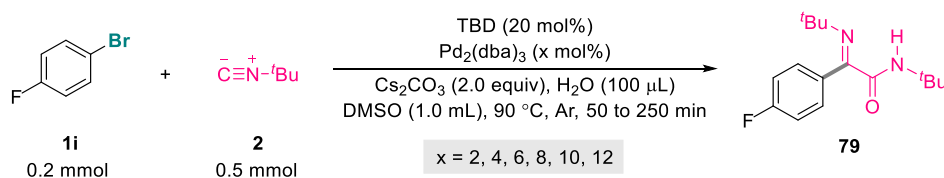

General procedure: **1i** (22.0 μL, 0.2 mmol), TBD (5.6 mg, 20 mol%), Pd<sub>2</sub>(dba)<sub>3</sub> (x mol%), Cs<sub>2</sub>CO<sub>3</sub> (130.3 mg, 0.4 mmol), H<sub>2</sub>O (100 μL) and extra dry DMSO (1.0 mL). The vial was evacuated and backfilled with argon for three times and then *tert*-butyl isocyanide **2** (56.6 μL, 0.5 mmol) was added by syringe under argon. The vial was then sealed and

was stirred at 90 °C (oil bath) for 12 h. One of the reaction vials was cooled to room temperature every 50 minutes. The reaction mixture was added with benzotrifluoride (internal standard, 24.6  $\mu\text{L}$ , 0.2 mmol), stirred for additional 1 min at room temperature, and filtered through a filter membrane. The yield of **79** was determined by  $^{19}\text{F}$ -NMR using benzotrifluoride as an internal standard.<sup>27,28</sup>

Kinetic profiles of different initial concentrations of  $\text{Pd}_2(\text{dba})_3$  were collected (Fig. S10). The rate was plotted against the concentration of  $\text{Pd}_2(\text{dba})_3$  (Fig. S11).

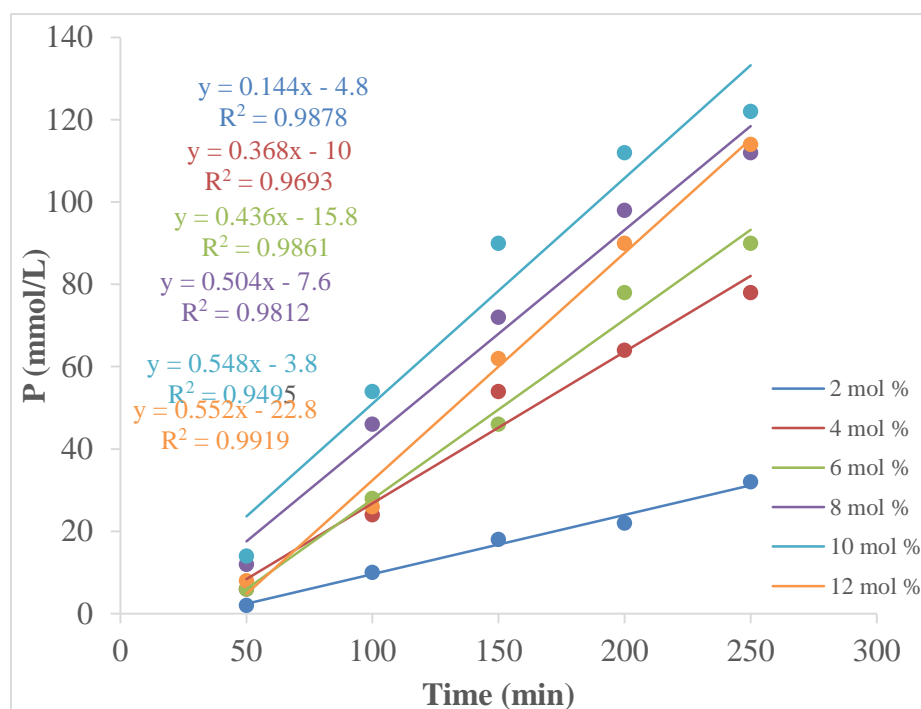

**Fig. S10** Reaction profiles for  $\text{Pd}_2(\text{dba})_3$

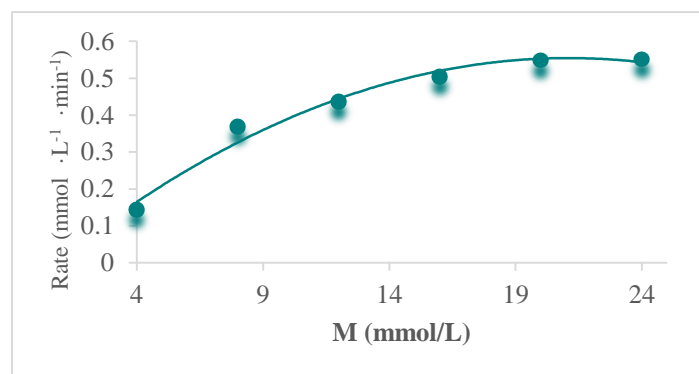

**Fig. S11** Initial reaction rate dependence on concentration of  $\text{Pd}_2(\text{dba})_3$



### 8.6.5 Dependence of the reaction rate on concentration of **TBD**

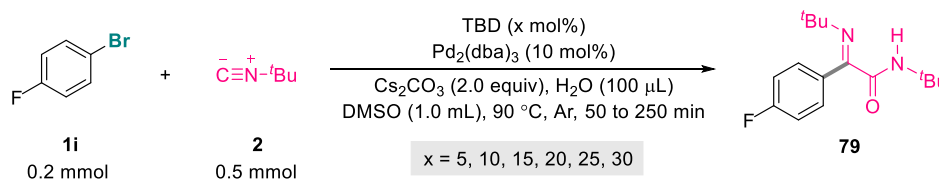

General procedure: **1i** (22.0 µL, 0.2 mmol), **TBD** (*x* mol%), Pd<sub>2</sub>(dba)<sub>3</sub> (18.3 mg, 10 mol%), Cs<sub>2</sub>CO<sub>3</sub> (130.3 mg, 0.4 mmol), H<sub>2</sub>O (100 µL) and extra dry DMSO (1.0 mL). The vial was evacuated and backfilled with argon for three times and then *tert*-butyl isocyanide **2** (56.6 µL, 0.5 mmol) was added by syringe under argon. The vial was then sealed and was stirred at 90 °C (oil bath) for 12 h. One of the reaction vials was cooled to room temperature every 50 minutes. The reaction mixture was added with benzotrifluoride (internal standard, 24.6 µL, 0.2 mmol), stirred for additional 1 min at room temperature, and filtered through a filter membrane. The yield of **79** was determined by <sup>19</sup>F-NMR using benzotrifluoride as an internal standard.<sup>27,28</sup>

Kinetic profiles of different initial concentrations of **TBD** were collected (Fig. S12). The rate was plotted against the concentration of **TBD** (Fig. S13).

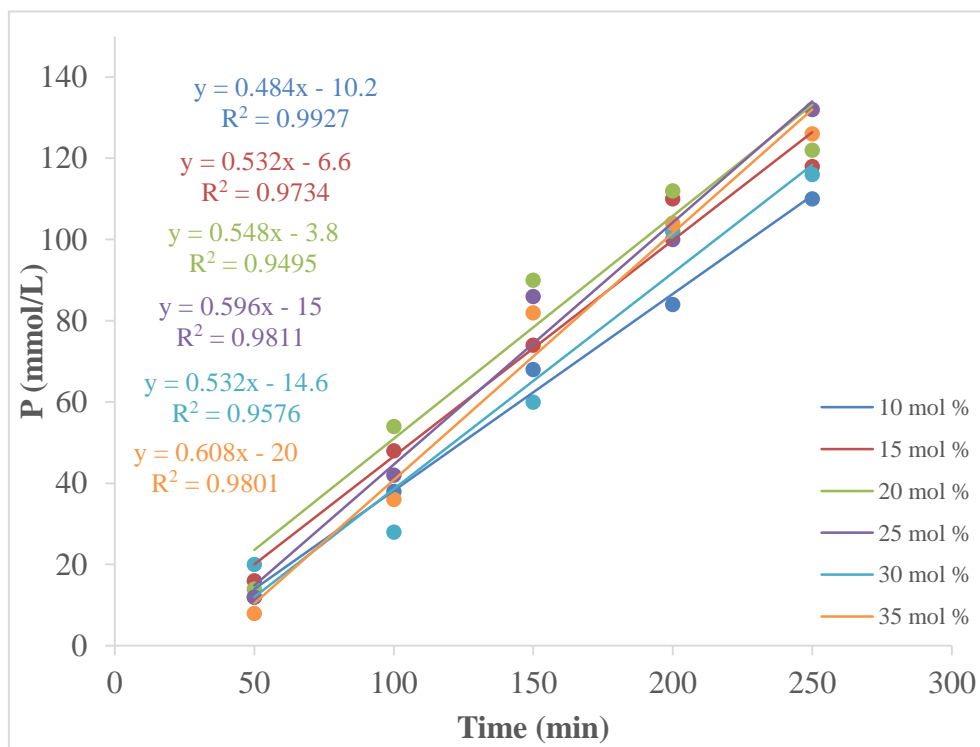

**Fig. S12** Reaction profiles for **TBD**

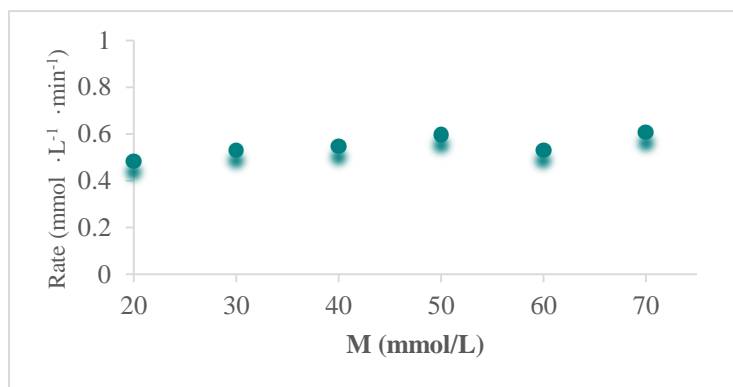

**Fig. S13** Initial reaction rate dependence on concentration of **TBD**

## 9. Single crystal X-ray diffraction

### 9.1 Cultivation of single crystals

Compounds **6**, **79** and **81** were dissolved in a mixture of ethyl acetate and petroleum ether solution, respectively, then put it in the ambient temperature. Suitable crystals of compounds **6**, **79** and **81** were obtained by slowly evaporating a mixture of ethyl acetate and petroleum ether solution at ambient temperature.

### 9.2 Crystal measurement

Compounds **6**, **79** and **81**, were collected at 100 K on a Rigaku Oxford Diffraction Supernova Dual Source, Cu at Zero equipped with an AtlasS2 CCD using Cu K $\alpha$  radiation. The data were collected and processed using CrysAlisPro. The structures were solved by direct methods using Olex2 software, and the non-hydrogen atoms were located from the trial structure and then refined anisotropically with SHELXL-2018 using a full-matrix least squares procedure based on  $F^2$ . The weighted  $R$  factor,  $wR$  and goodness-of-fit  $S$  values were obtained based on  $F^2$ . The hydrogen atom positions were fixed geometrically at the calcd. distances and allowed to ride on their parent atoms.

CCDC-2338684 (**6**), CCDC-2338685 (**79**), CCDC-2338686 (**81**) contain the supplementary crystallographic data for this paper. These data can be obtained free of charge from The Cambridge Crystallographic Data Centre via [www.ccdc.cam.ac.uk/data\\_request/cif](http://www.ccdc.cam.ac.uk/data_request/cif).

### 9.3 X-ray crystallographic data of **6**, **79** and **81**

The ellipsoids are shown at 30% probability levels.

**Table S8. X-ray crystallographic data of **6****

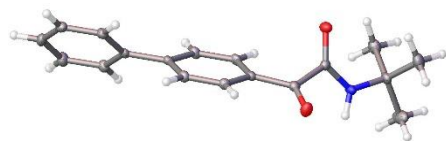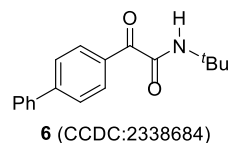

| Identification code                         | <b>6</b>                                                      |
|---------------------------------------------|---------------------------------------------------------------|
| Empirical formula                           | C <sub>18</sub> H <sub>19</sub> NO <sub>2</sub>               |
| Formula weight                              | 281.34                                                        |
| Temperature/K                               | 170.00(10)                                                    |
| Crystal system                              | monoclinic                                                    |
| Space group                                 | P2 <sub>1</sub> /n                                            |
| a/Å                                         | 5.9331(9)                                                     |
| b/Å                                         | 26.240(3)                                                     |
| c/Å                                         | 9.8813(11)                                                    |
| α/°                                         | 90                                                            |
| β/°                                         | 104.418(13)                                                   |
| γ/°                                         | 90                                                            |
| Volume/Å <sup>3</sup>                       | 1489.9(3)                                                     |
| Z                                           | 4                                                             |
| ρ <sub>calc</sub> /g/cm <sup>3</sup>        | 1.254                                                         |
| μ/mm <sup>-1</sup>                          | 0.081                                                         |
| F(000)                                      | 600.0                                                         |
| Crystal size/mm <sup>3</sup>                | 0.15 × 0.13 × 0.12                                            |
| Radiation                                   | Mo Kα (λ = 0.71073)                                           |
| 2θ range for data collection/°              | 4.53 to 49.996                                                |
| Index ranges                                | -5 ≤ h ≤ 7, -29 ≤ k ≤ 31, -11 ≤ l ≤ 11                        |
| Reflections collected                       | 6245                                                          |
| Independent reflections                     | 2612 [R <sub>int</sub> = 0.0318, R <sub>sigma</sub> = 0.0455] |
| Data/restraints/parameters                  | 2612/0/193                                                    |
| Goodness-of-fit on F <sup>2</sup>           | 1.079                                                         |
| Final R indexes [I ≥ 2σ (I)]                | R <sub>1</sub> = 0.0473, wR <sub>2</sub> = 0.0996             |
| Final R indexes [all data]                  | R <sub>1</sub> = 0.0631, wR <sub>2</sub> = 0.1089             |
| Largest diff. peak/hole / e Å <sup>-3</sup> | 0.17/-0.20                                                    |

**Table S9. X-ray crystallographic data of 79**

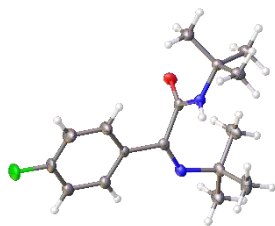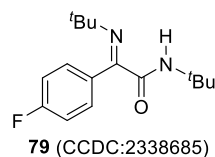

| Identification code                         | 79                                                            |
|---------------------------------------------|---------------------------------------------------------------|
| Empirical formula                           | C <sub>16</sub> H <sub>23</sub> FN <sub>2</sub> O             |
| Formula weight                              | 278.36                                                        |
| Temperature/K                               | 149.94(12)                                                    |
| Crystal system                              | triclinic                                                     |
| Space group                                 | P-1                                                           |
| a/Å                                         | 9.3415(10)                                                    |
| b/Å                                         | 10.0623(13)                                                   |
| c/Å                                         | 19.6690(17)                                                   |
| α/°                                         | 81.197(9)                                                     |
| β/°                                         | 78.568(8)                                                     |
| γ/°                                         | 63.180(12)                                                    |
| Volume/Å <sup>3</sup>                       | 1612.9(3)                                                     |
| Z                                           | 4                                                             |
| ρ <sub>calc</sub> /g/cm <sup>3</sup>        | 1.146                                                         |
| μ/mm <sup>-1</sup>                          | 0.080                                                         |
| F(000)                                      | 600.0                                                         |
| Crystal size/mm <sup>3</sup>                | 0.15 × 0.12 × 0.1                                             |
| Radiation                                   | Mo Kα (λ = 0.71073)                                           |
| 2θ range for data collection/°              | 4.236 to 49.998                                               |
| Index ranges                                | -11 ≤ h ≤ 11, -11 ≤ k ≤ 11, -20 ≤ l ≤ 23                      |
| Reflections collected                       | 10972                                                         |
| Independent reflections                     | 5670 [R <sub>int</sub> = 0.0384, R <sub>sigma</sub> = 0.0617] |
| Data/restraints/parameters                  | 5670/0/377                                                    |
| Goodness-of-fit on F <sup>2</sup>           | 1.056                                                         |
| Final R indexes [I ≥ 2σ (I)]                | R <sub>1</sub> = 0.0871, wR <sub>2</sub> = 0.2139             |
| Final R indexes [all data]                  | R <sub>1</sub> = 0.1141, wR <sub>2</sub> = 0.2326             |
| Largest diff. peak/hole / e Å <sup>-3</sup> | 0.41/-0.34                                                    |

**Table S10. X-ray crystallographic data of 81**

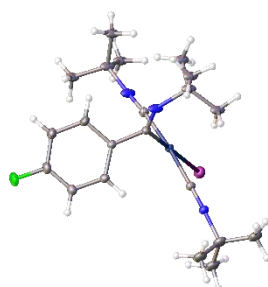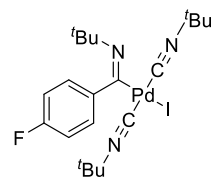

**81** (CCDC:2338686)

| Identification code                         | <b>81</b>                                                     |
|---------------------------------------------|---------------------------------------------------------------|
| Empirical formula                           | C <sub>16</sub> H <sub>23</sub> FN <sub>2</sub> O             |
| Formula weight                              | 278.36                                                        |
| Temperature/K                               | 149.94(12)                                                    |
| Crystal system                              | triclinic                                                     |
| Space group                                 | P-1                                                           |
| a/Å                                         | 9.3415(10)                                                    |
| b/Å                                         | 10.0623(13)                                                   |
| c/Å                                         | 19.6690(17)                                                   |
| α/°                                         | 81.197(9)                                                     |
| β/°                                         | 78.568(8)                                                     |
| γ/°                                         | 63.180(12)                                                    |
| Volume/Å <sup>3</sup>                       | 1612.9(3)                                                     |
| Z                                           | 4                                                             |
| ρ <sub>calc</sub> /cm <sup>3</sup>          | 1.146                                                         |
| μ/mm <sup>-1</sup>                          | 0.080                                                         |
| F(000)                                      | 600.0                                                         |
| Crystal size/mm <sup>3</sup>                | 0.15 × 0.12 × 0.1                                             |
| Radiation                                   | Mo Kα (λ = 0.71073)                                           |
| 2θ range for data collection/°              | 4.236 to 49.998                                               |
| Index ranges                                | -11 ≤ h ≤ 11, -11 ≤ k ≤ 11, -20 ≤ l ≤ 23                      |
| Reflections collected                       | 10972                                                         |
| Independent reflections                     | 5670 [R <sub>int</sub> = 0.0384, R <sub>sigma</sub> = 0.0617] |
| Data/restraints/parameters                  | 5670/0/377                                                    |
| Goodness-of-fit on F <sup>2</sup>           | 1.056                                                         |
| Final R indexes [I ≥ 2σ (I)]                | R <sub>1</sub> = 0.0871, wR <sub>2</sub> = 0.2139             |
| Final R indexes [all data]                  | R <sub>1</sub> = 0.1141, wR <sub>2</sub> = 0.2326             |
| Largest diff. peak/hole / e Å <sup>-3</sup> | 0.41/-0.34                                                    |

## 10. Copies of $^1\text{H}$ -NMR, $^{13}\text{C}$ -NMR and $^{19}\text{F}$ -NMR spectra

CJH-1-37-1-H

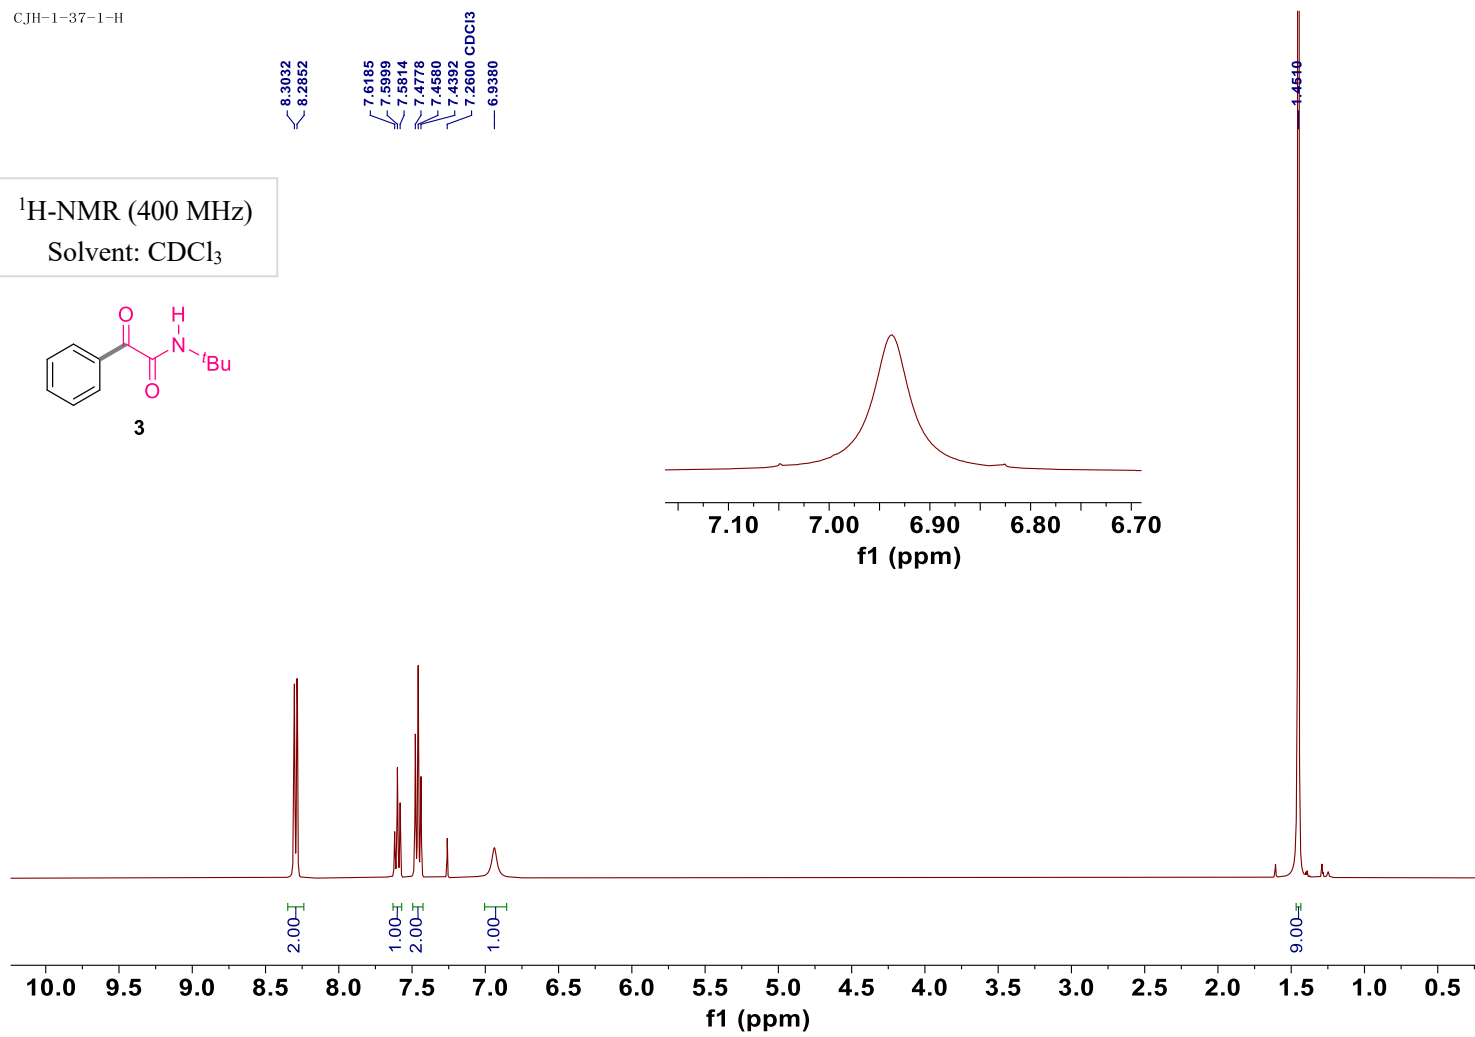

CJH-1-37-1-C

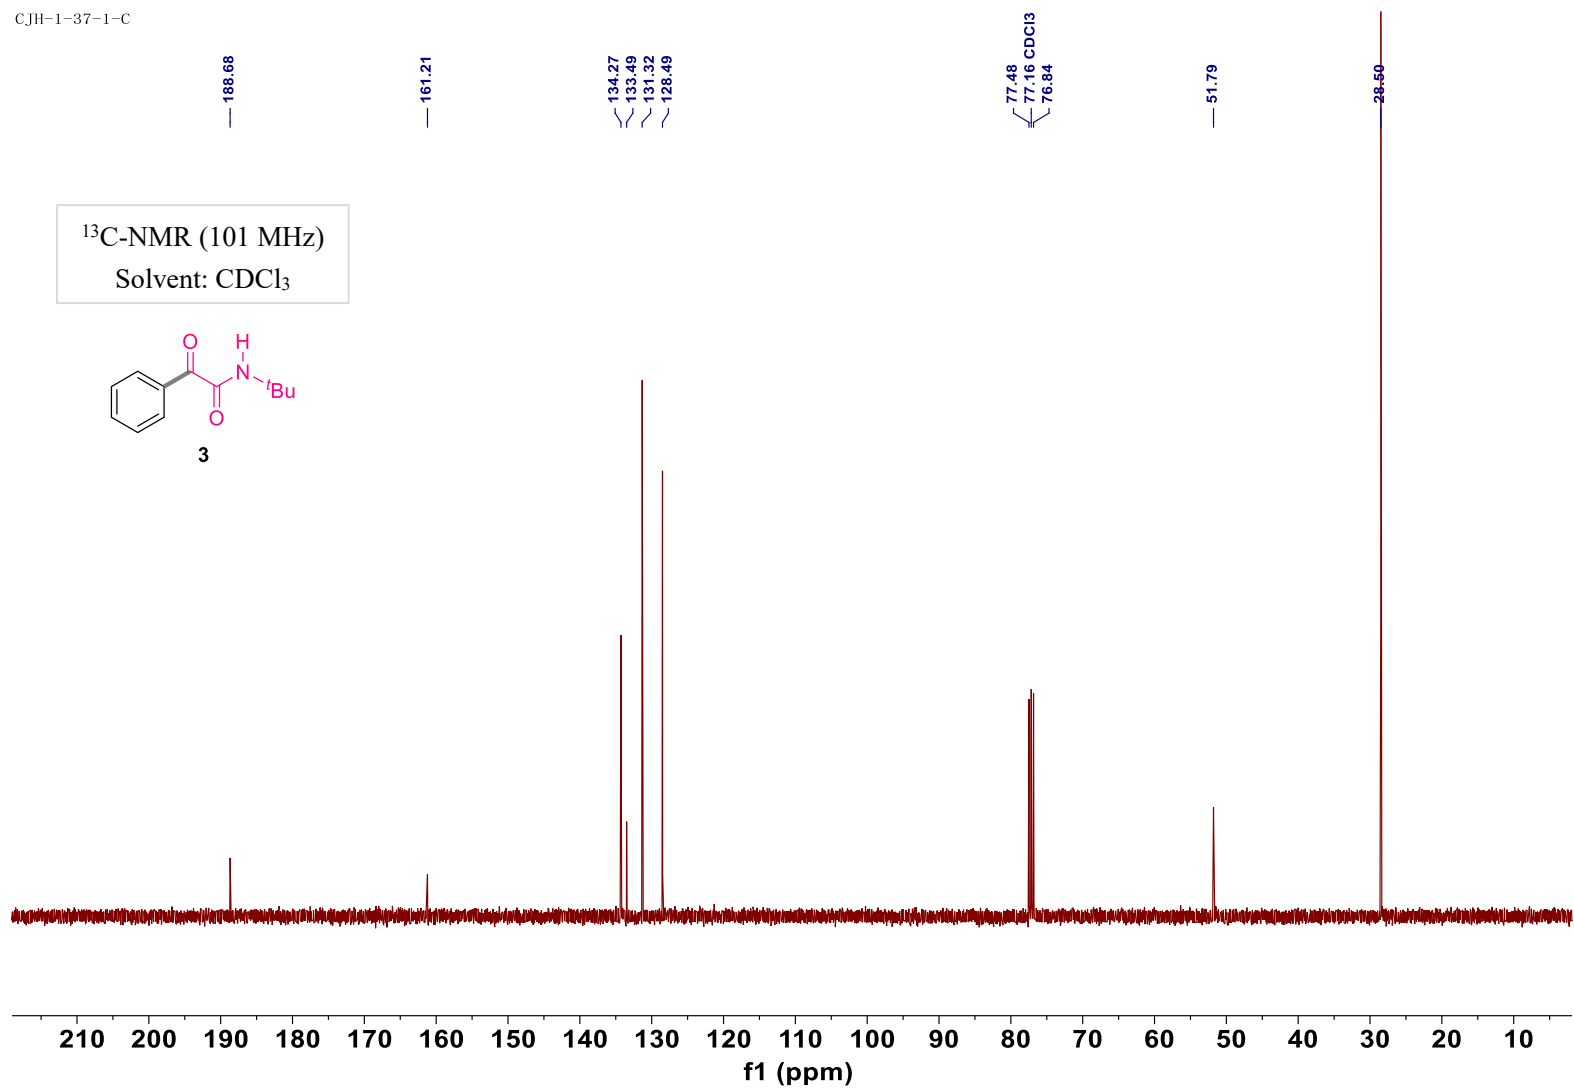

S81



CJH-1-38-1-H

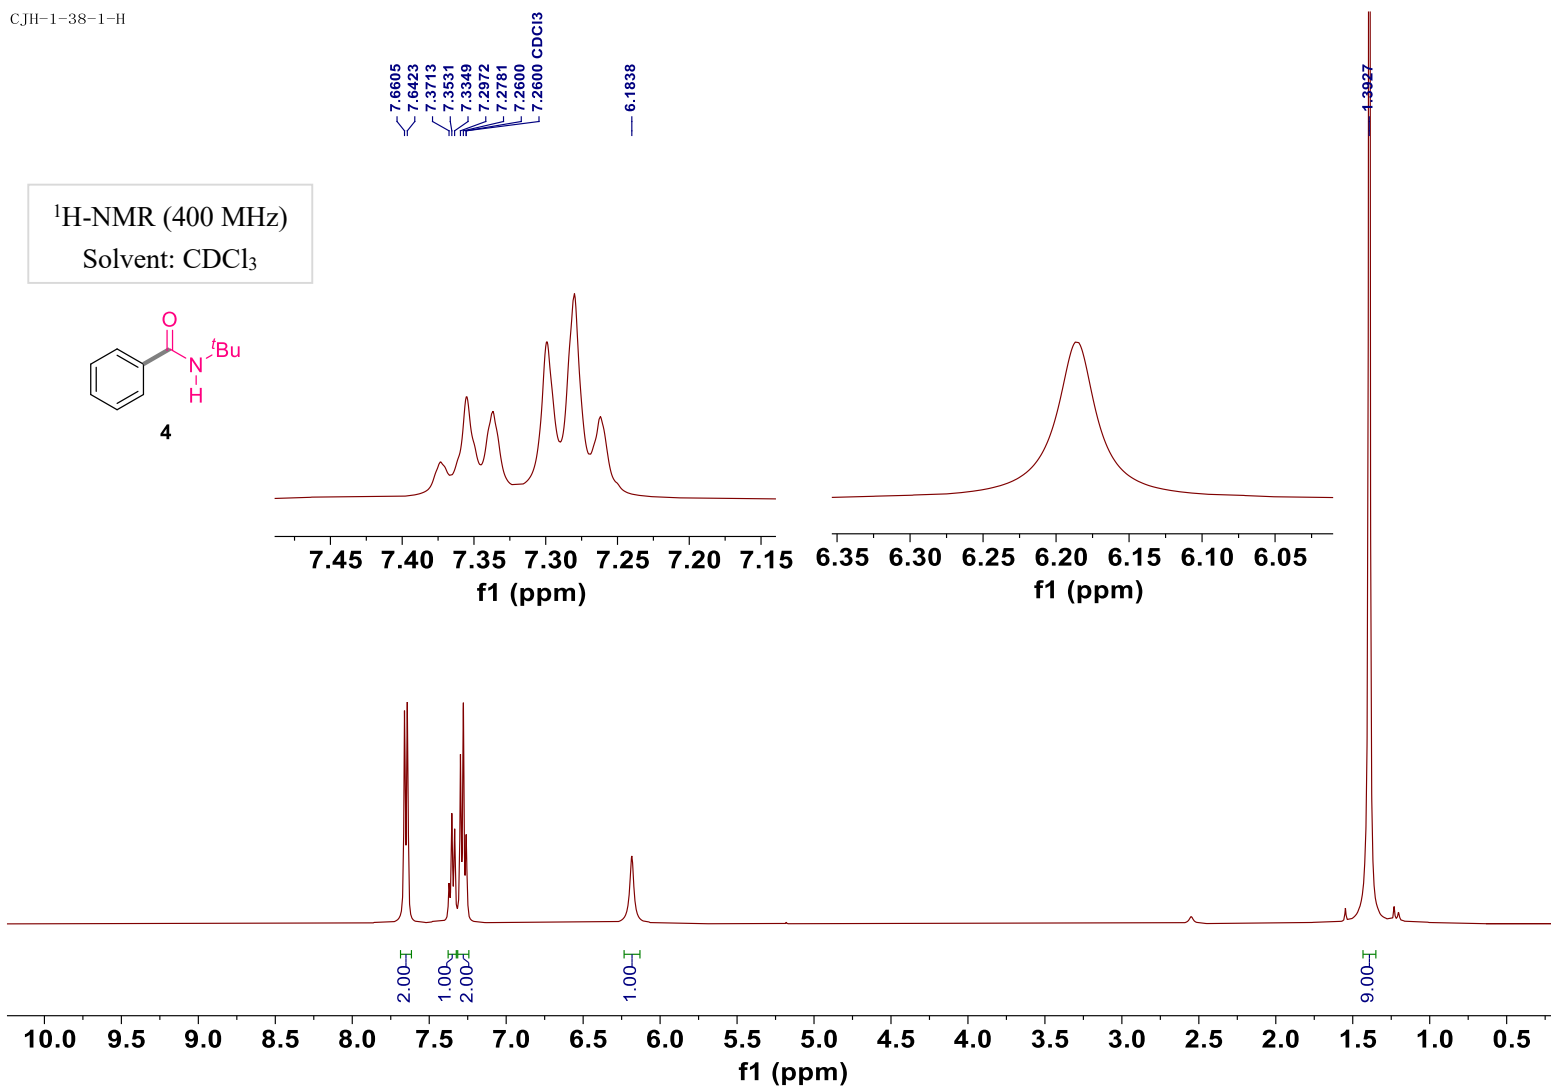

CJH-1-38-1-C

$^{13}\text{C}$ -NMR (101 MHz)  
Solvent:  $\text{CDCl}_3$

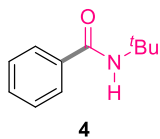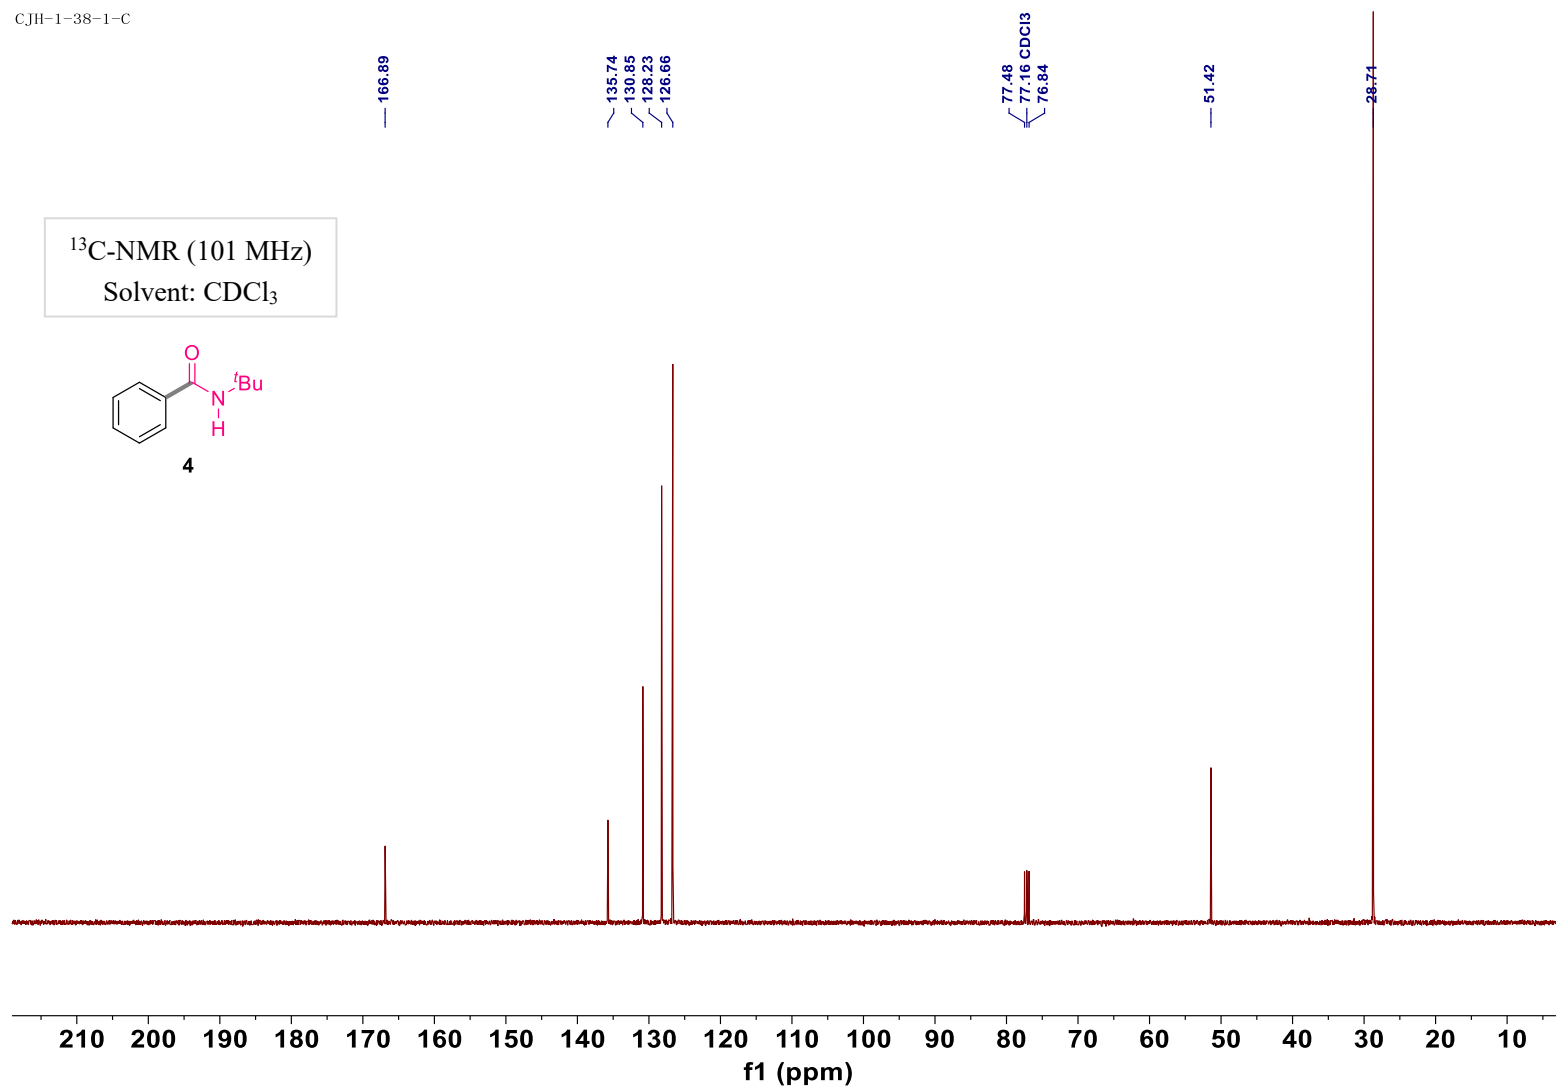

CJH-1-102-3-H

<sup>1</sup>H-NMR (400 MHz)  
Solvent: CDCl<sub>3</sub>

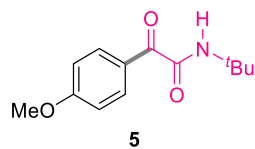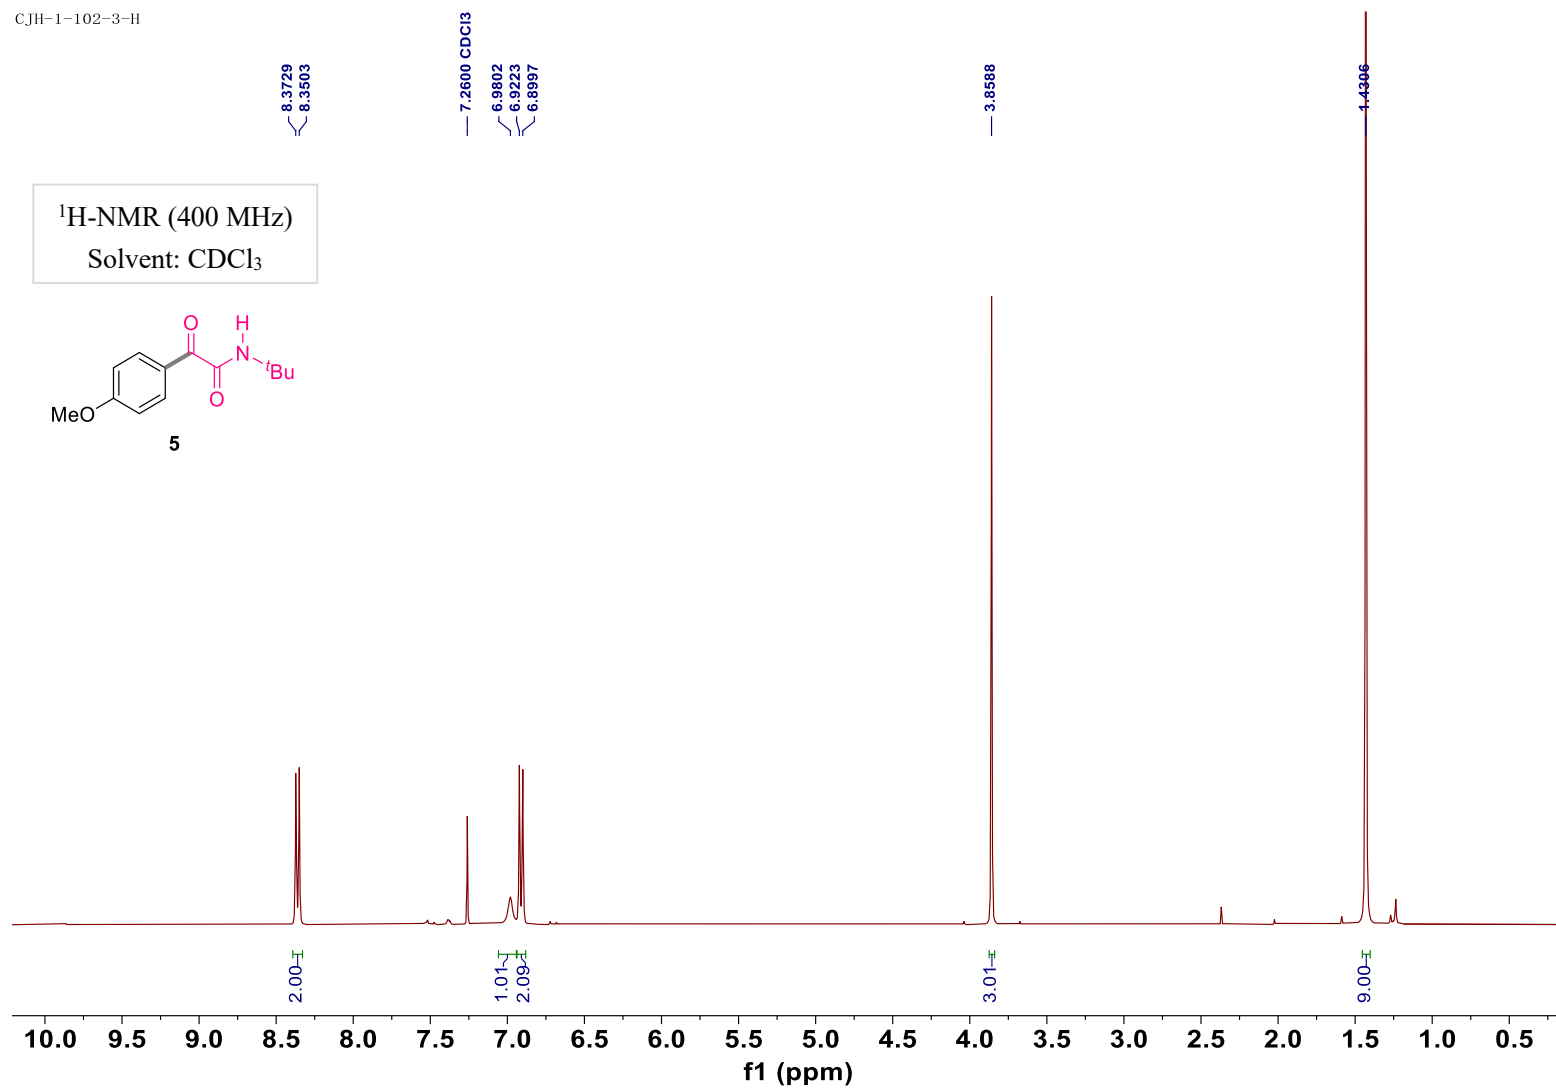

CJH-1-102-3-C

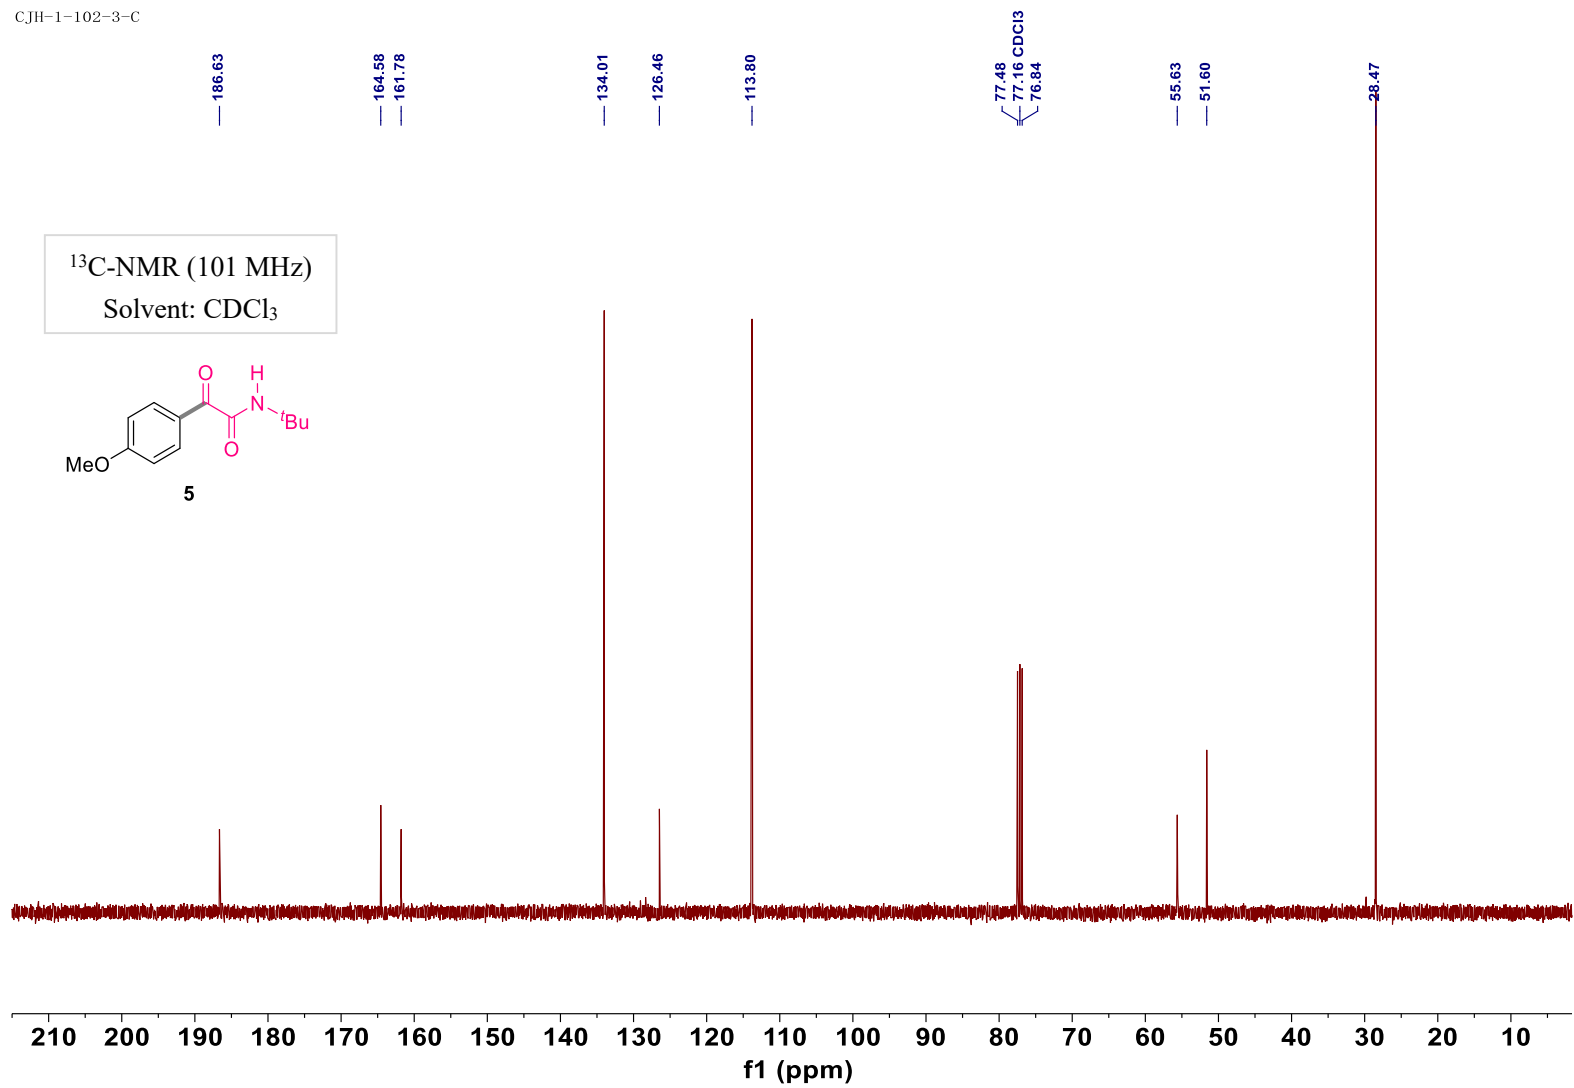

S85

CJH-1-103-1-H

<sup>1</sup>H-NMR (400 MHz)  
Solvent: CDCl<sub>3</sub>

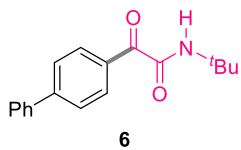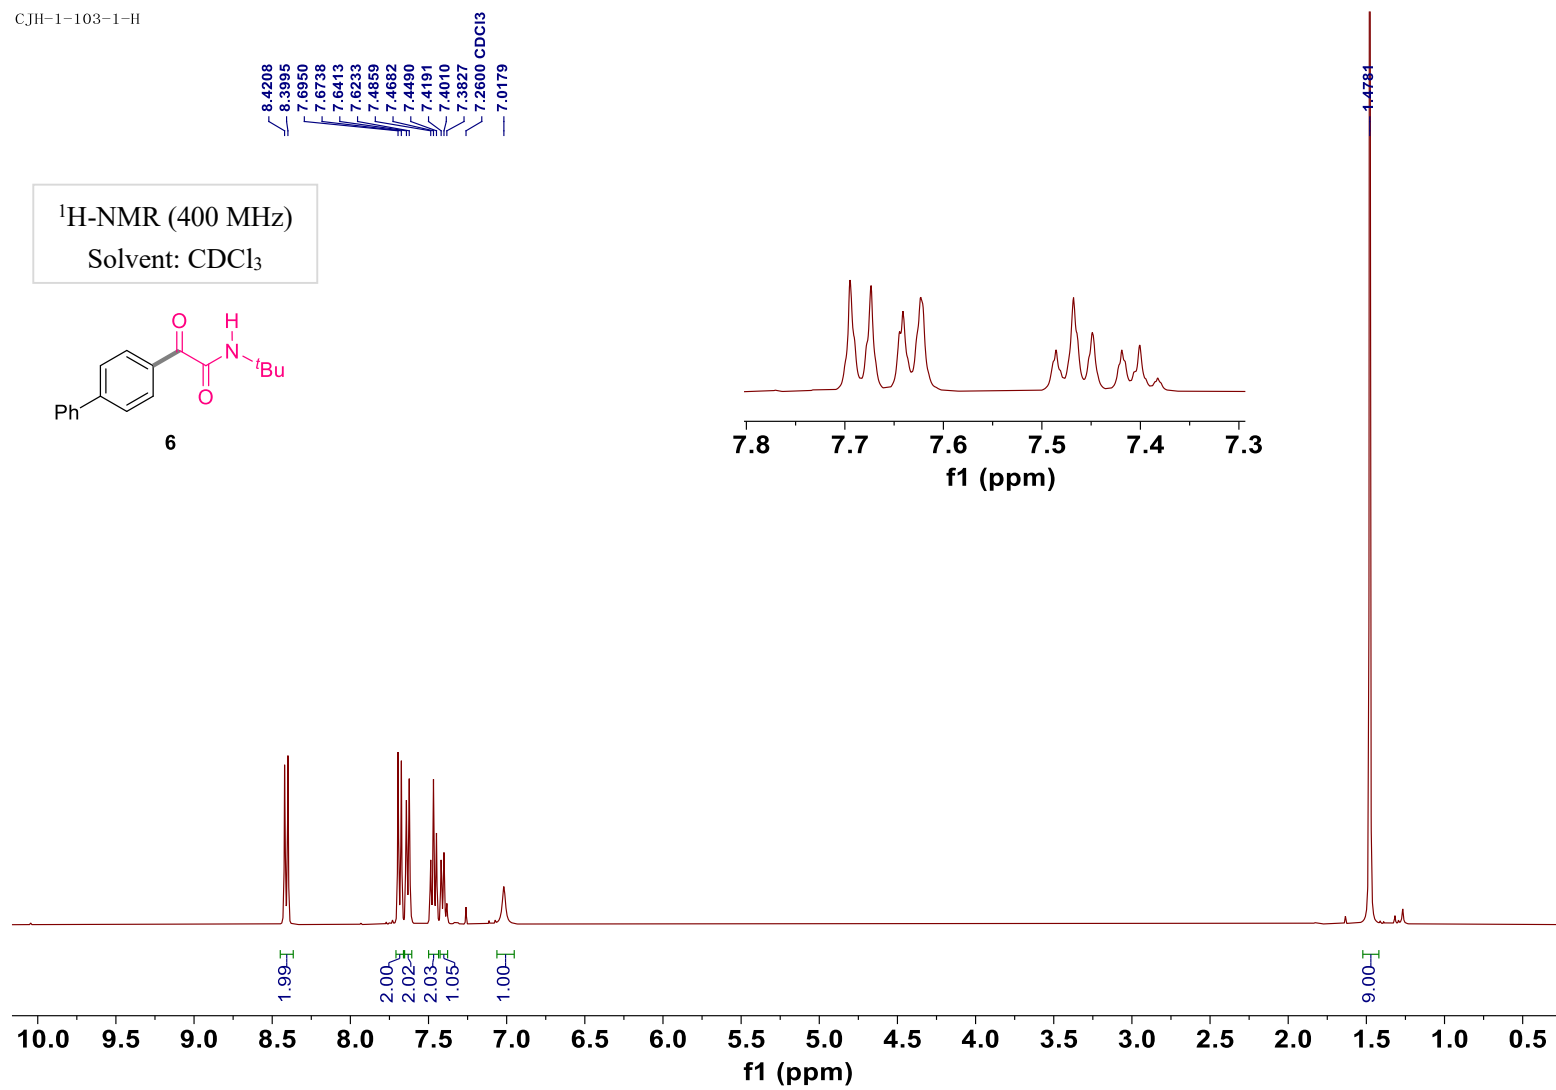

CJH-1-103-1-C

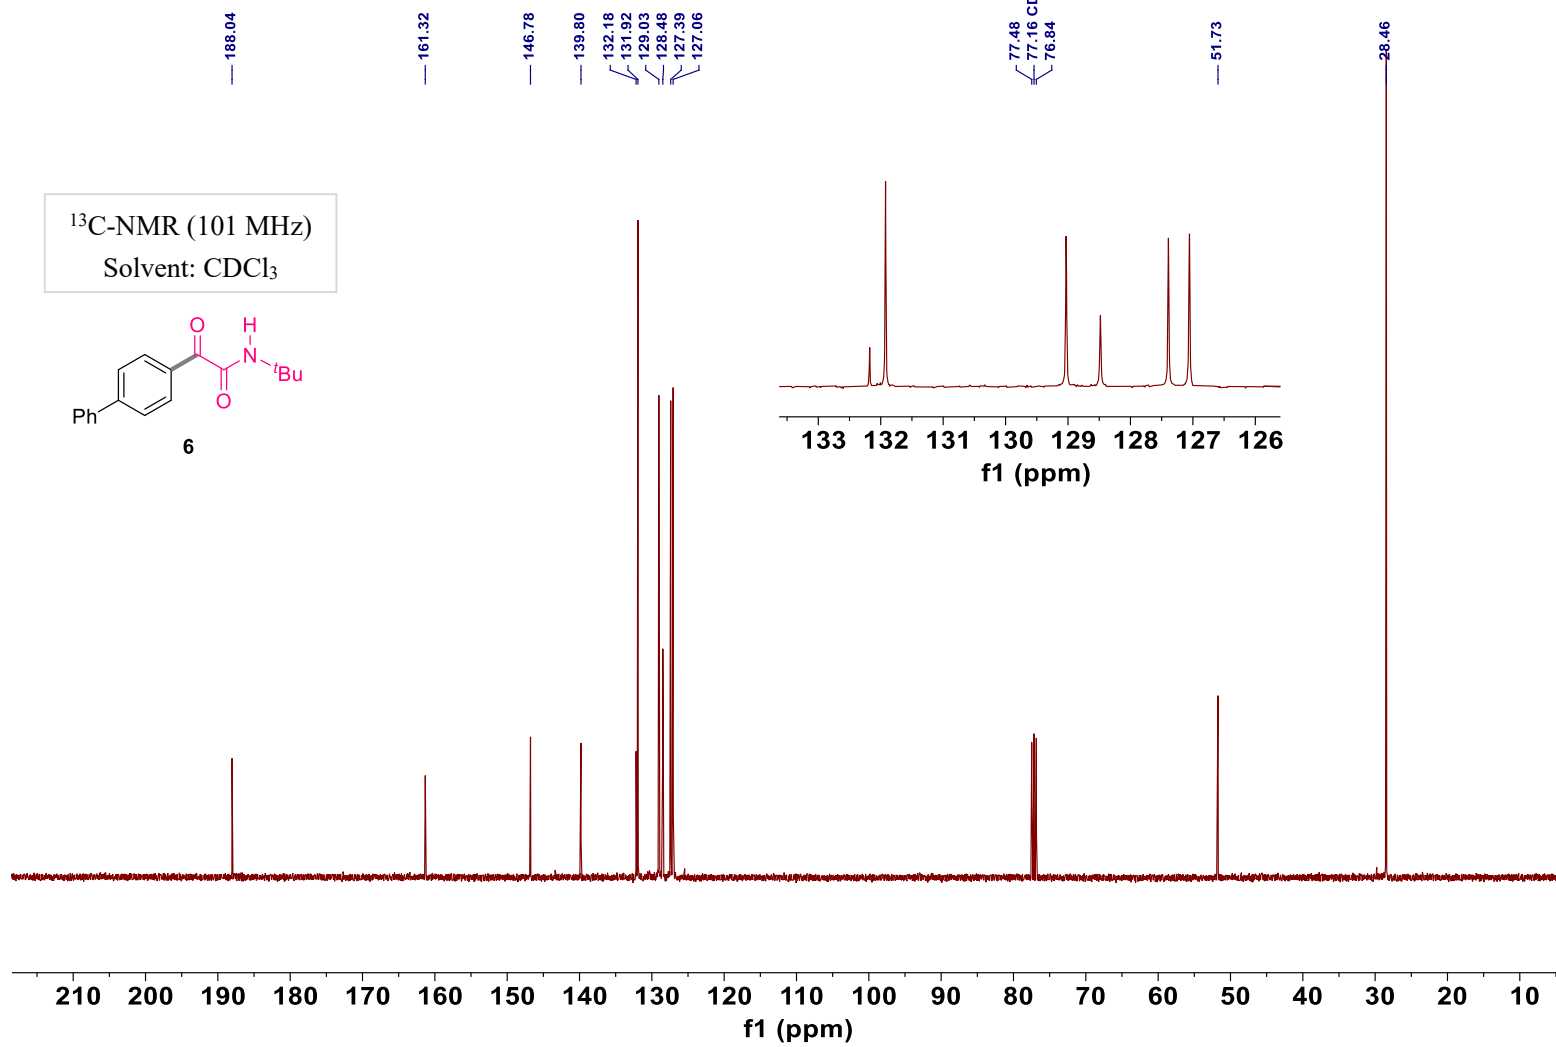

CJH-1-102-2-H

<sup>1</sup>H-NMR (400 MHz)  
Solvent: CDCl<sub>3</sub>

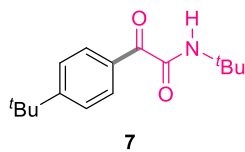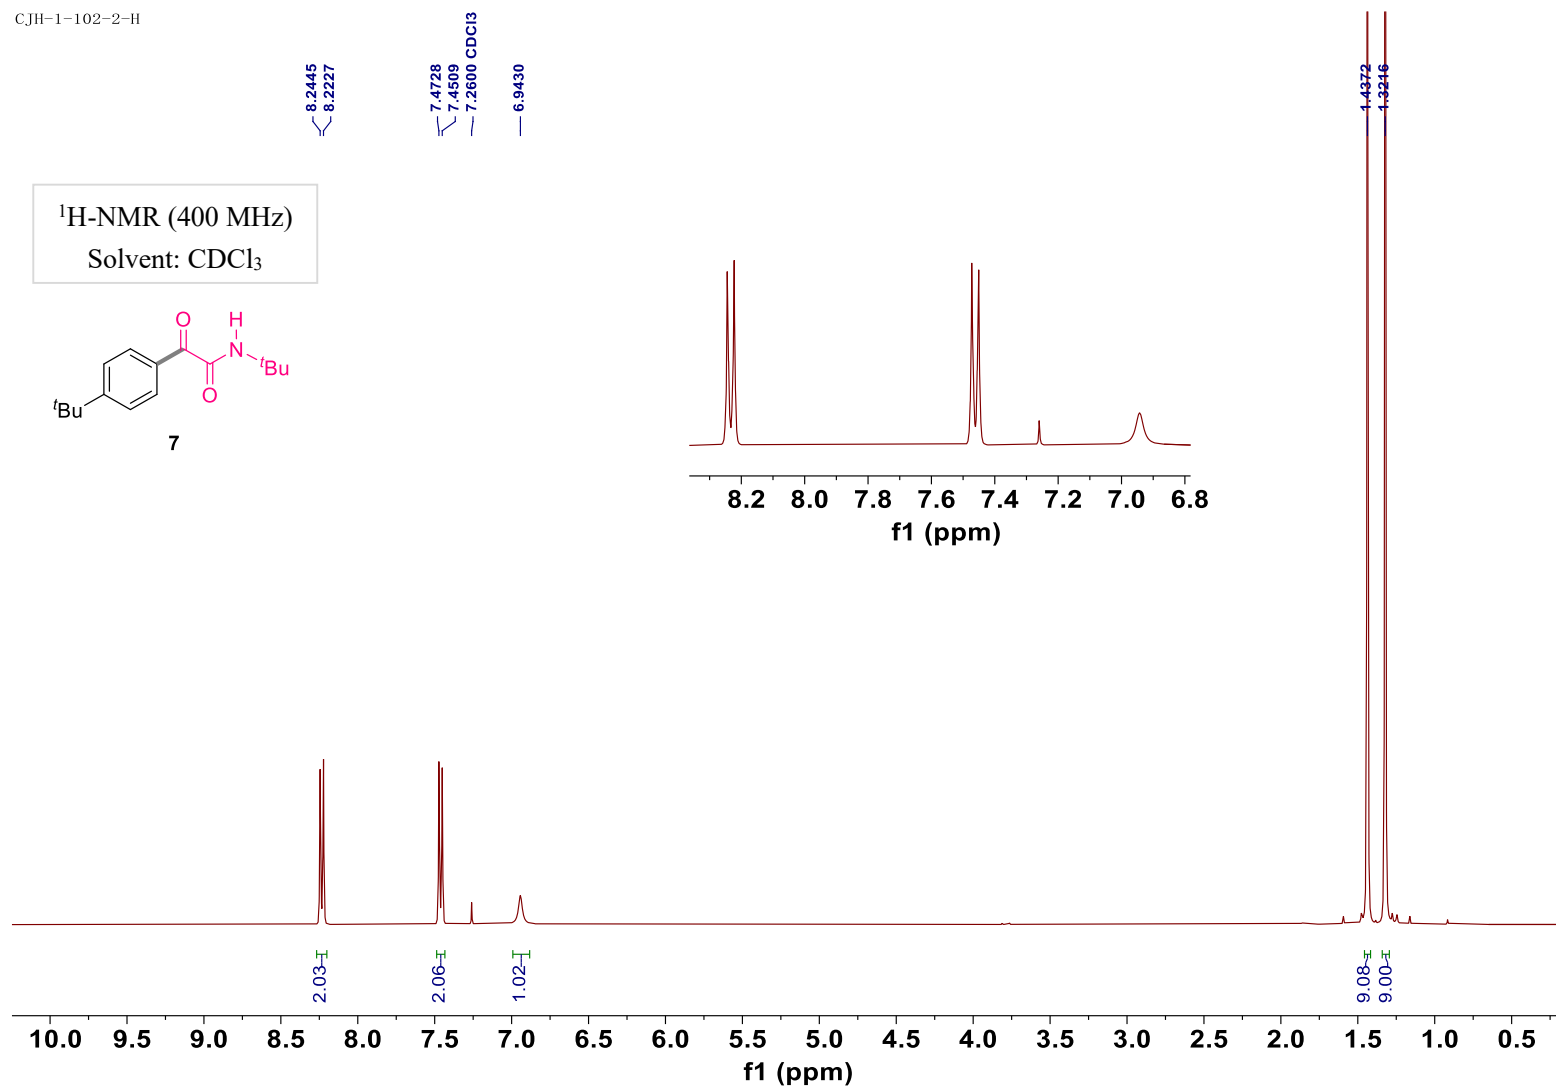

CJH-1-102-2-C

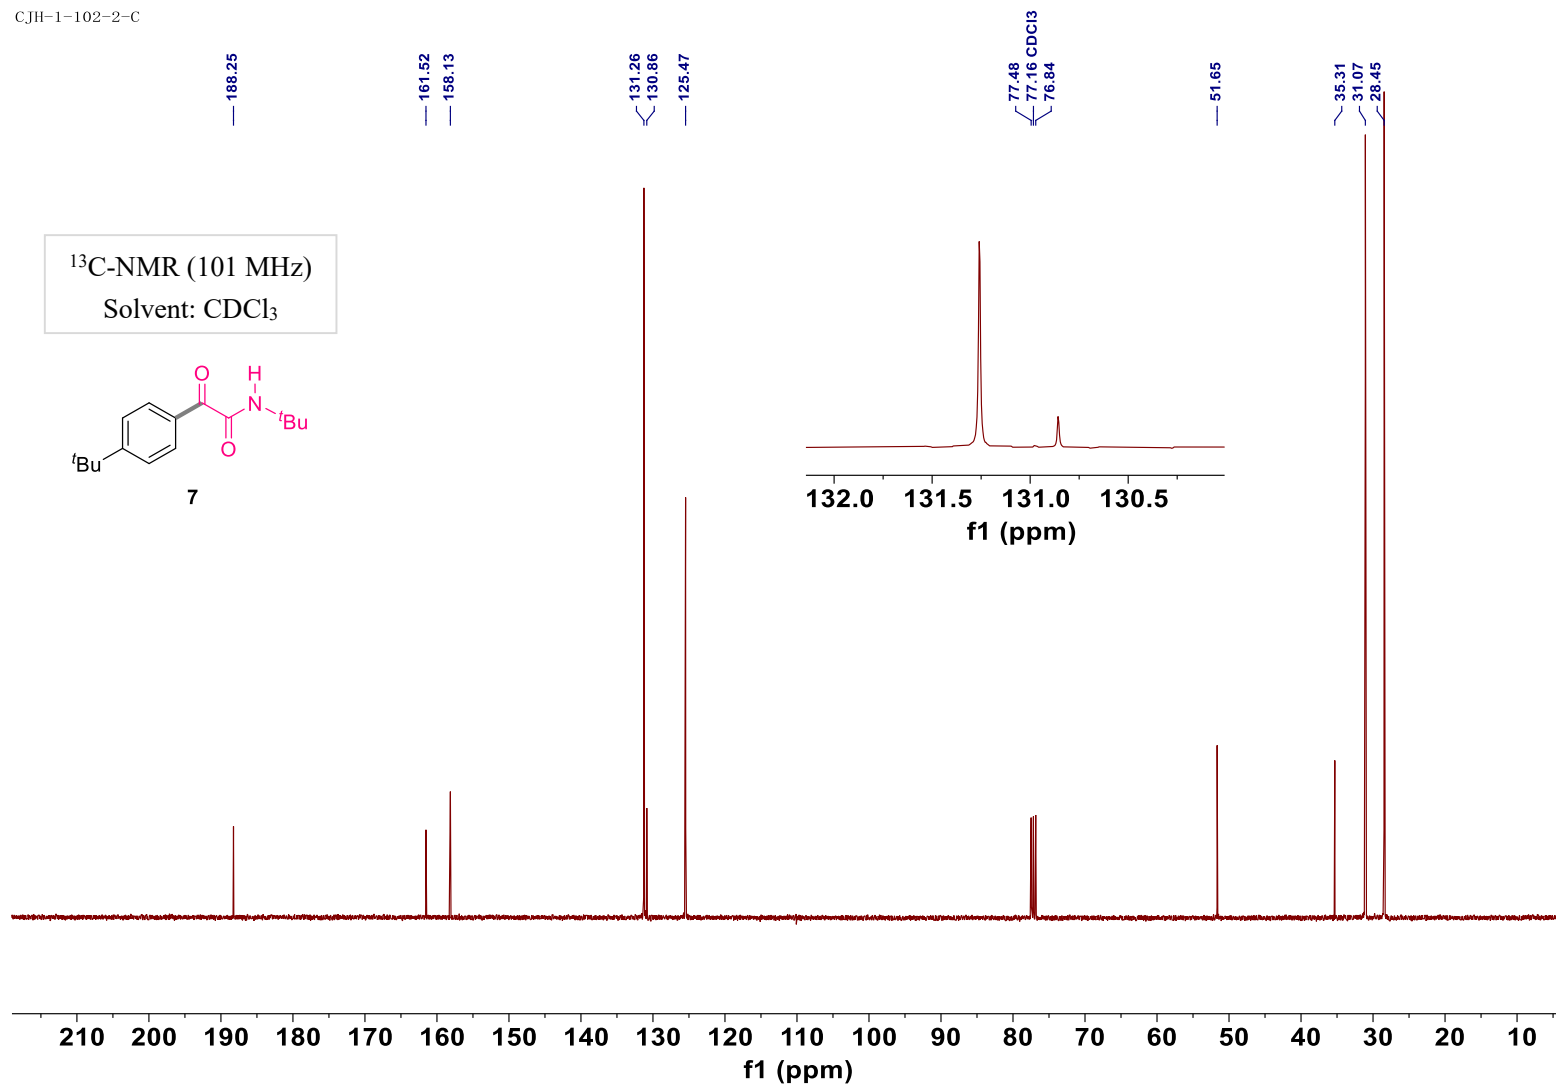



CJH-2-61-3-H

<sup>1</sup>H-NMR (400 MHz)  
Solvent: CDCl<sub>3</sub>

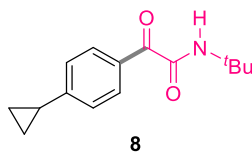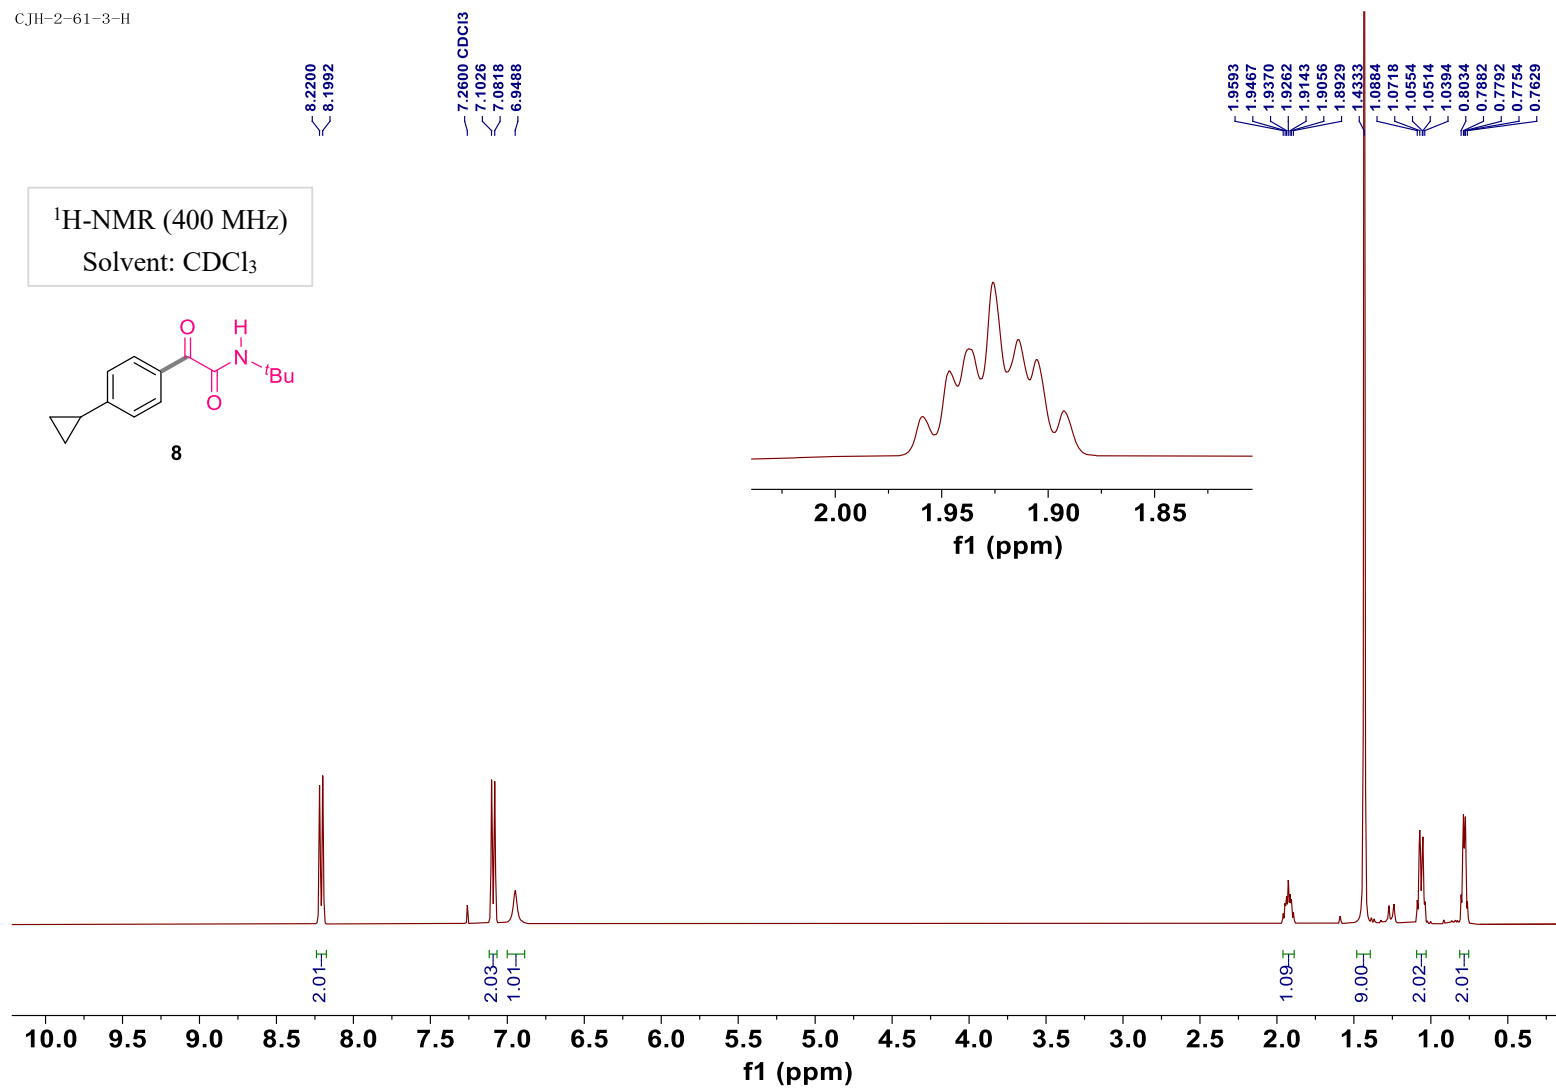

CJH-2-61-3-C

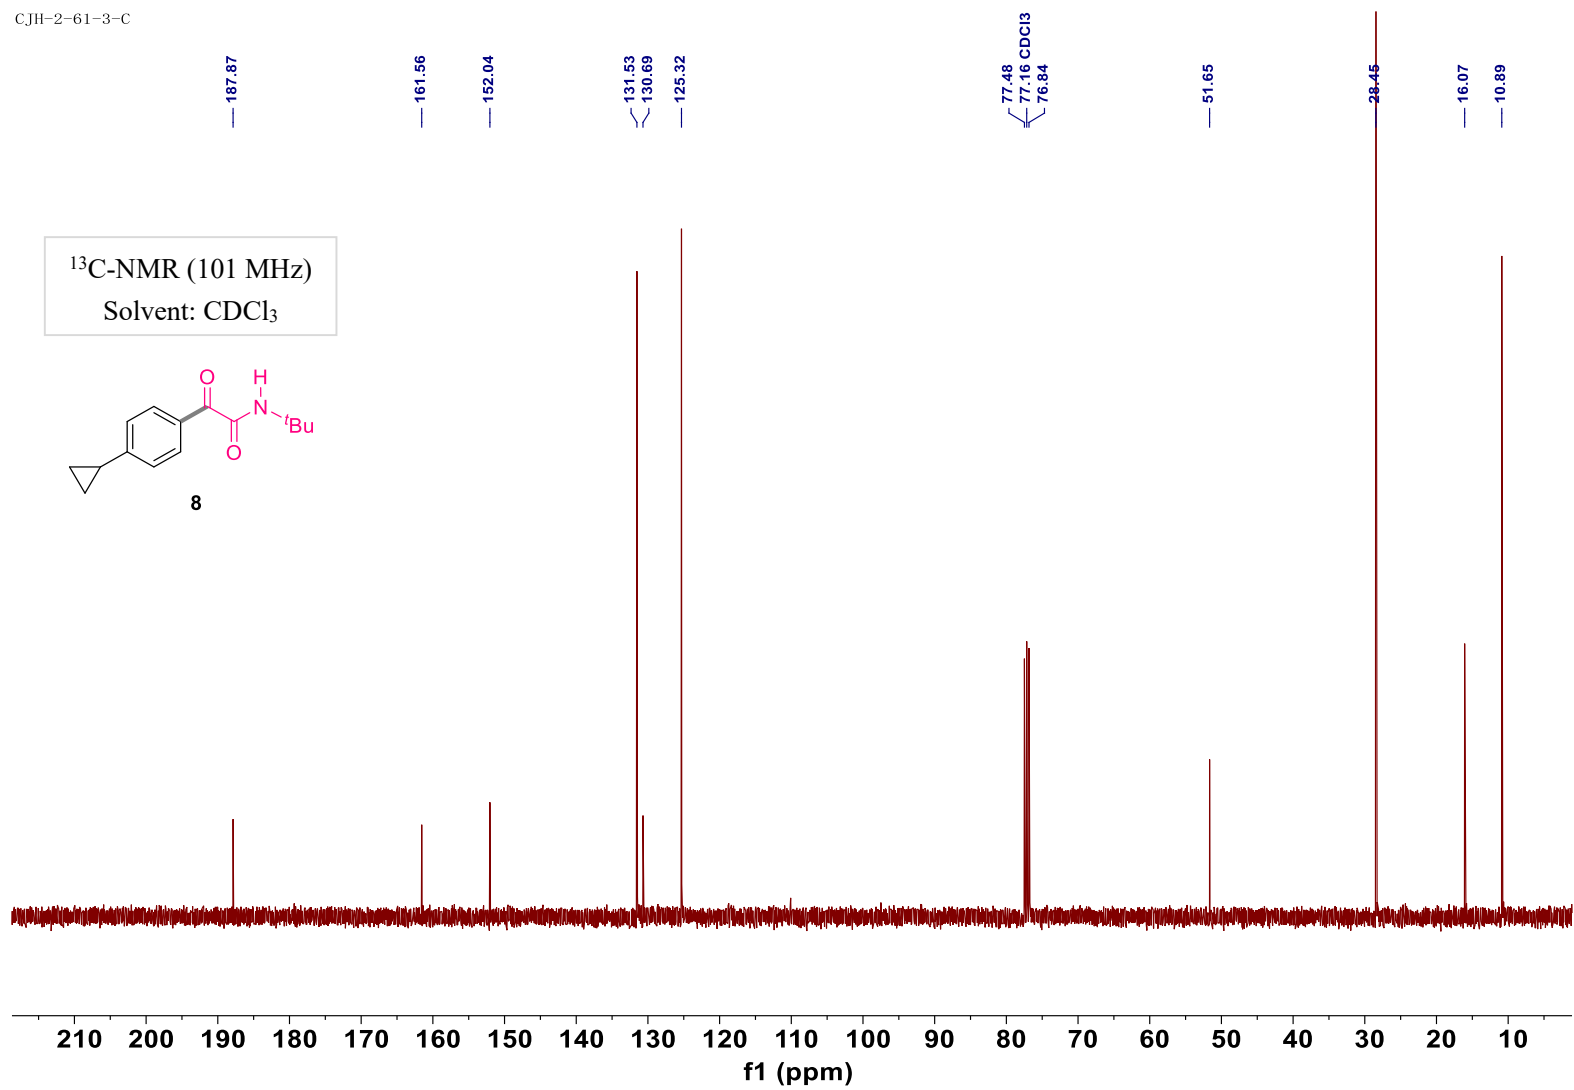

CJH-1-109-1-H

<sup>1</sup>H-NMR (400 MHz)  
Solvent: CDCl<sub>3</sub>

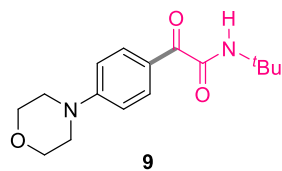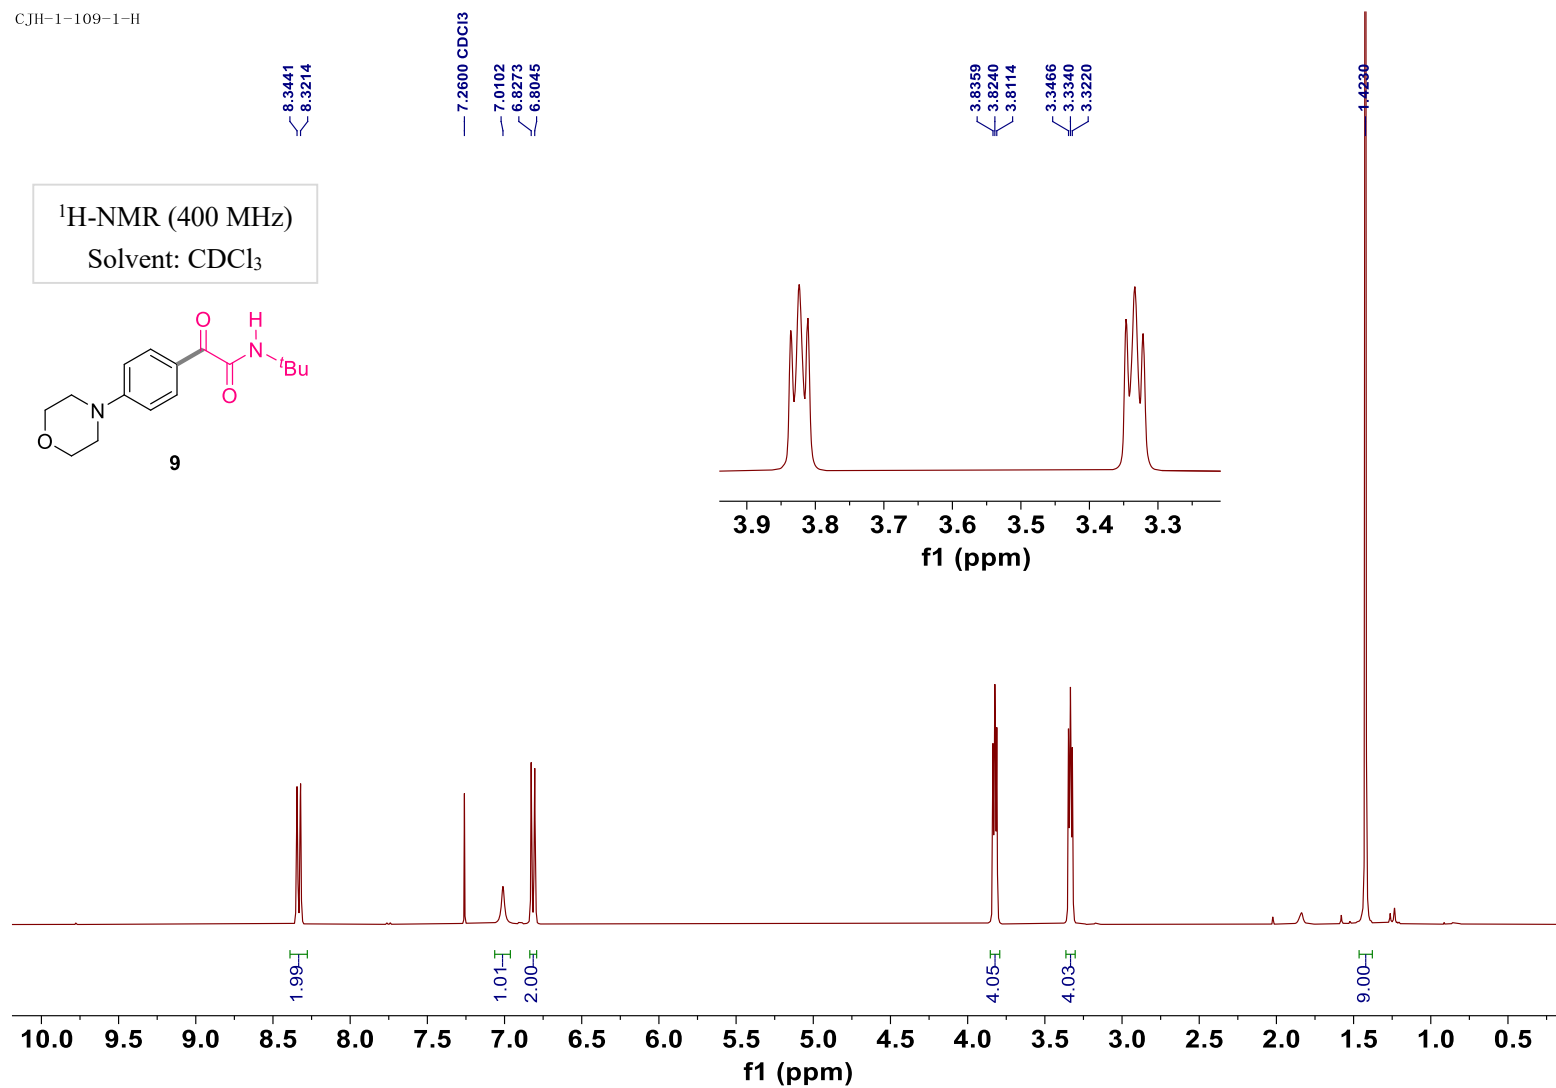

CJH-1-109-1-C

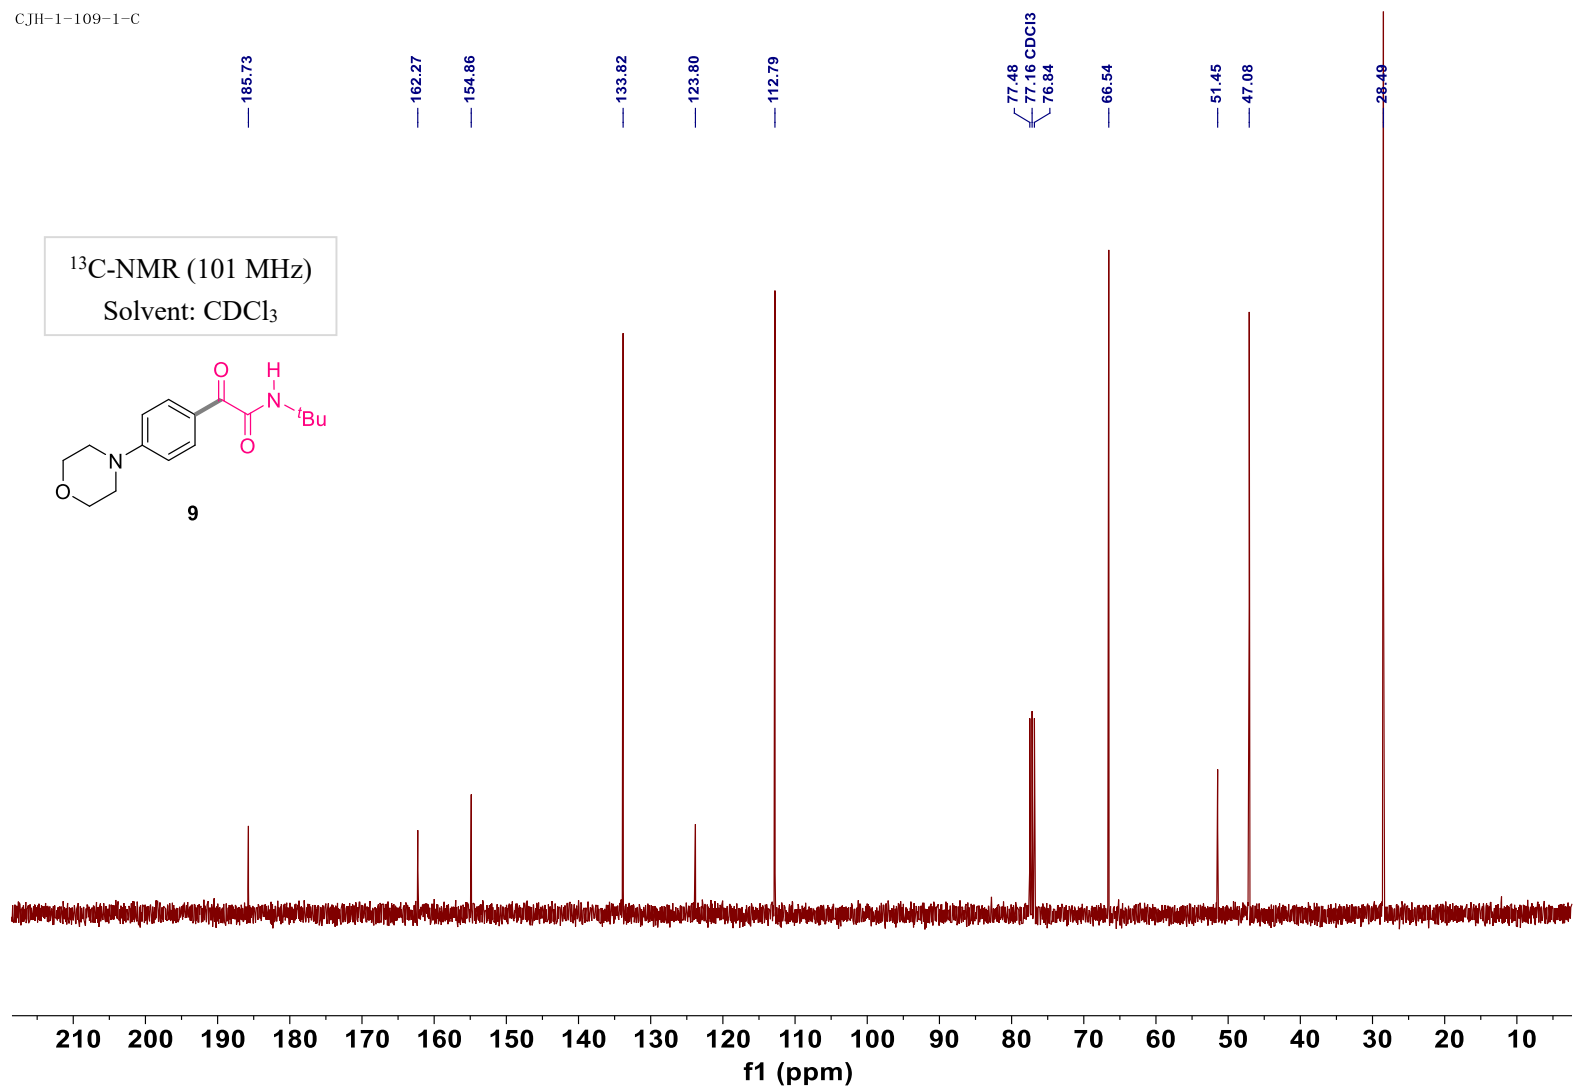

CJH-2-62-1-H

<sup>1</sup>H-NMR (400 MHz)  
Solvent: CDCl<sub>3</sub>

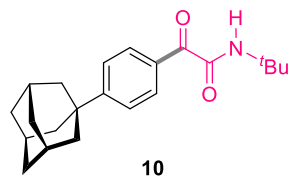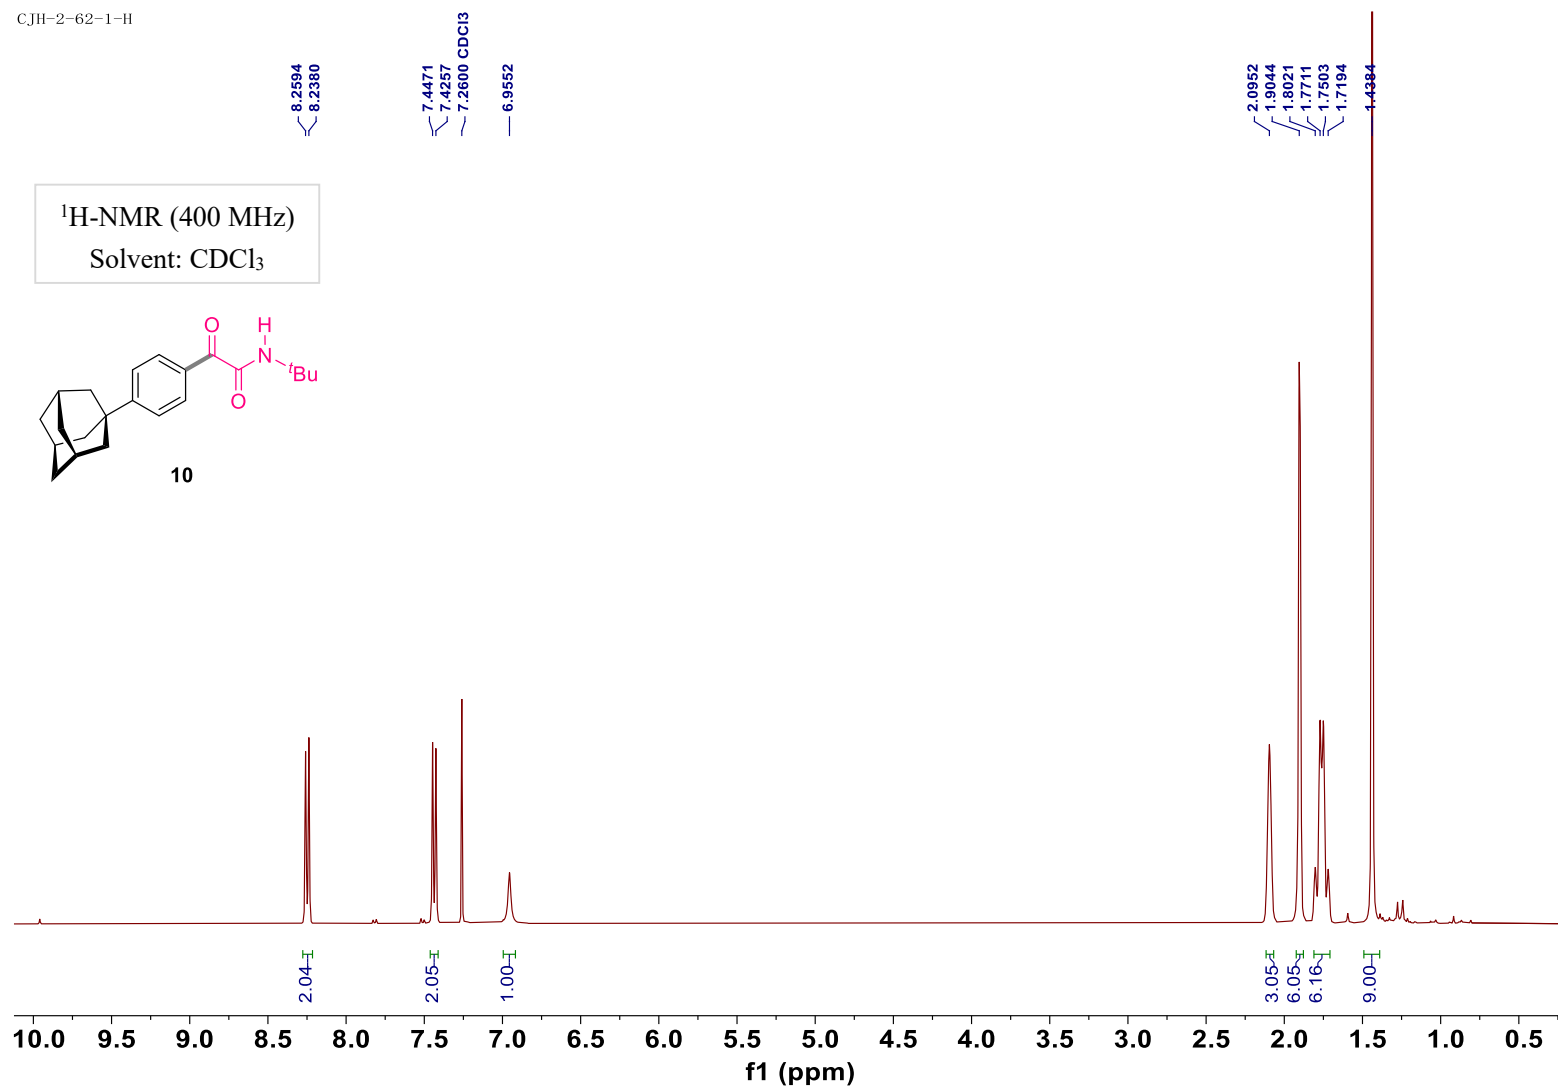

CJH-2-62-1-C

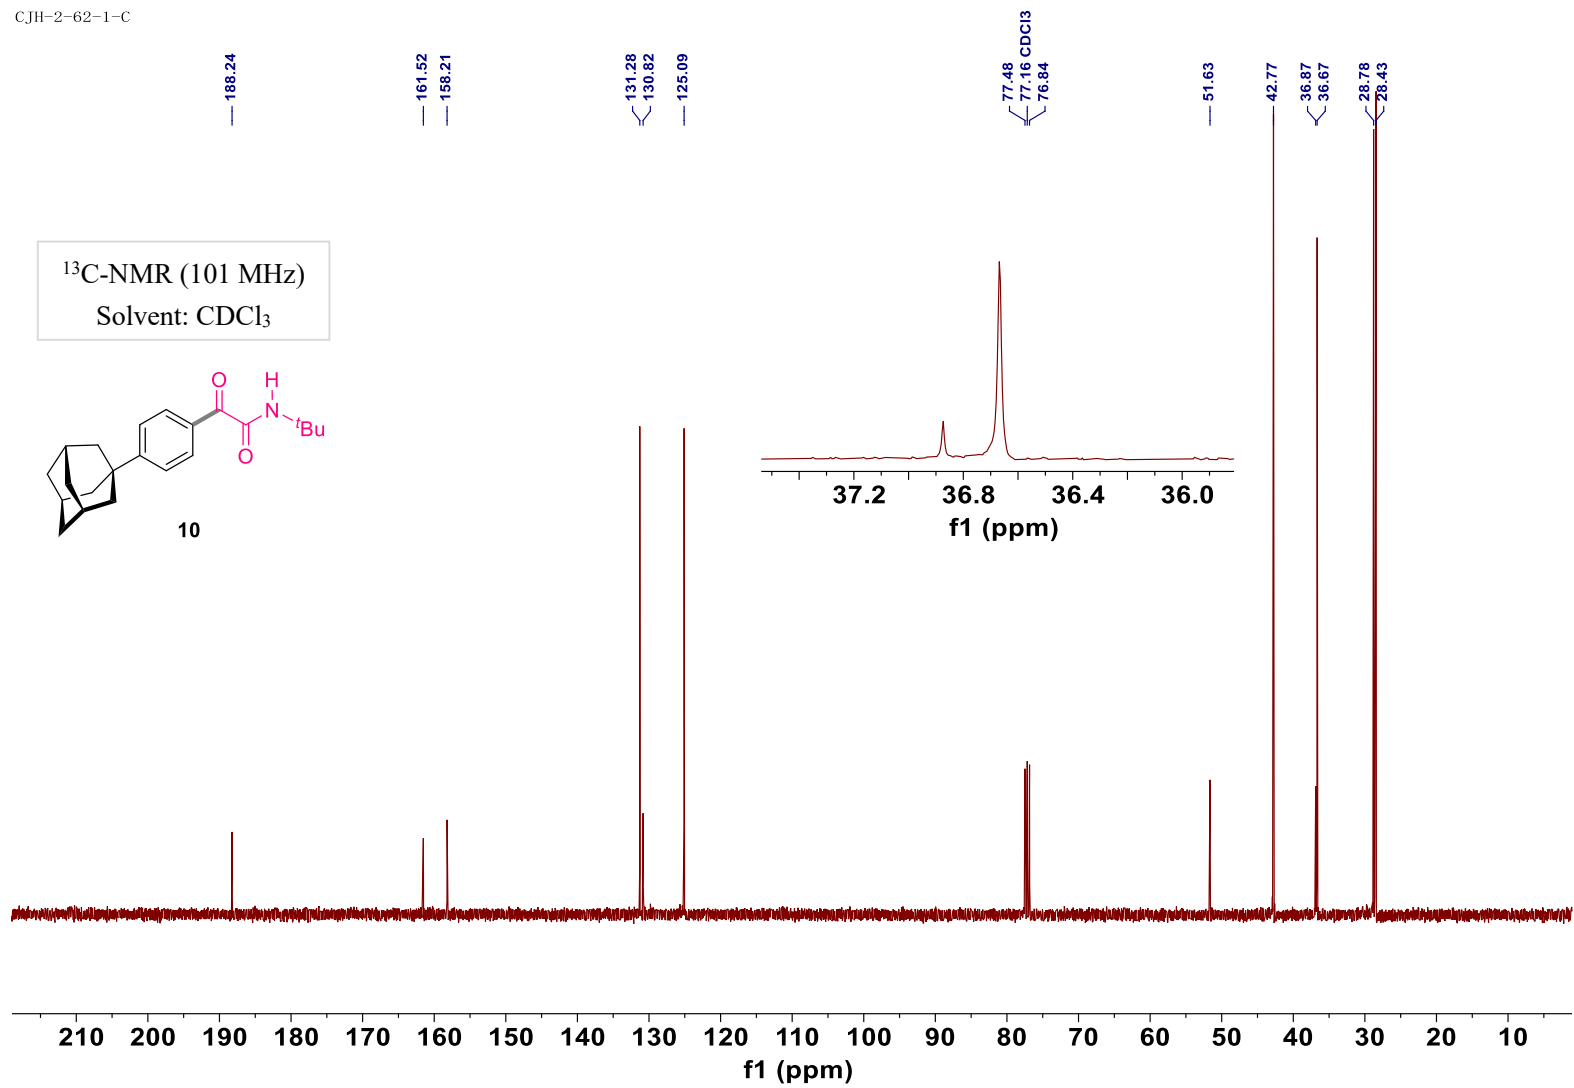

CJH-3-55-1-H

<sup>1</sup>H-NMR (400 MHz)  
Solvent: CDCl<sub>3</sub>

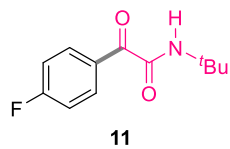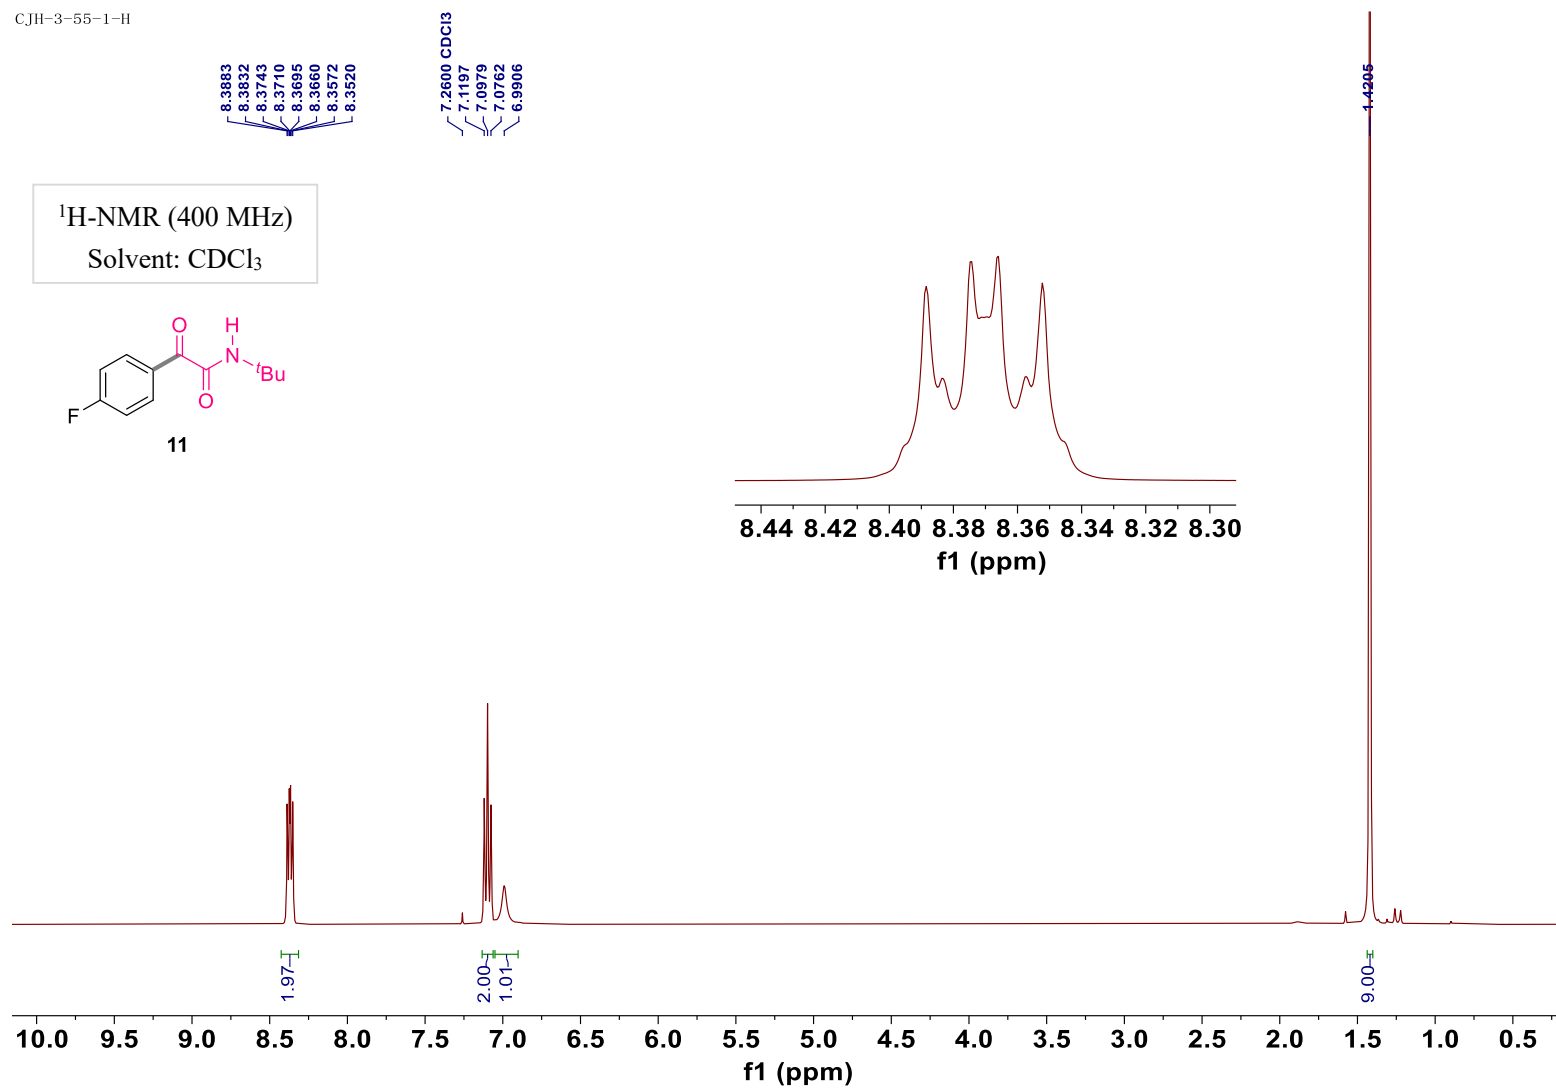

CJH-3-55-1-C

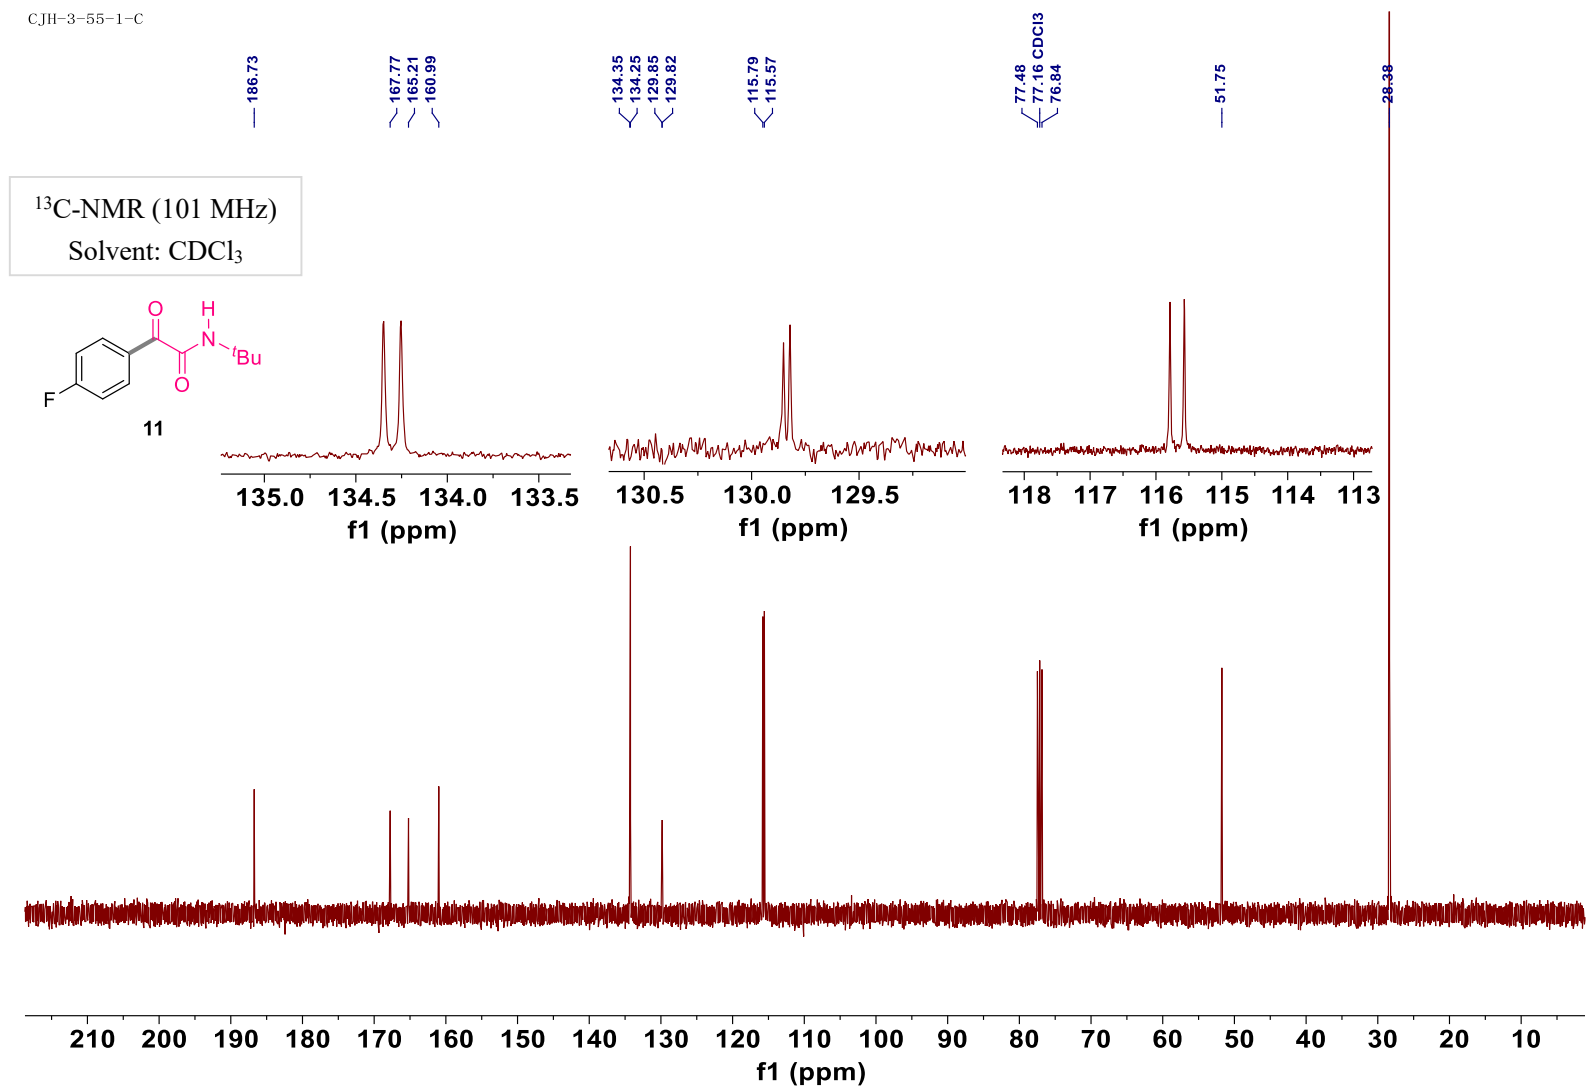



CJH-3-55-1-F

$^{19}\text{F}$ -NMR (376 MHz)

Solvent:  $\text{CDCl}_3$

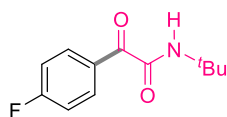

11

-102.5972  
-102.6122  
-102.6194  
-102.6342  
-102.6422  
-102.6493  
-102.6565  
-102.6713

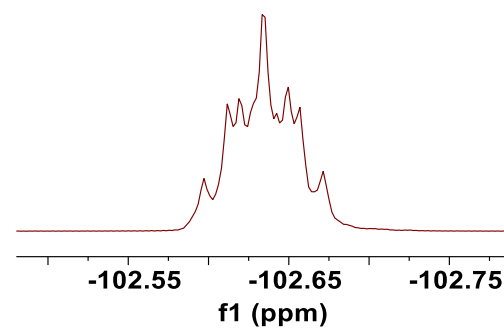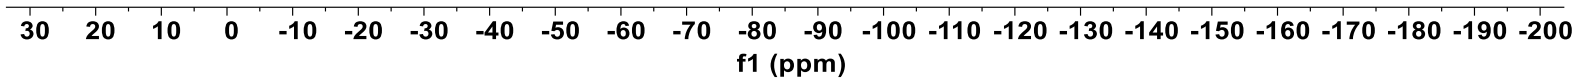

CJH-1-103-2-H

$^1\text{H}$ -NMR (400 MHz)  
Solvent:  $\text{CDCl}_3$

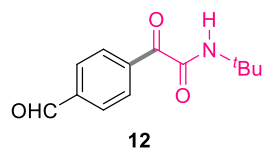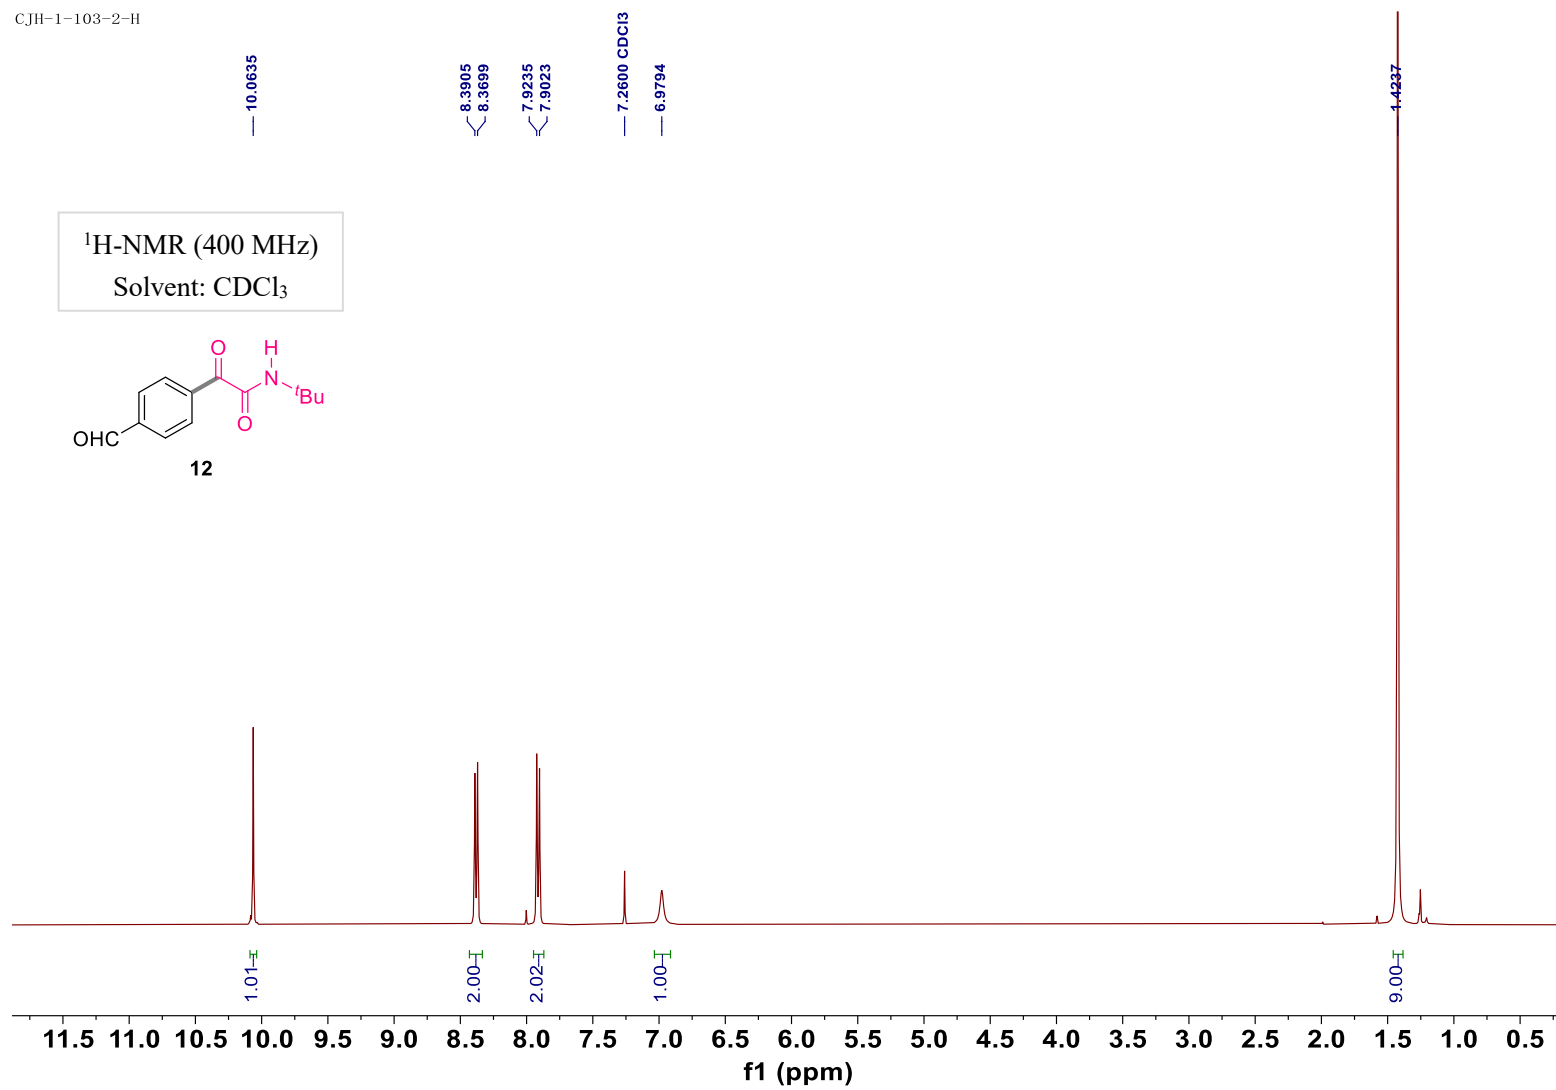

CJH-1-103-2-C

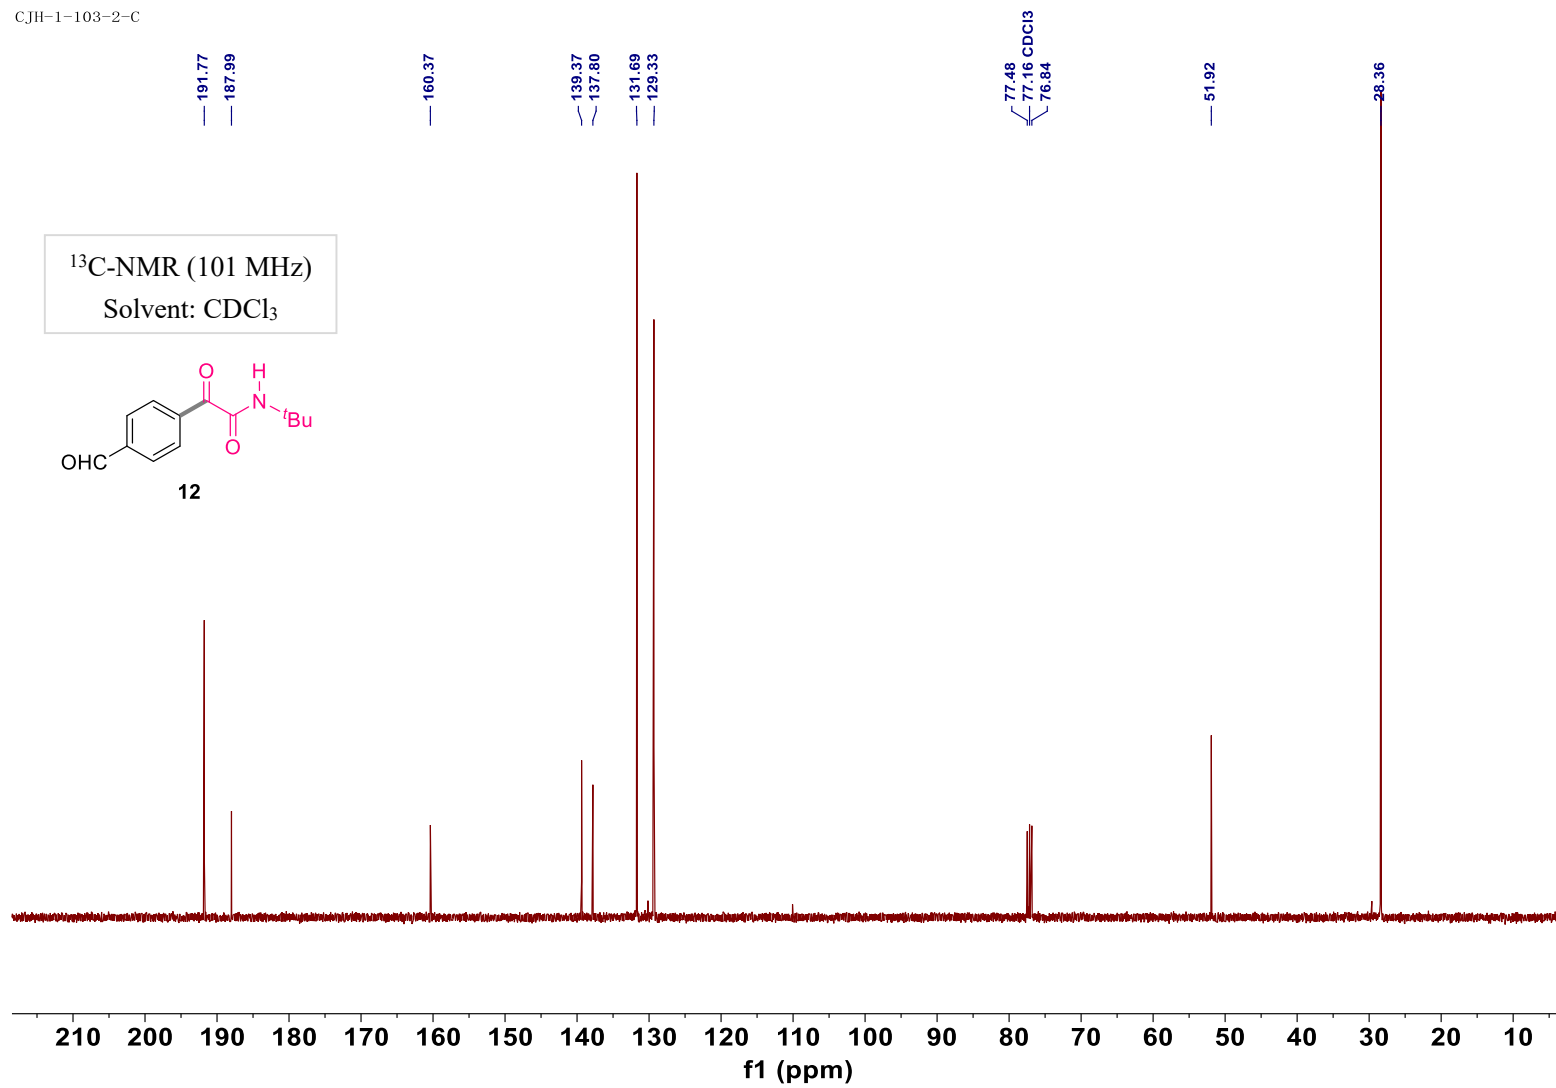

S100

CJH-1-103-3-H

<sup>1</sup>H-NMR (400 MHz)  
Solvent: CDCl<sub>3</sub>

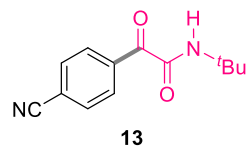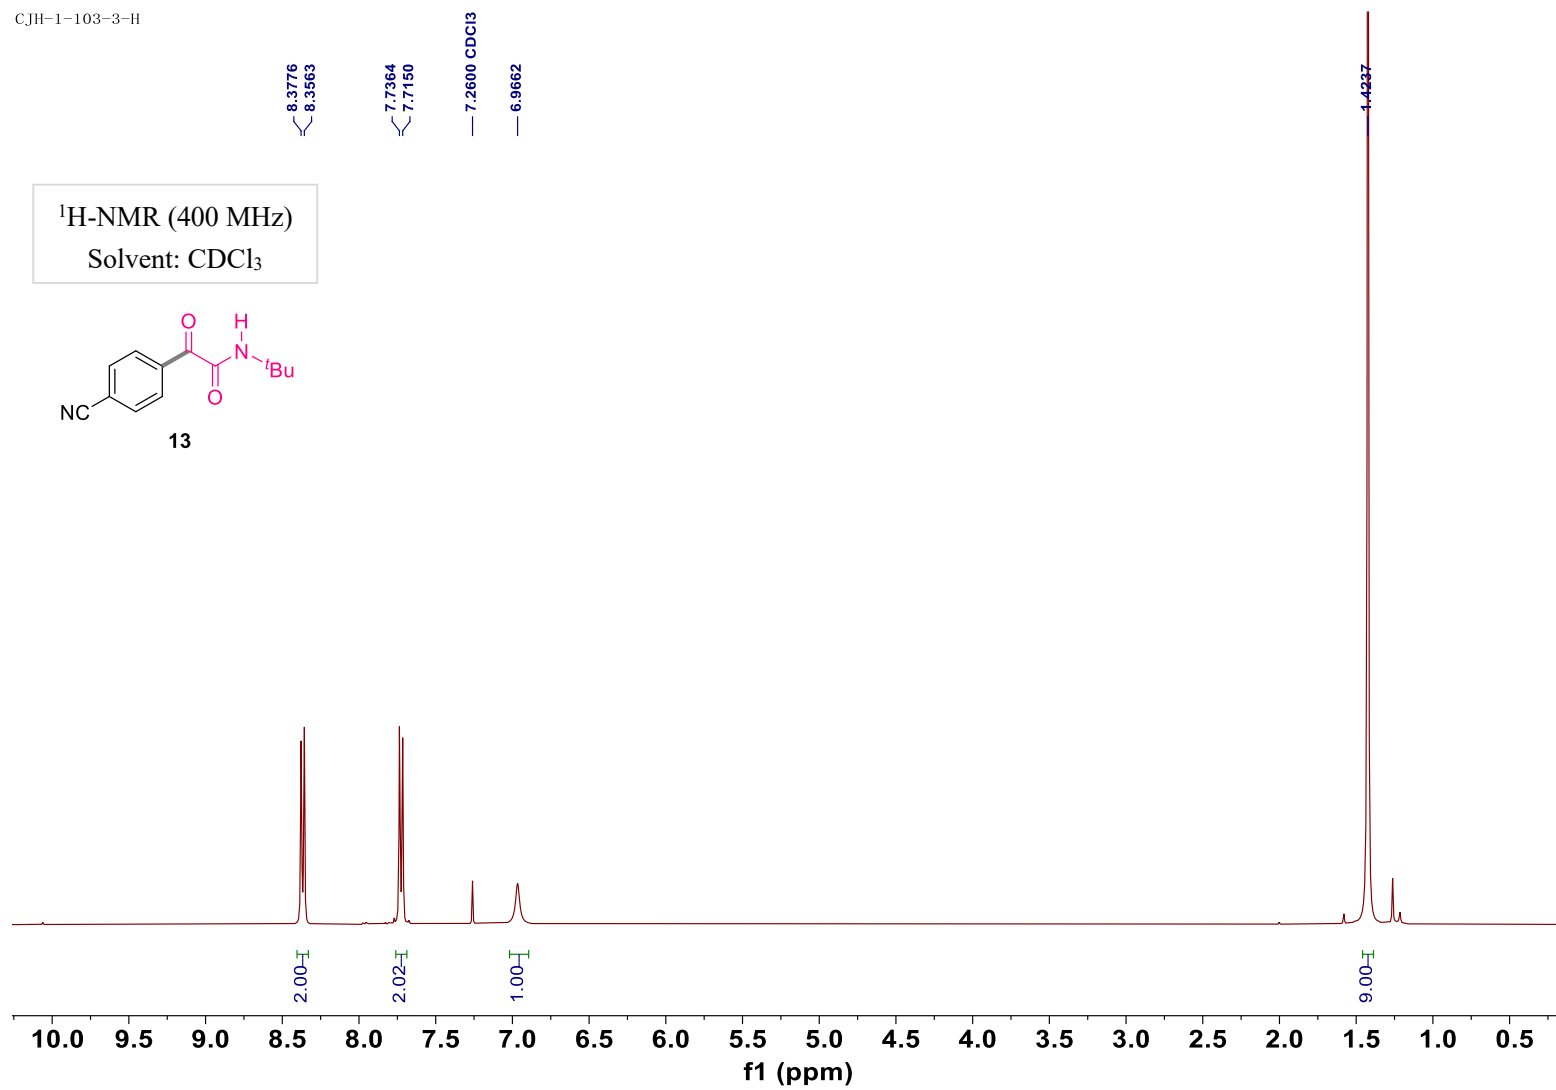

CJH-1-103-3-C

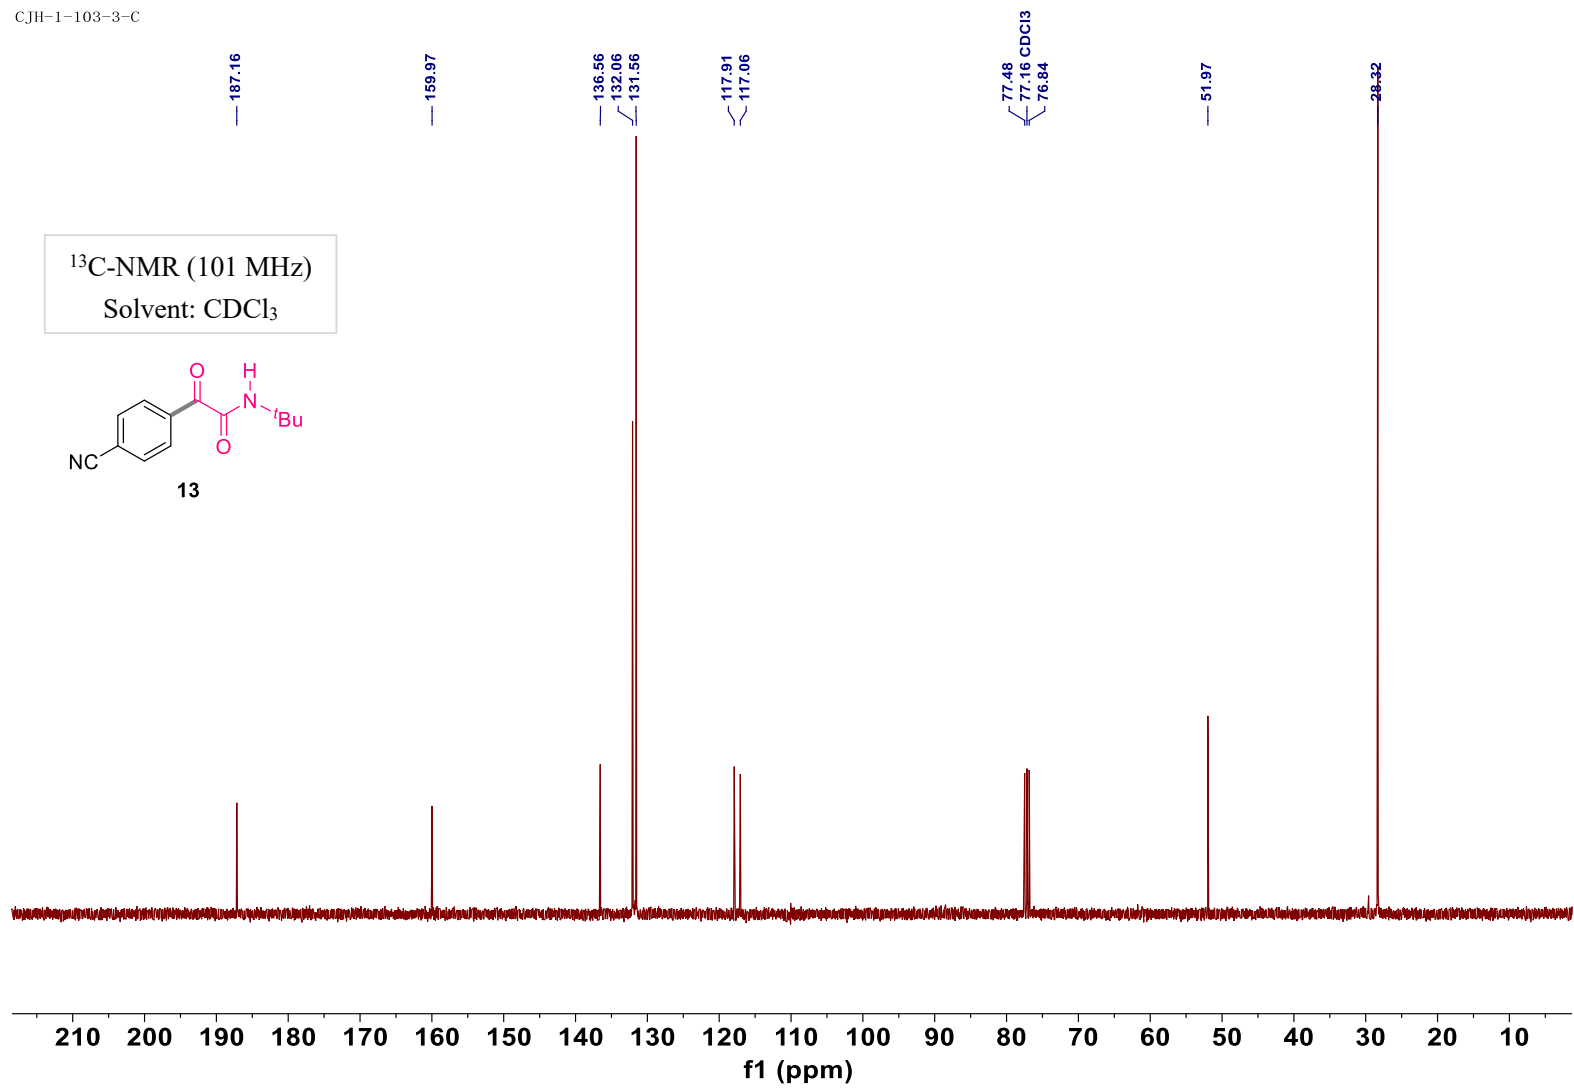

S102

CJH-1-107-1-H

<sup>1</sup>H-NMR (400 MHz)  
Solvent: CDCl<sub>3</sub>

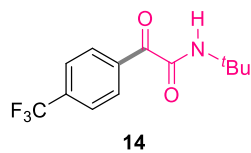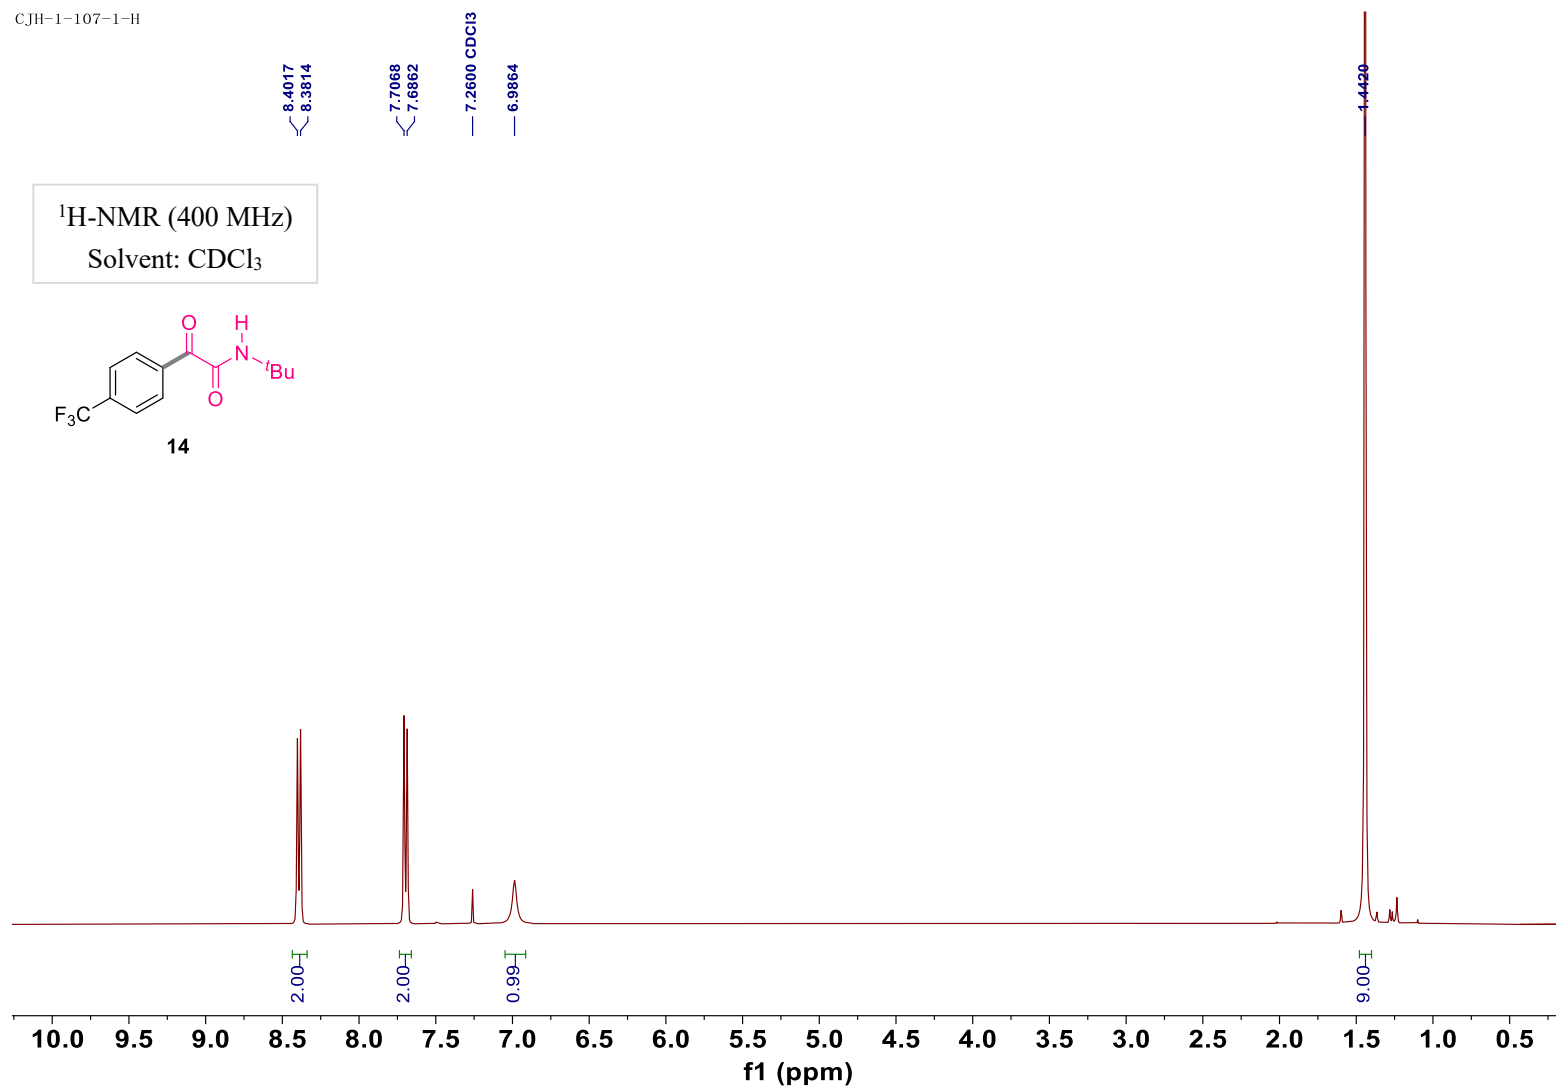

CJH-1-107-1-C

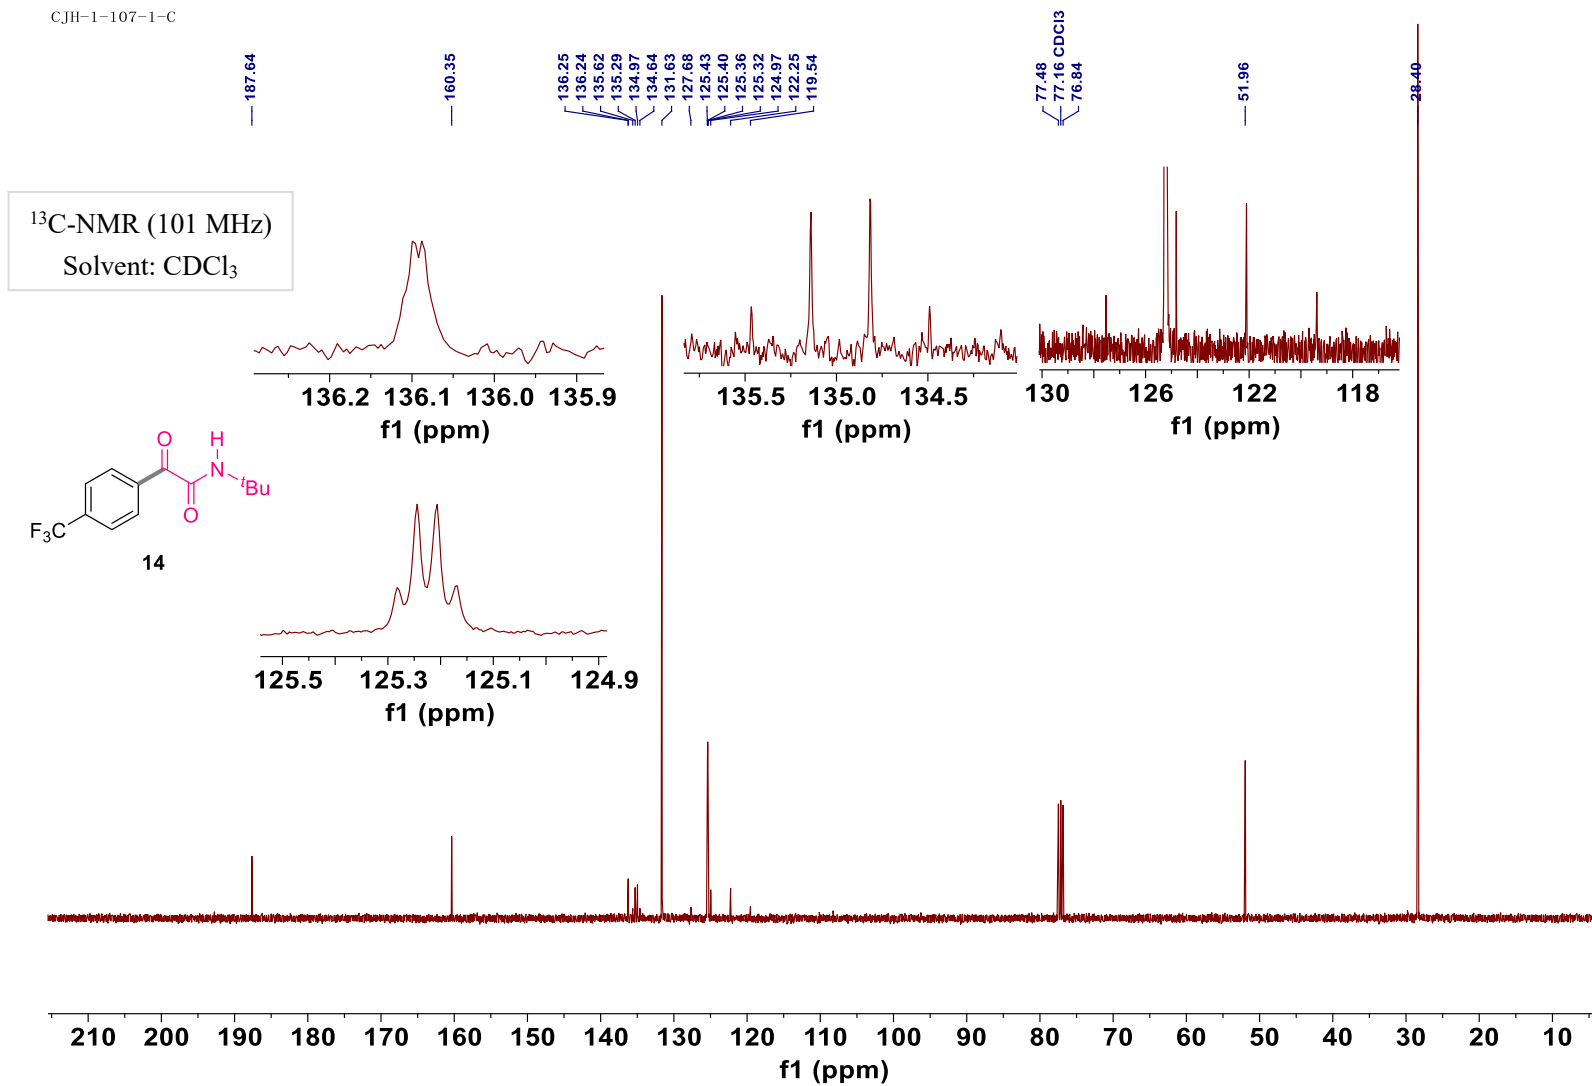

CJH-2-68-2-H

<sup>1</sup>H-NMR (400 MHz)  
Solvent: CDCl<sub>3</sub>

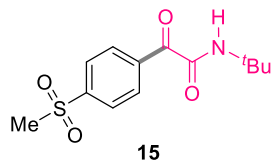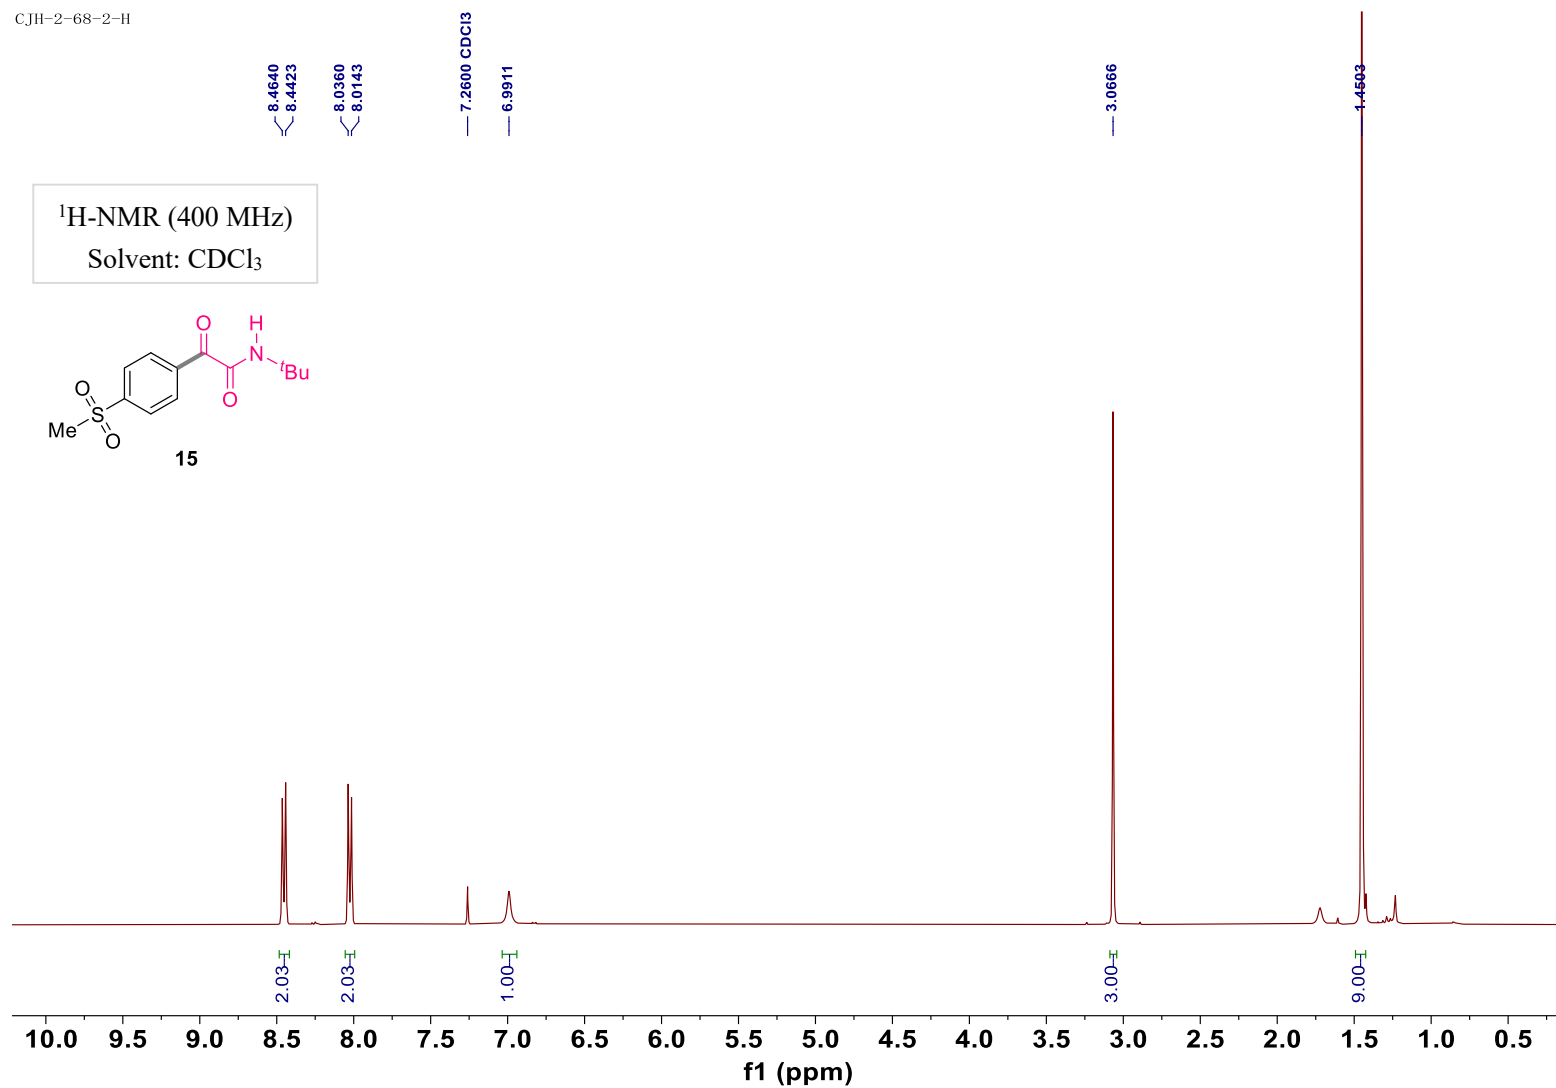



CJH-2-68-2-C

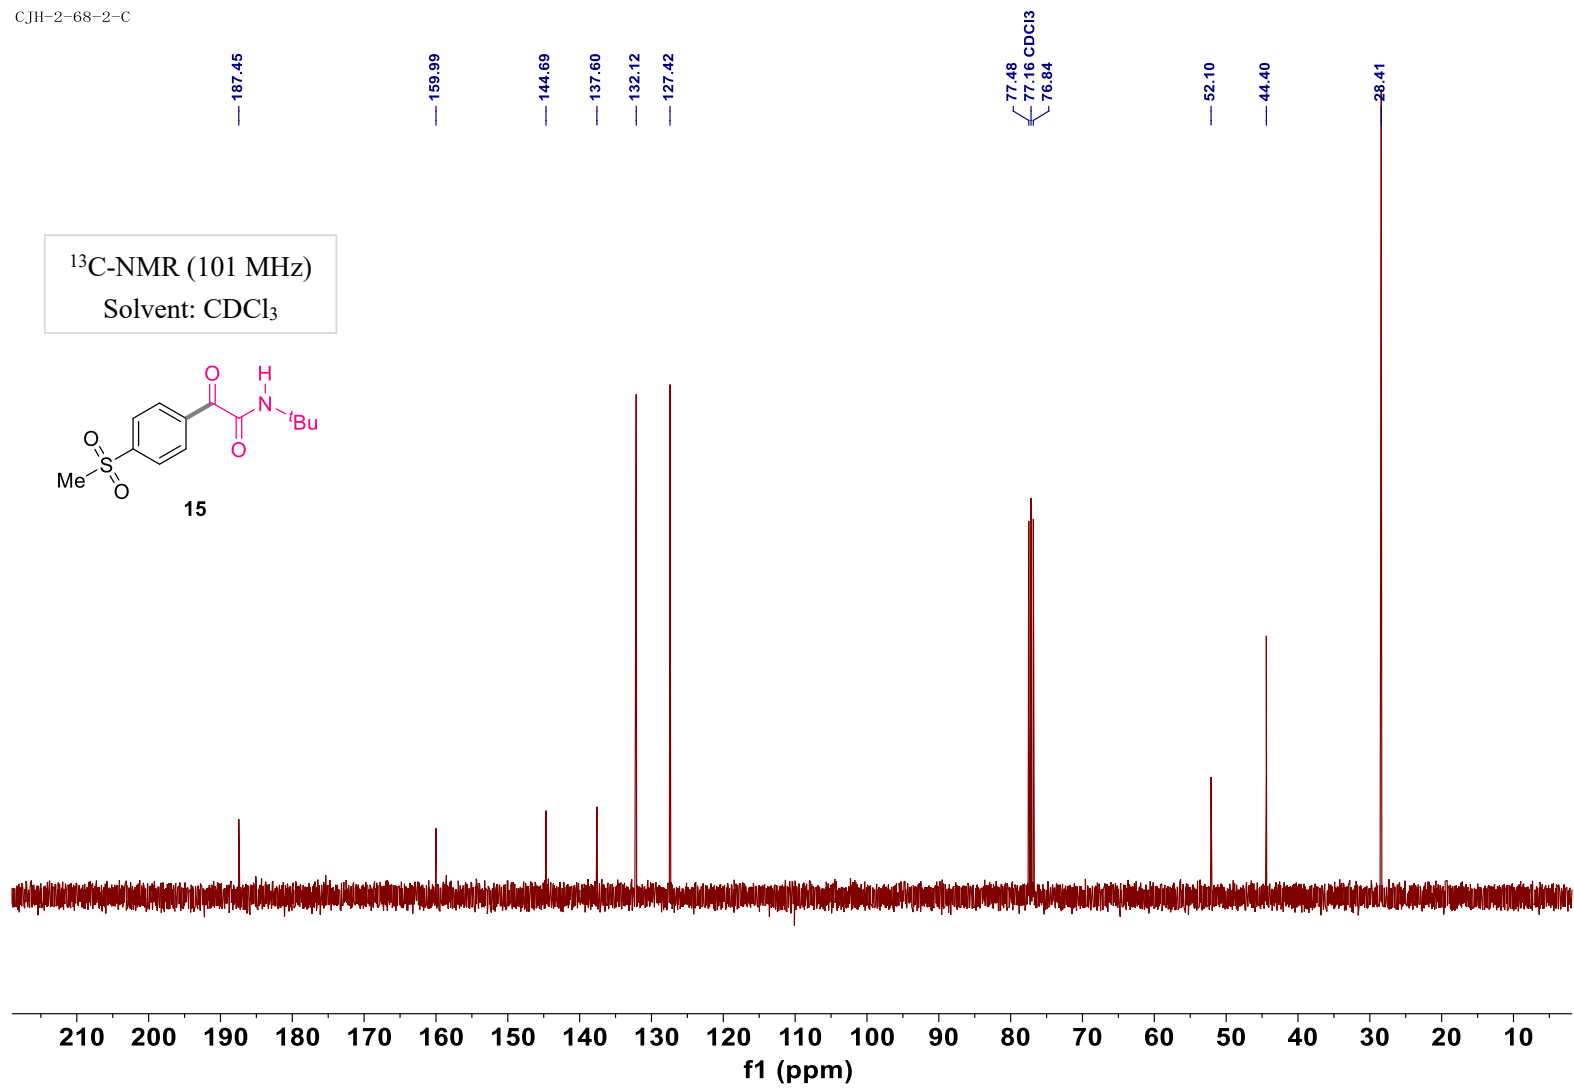

CJH-1-108-1-H

<sup>1</sup>H-NMR (400 MHz)

Solvent: CDCl<sub>3</sub>

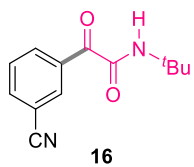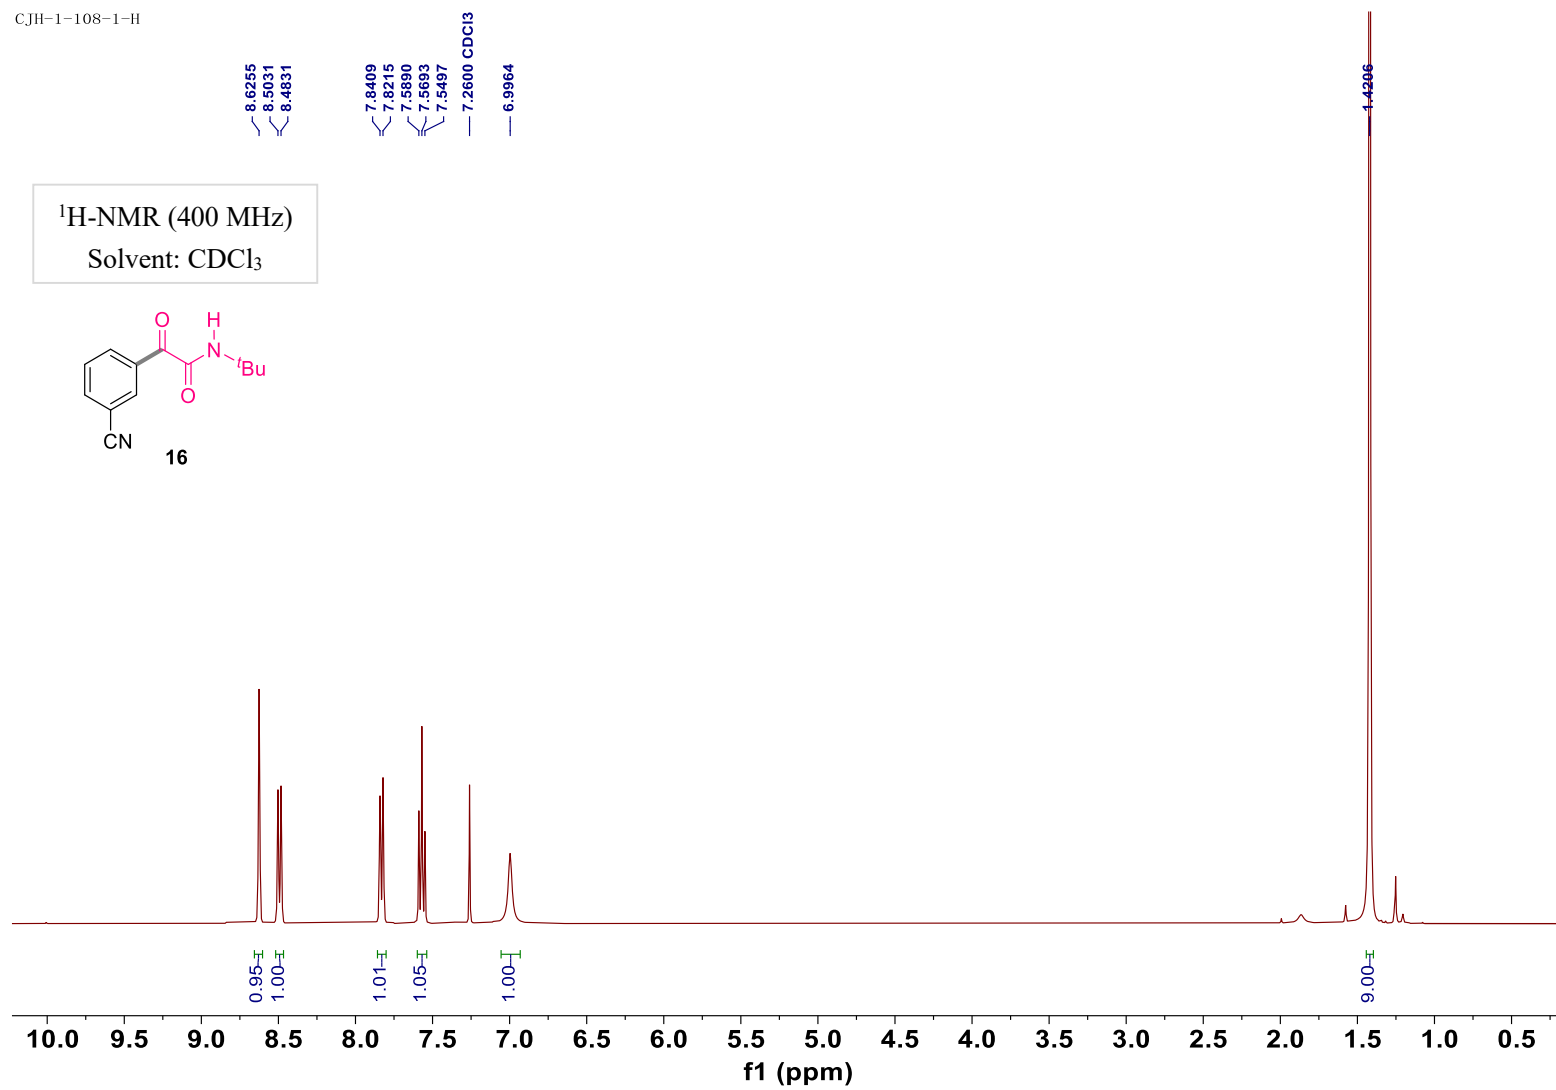

S107

CJH-1-108-1-C

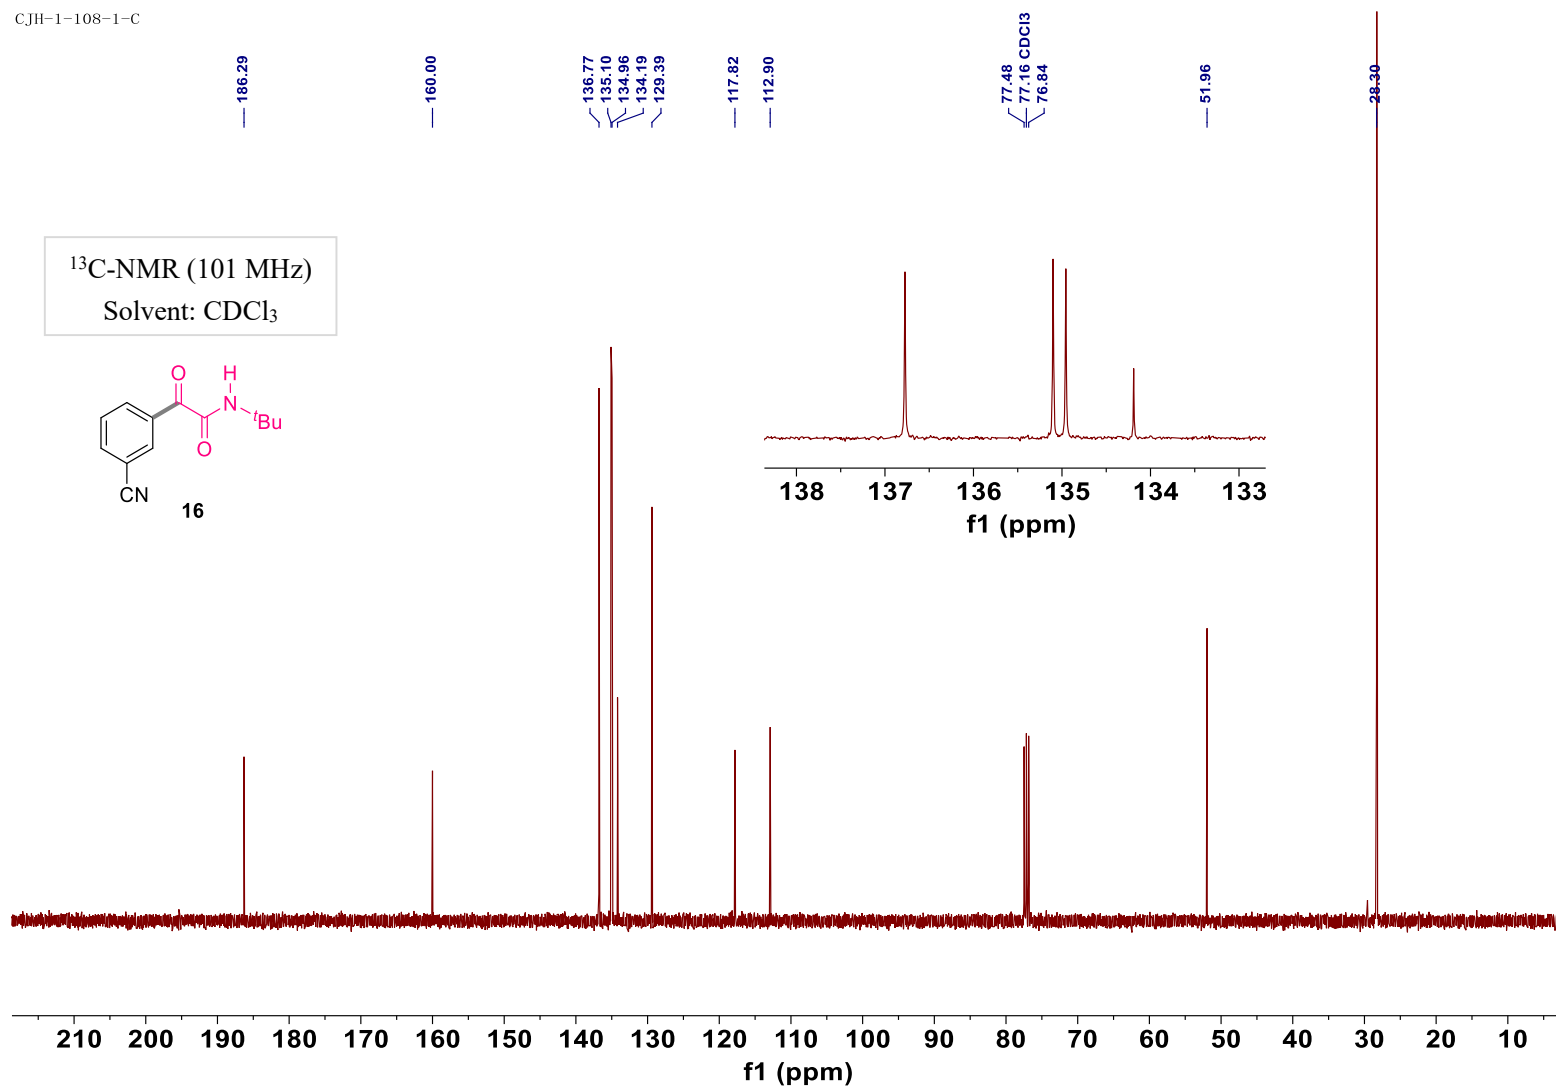

CJH-1-108-2-H

<sup>1</sup>H-NMR (400 MHz)  
Solvent: CDCl<sub>3</sub>

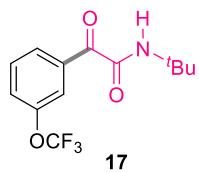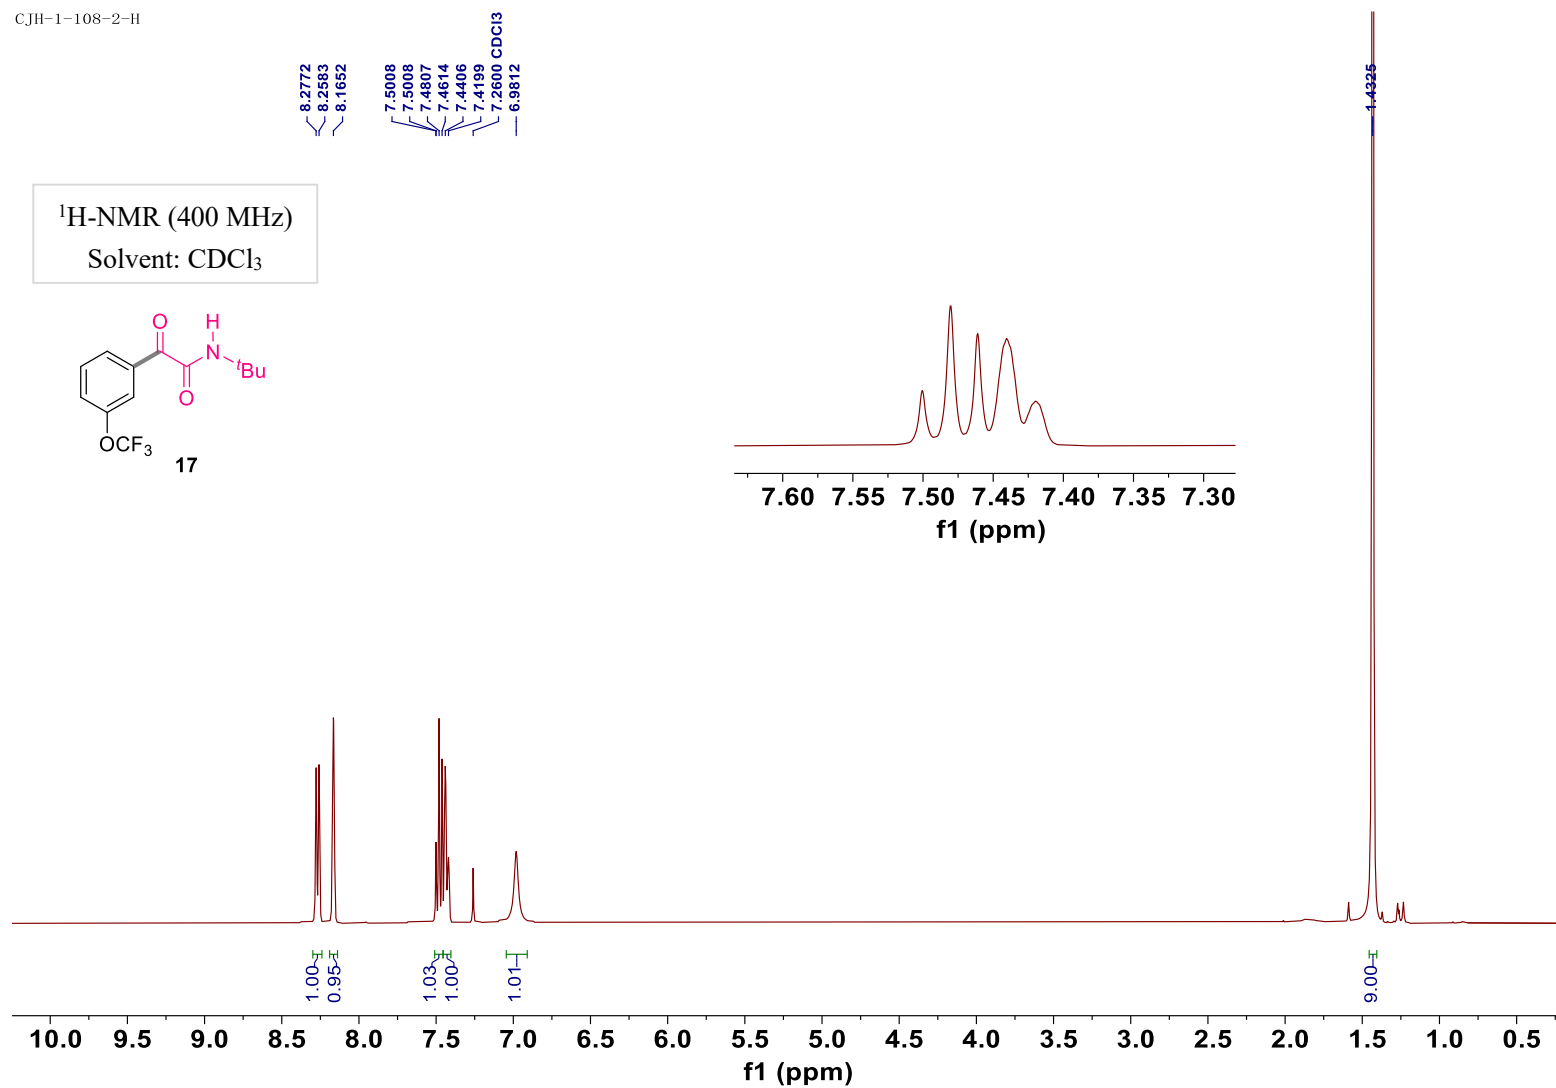

CJH-1-108-2-C

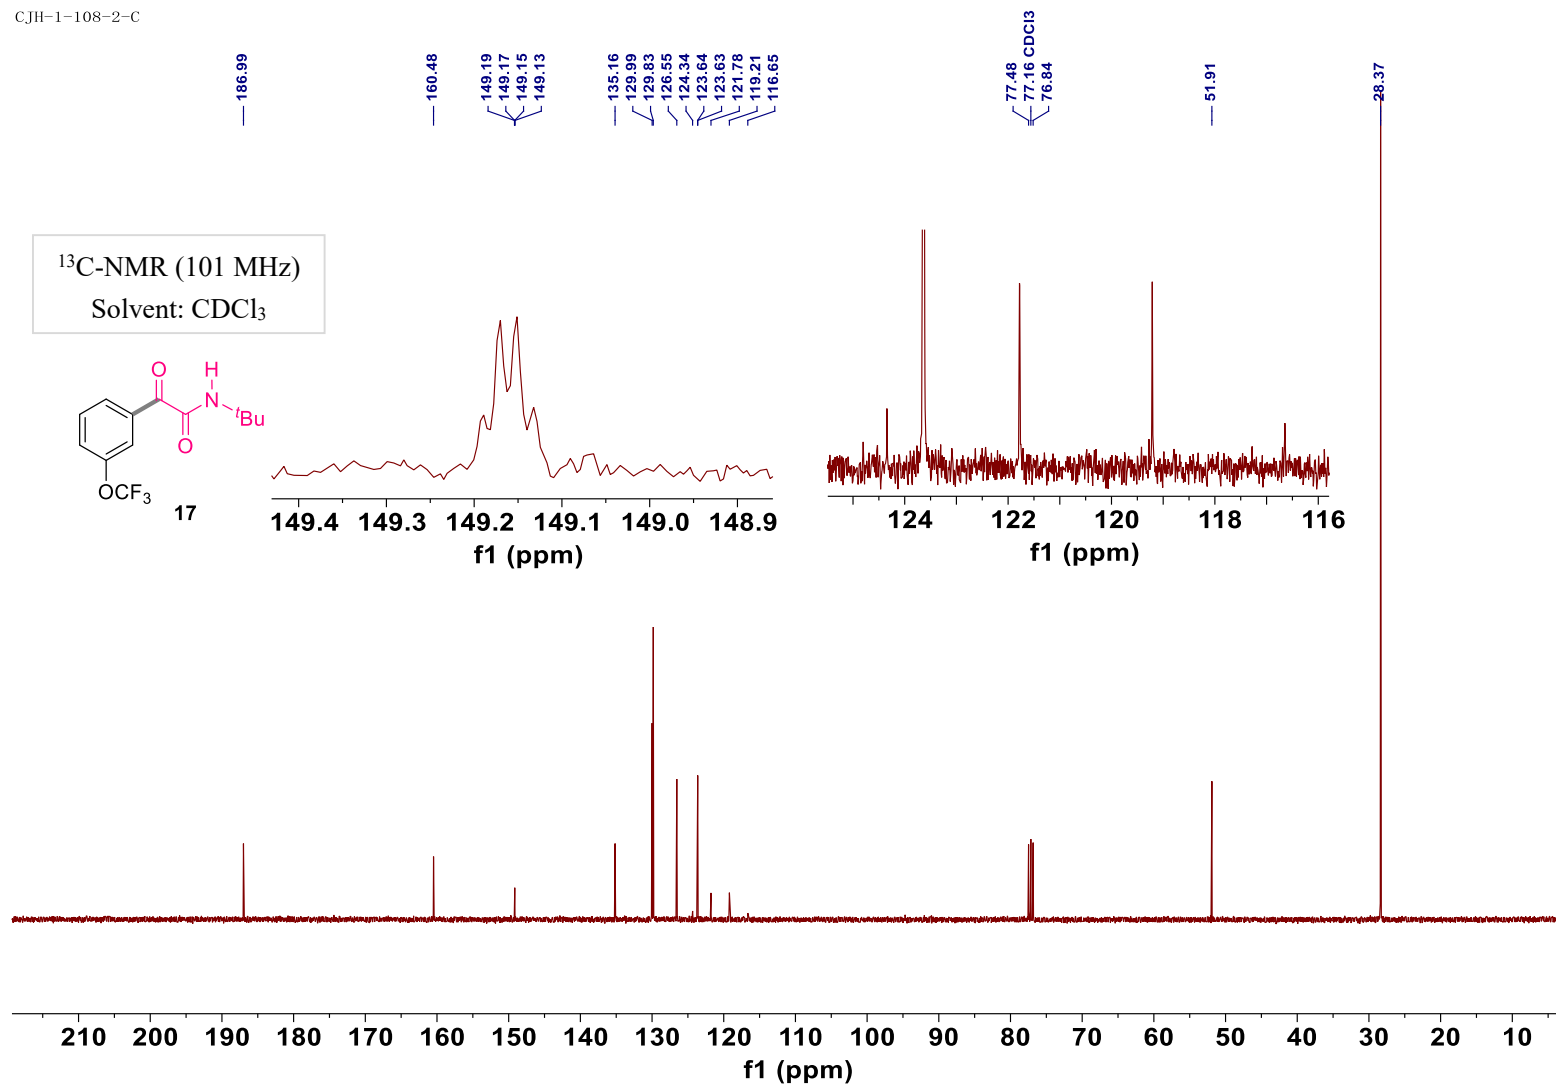

CJH-2-68-1-H

<sup>1</sup>H-NMR (400 MHz)  
Solvent: CDCl<sub>3</sub>

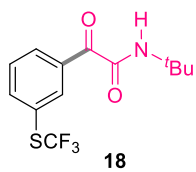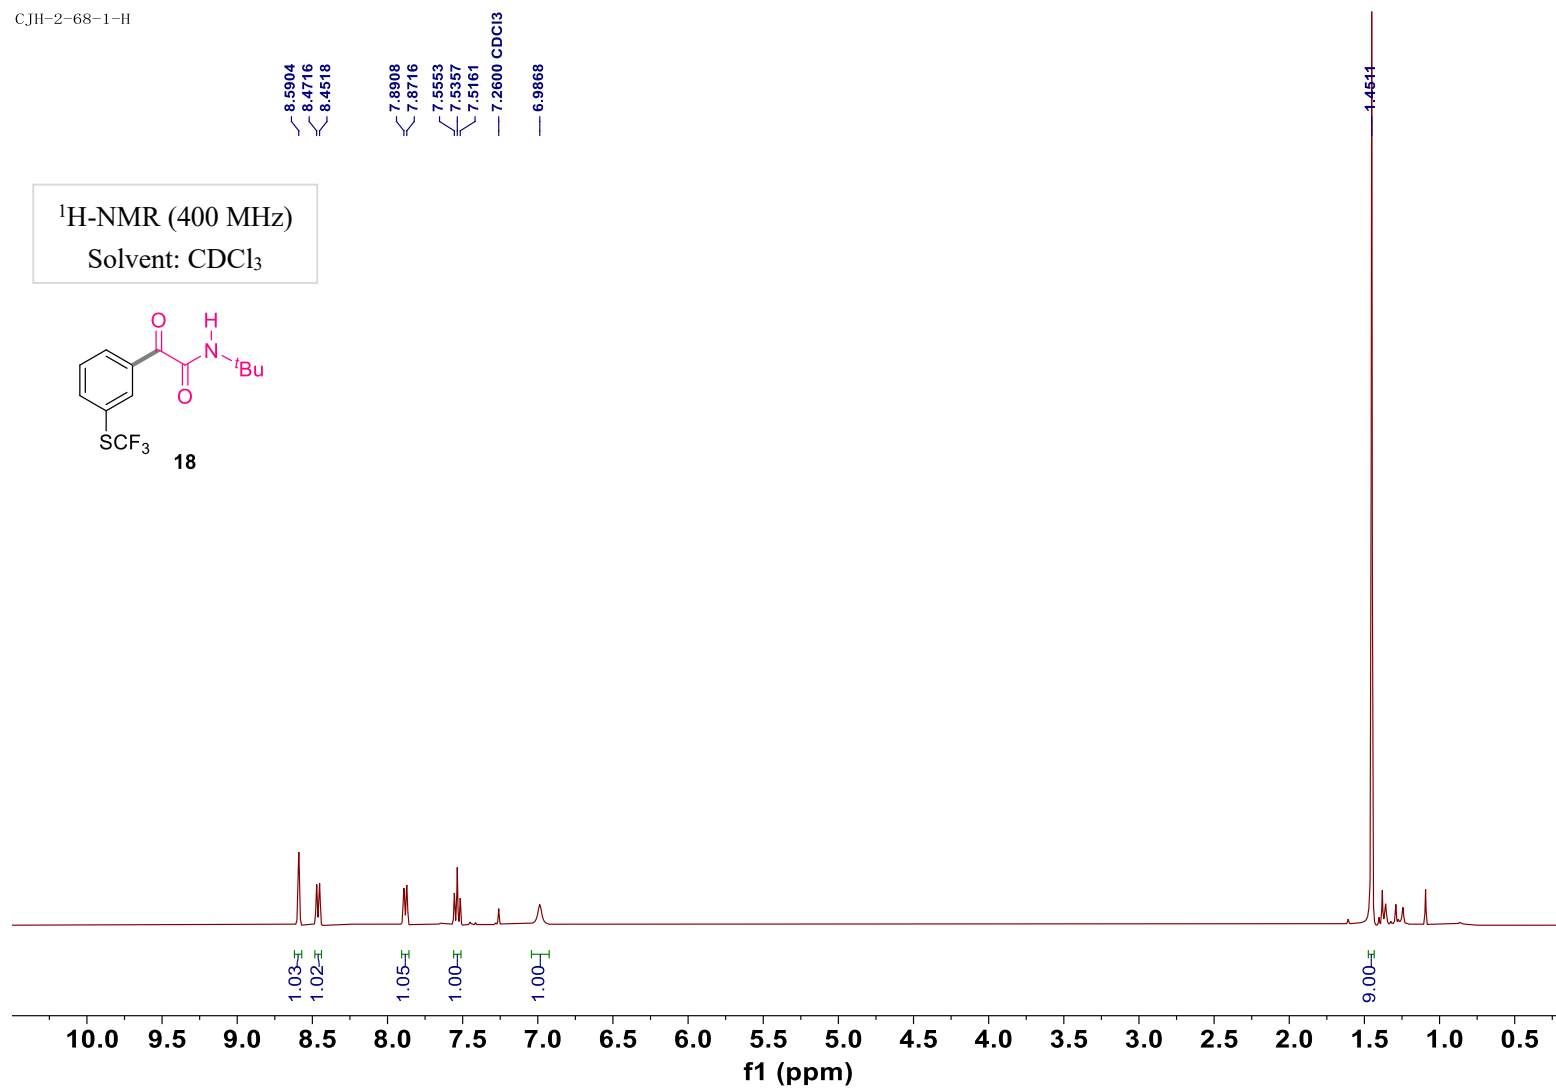

S111

CJH-2-68-1-C

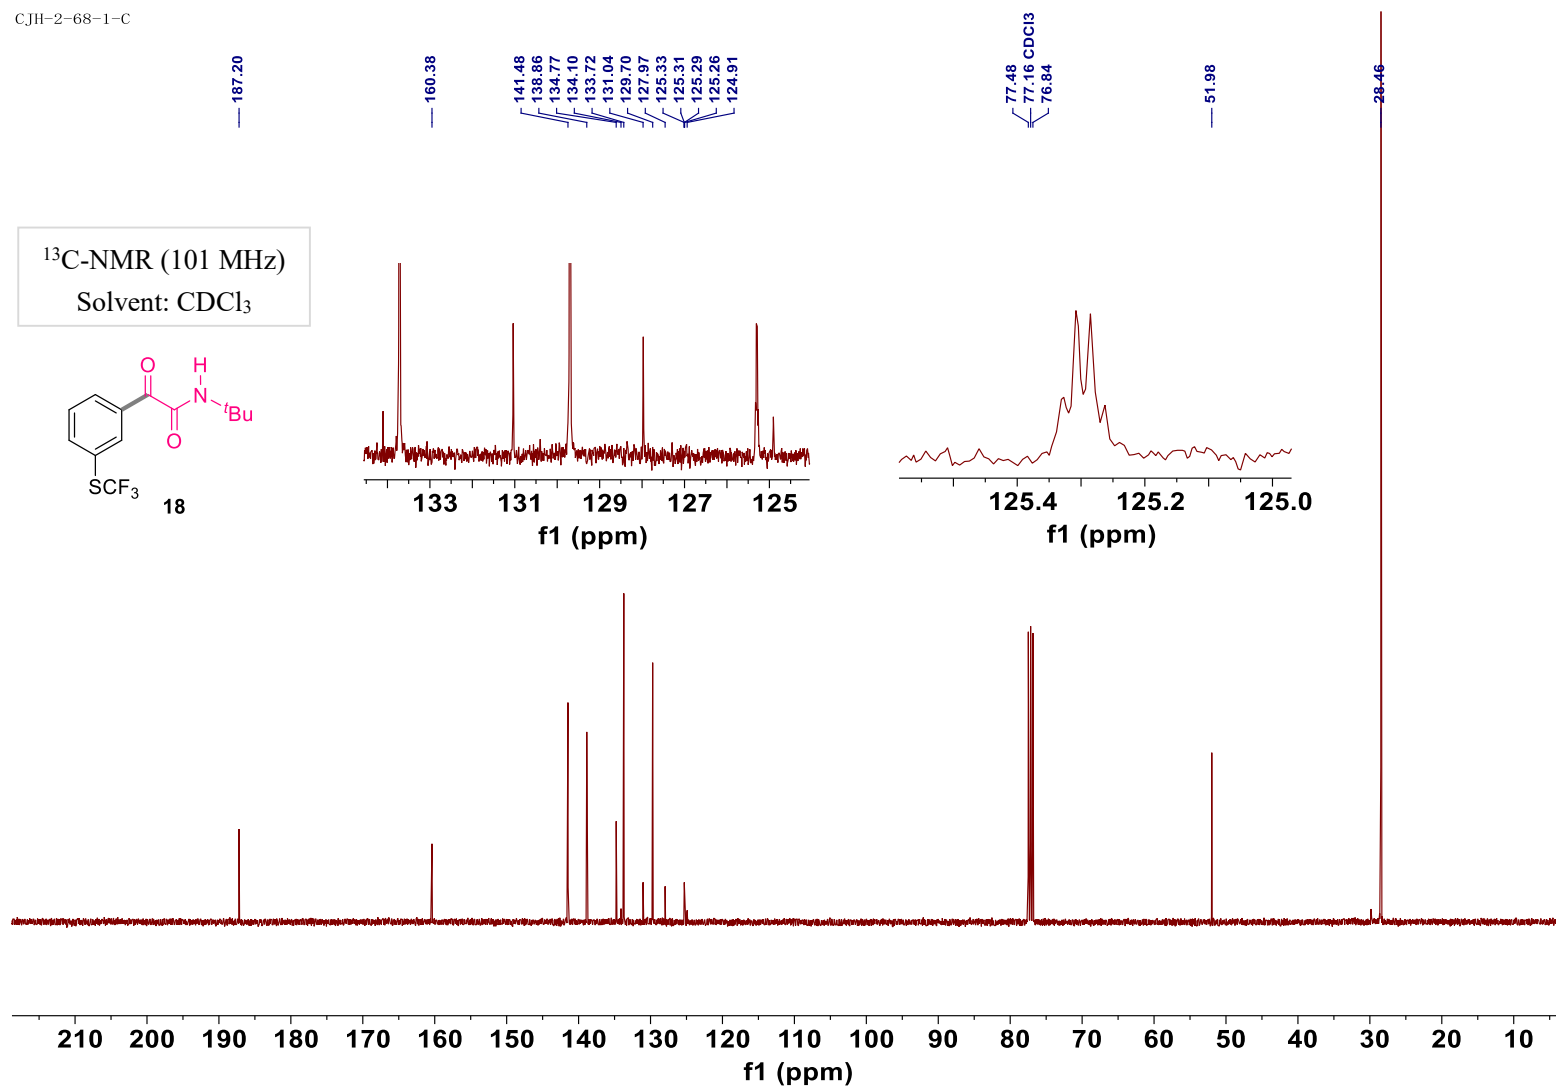

CJH-1-104-2-H

<sup>1</sup>H-NMR (400 MHz)  
Solvent: CDCl<sub>3</sub>

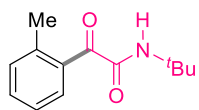

**19**

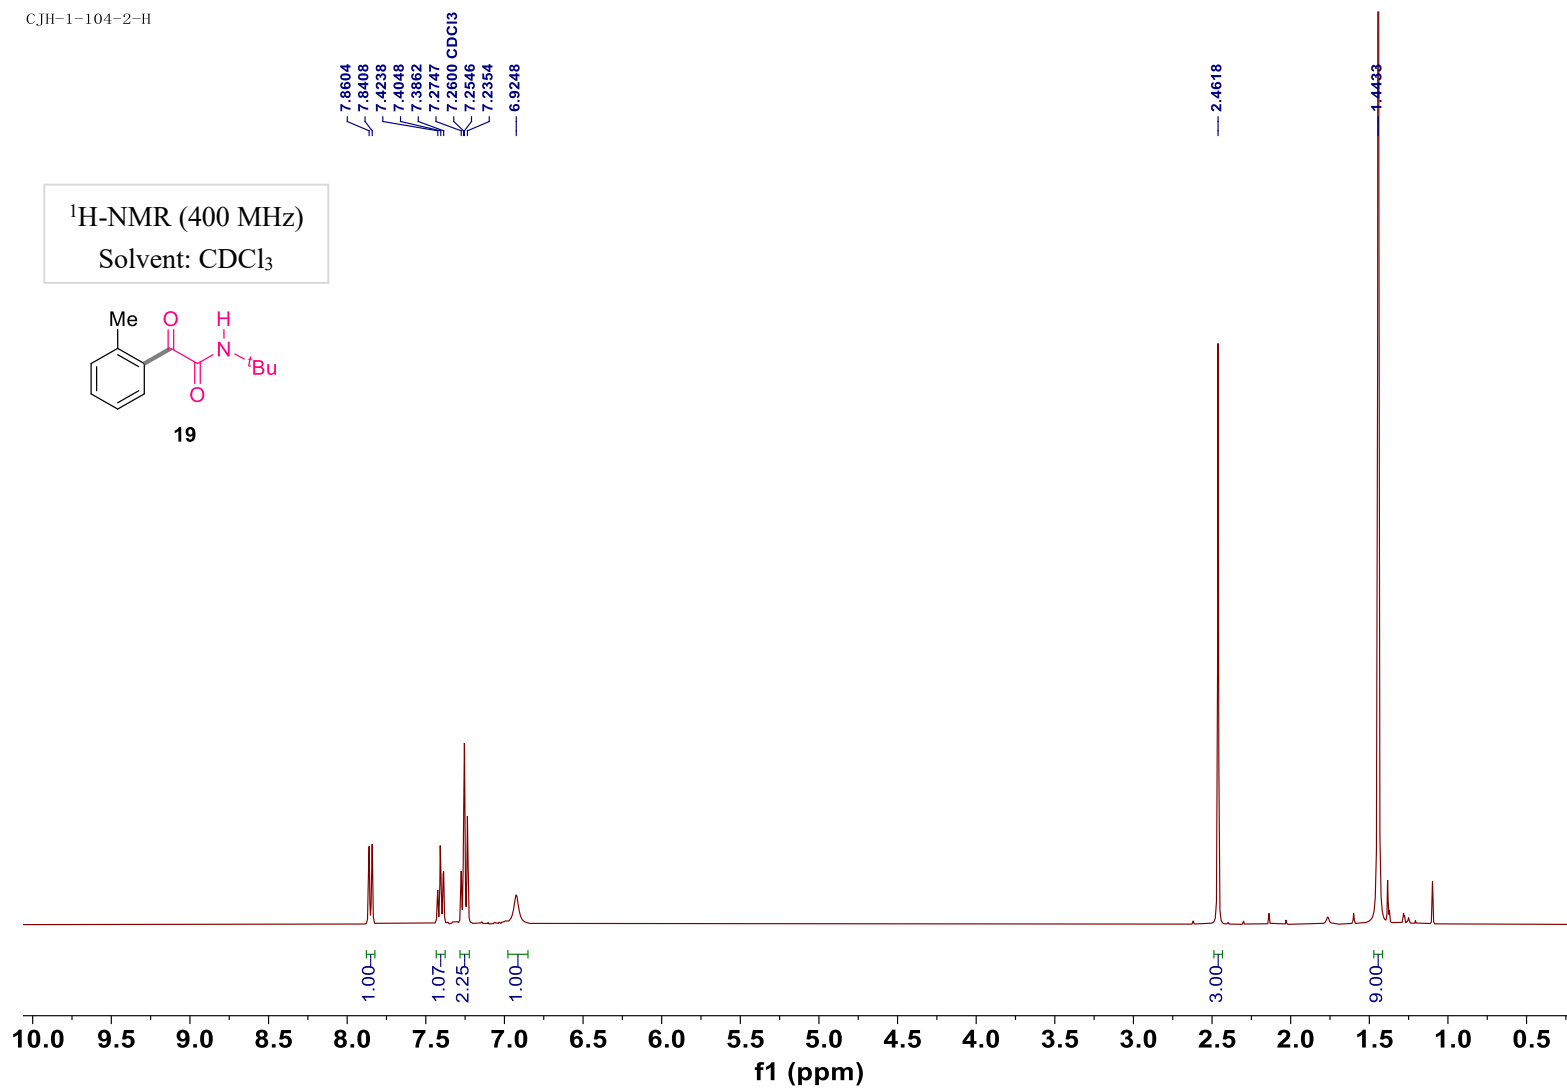

S113



CJH-1-104-2-C

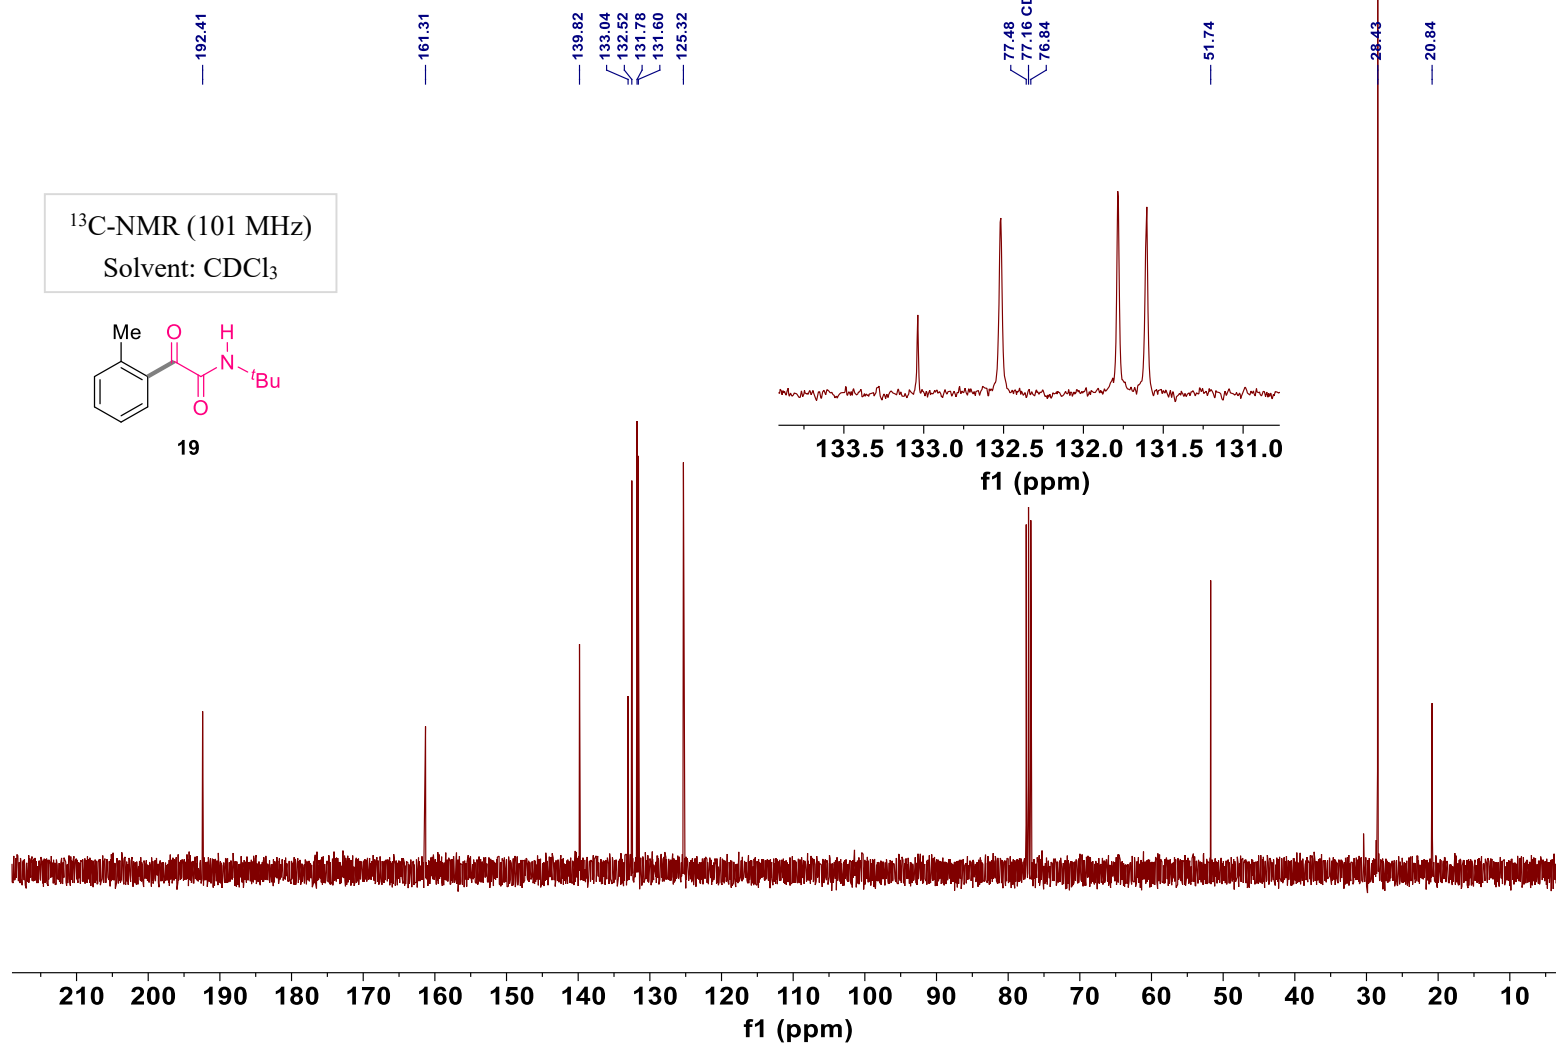

CJH-1-109-2-H

$^1\text{H}$ -NMR (400 MHz)

Solvent:  $\text{CDCl}_3$

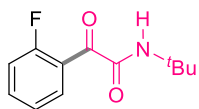

**20**

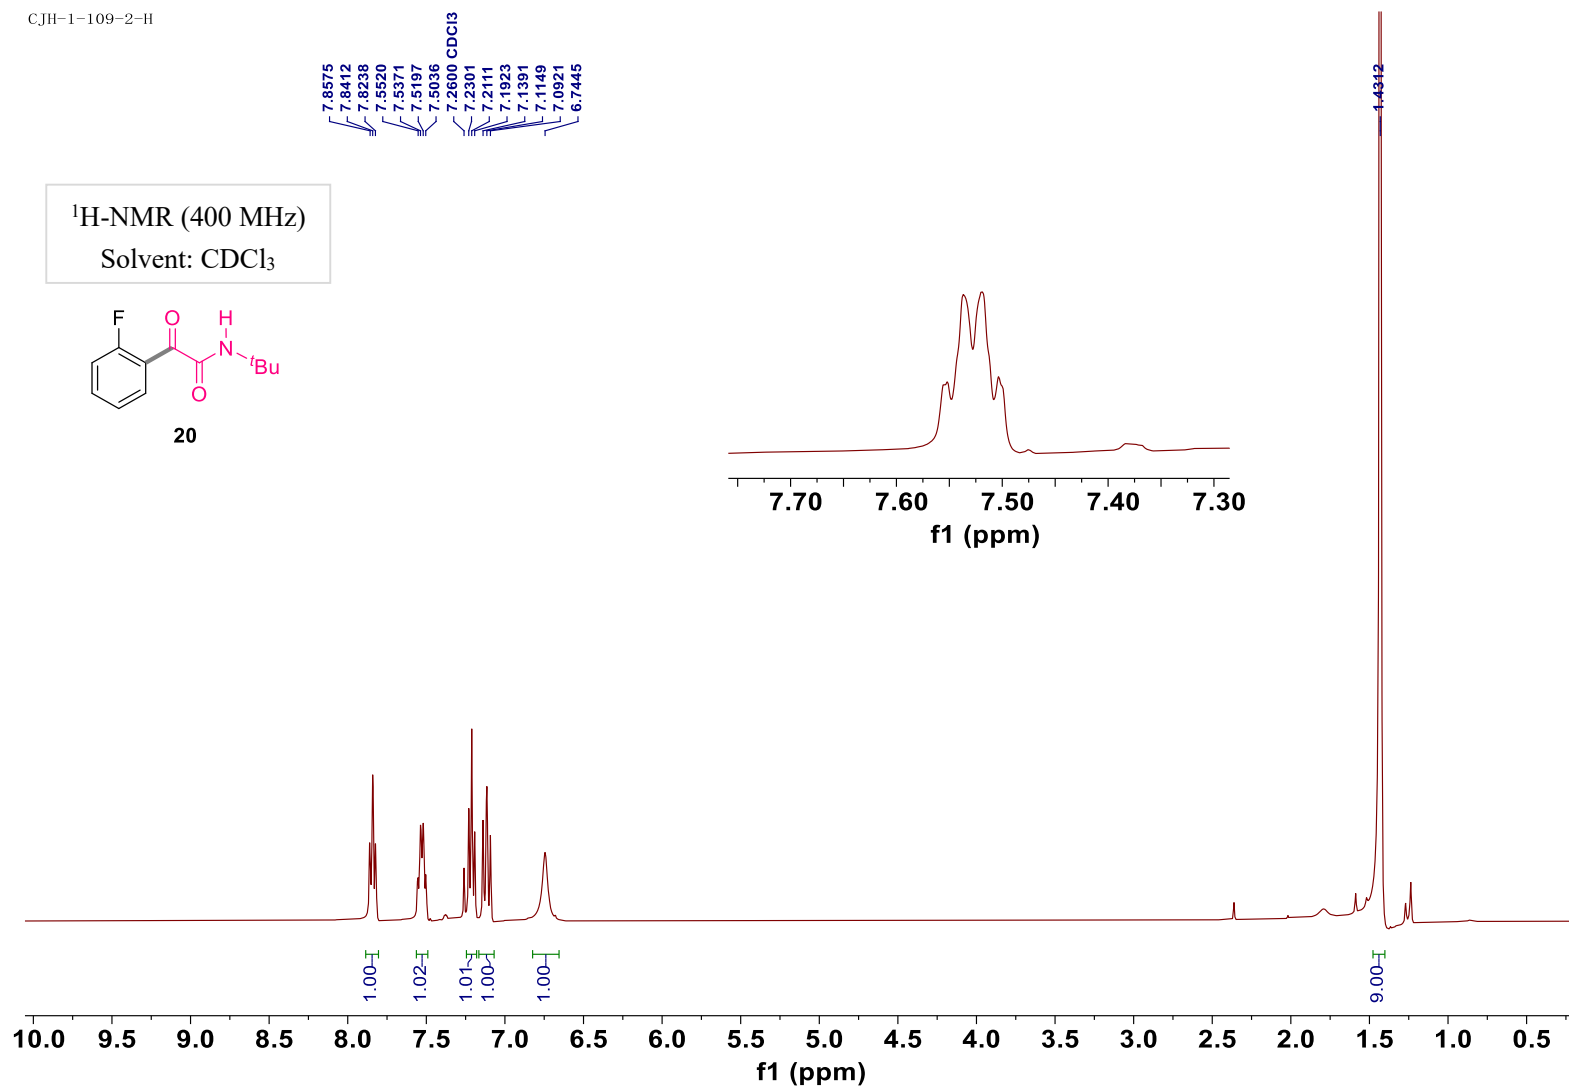

S115

CJH-1-109-2-C

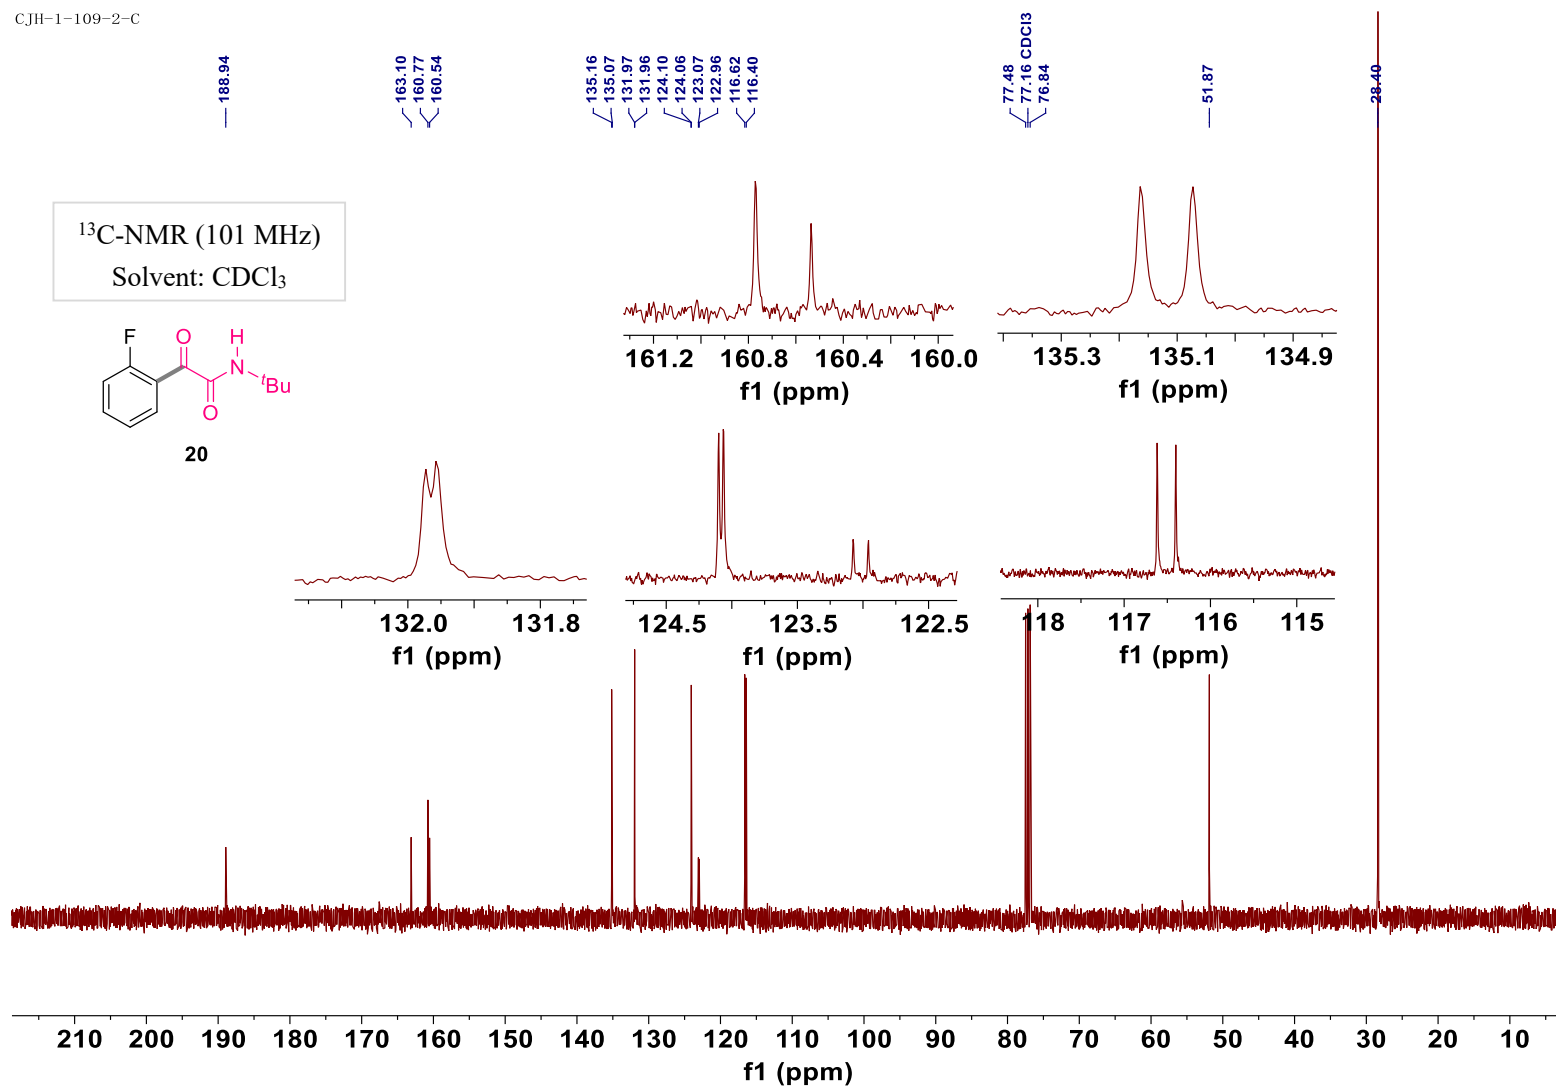

S116

CJH-1-110-2-H

<sup>1</sup>H-NMR (400 MHz)  
Solvent: CDCl<sub>3</sub>

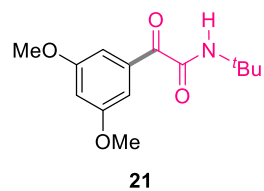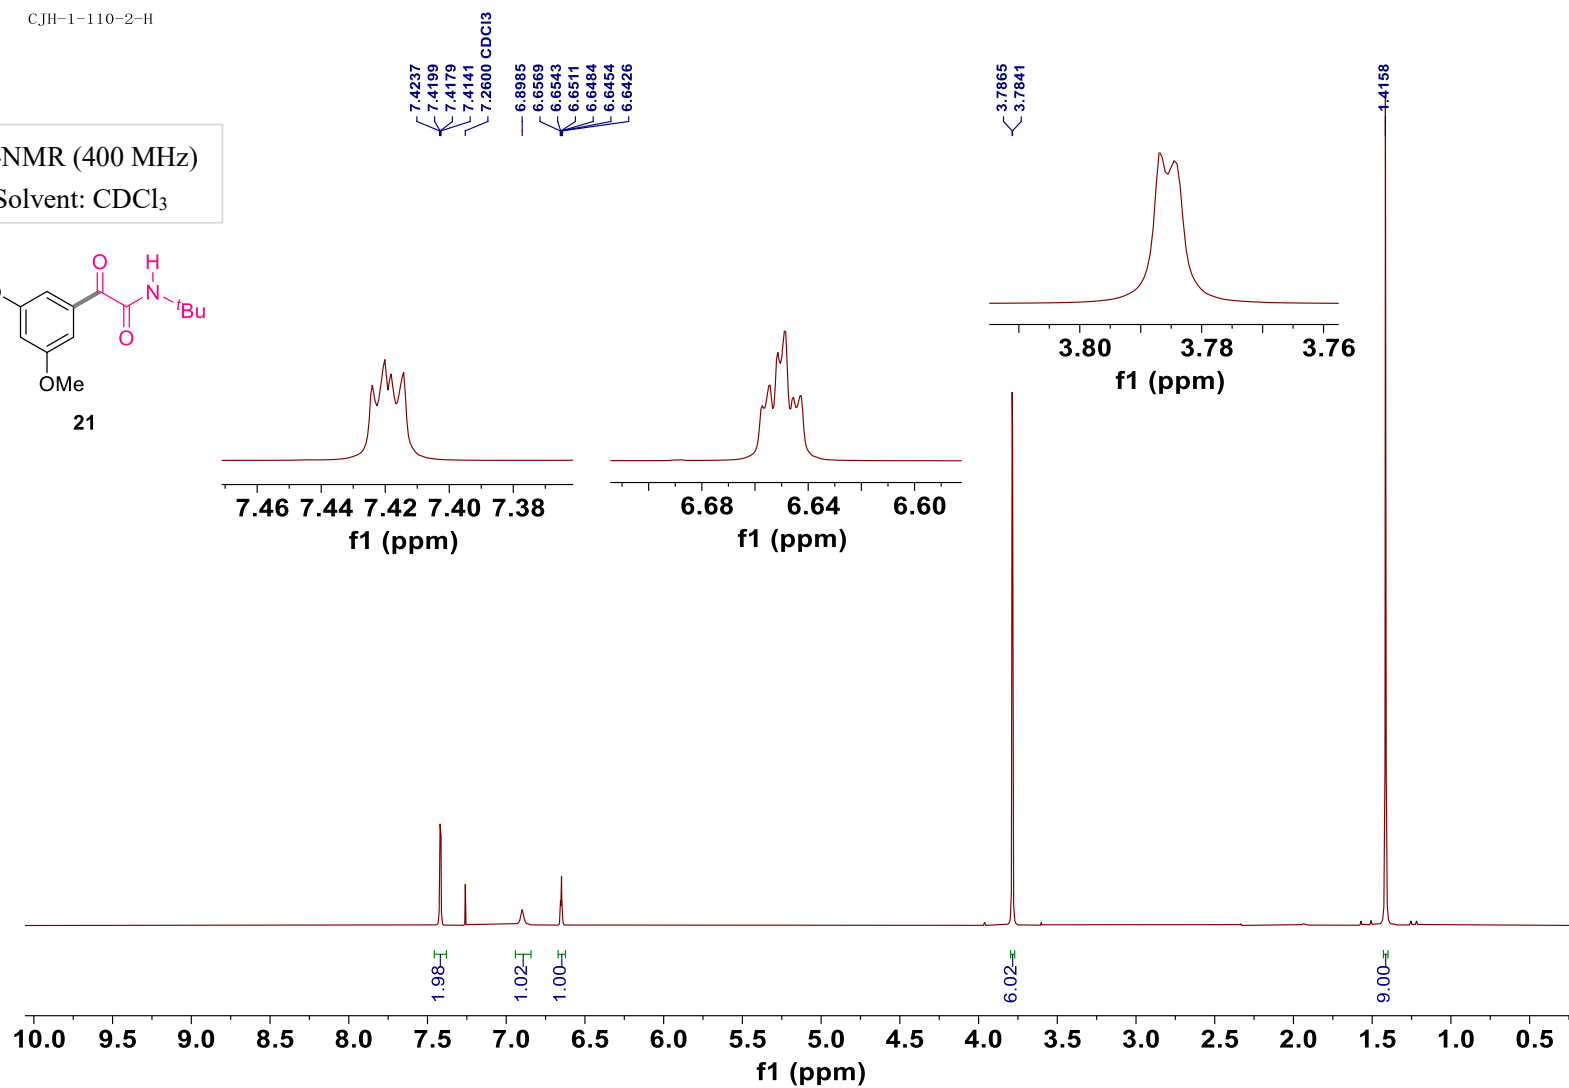

CJH-1-110-2-C

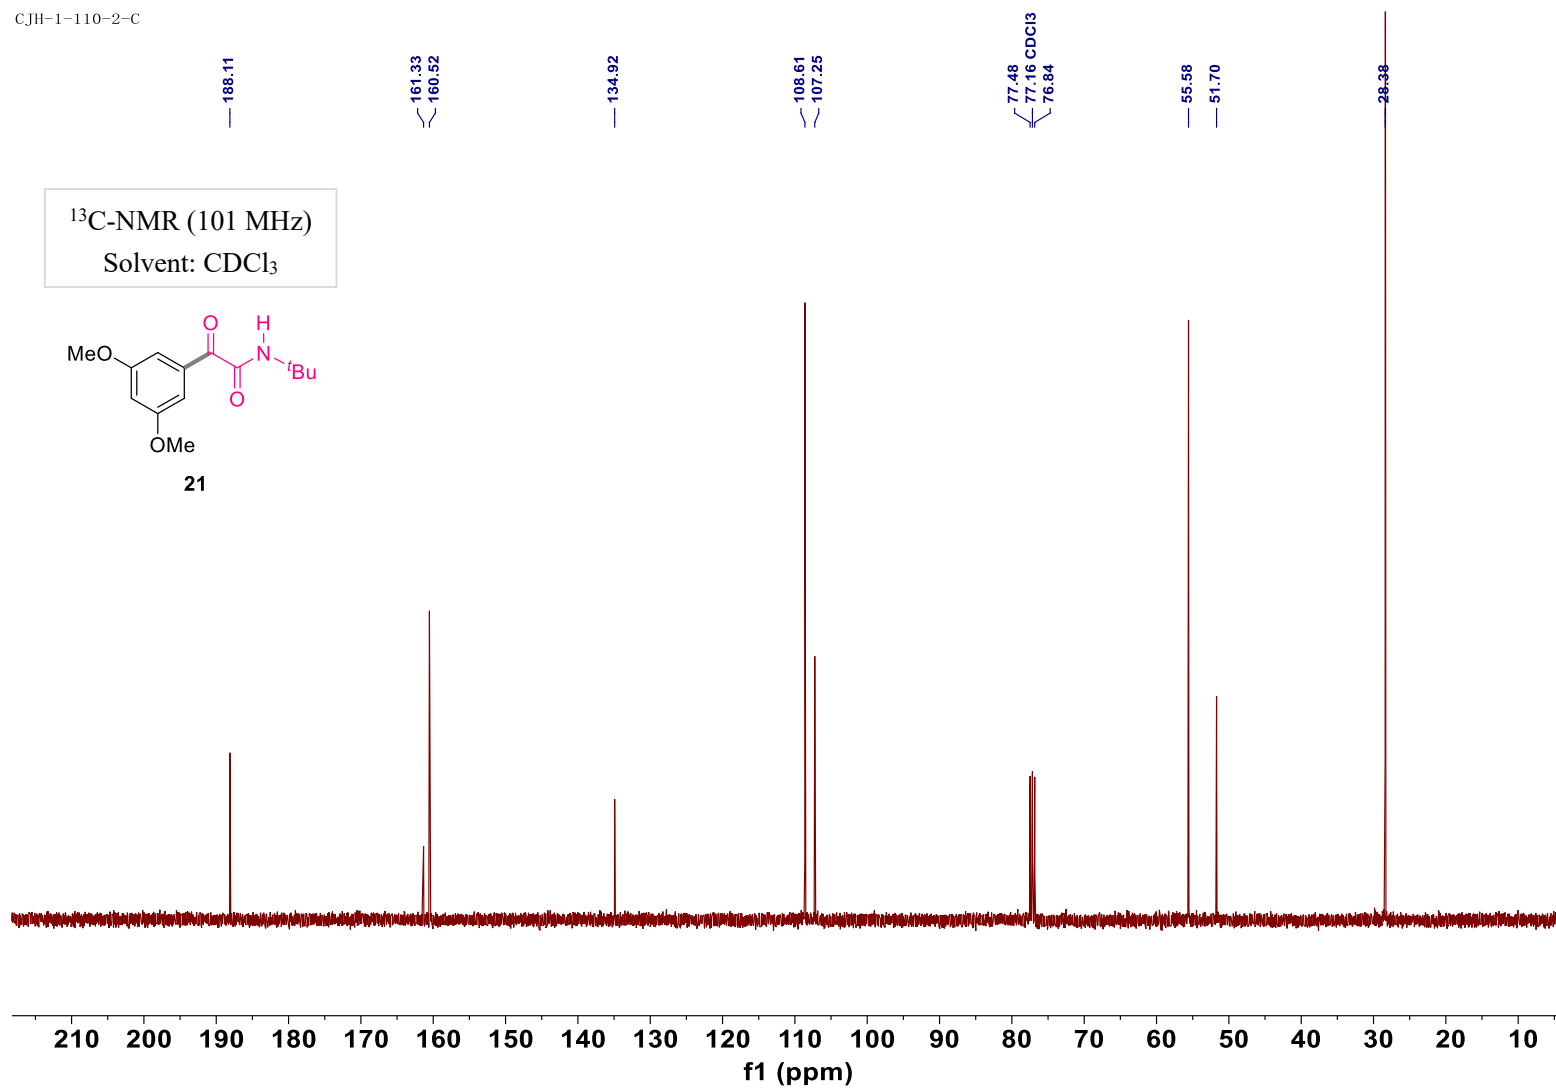

S118

CJH-1-110-1-H

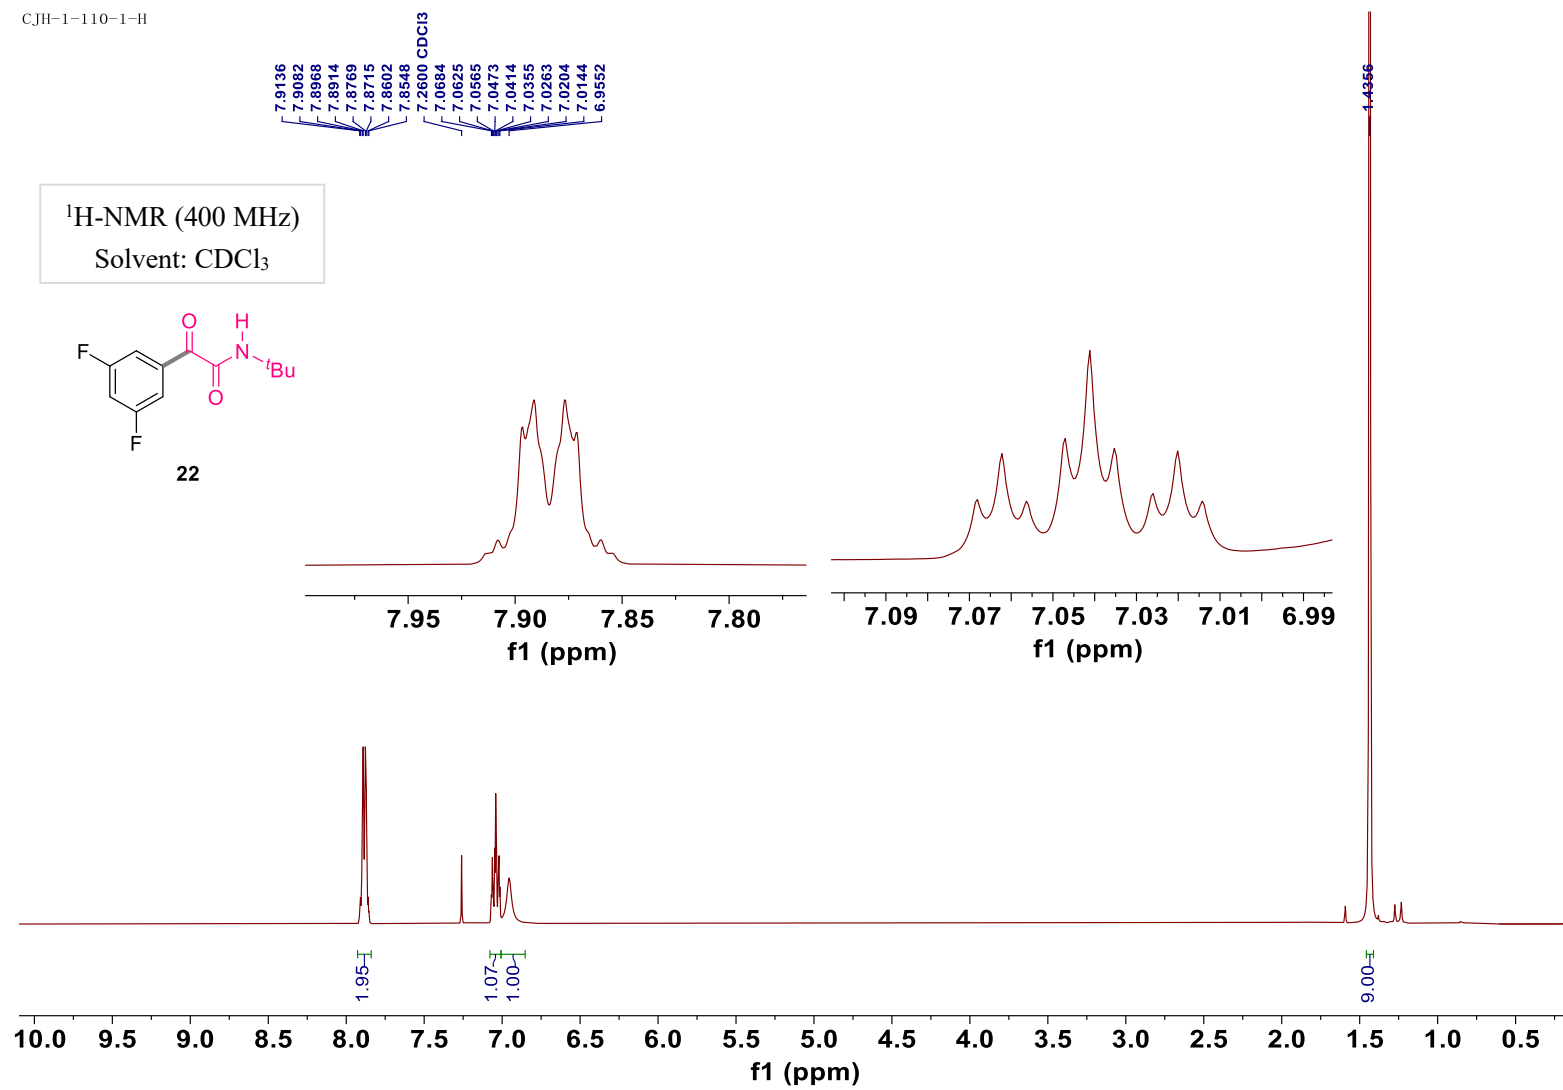

CJH-1-110-1-C

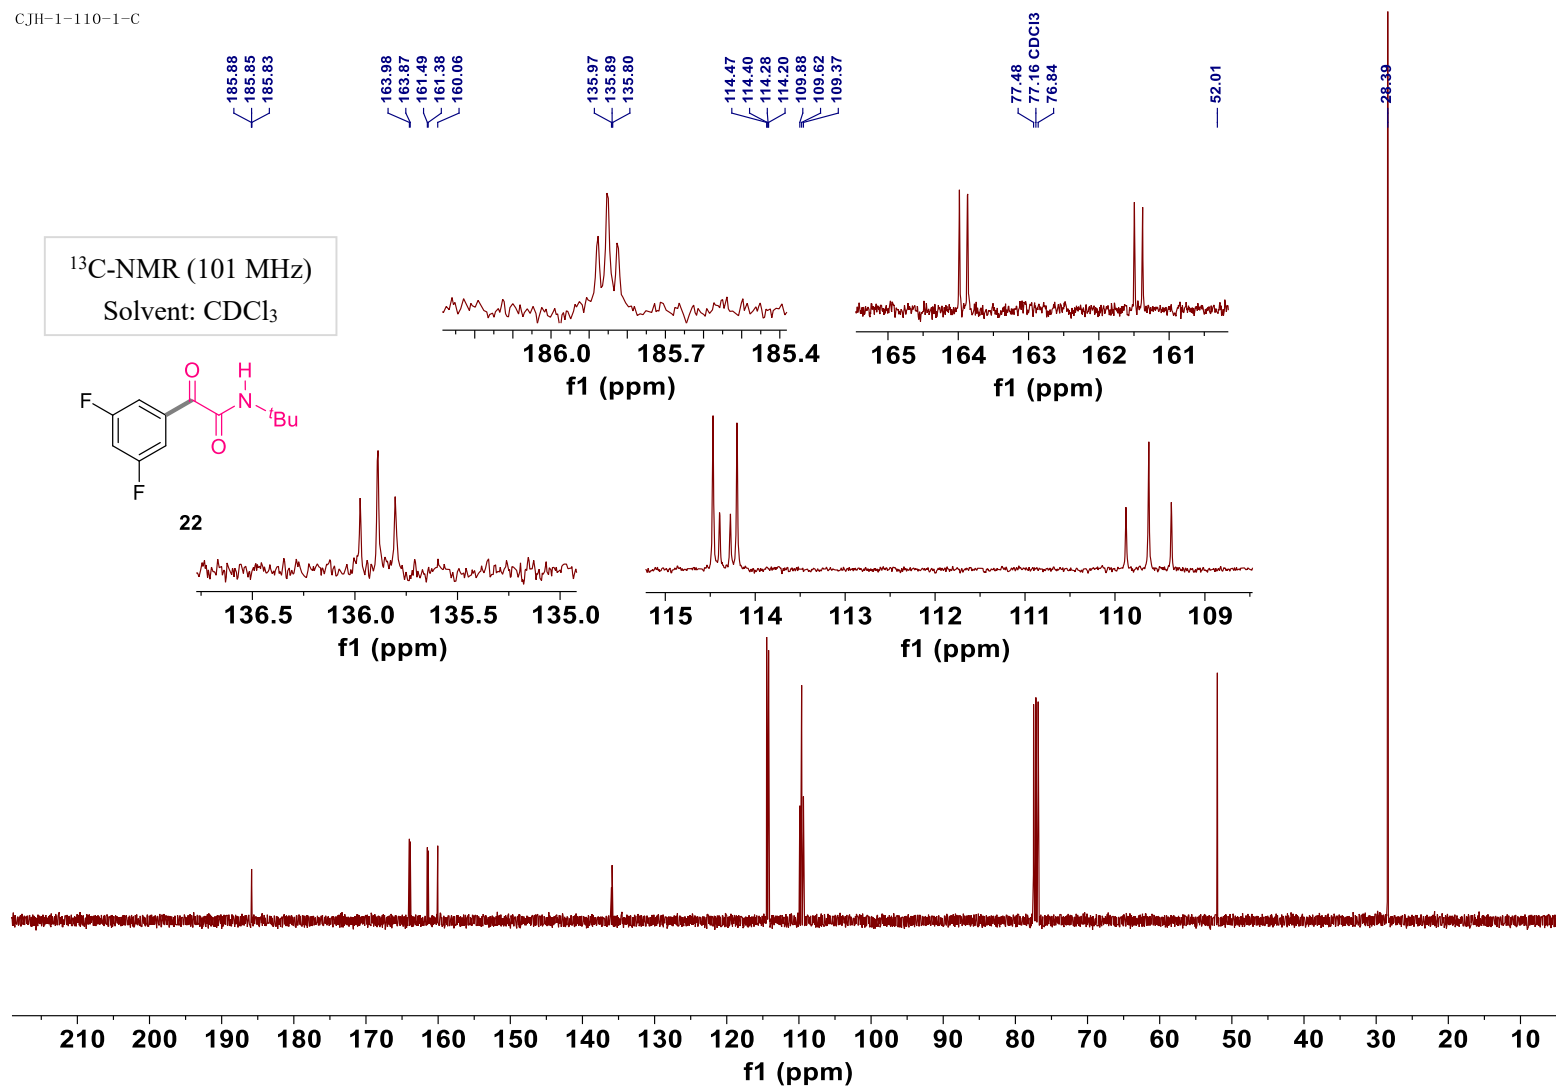

CJH-2-67-1-H

<sup>1</sup>H-NMR (400 MHz)  
Solvent: CDCl<sub>3</sub>

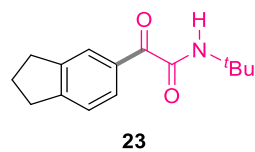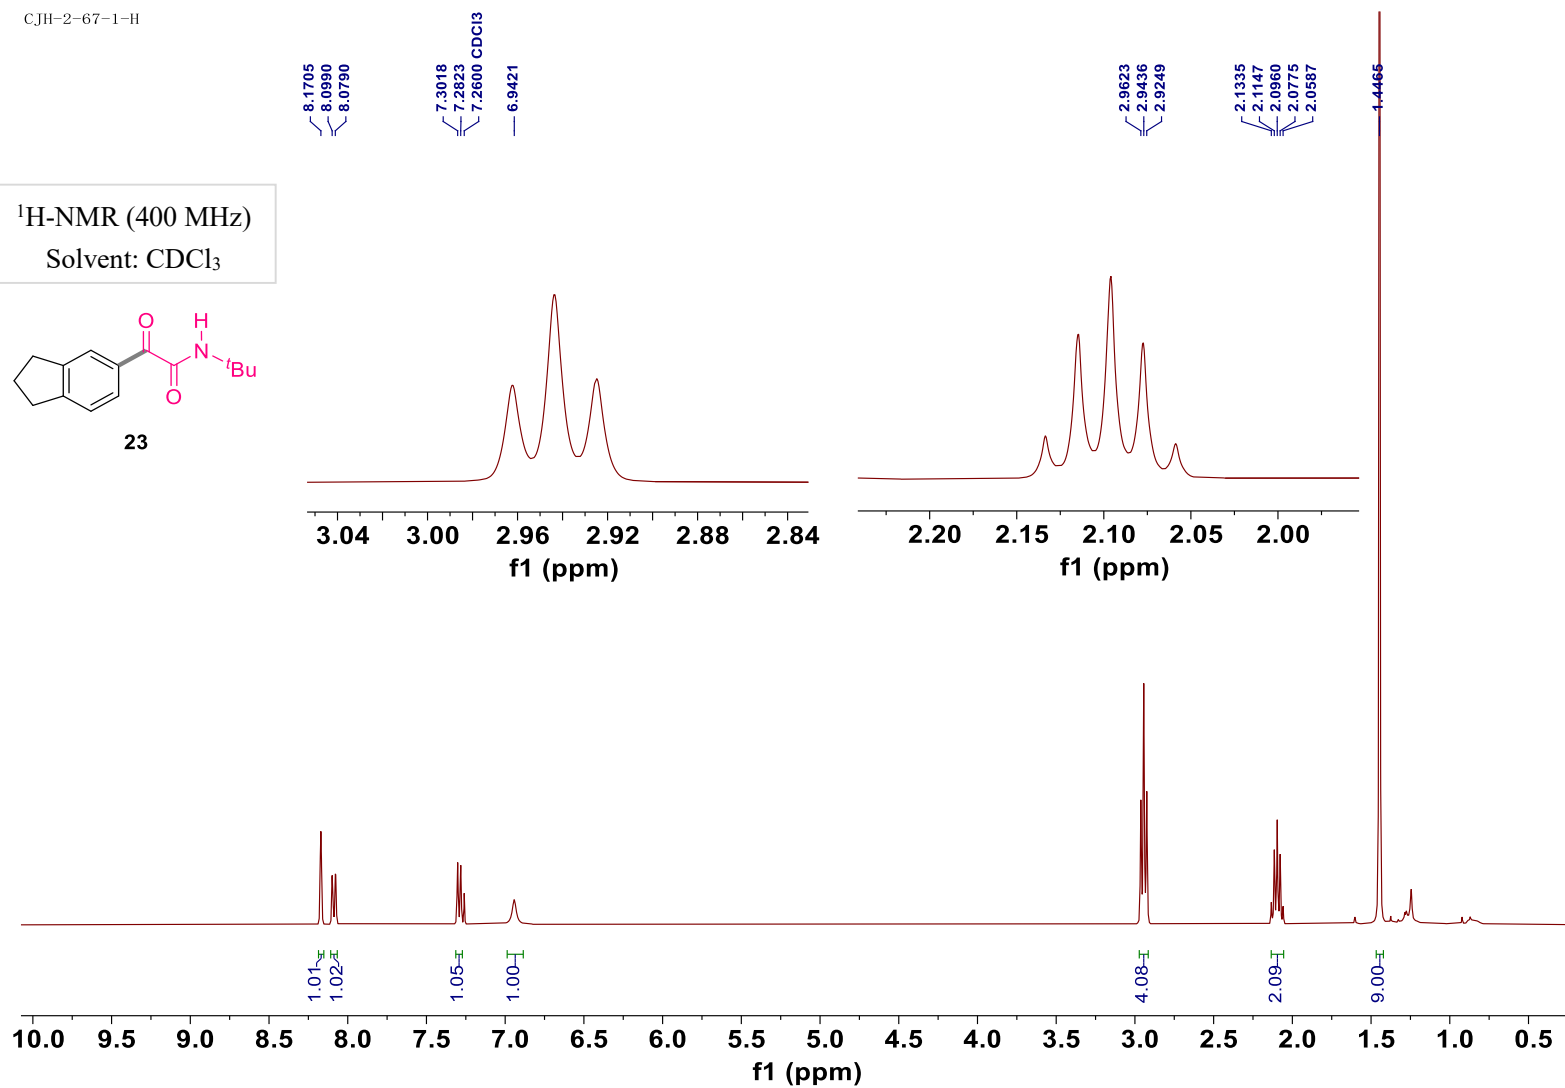



CJH-2-67-1-C

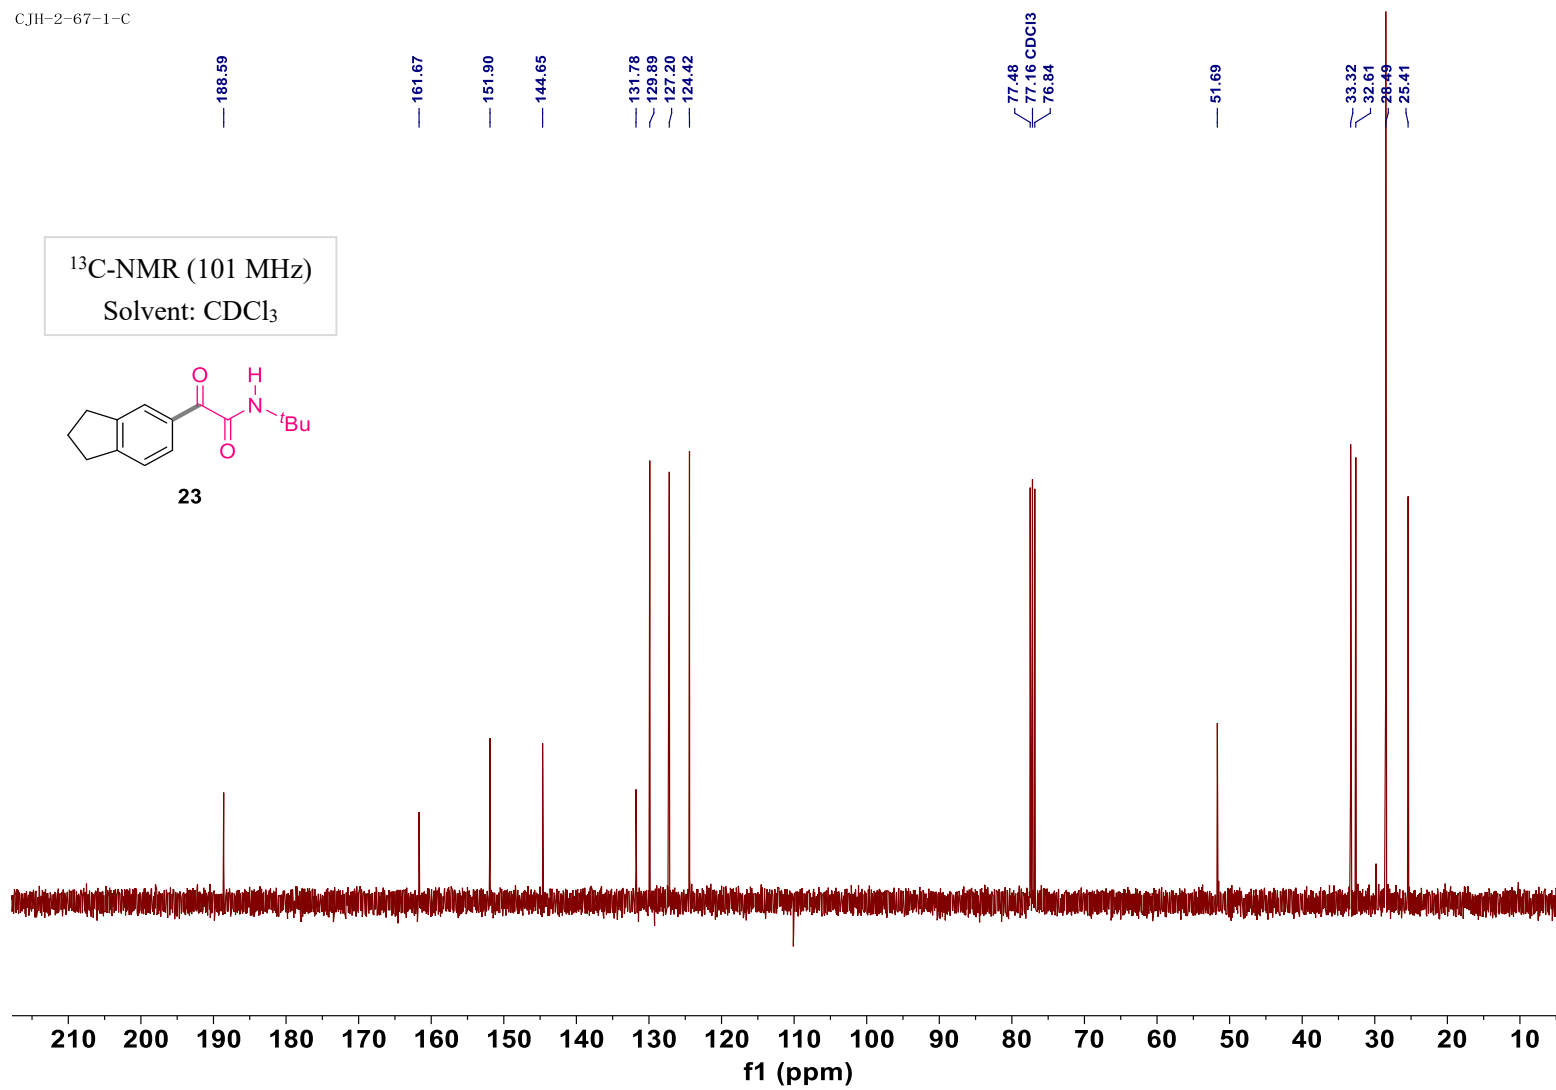

CJH-1-110-3-H

$^1\text{H}$ -NMR (400 MHz)

Solvent:  $\text{CDCl}_3$

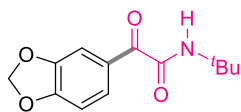

**24**

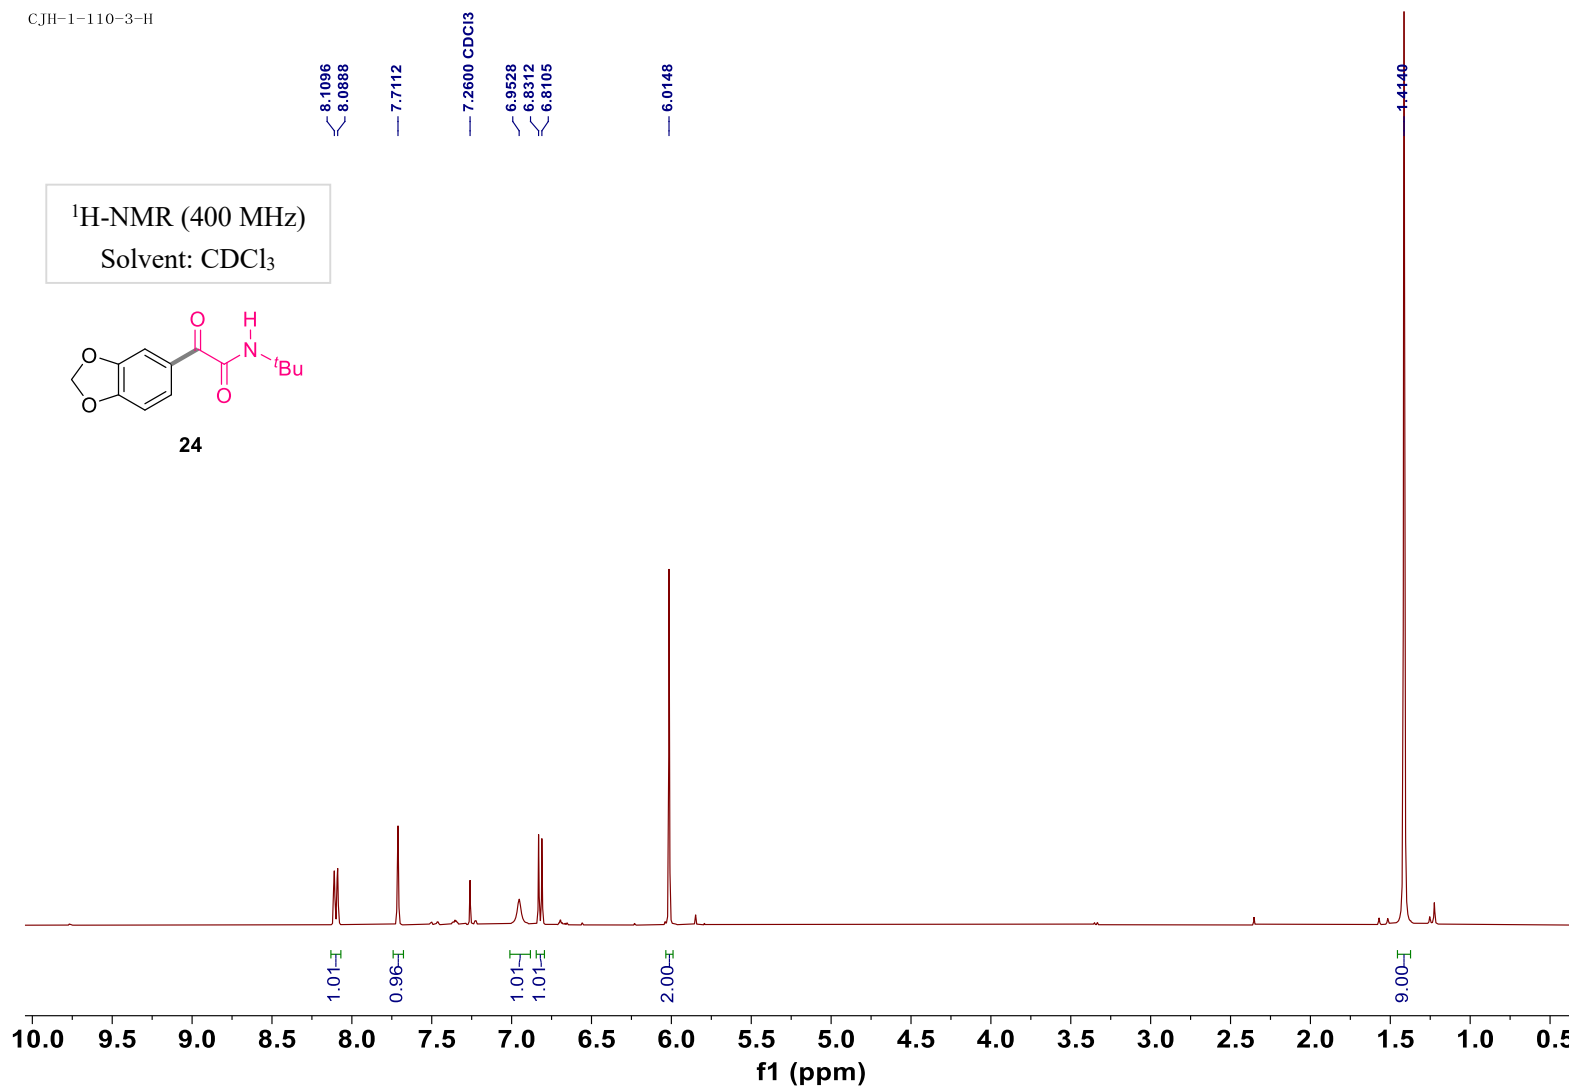

S123

CJH-1-110-3-C

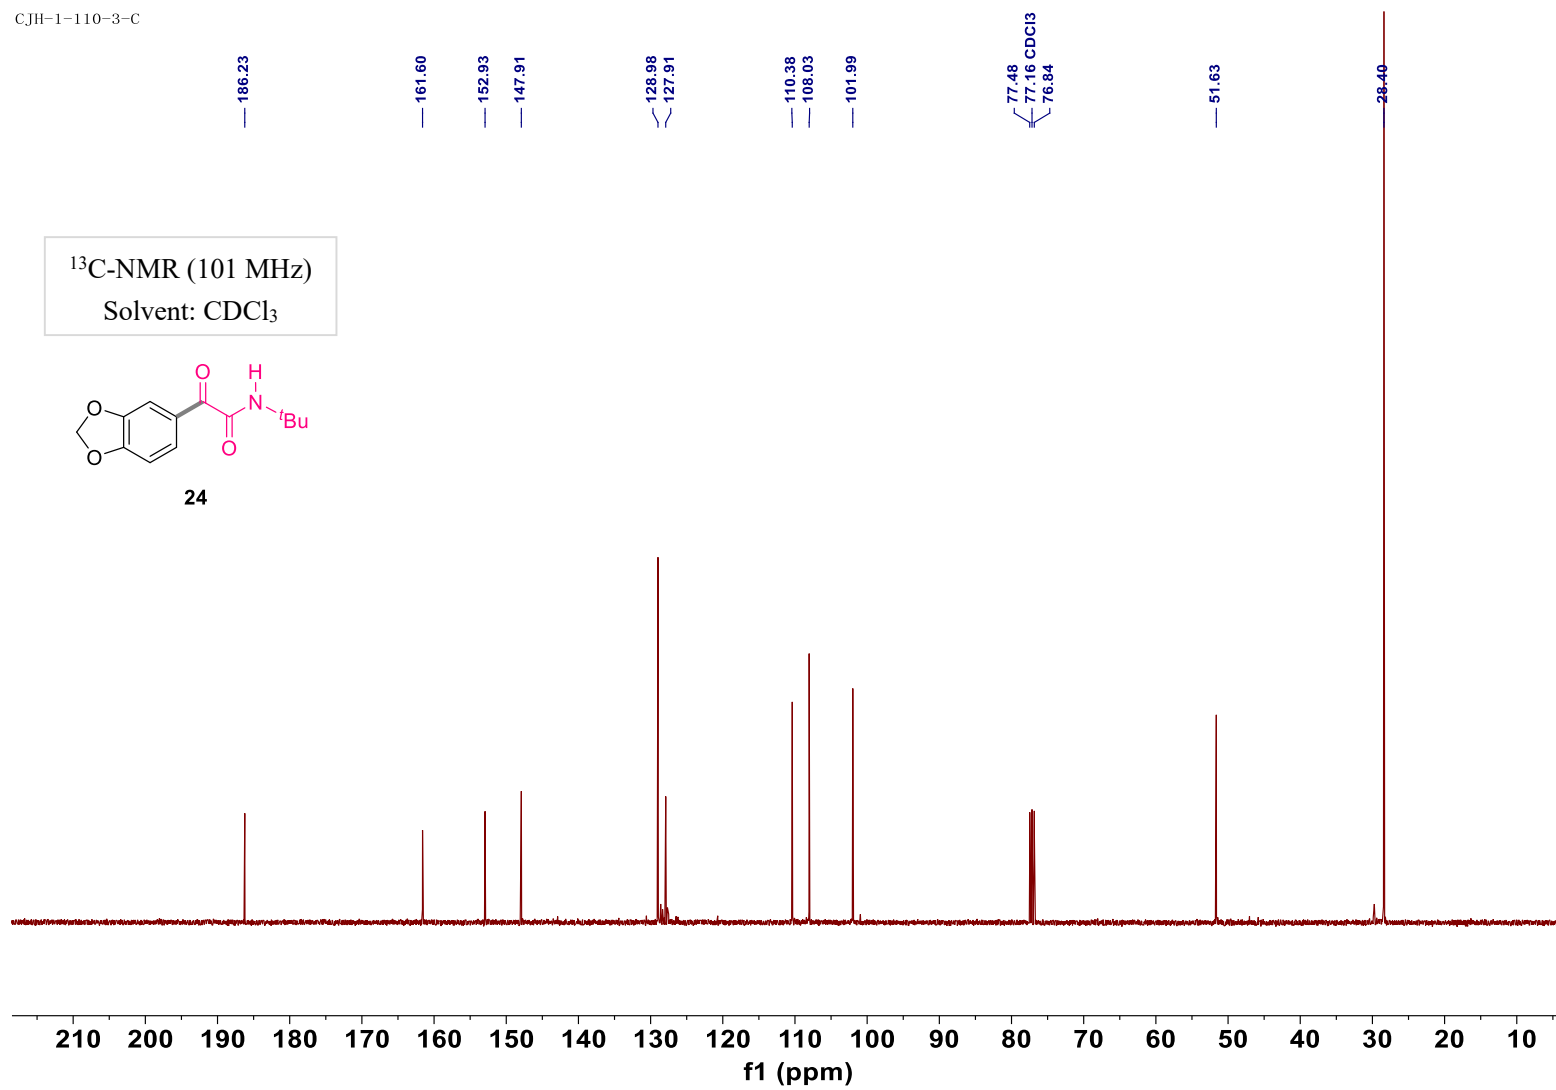

CJH-2-64-1-H

<sup>1</sup>H-NMR (400 MHz)  
Solvent: CDCl<sub>3</sub>

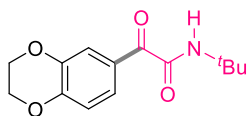

25

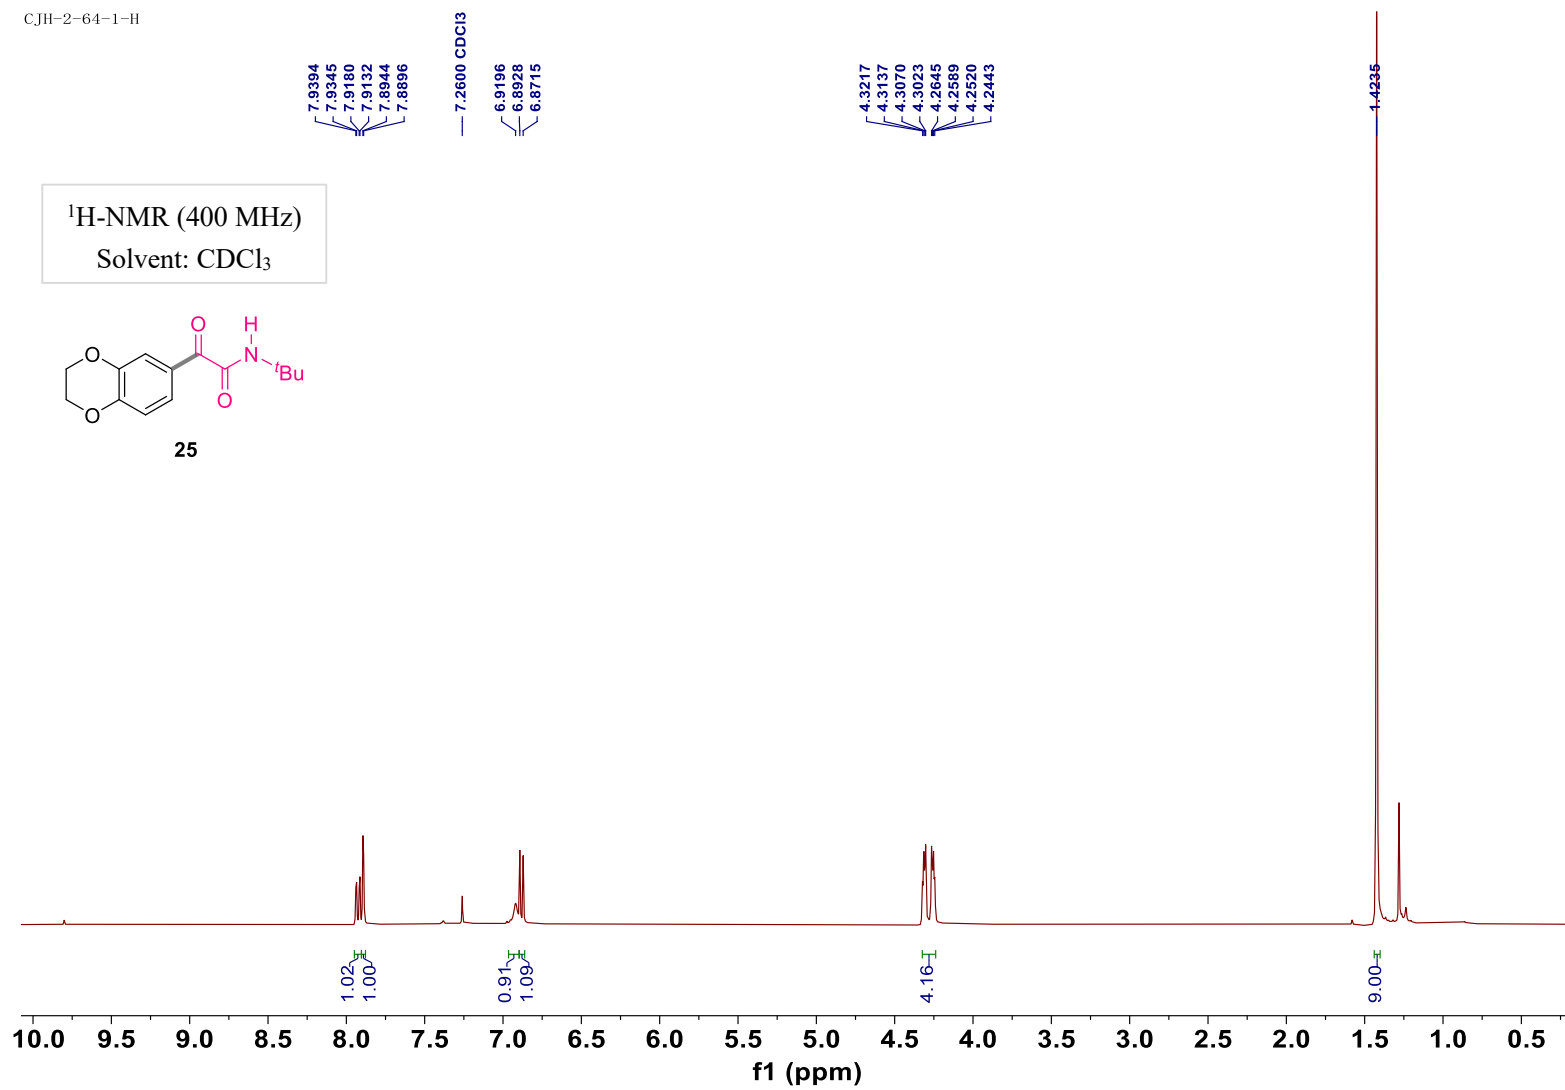

S125

CJH-2-64-1-C

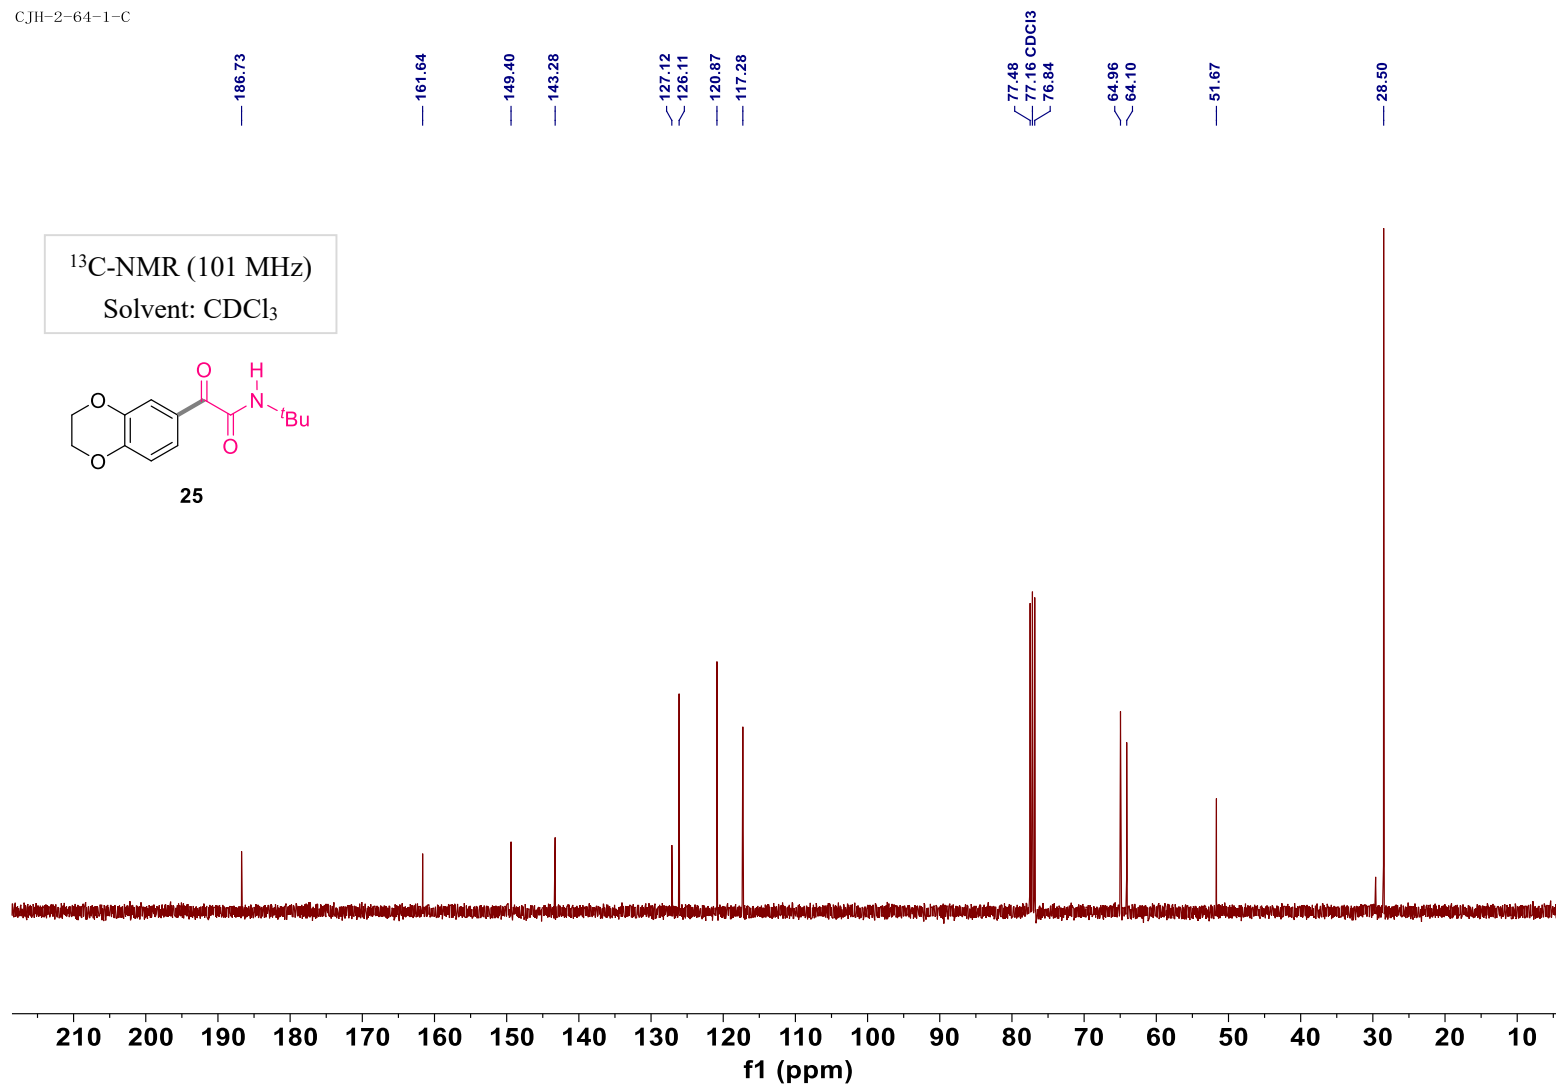

S126

CJH-2-63-1-H

<sup>1</sup>H-NMR (400 MHz)  
Solvent: CDCl<sub>3</sub>

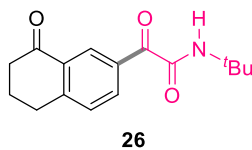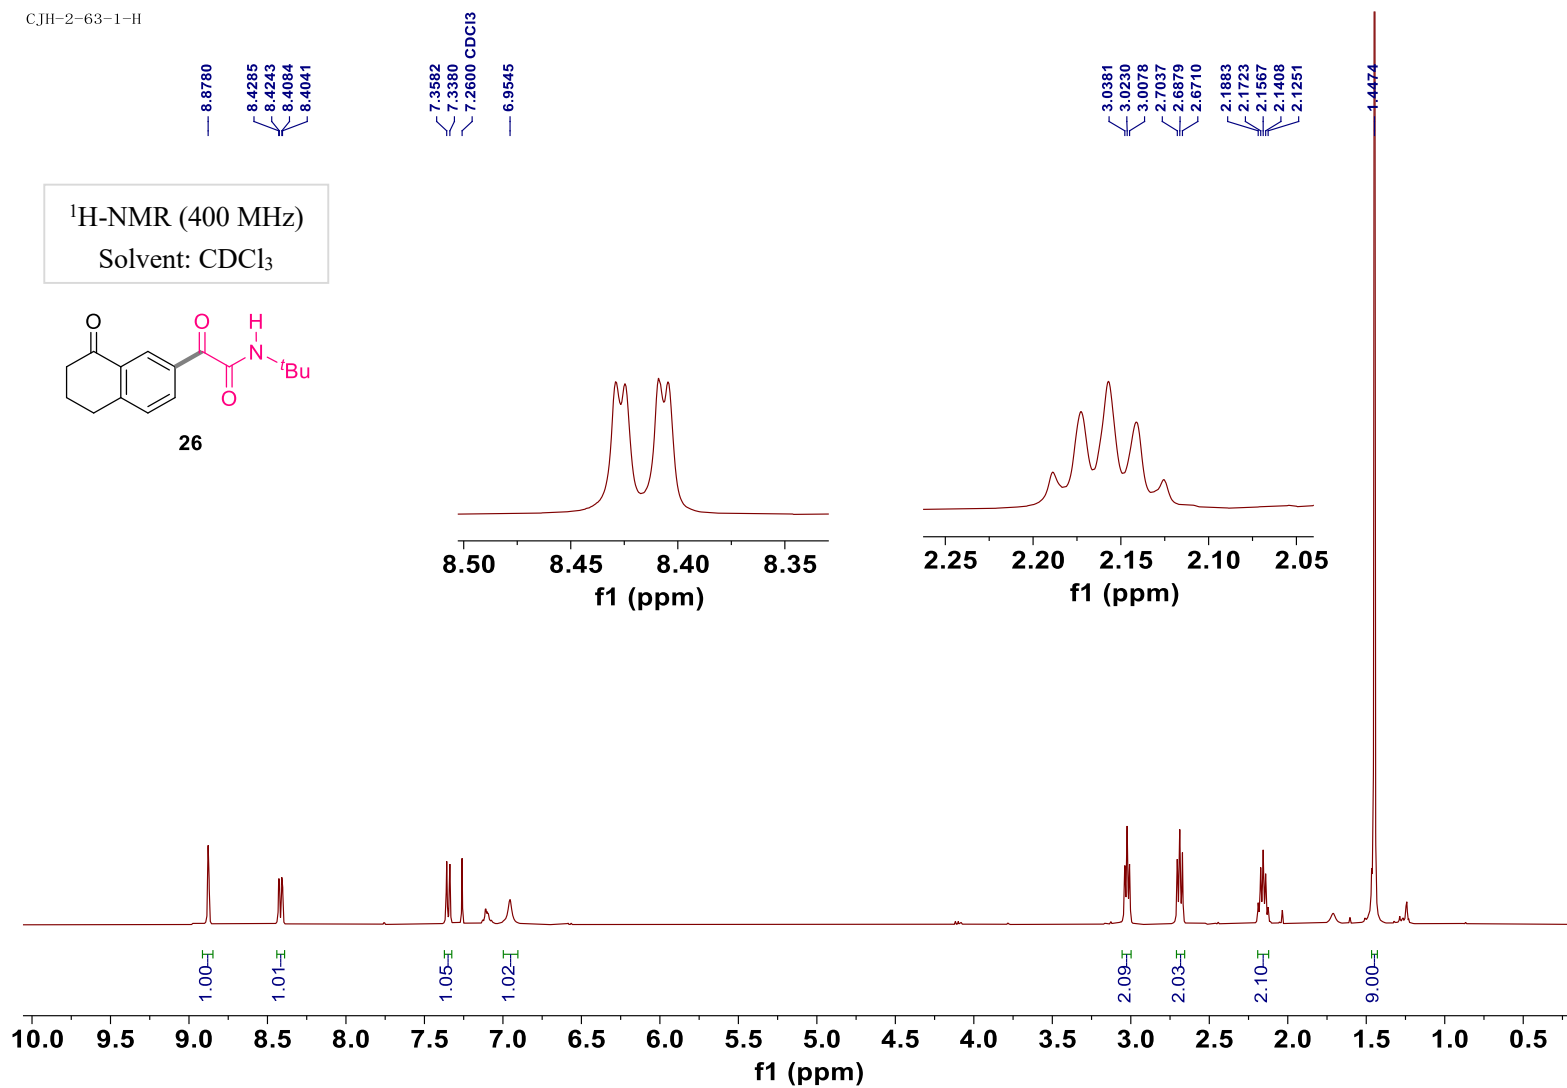

CJH-2-63-1-C

— 197.31

— 187.74

— 160.74

— 150.45

— 135.38

— 132.72

— 132.25

— 130.57

— 129.20

— 77.48  
— 77.16 CDCl<sub>3</sub>  
— 76.84

— 51.85

— 39.08

— 30.12

— 28.47

— 22.84

<sup>13</sup>C-NMR (101 MHz)

Solvent: CDCl<sub>3</sub>

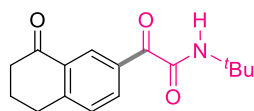

**26**

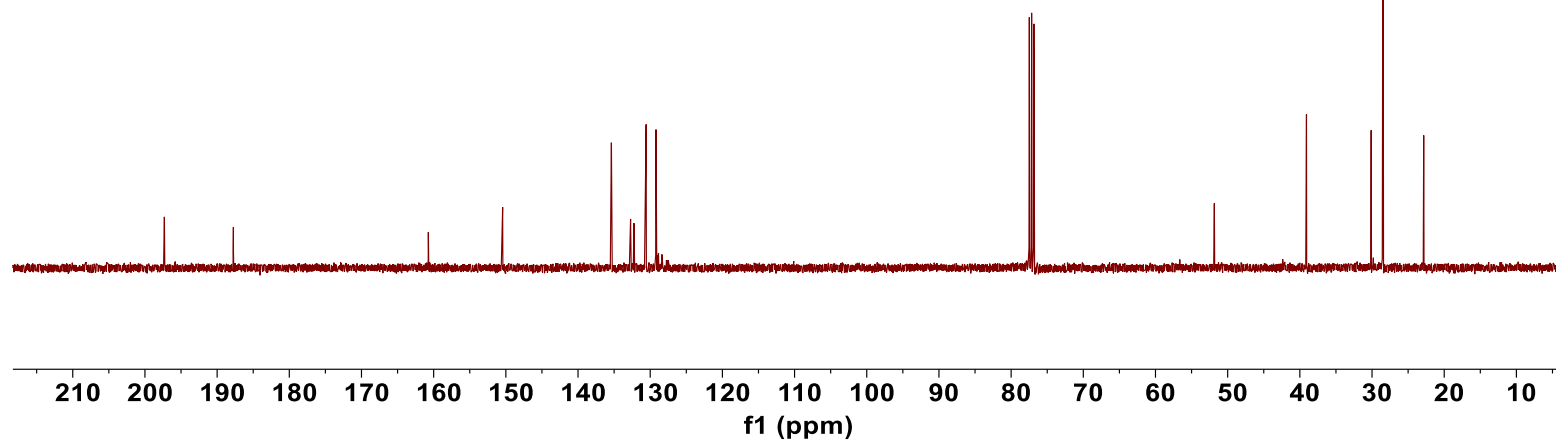

S128

CJH-2-64-2-H

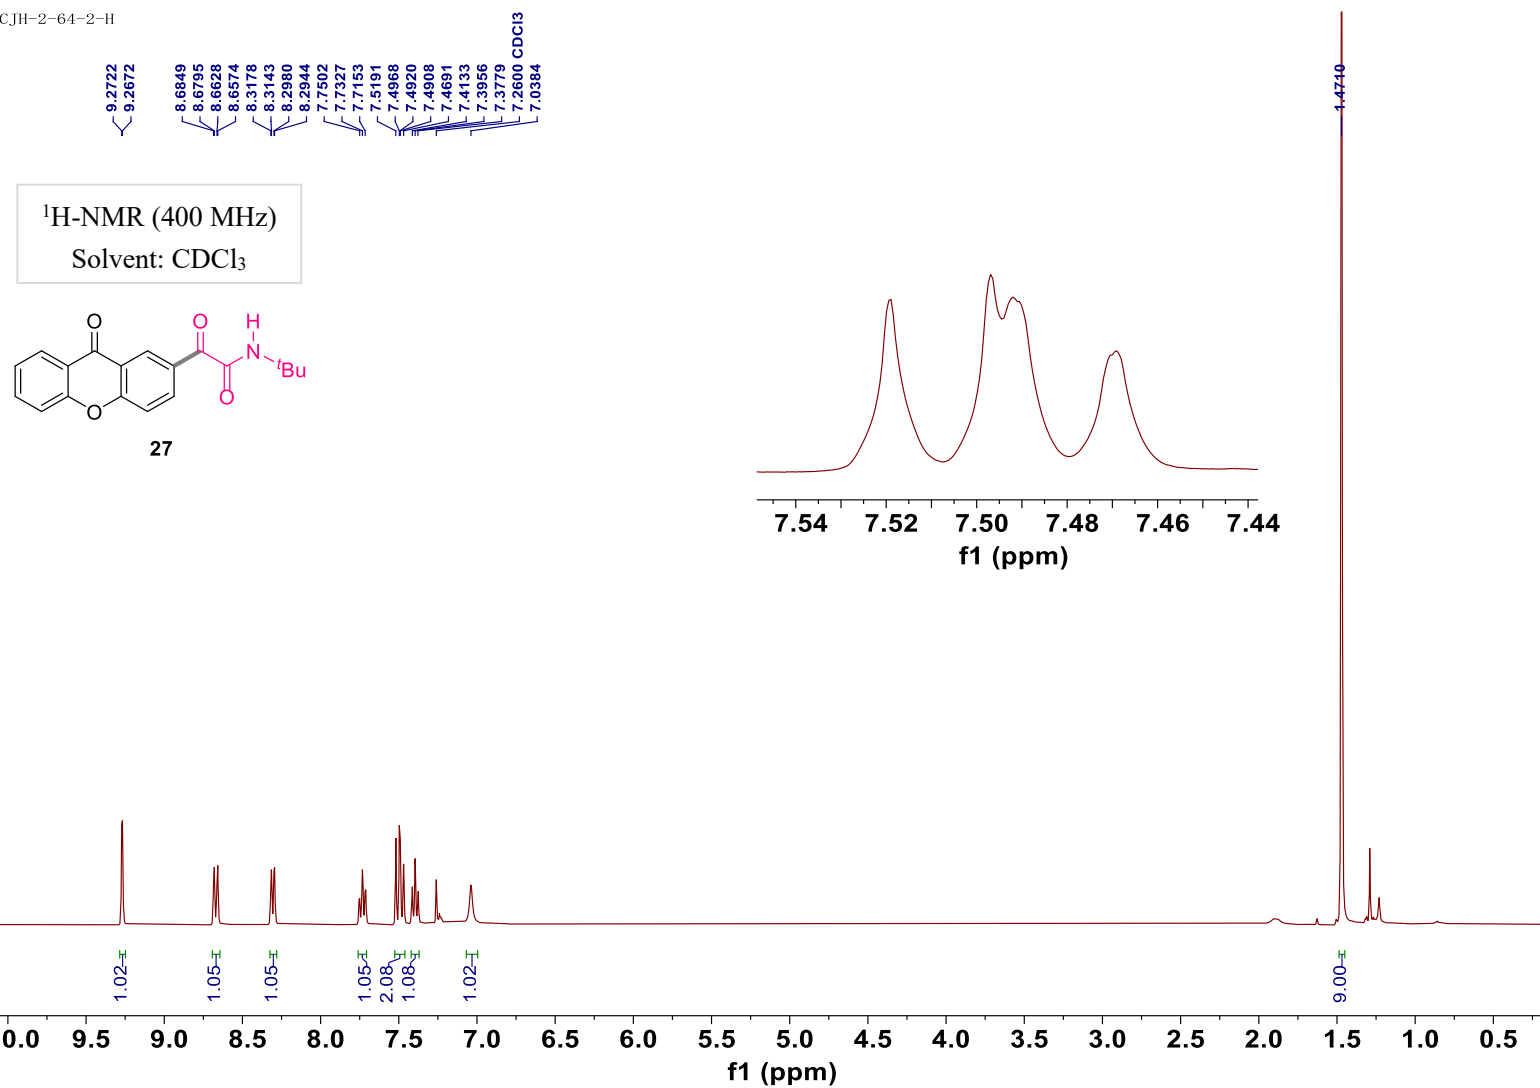



CJH-2-64-2-C

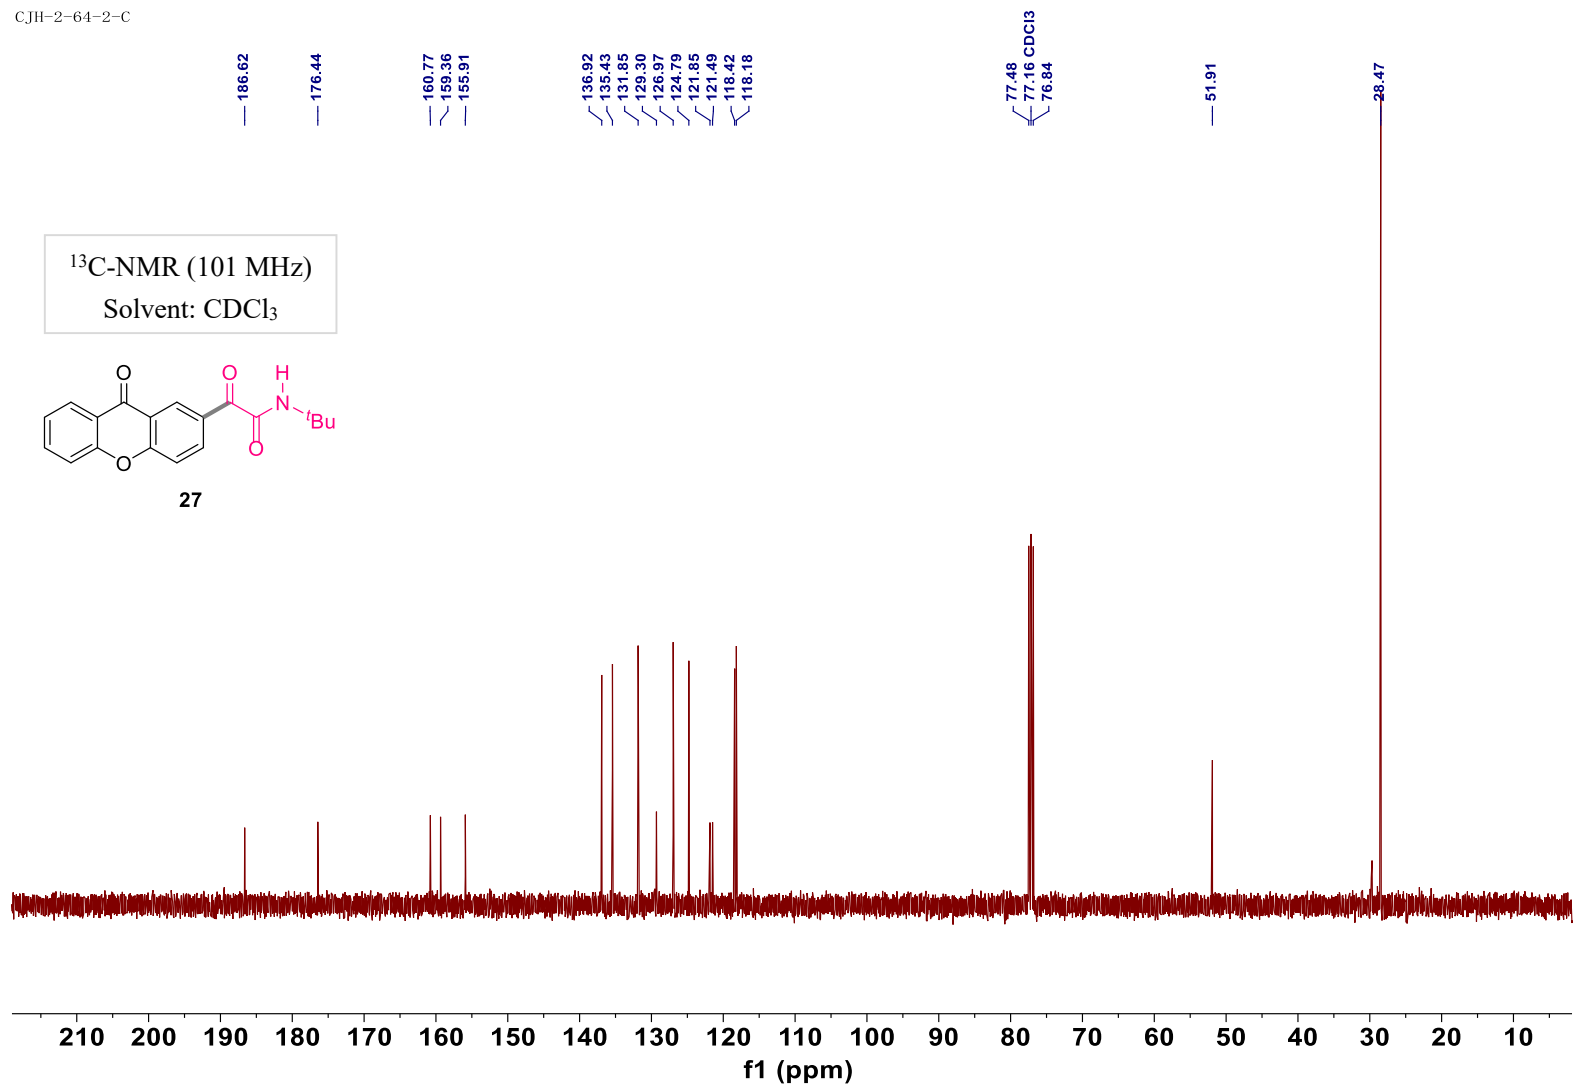

S130

CJH-2-62-3-H

<sup>1</sup>H-NMR (400 MHz)  
Solvent: CDCl<sub>3</sub>

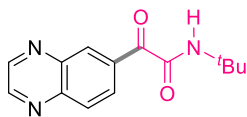

28

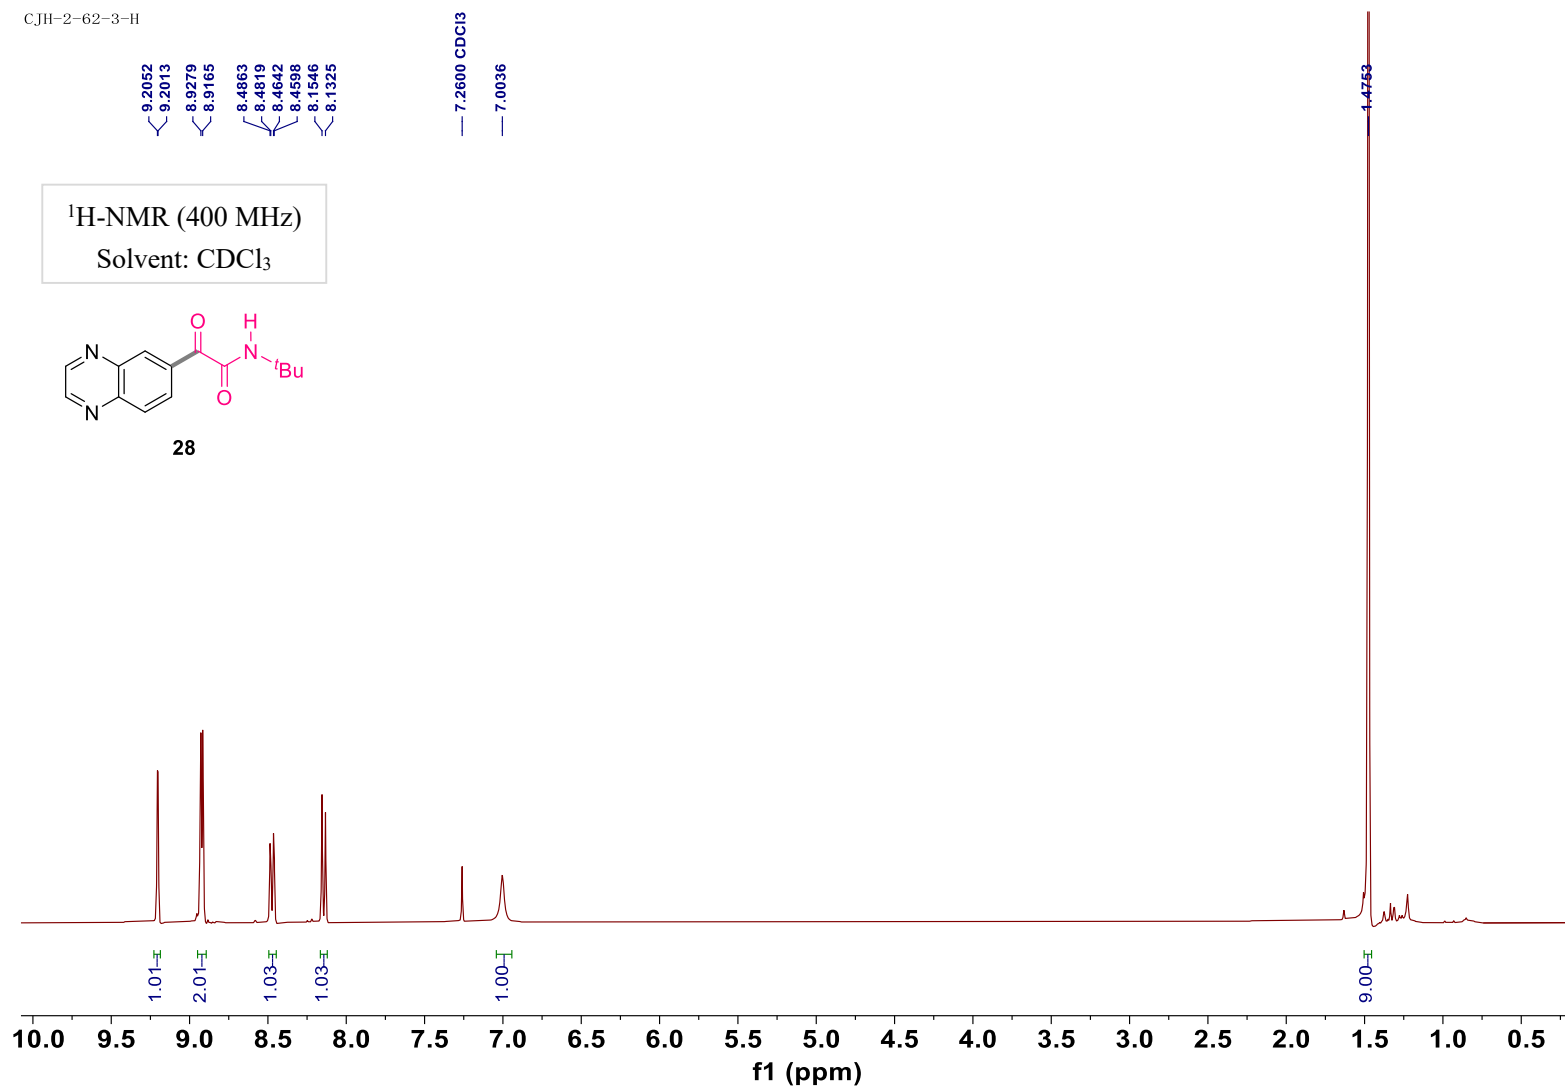

S131

CJH-2-62-3-C

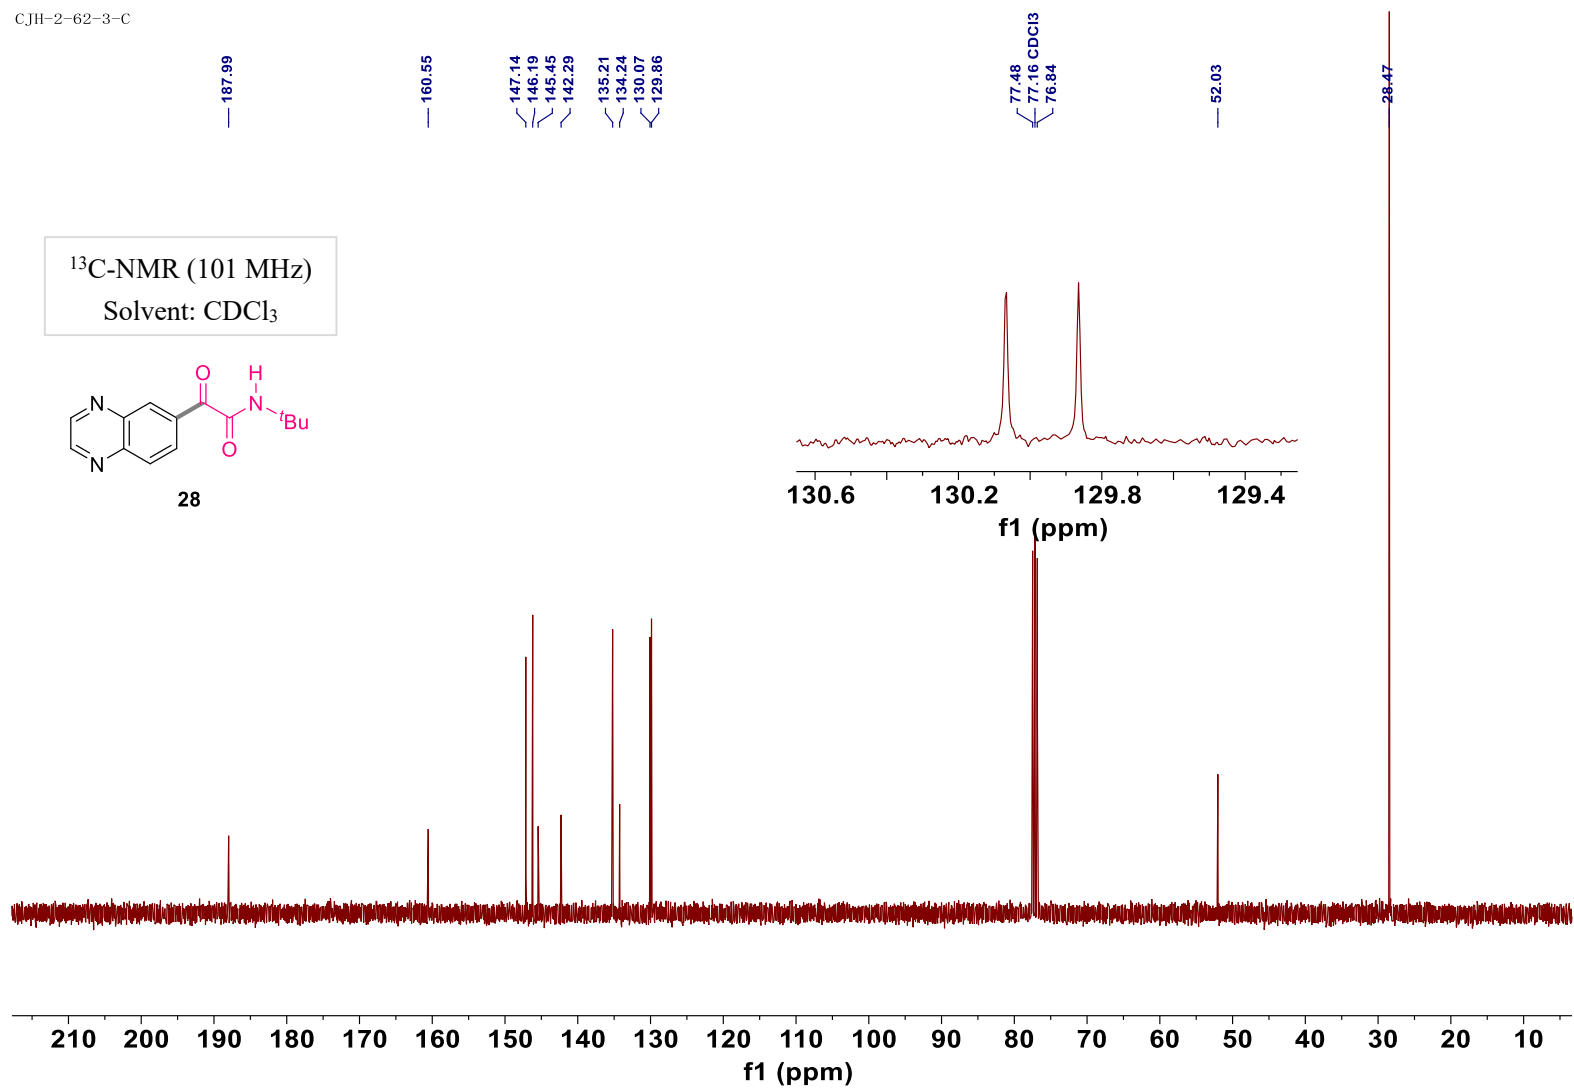

CJH-1-114-2-H

<sup>1</sup>H-NMR (400 MHz)  
Solvent: CDCl<sub>3</sub>

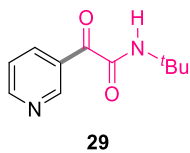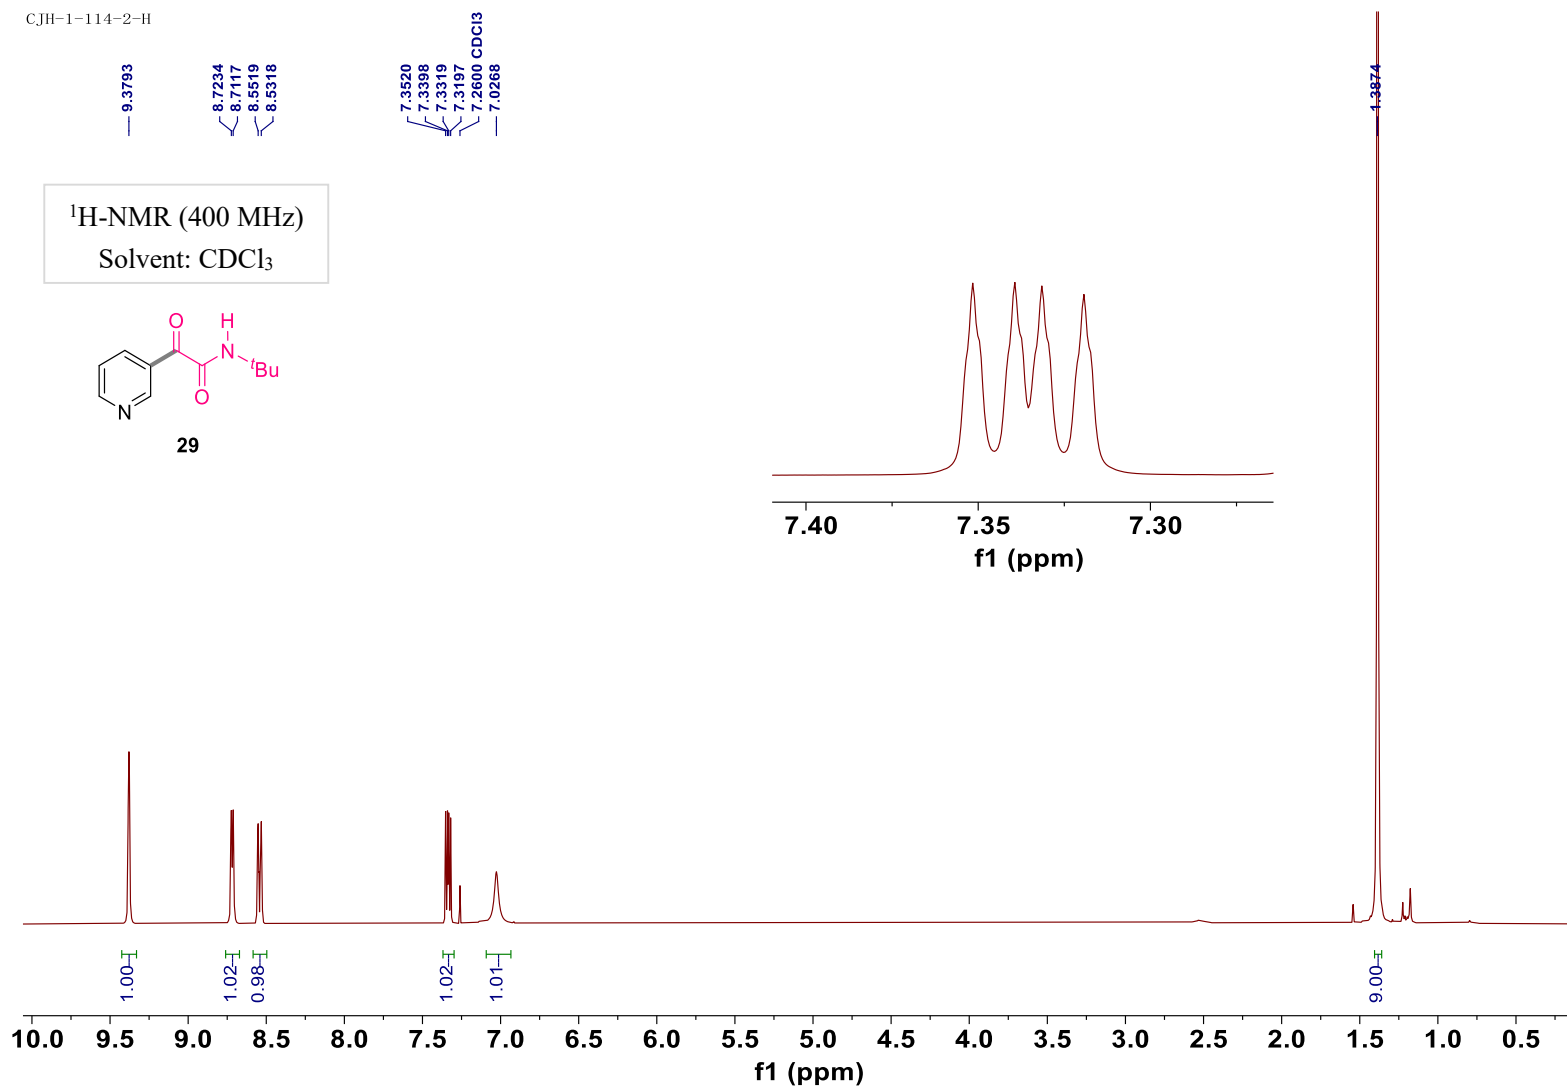

CJH-1-114-2-C

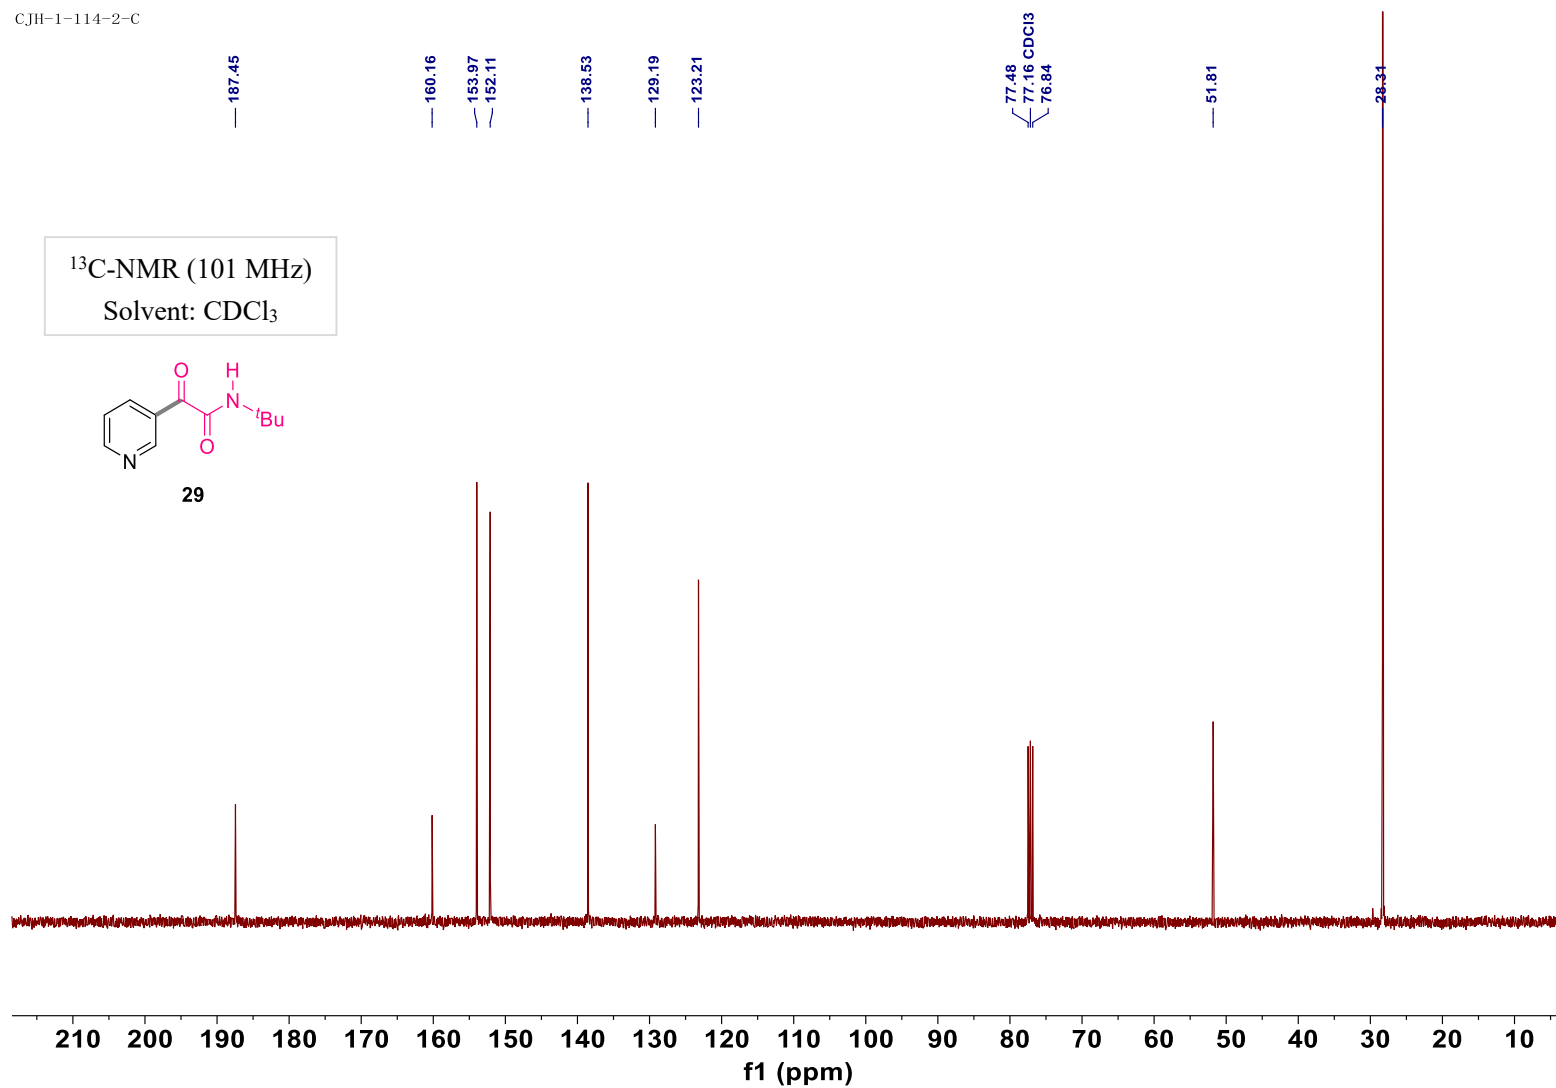

S134

CJH-1-114-3-H

9.2572

8.4822  
8.4602

7.2600 CDCl<sub>3</sub>

6.9957

6.7595  
6.7375

3.9937

1.4212

<sup>1</sup>H-NMR (400 MHz)  
Solvent: CDCl<sub>3</sub>

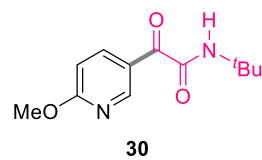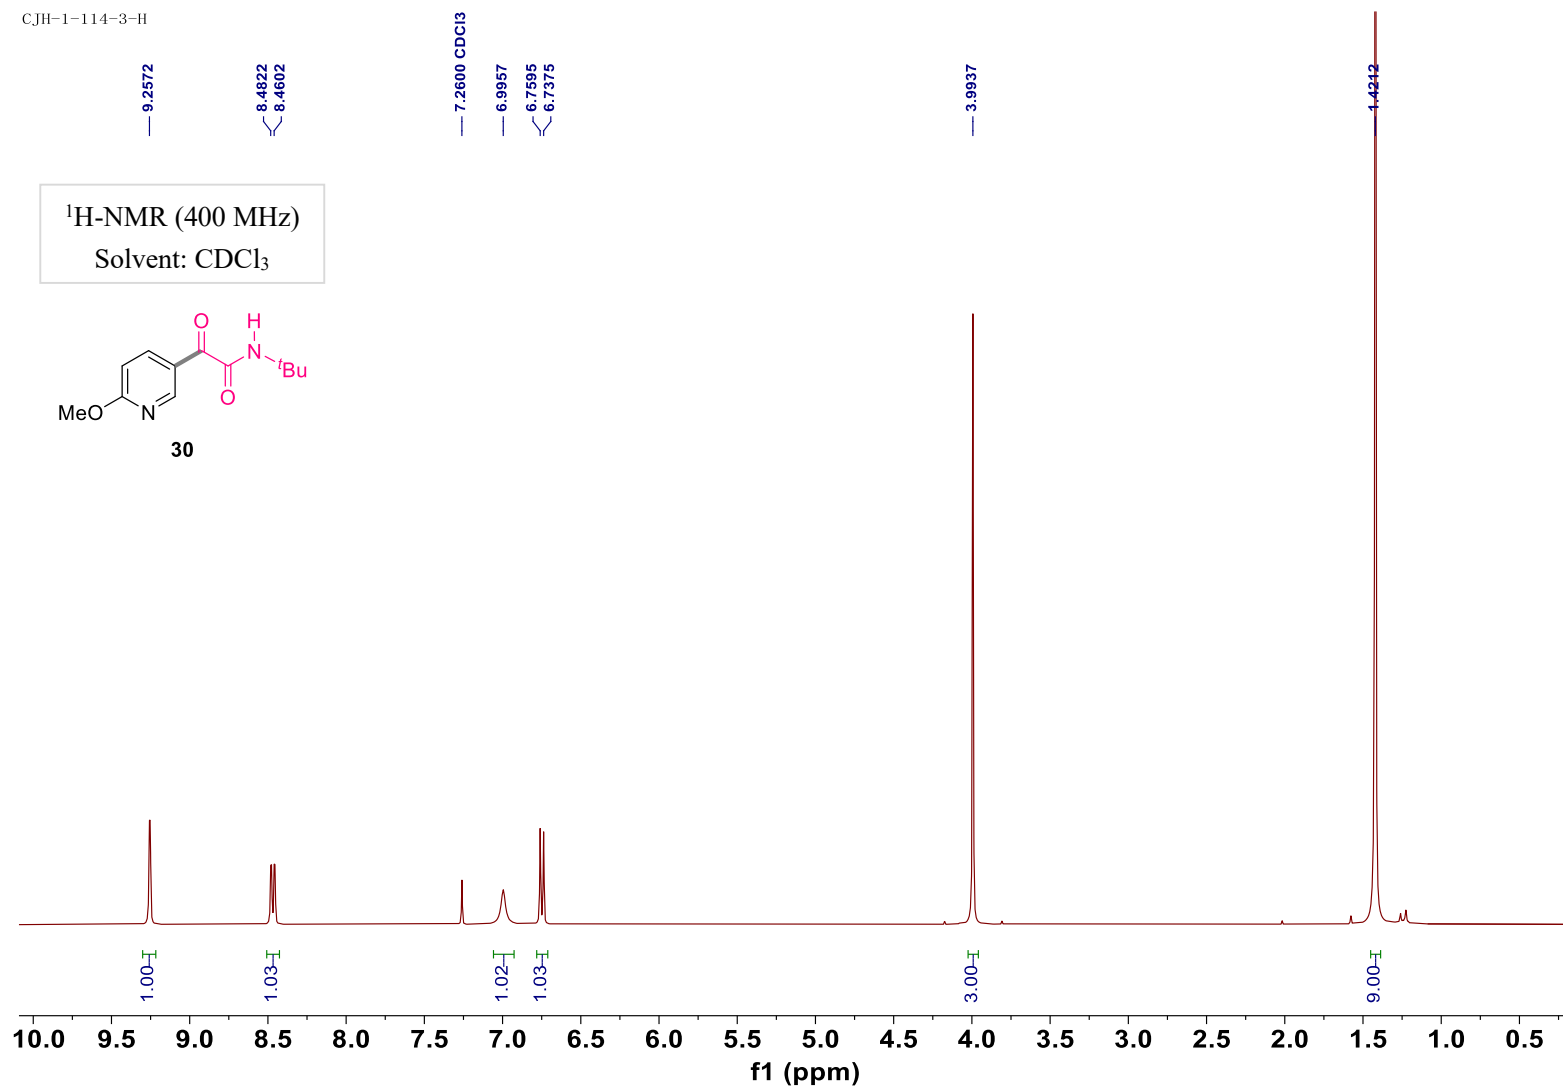

S135

CJH-1-114-3-C

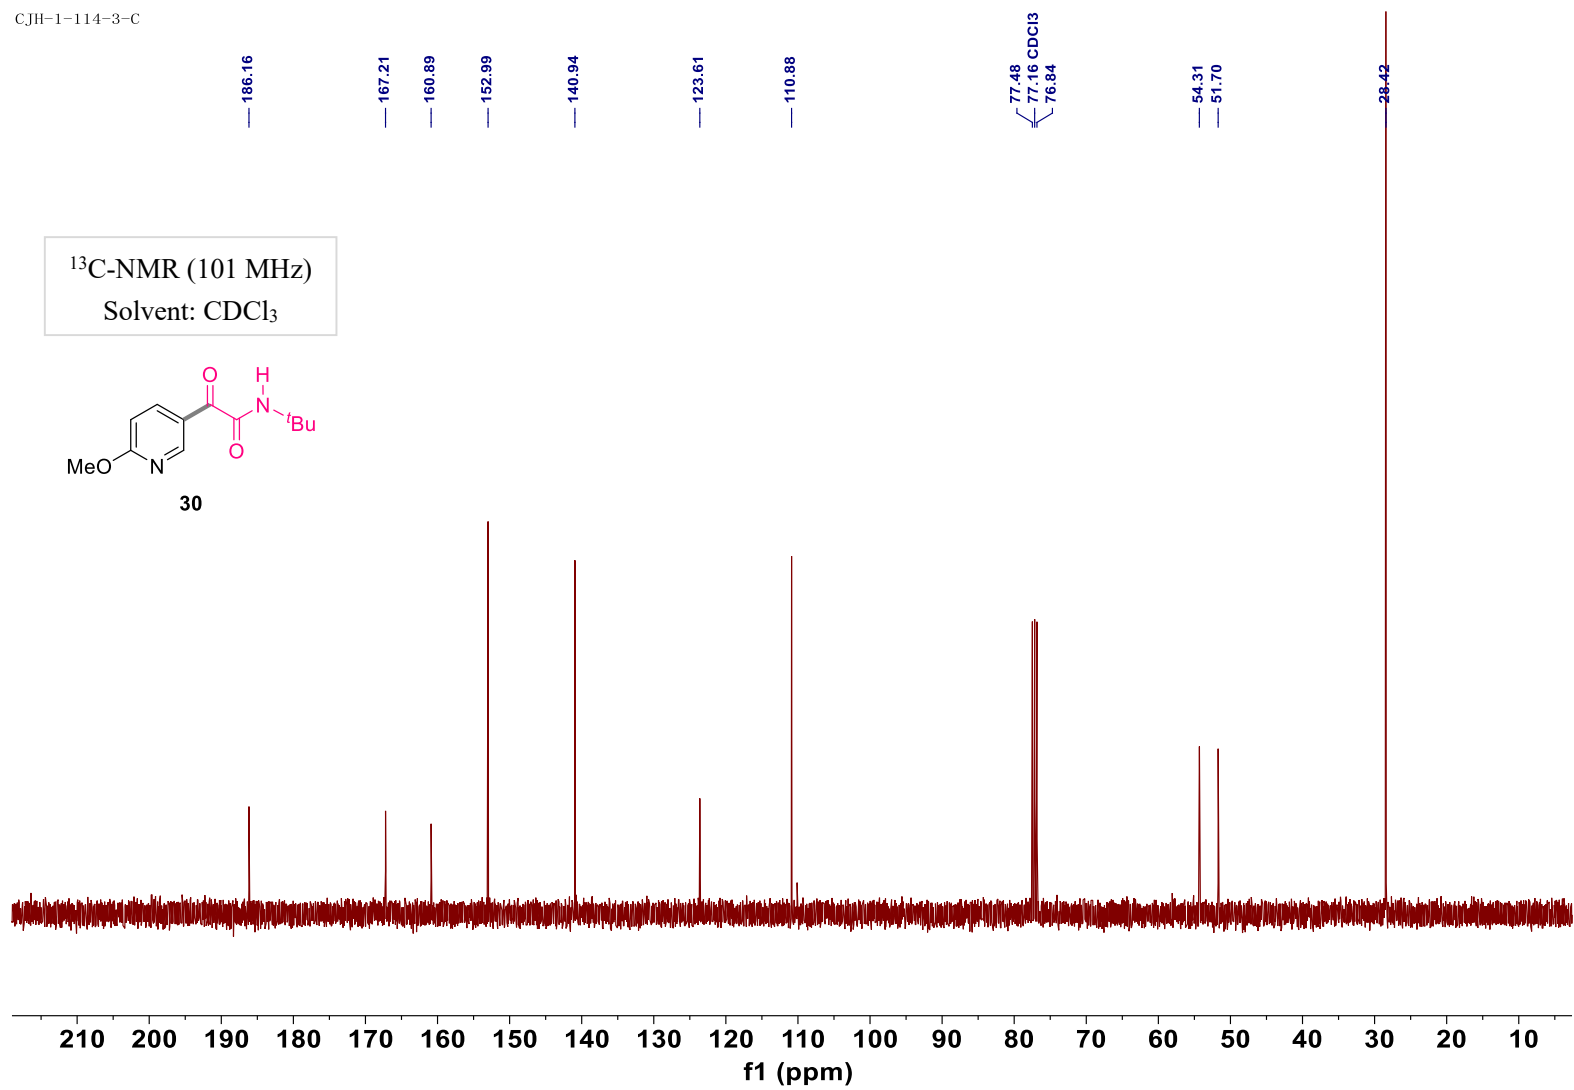

CJH-2-67-3-H

9.3699  
9.3664

8.4152  
8.4098  
8.3937  
8.3884

7.2600 CDCl<sub>3</sub>  
7.2364  
7.2149  
6.9987

2.6026

1.4368

<sup>1</sup>H-NMR (400 MHz)  
Solvent: CDCl<sub>3</sub>

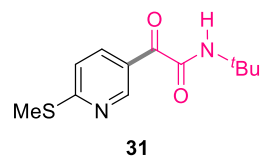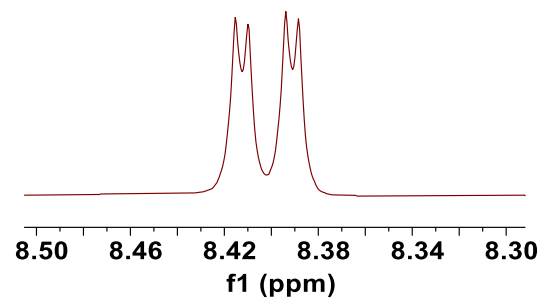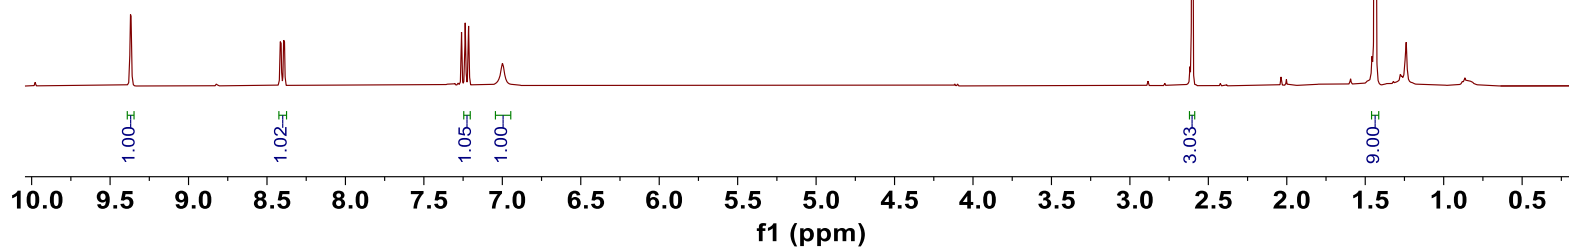

S137



CJH-2-67-3-C

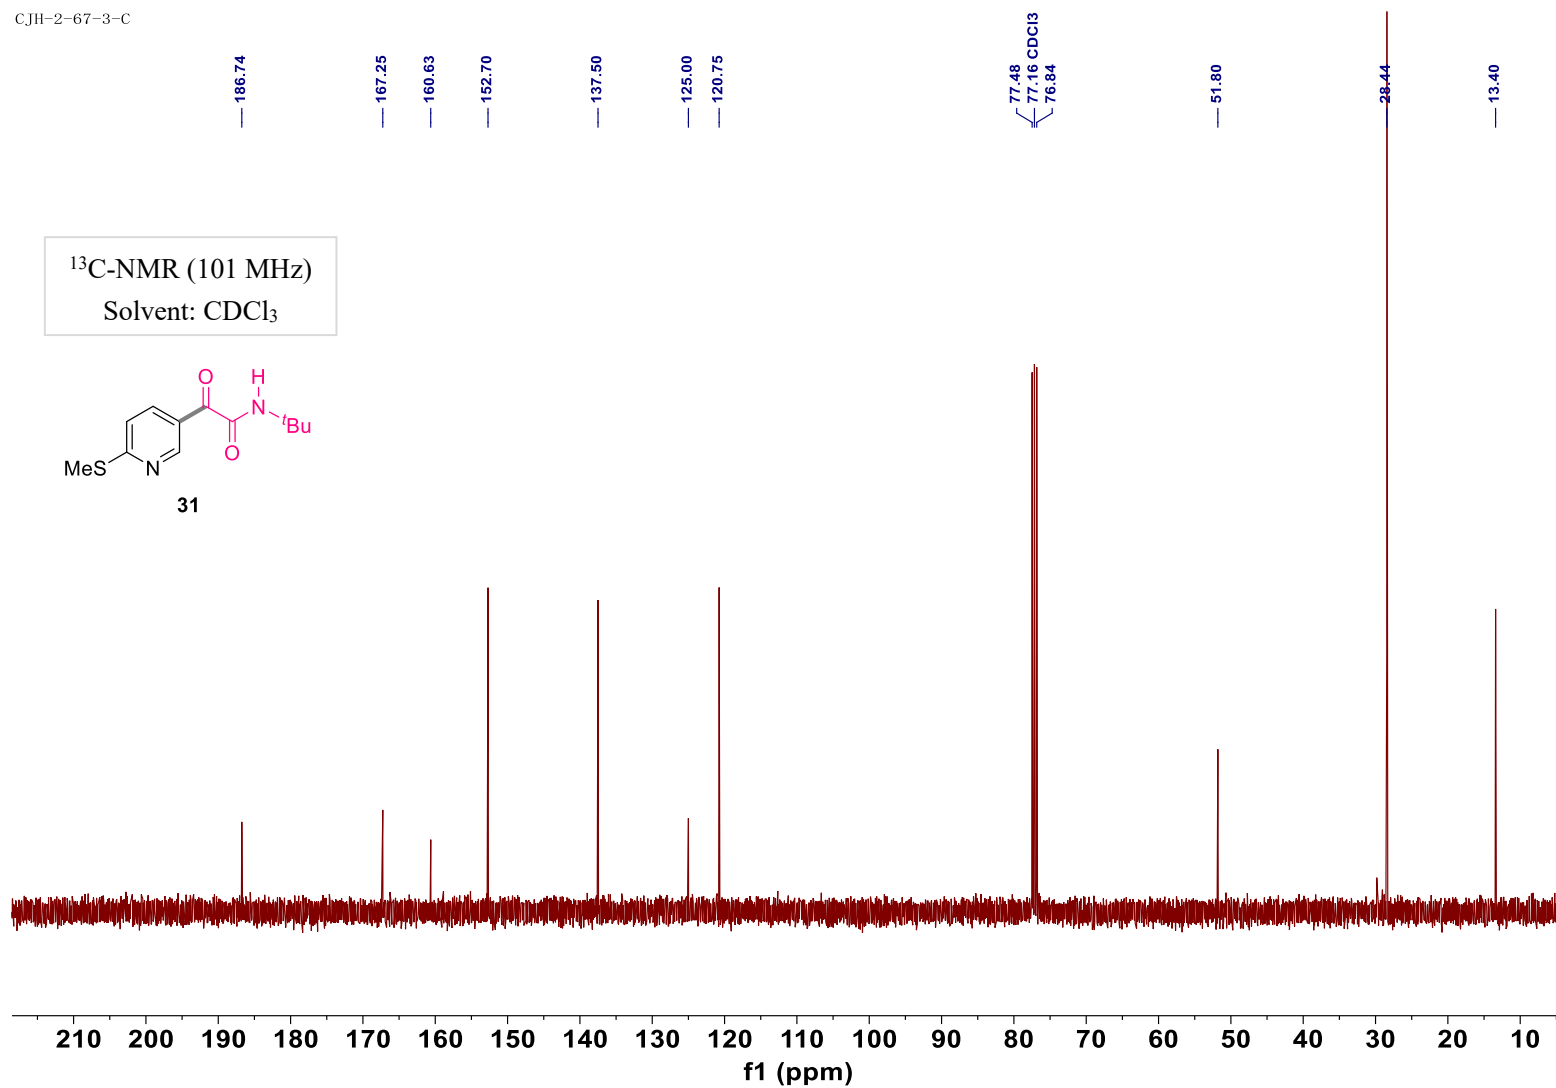

S138

CJH-1-117-3-H

9.2195  
9.2138

8.4213  
8.4154  
8.3983  
8.3924

7.2600 CDCl<sub>3</sub>

7.0269

6.5435  
6.5205

3.7675  
3.7566  
3.7521  
3.7439  
3.7399  
3.6977  
3.6937  
3.6812  
3.6704

1.3968

<sup>1</sup>H-NMR (400 MHz)  
Solvent: CDCl<sub>3</sub>

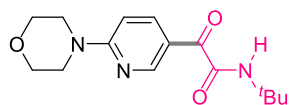

32

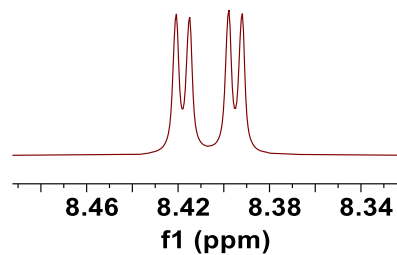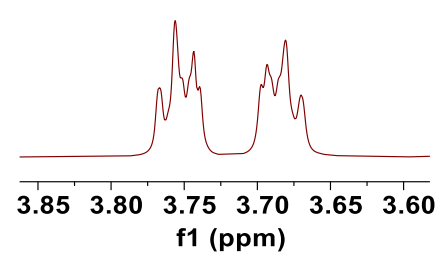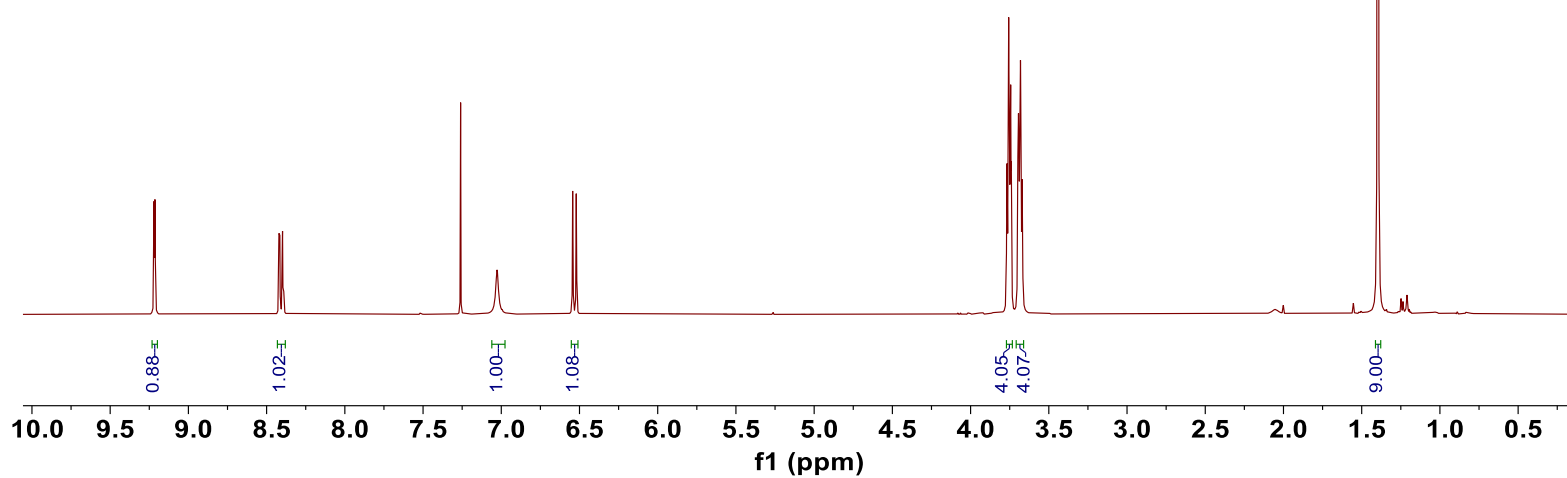

CJH-1-117-3-C

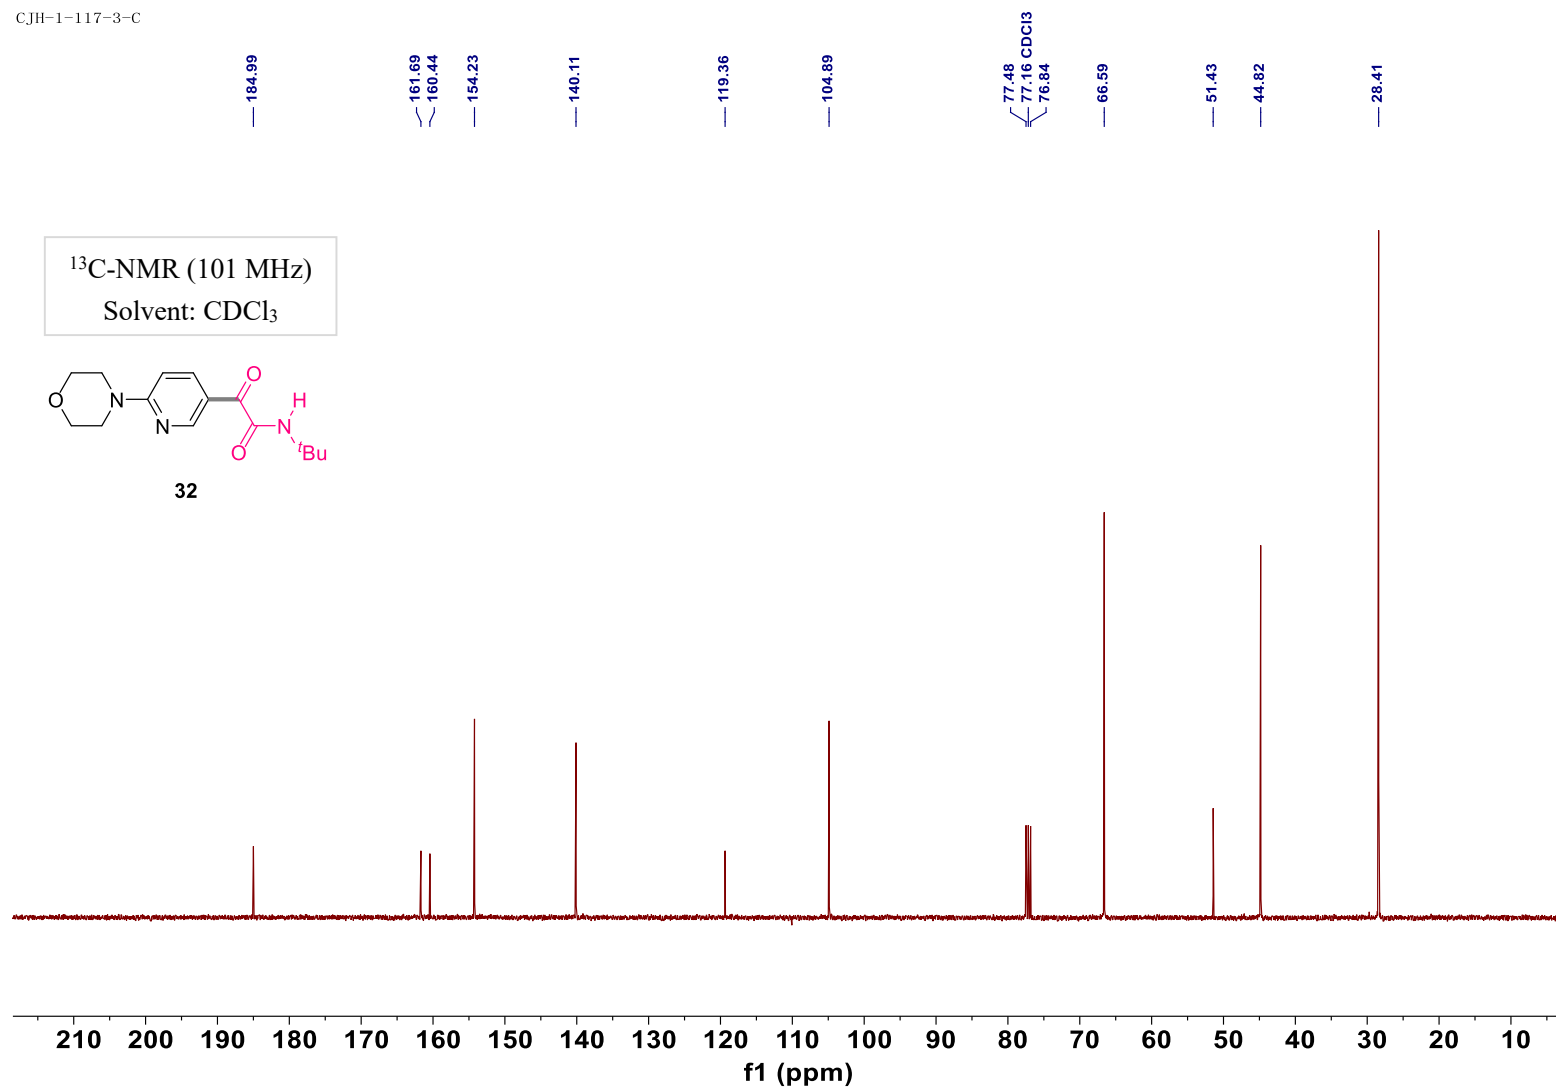

S140

CJH-1-118-1-H

$^1\text{H}$ -NMR (400 MHz)

Solvent:  $\text{CDCl}_3$

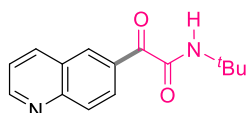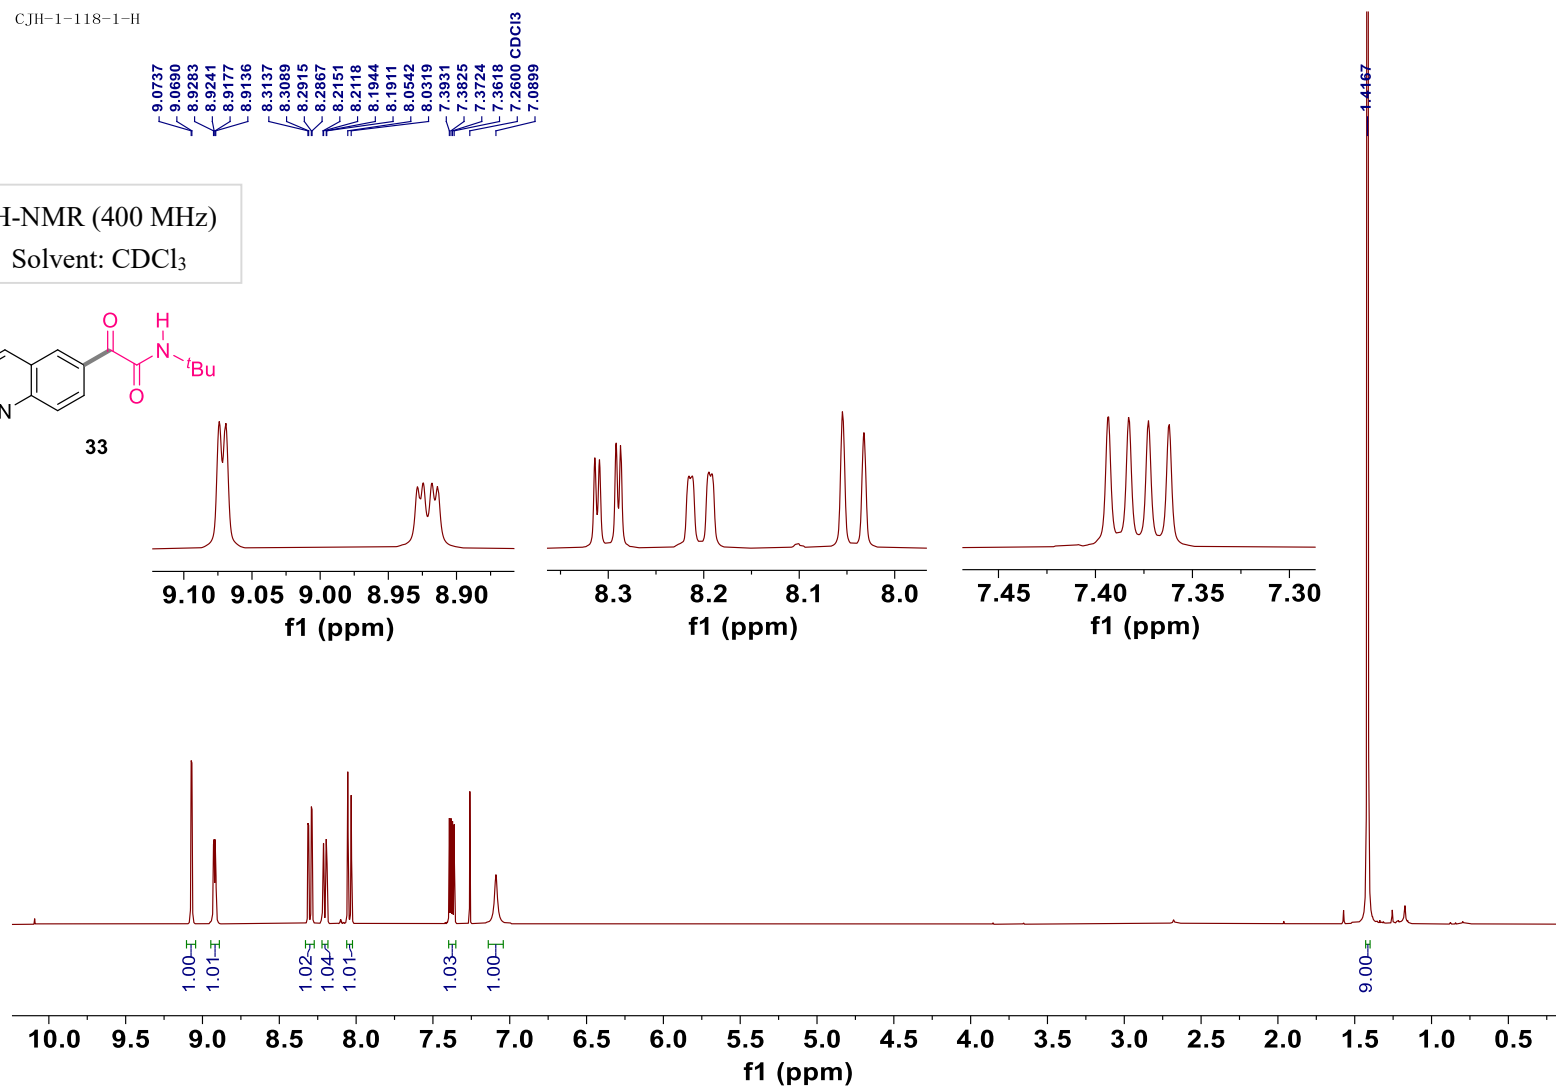

CJH-1-118-1-C

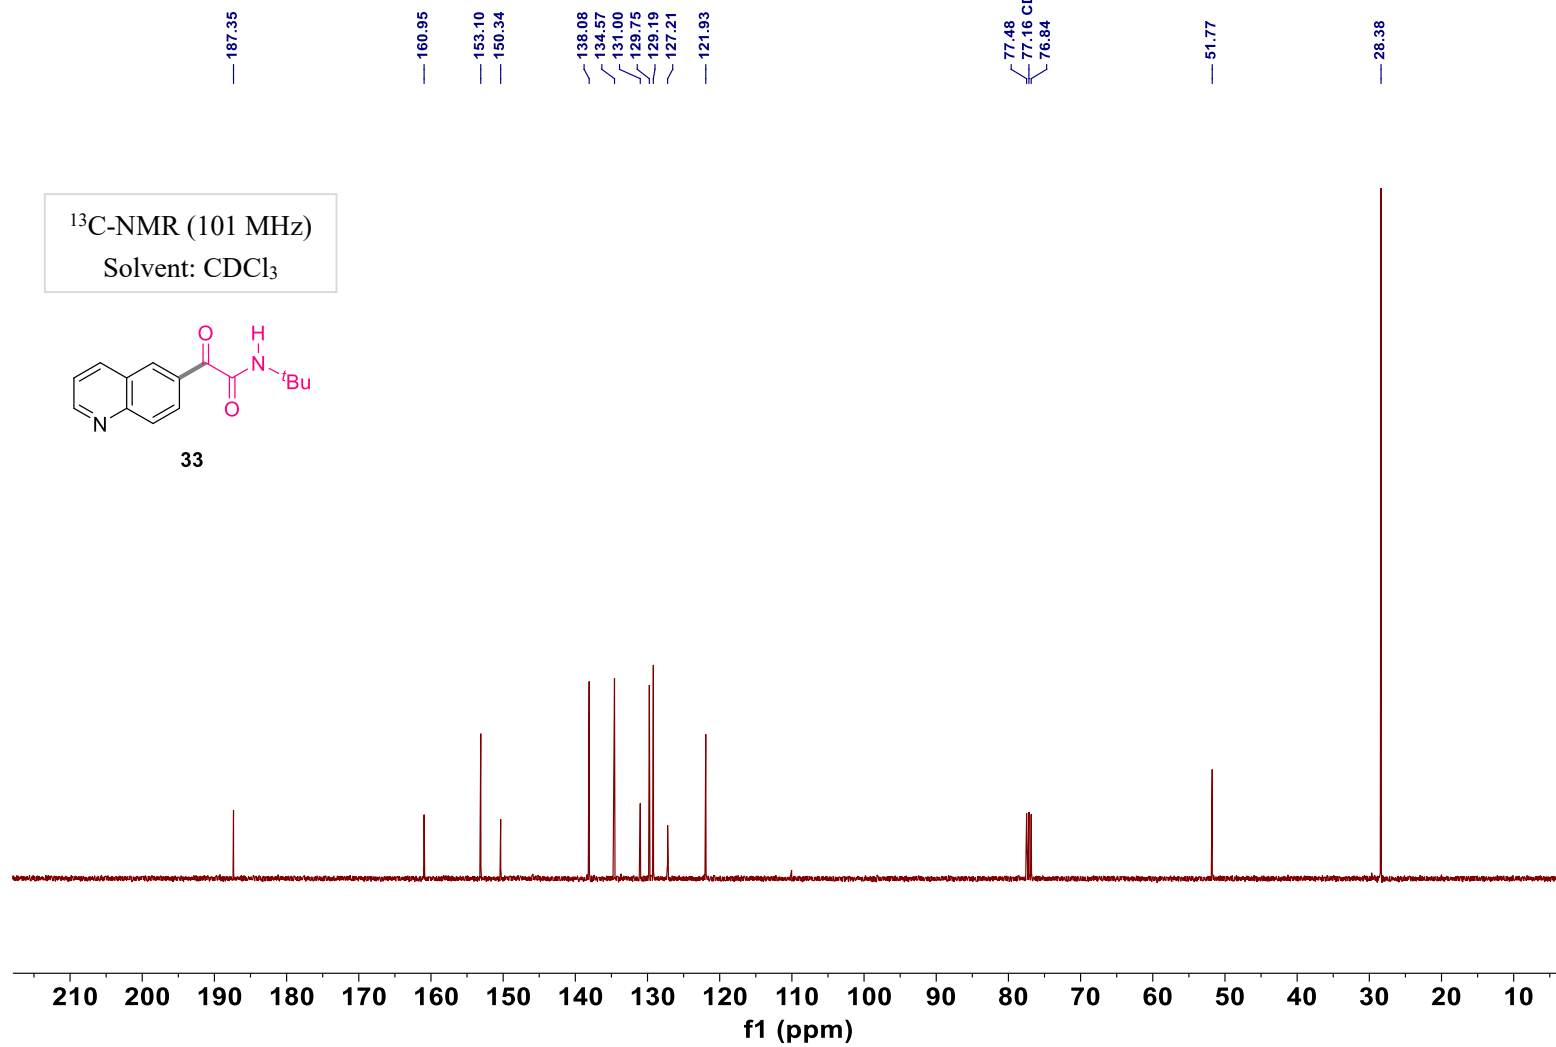

S142

CJH-1-120-2-H

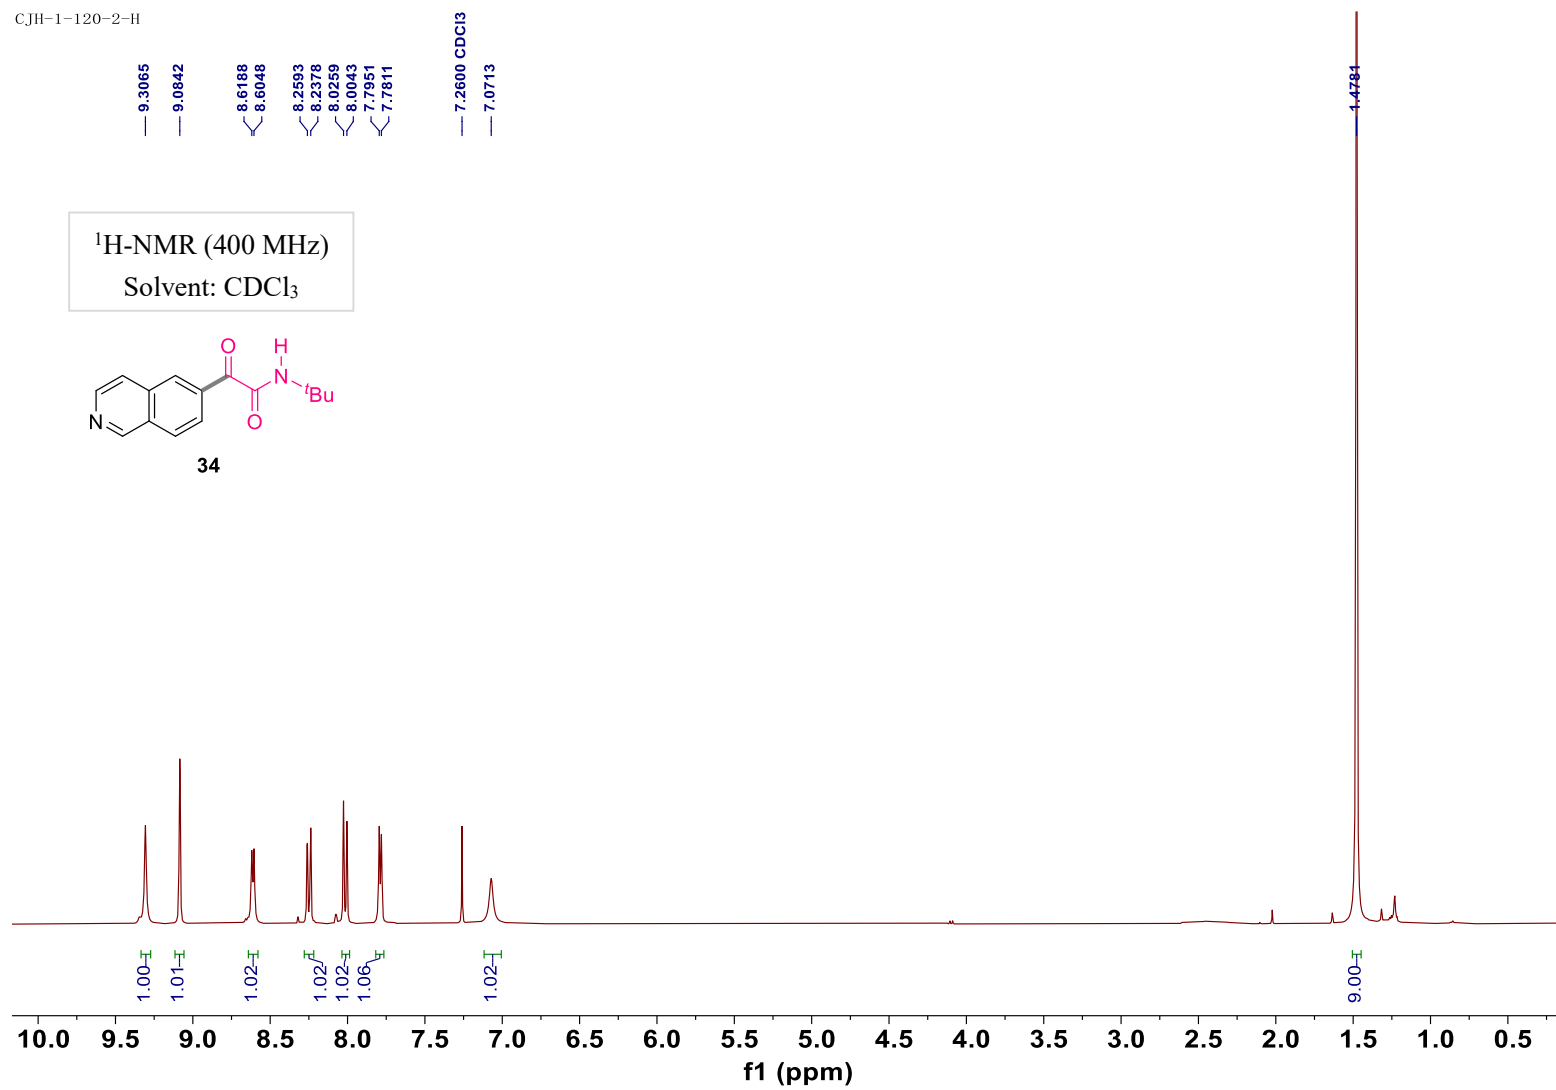

S143

CJH-1-120-2-C

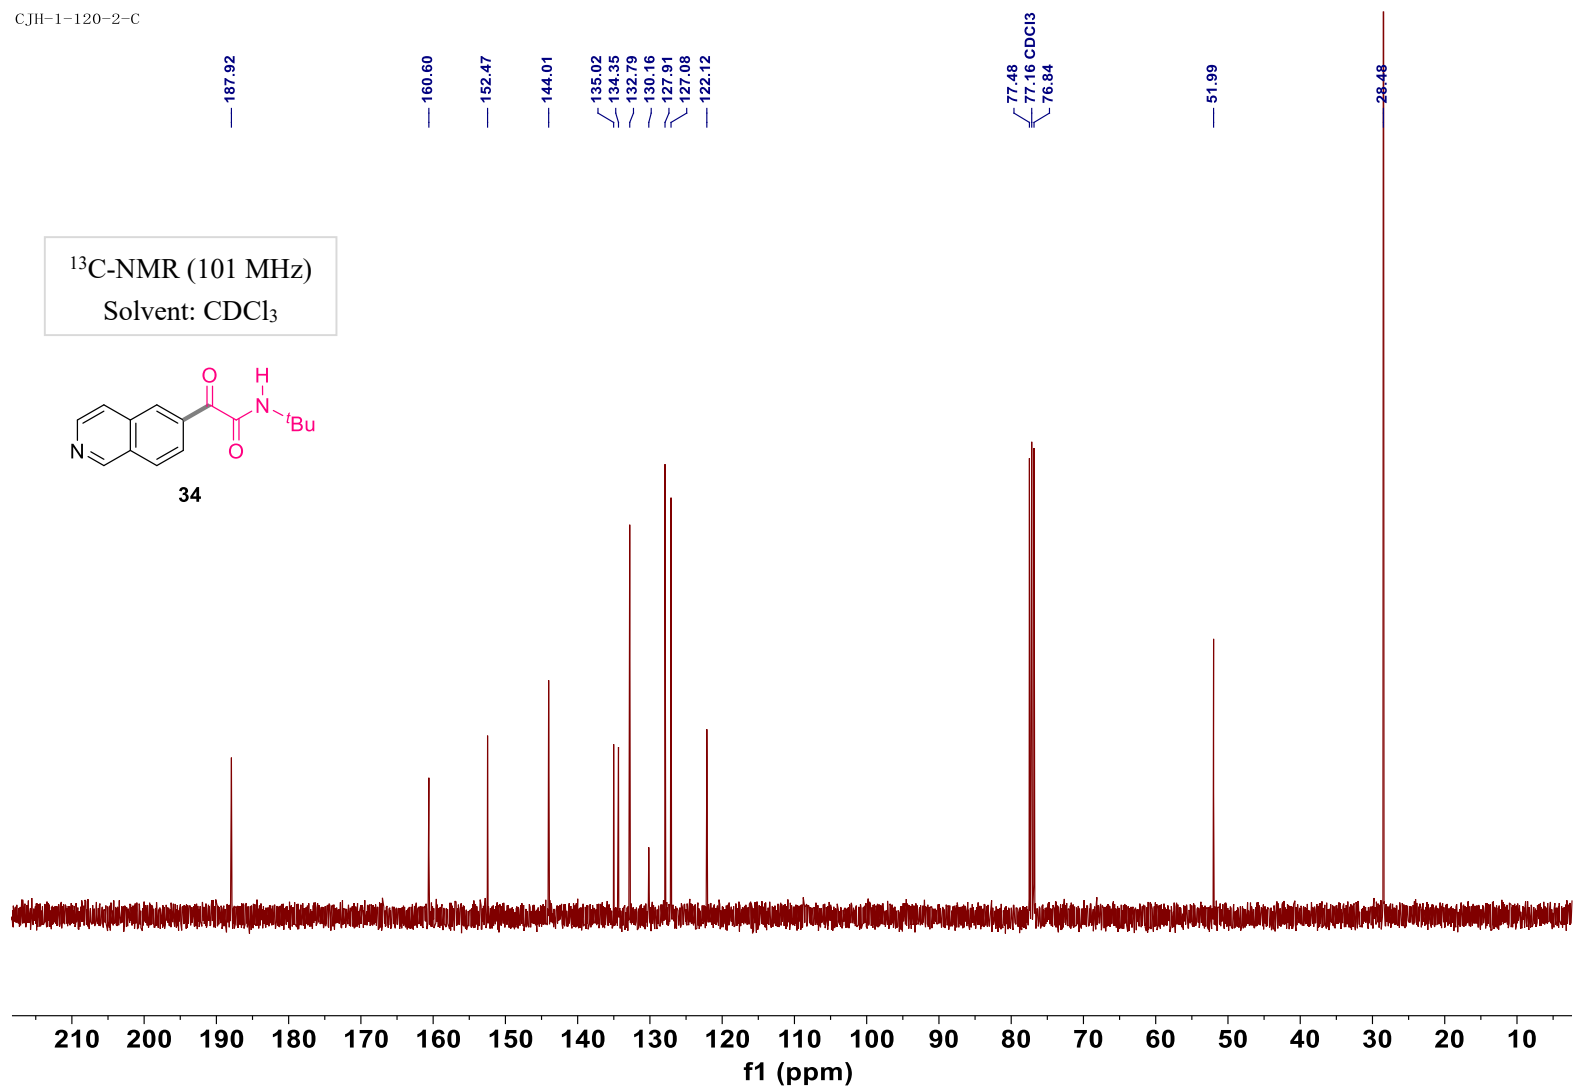

S144

CJH-1-111-3-H

9.1559  
8.1699  
8.1658  
8.1482  
8.1441  
7.9920  
7.9717  
7.8598  
7.8378  
7.8170  
7.6103  
7.6075  
7.5929  
7.5902  
7.5729  
7.5698  
7.5405  
7.5378  
7.5203  
7.5029  
7.5003  
7.2600 CDCl<sub>3</sub>  
7.0884

<sup>1</sup>H-NMR (400 MHz)

Solvent: CDCl<sub>3</sub>

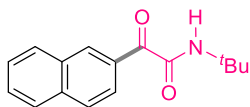

35

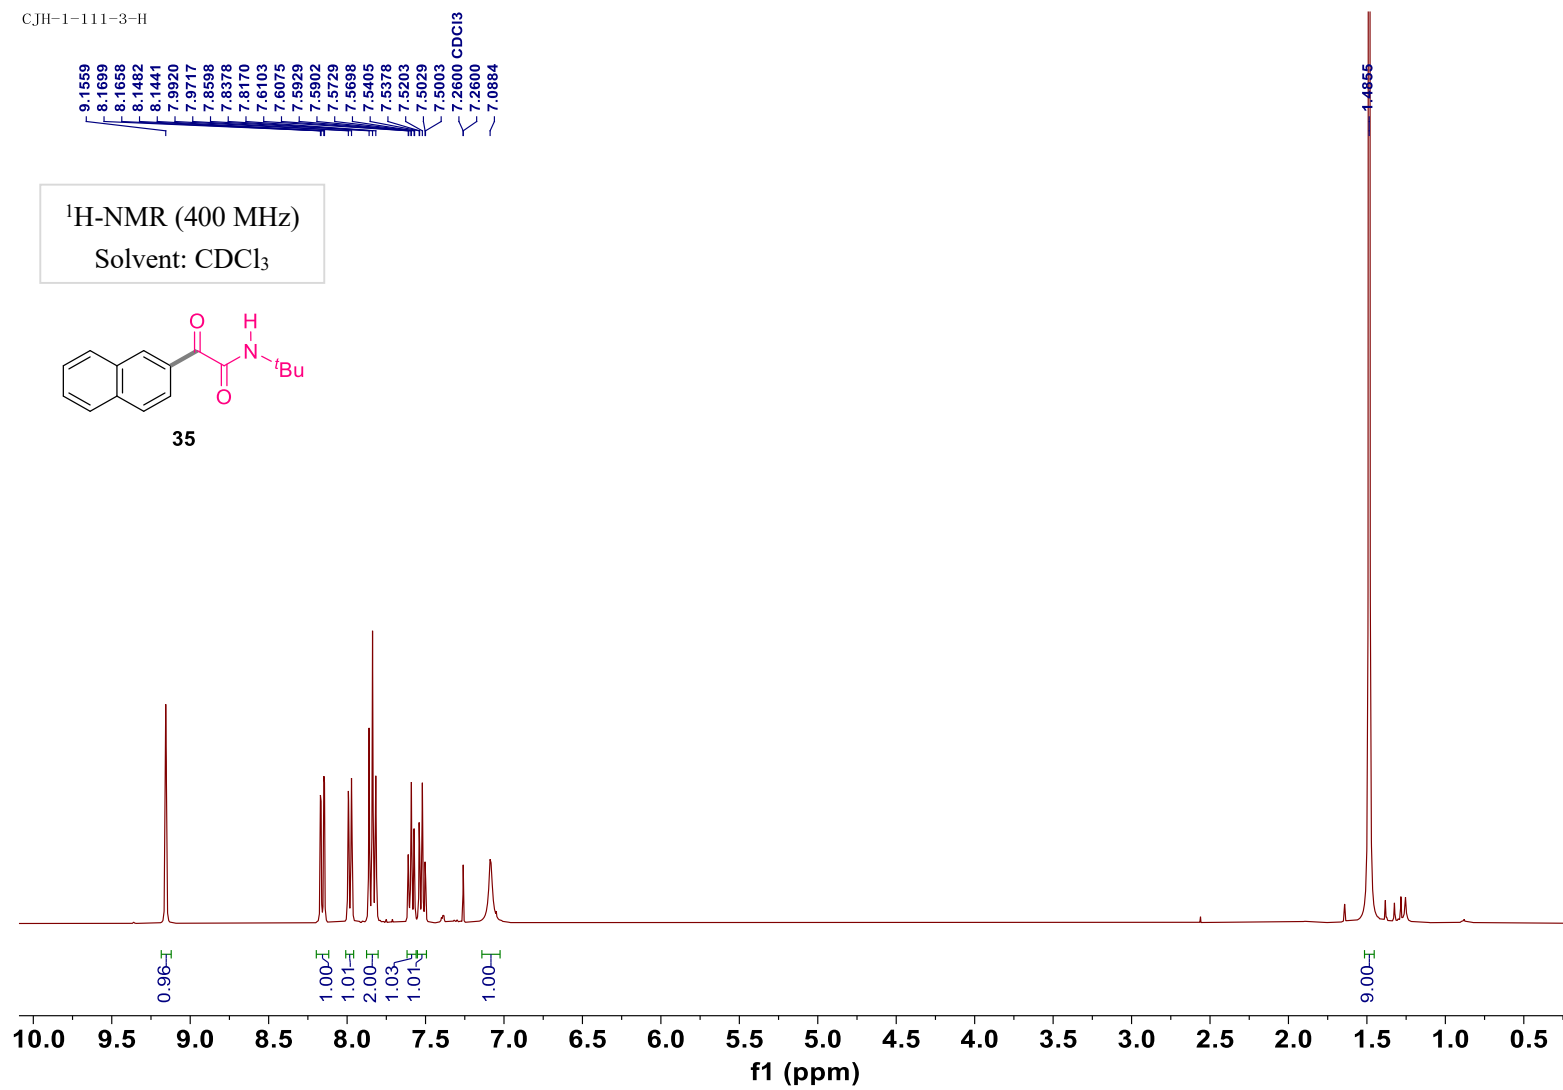

S145



CJH-1-111-3-C

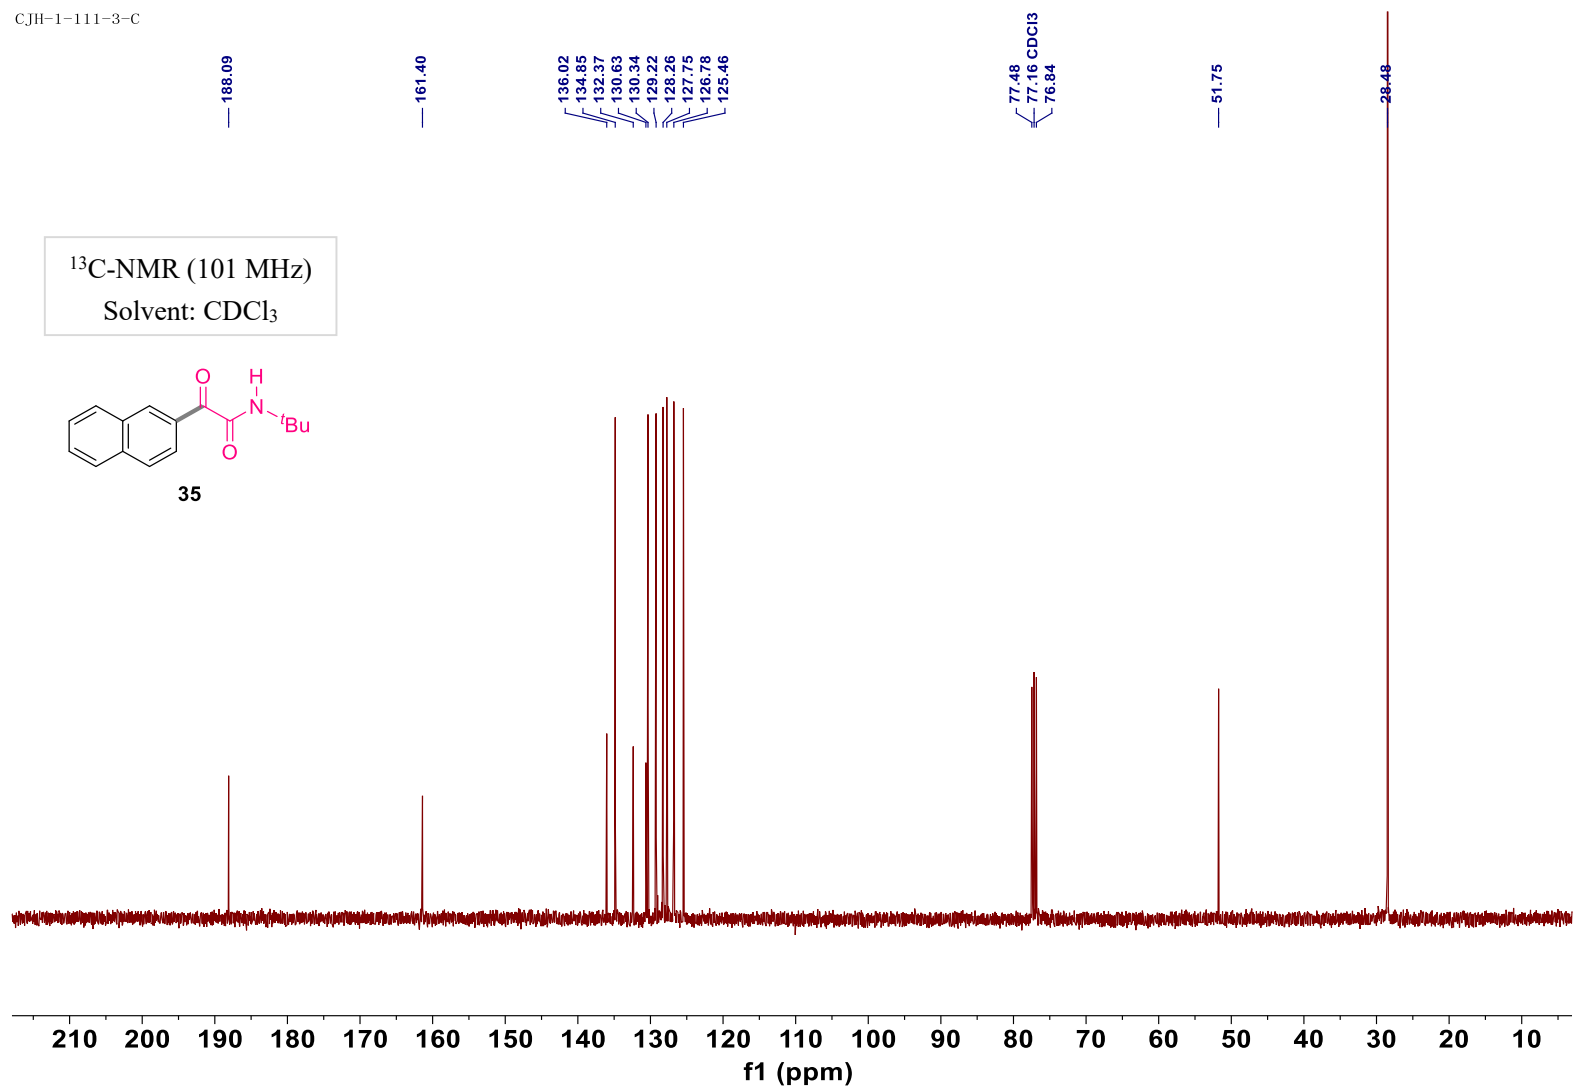

S146

CJH-2-61-1-H

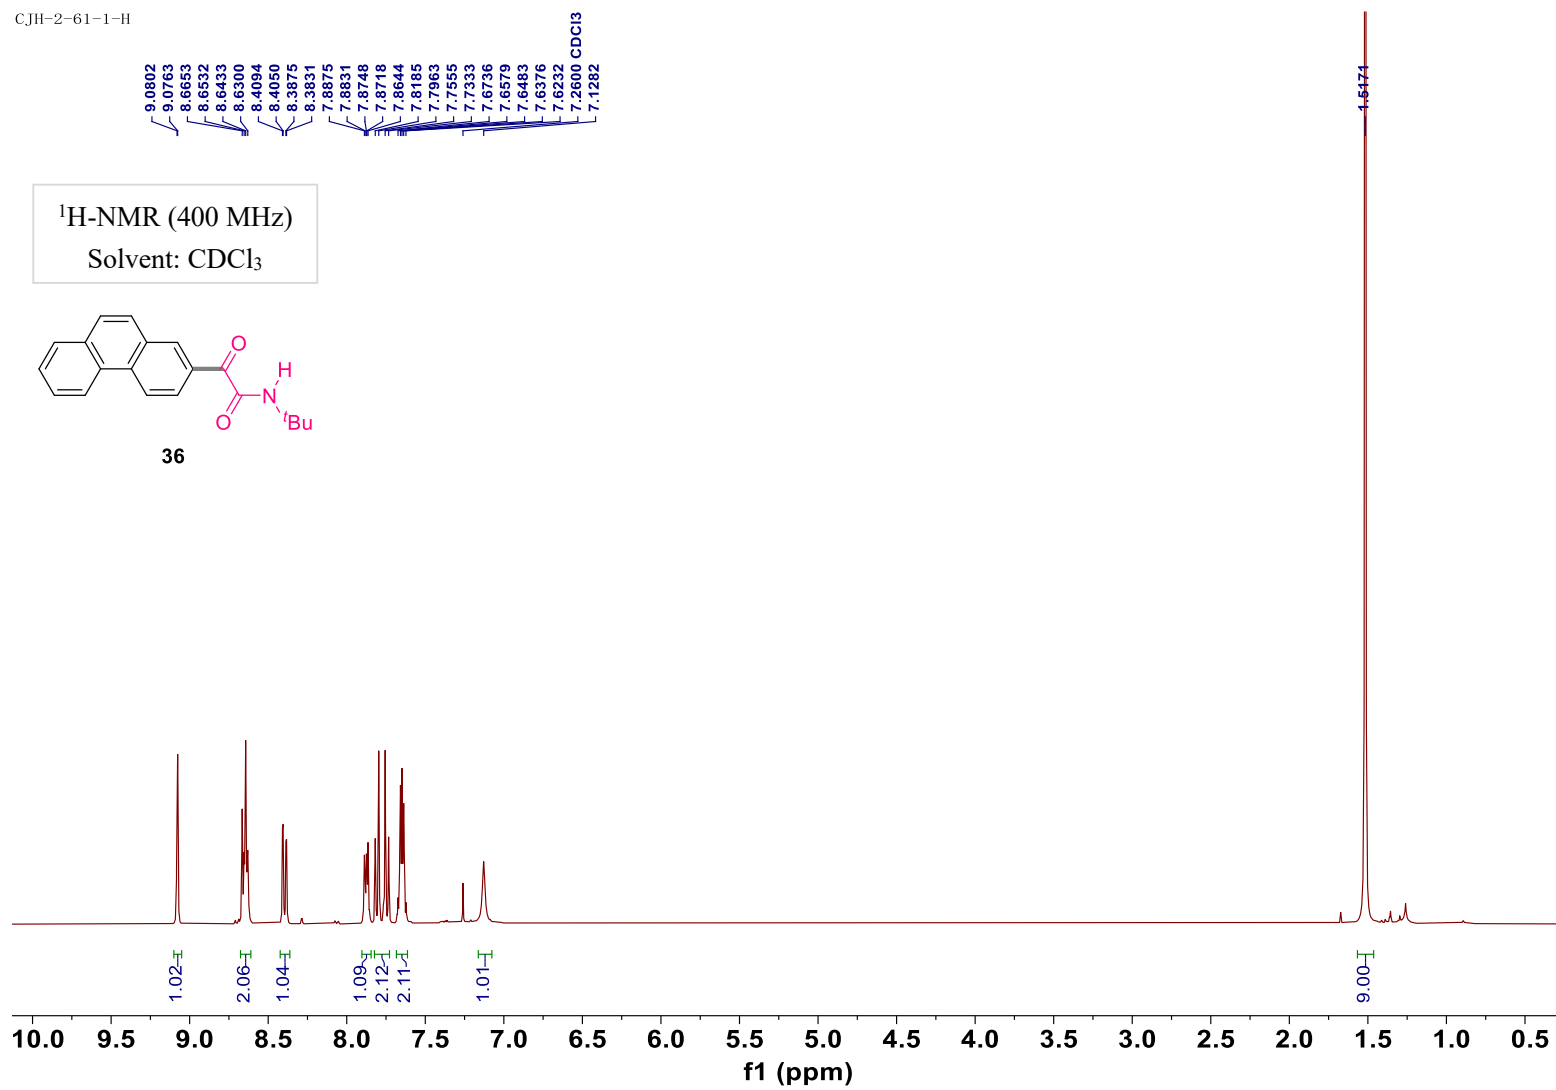

S147

CJH-2-61-1-C

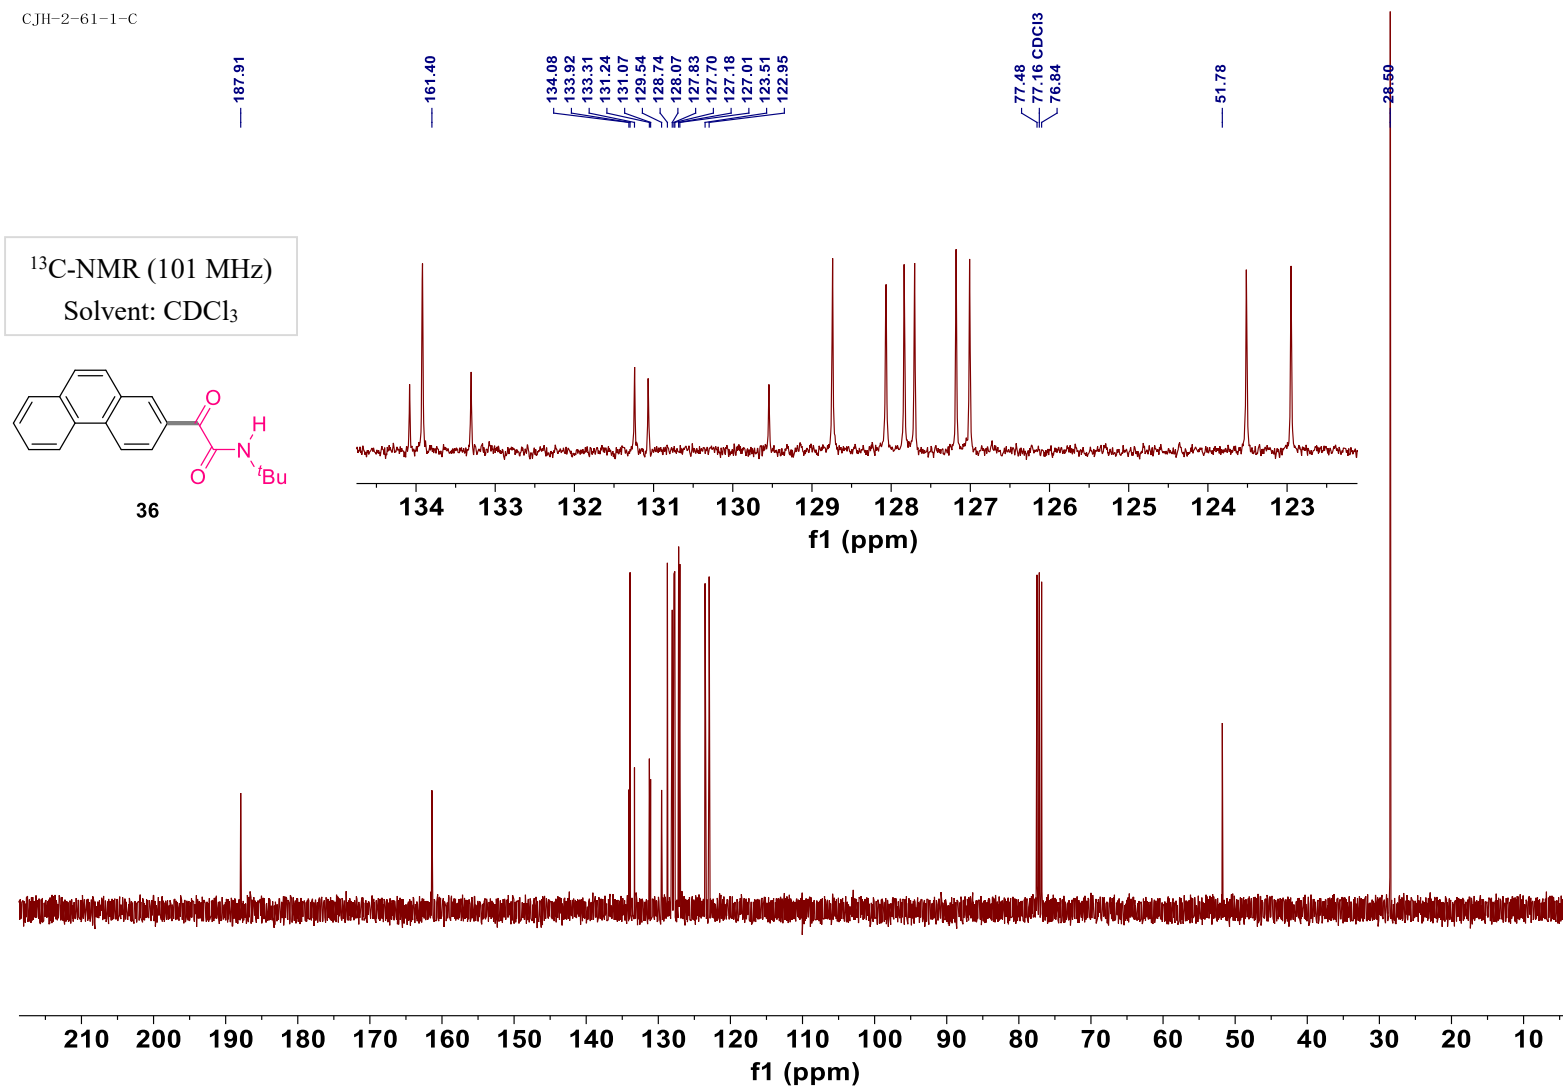

CJH-2-62-2-H

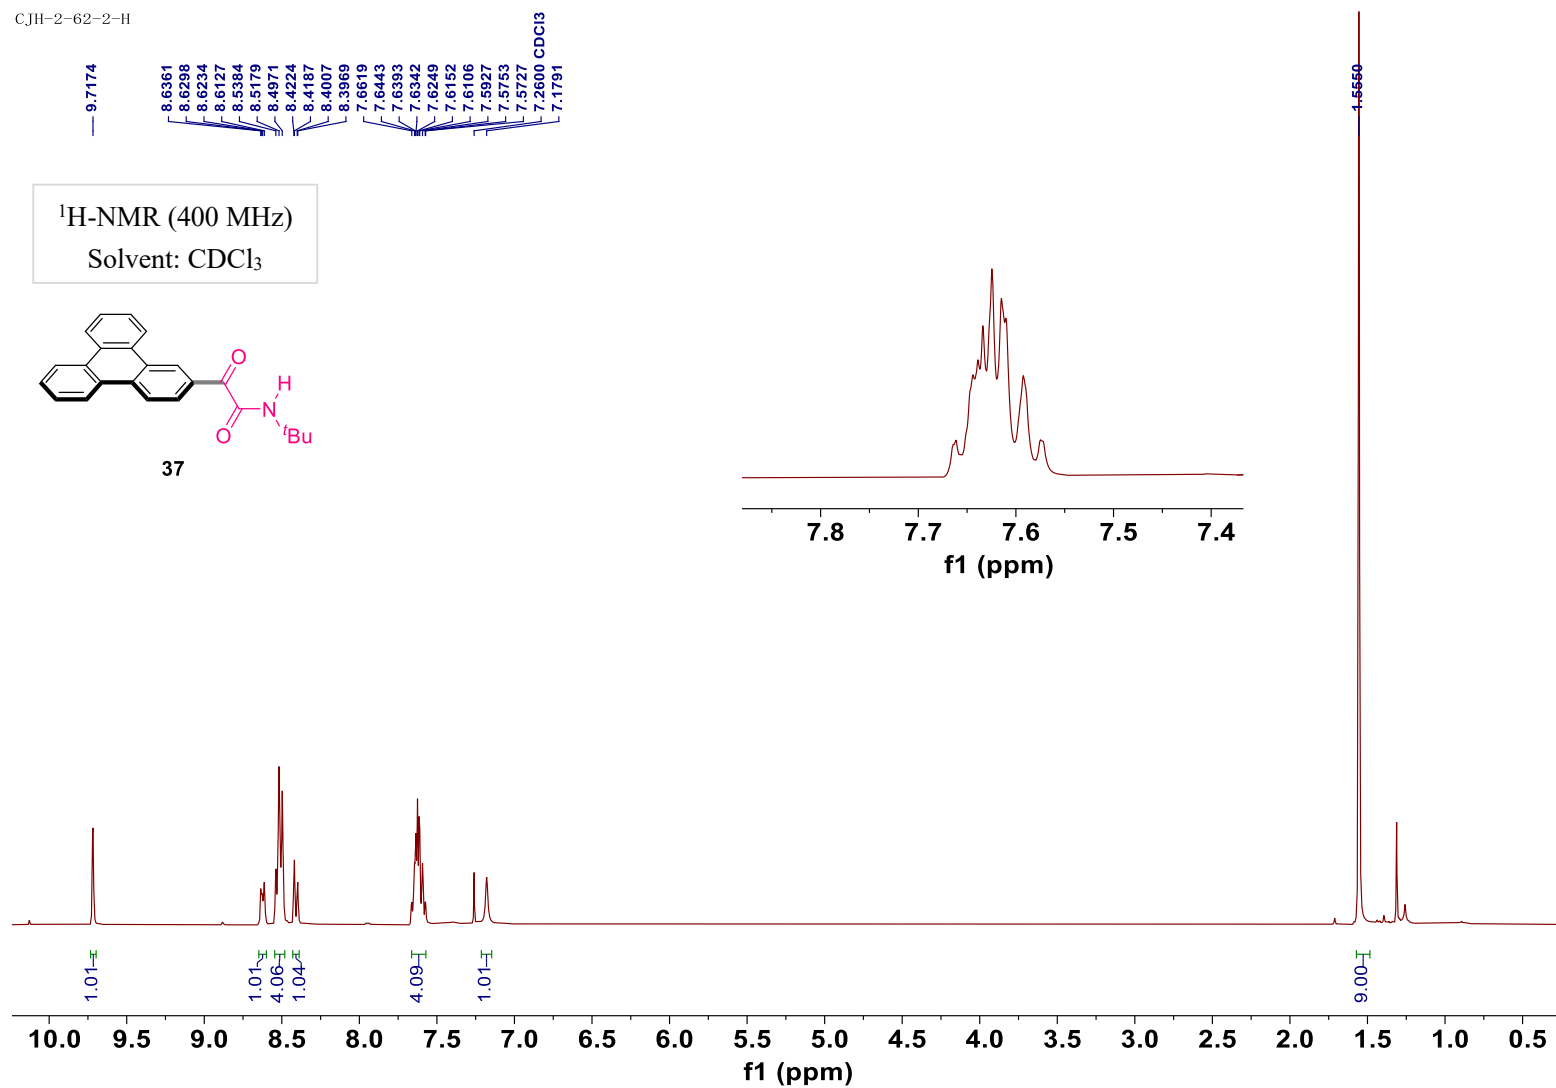

CJH-2-62-2-C

$^{13}\text{C}$ -NMR (101 MHz)  
Solvent:  $\text{CDCl}_3$

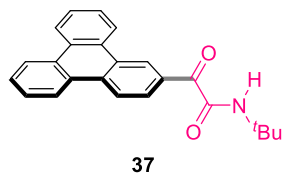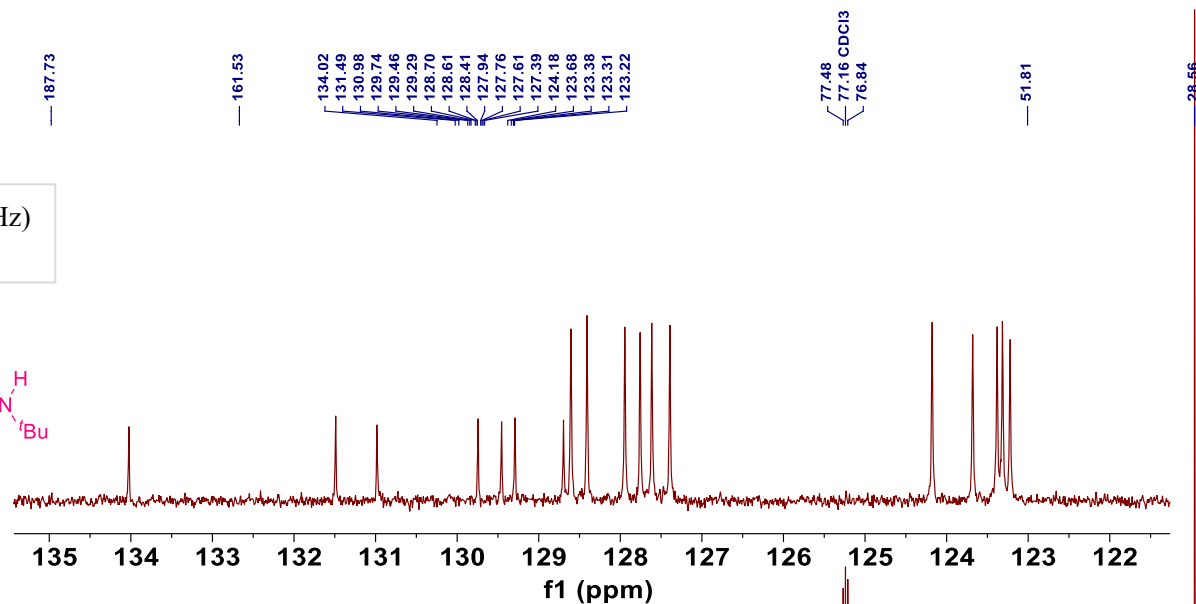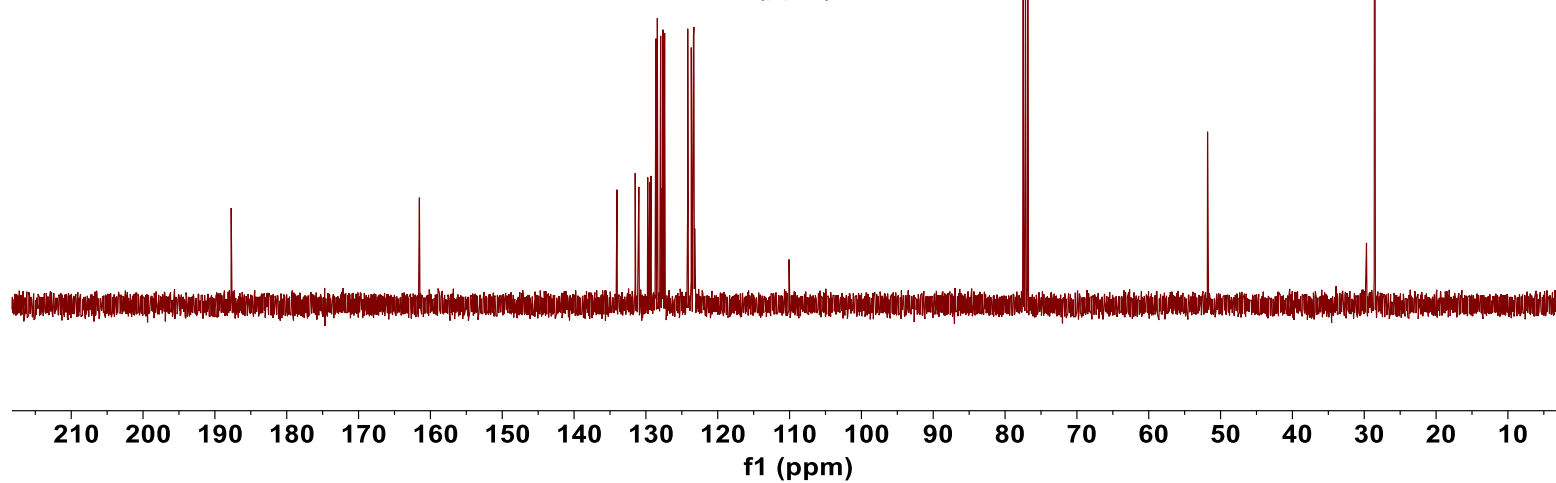

S150

CJH-2-61-2-H

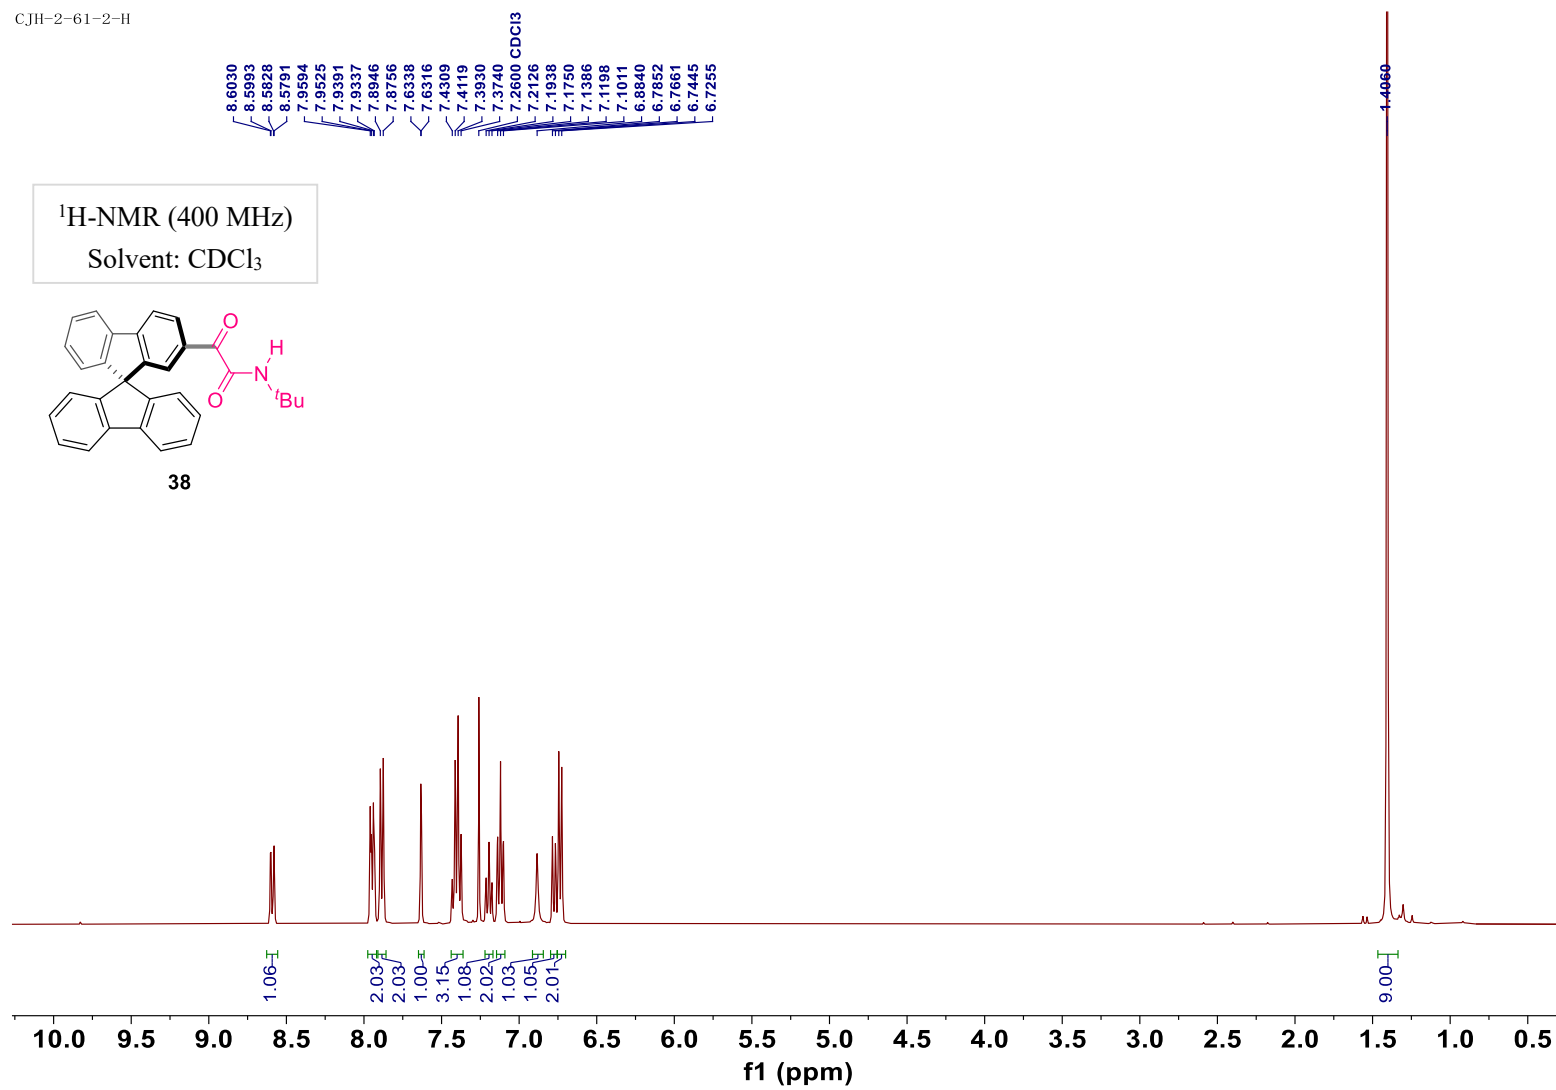

CJH-2-61-2-C

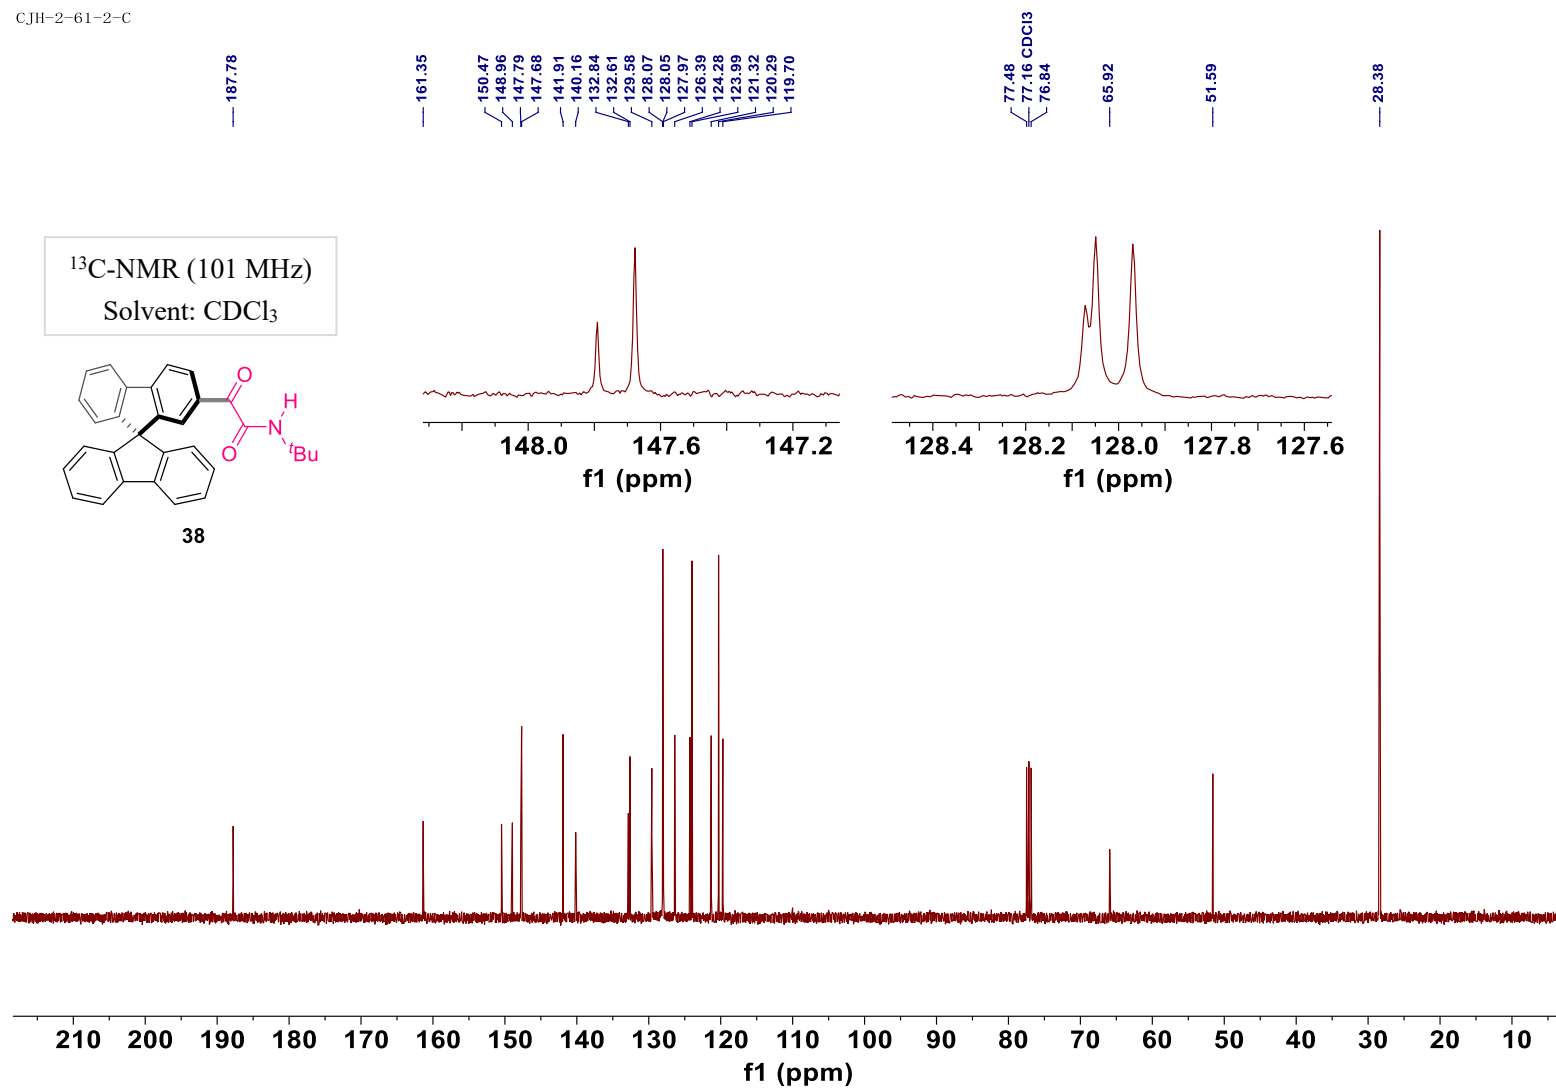

CJH-1-123-2-H

<sup>1</sup>H-NMR (400 MHz)  
Solvent: CDCl<sub>3</sub>

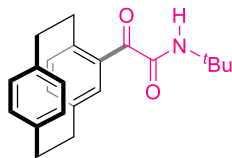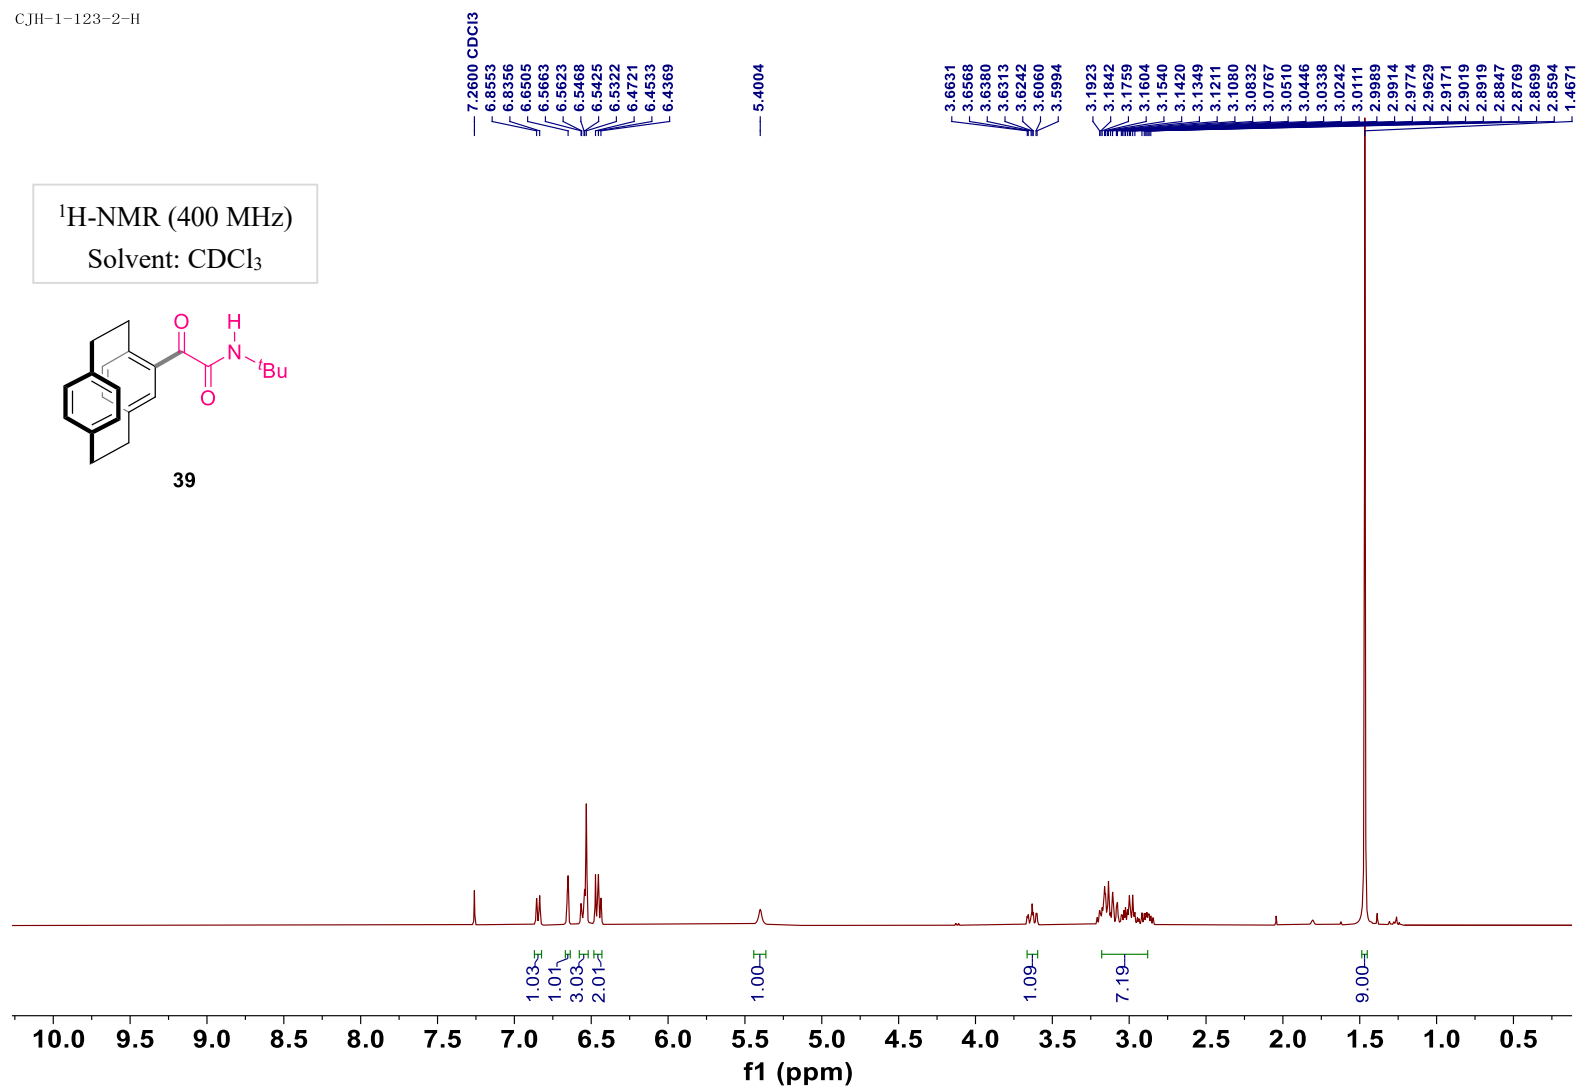



CJH-1-123-2-C

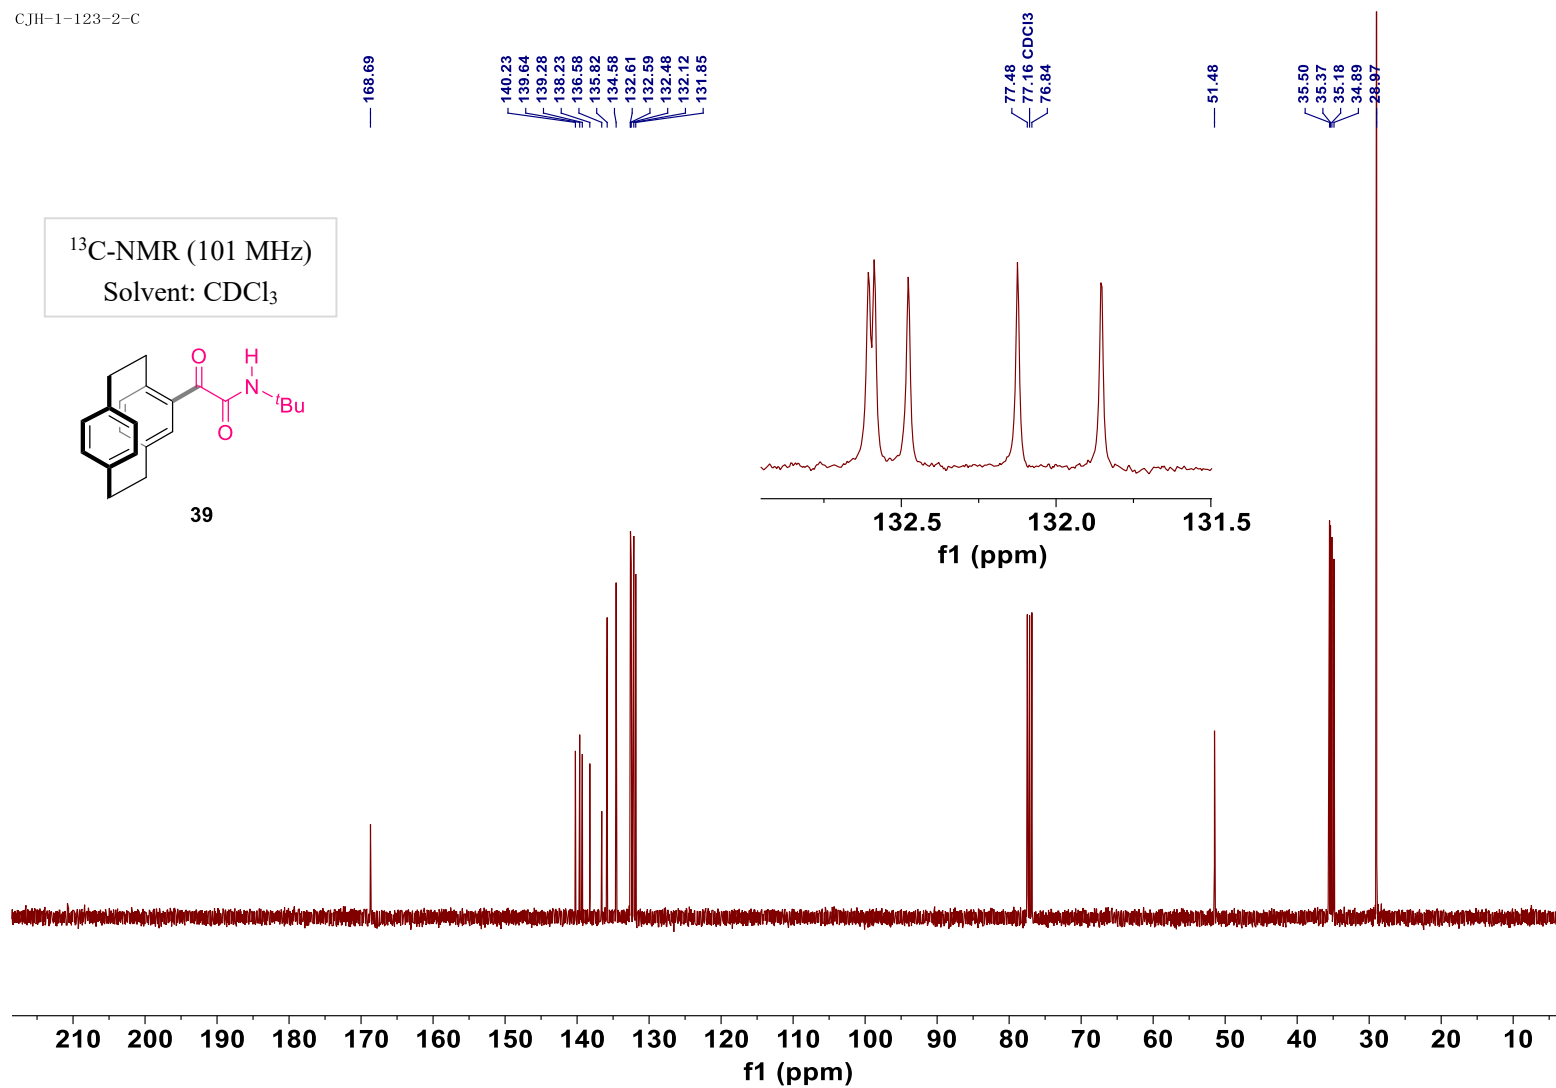

CJH-1-102-1-H

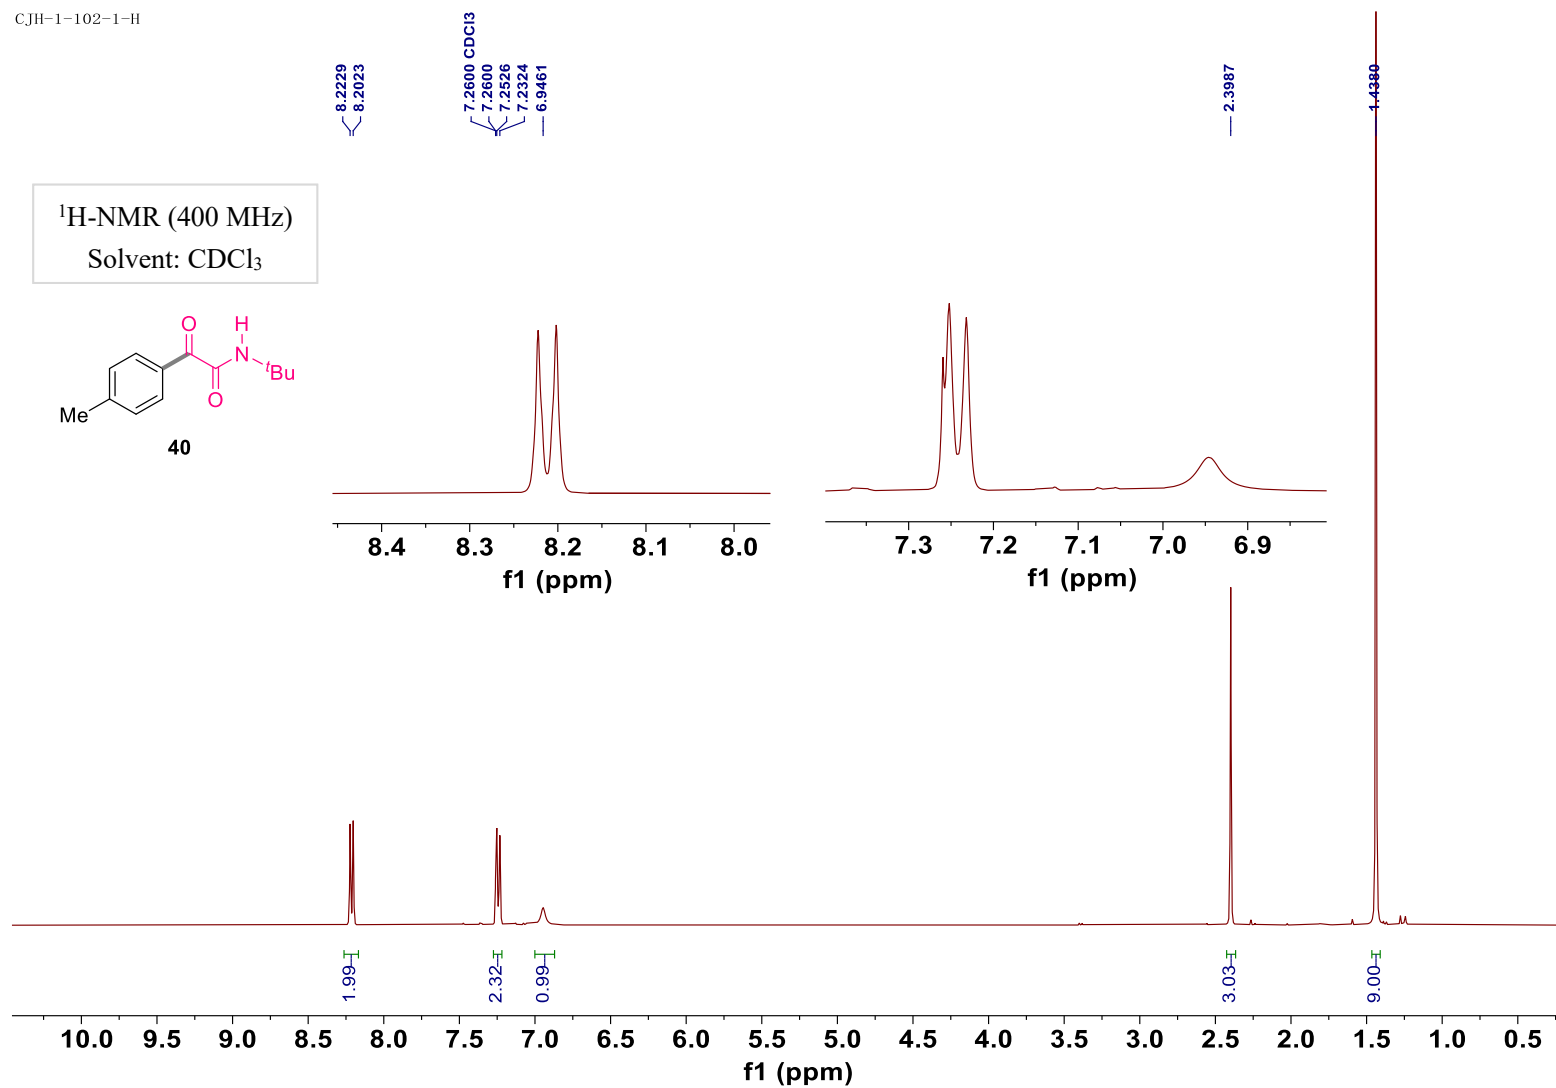

CJH-1-102-1-C

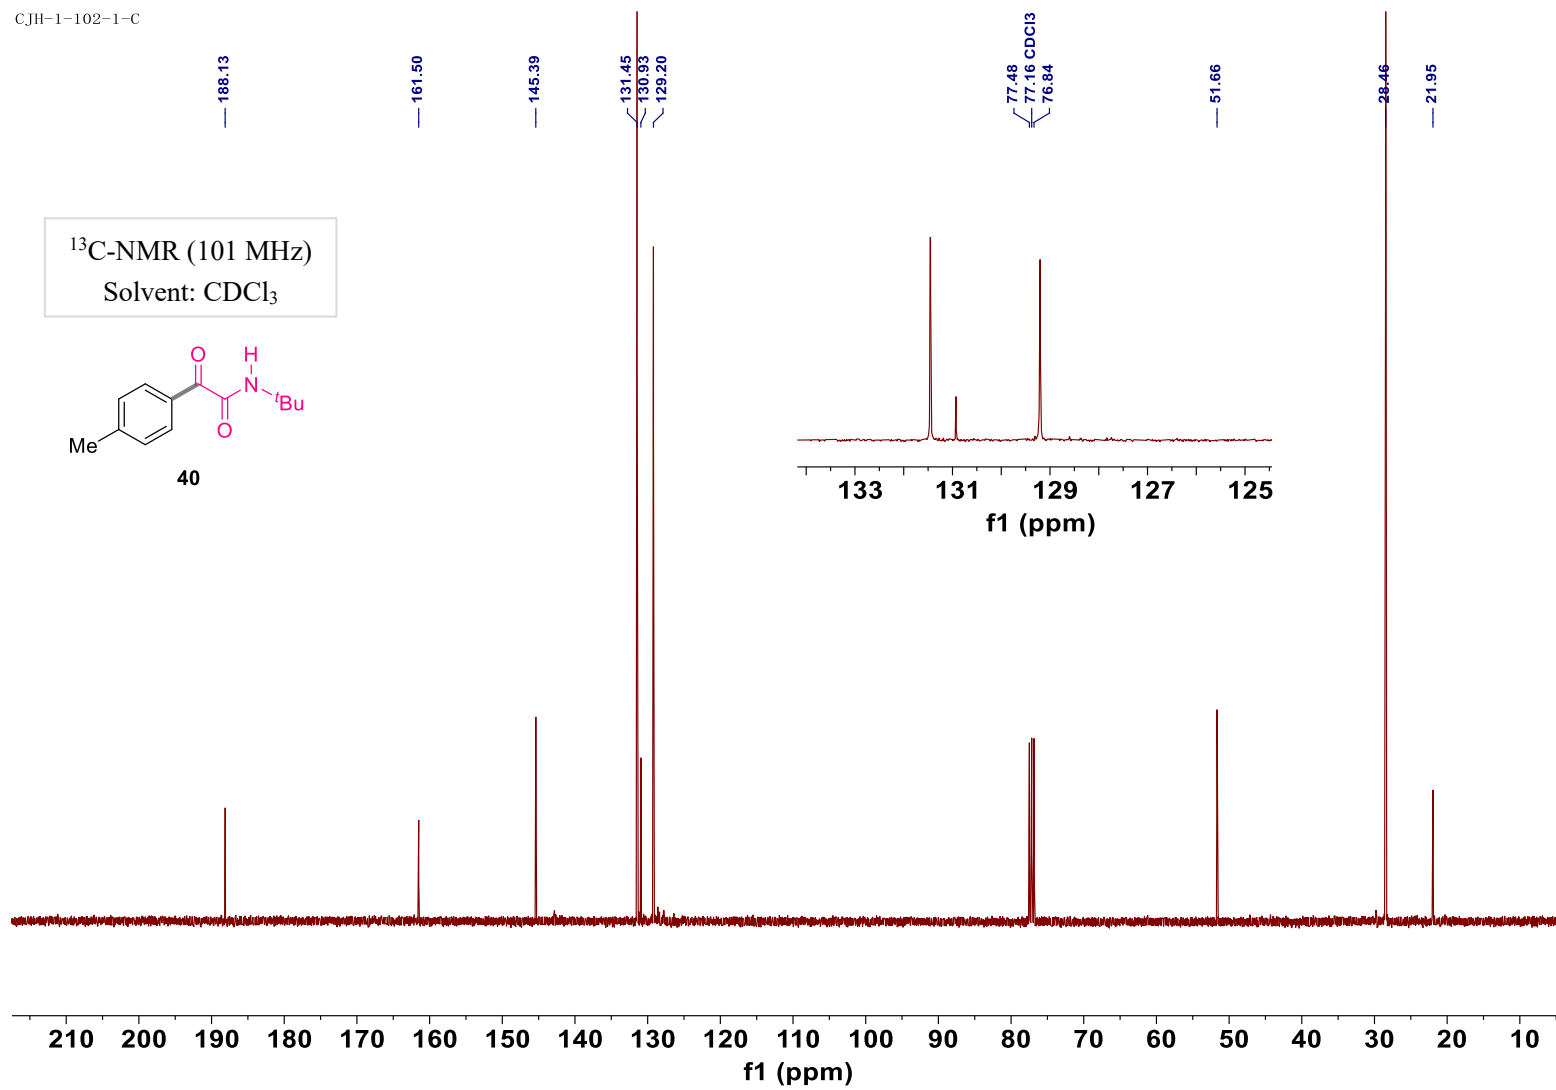

CJH-3-28-2-H

<sup>1</sup>H-NMR (400 MHz)  
Solvent: CDCl<sub>3</sub>

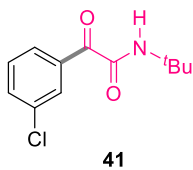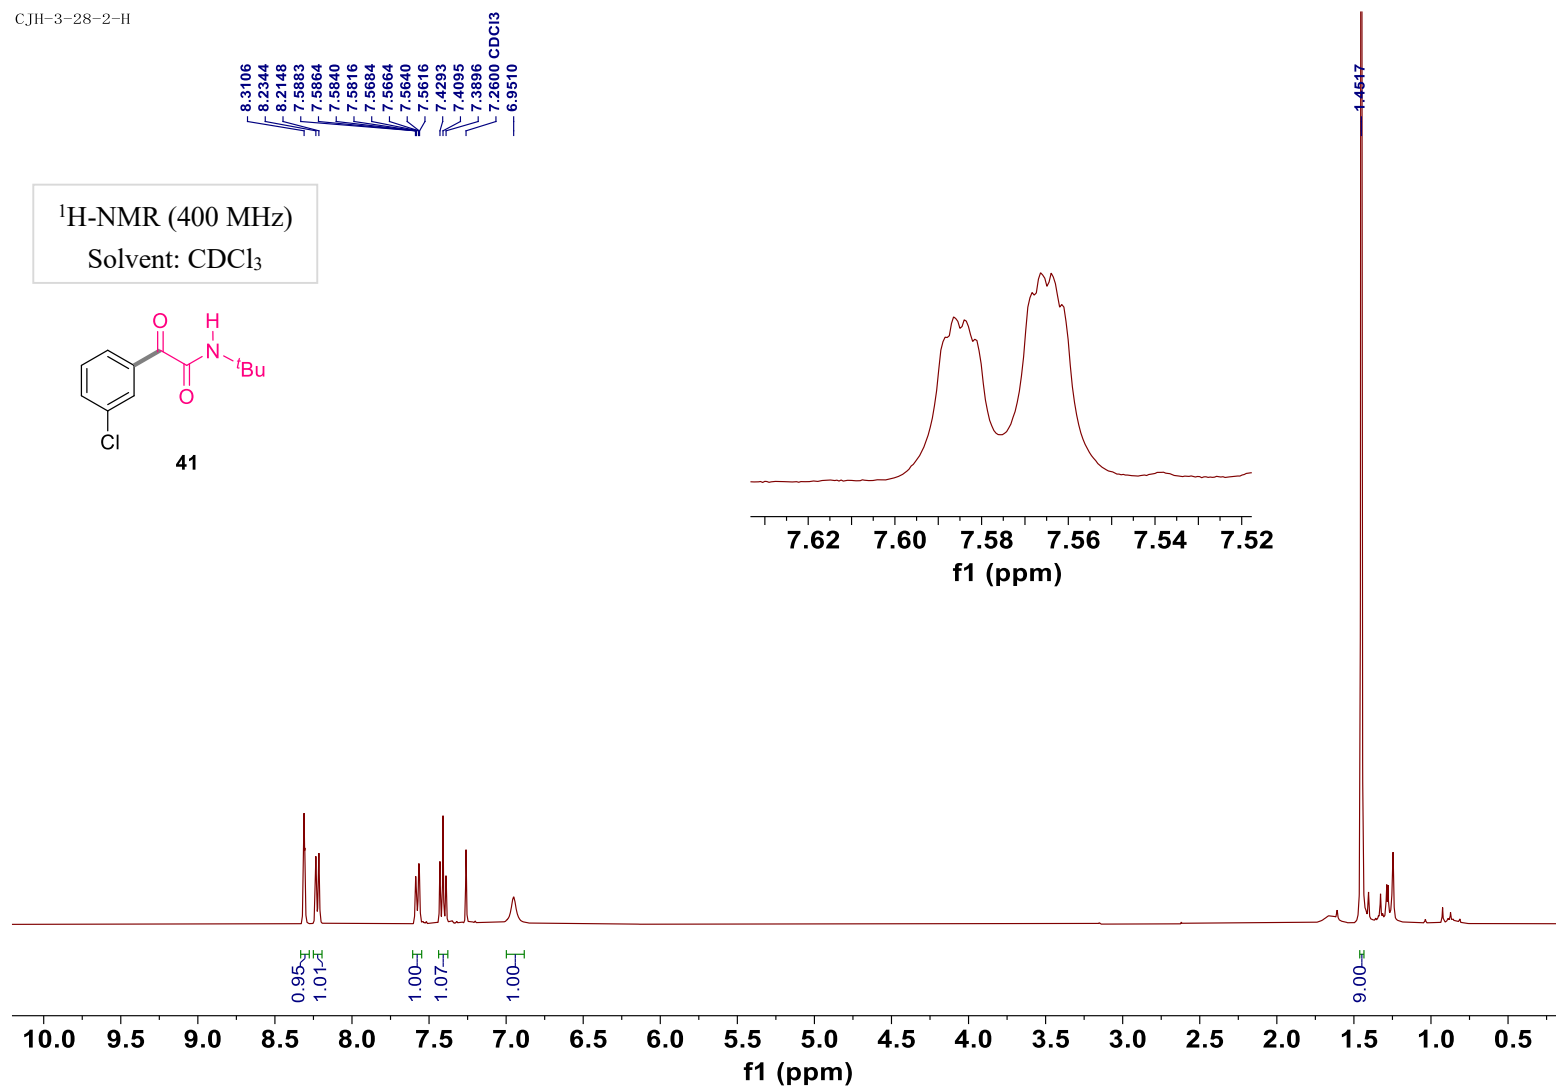

CJH-3-28-2-C

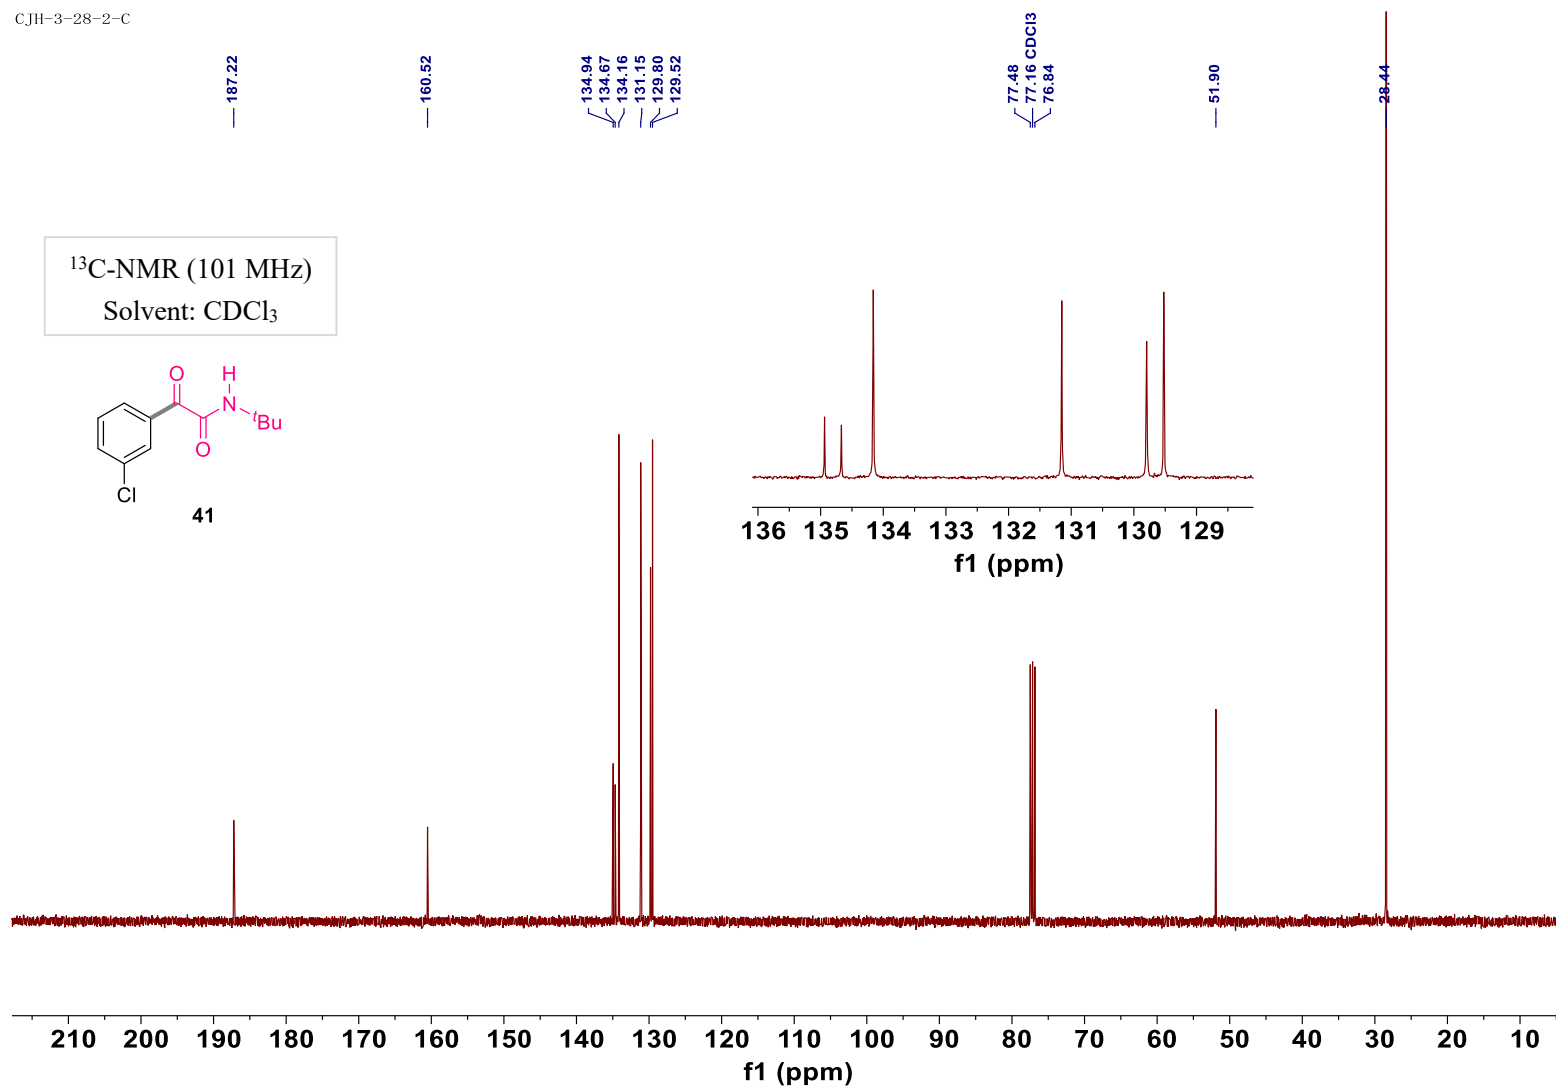

CJH-3-28-3-H

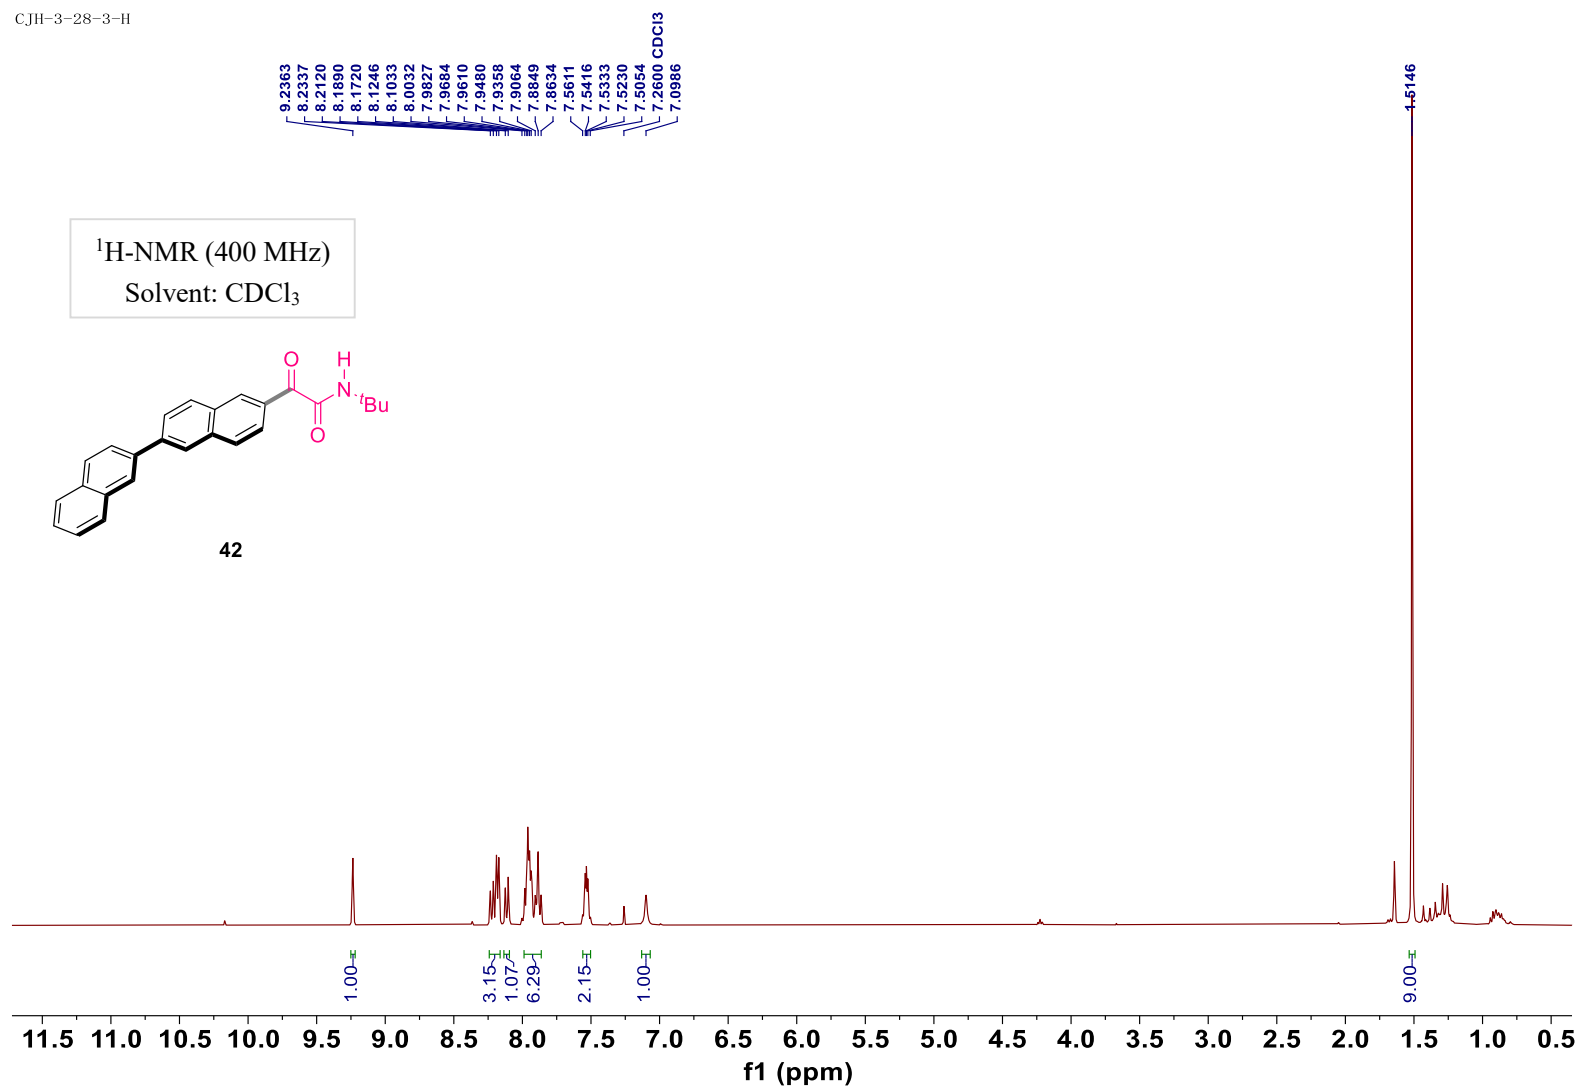

CJH-3-28-3-C

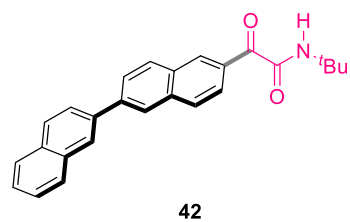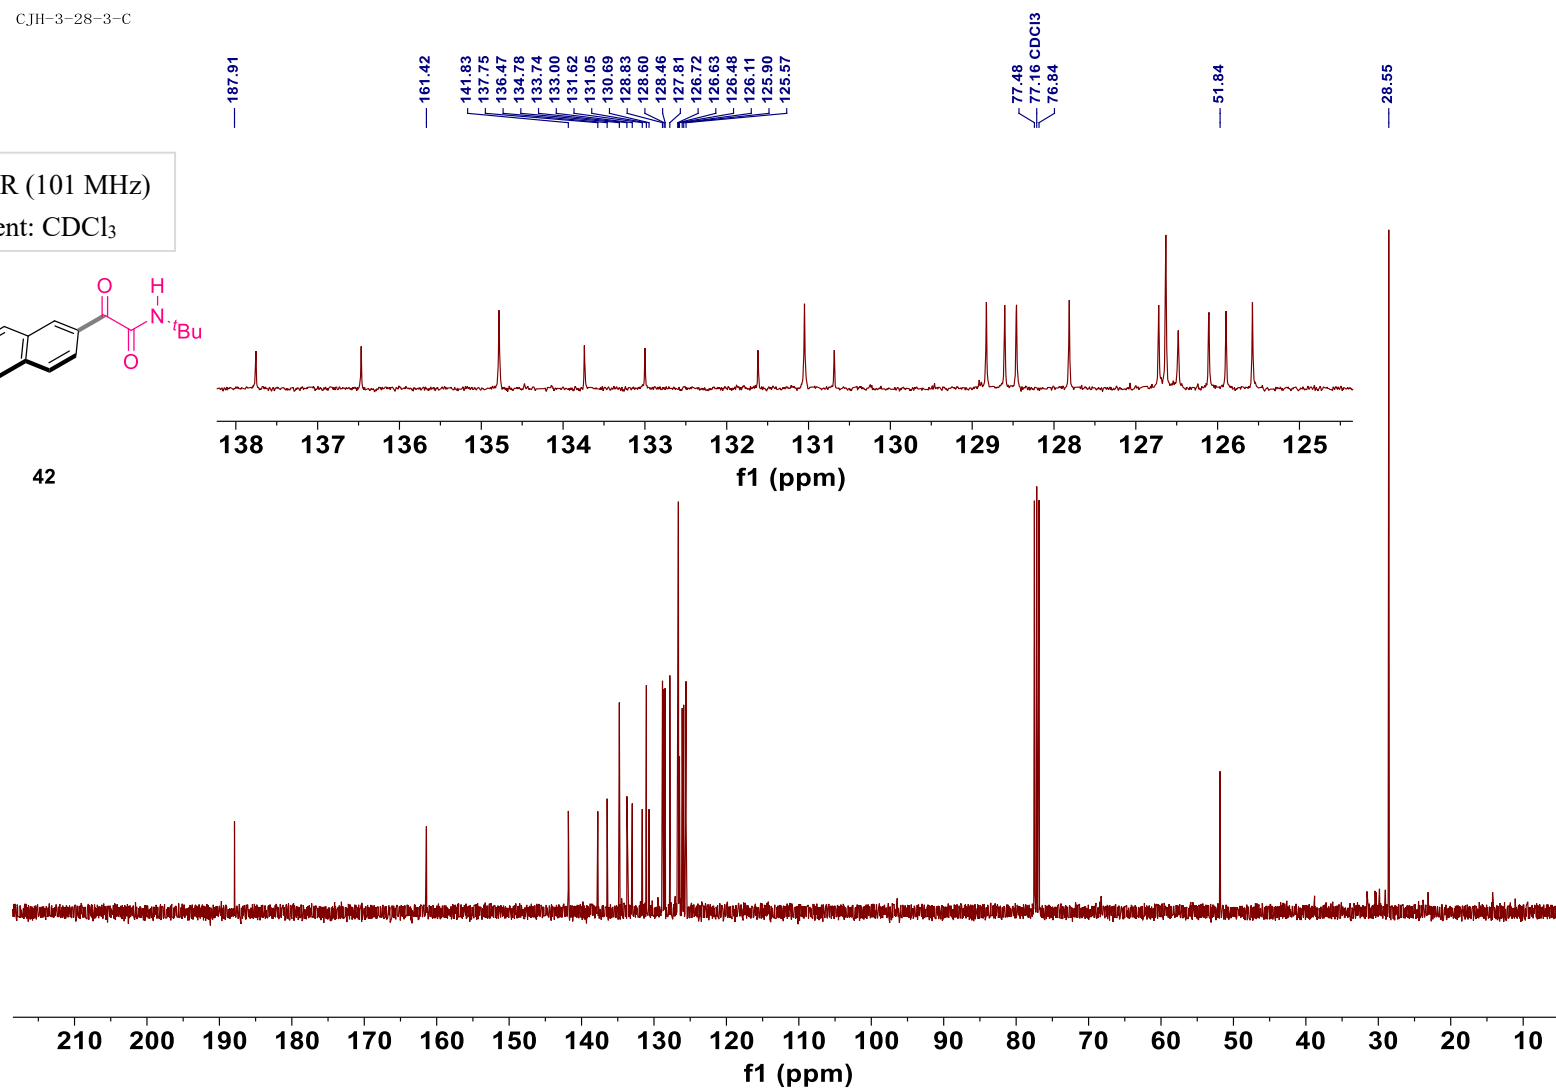

CJH-1-186-1-H

<sup>1</sup>H-NMR (400 MHz)  
Solvent: CDCl<sub>3</sub>

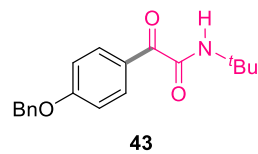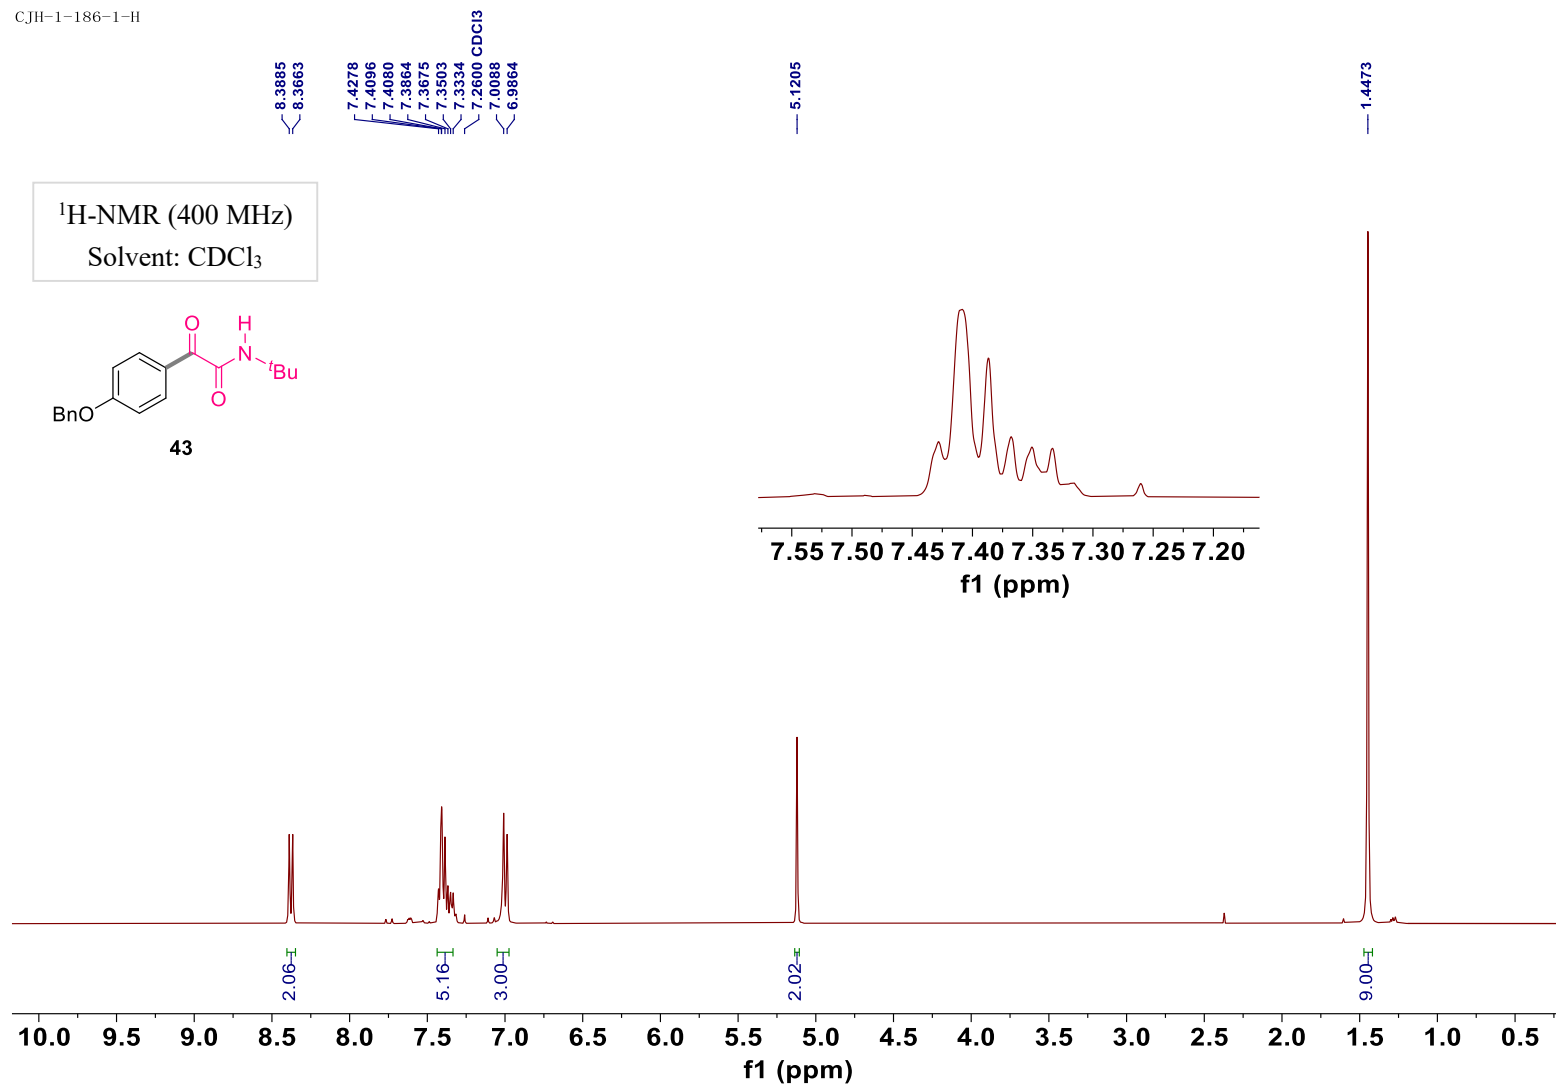



CJH-1-186-1-C

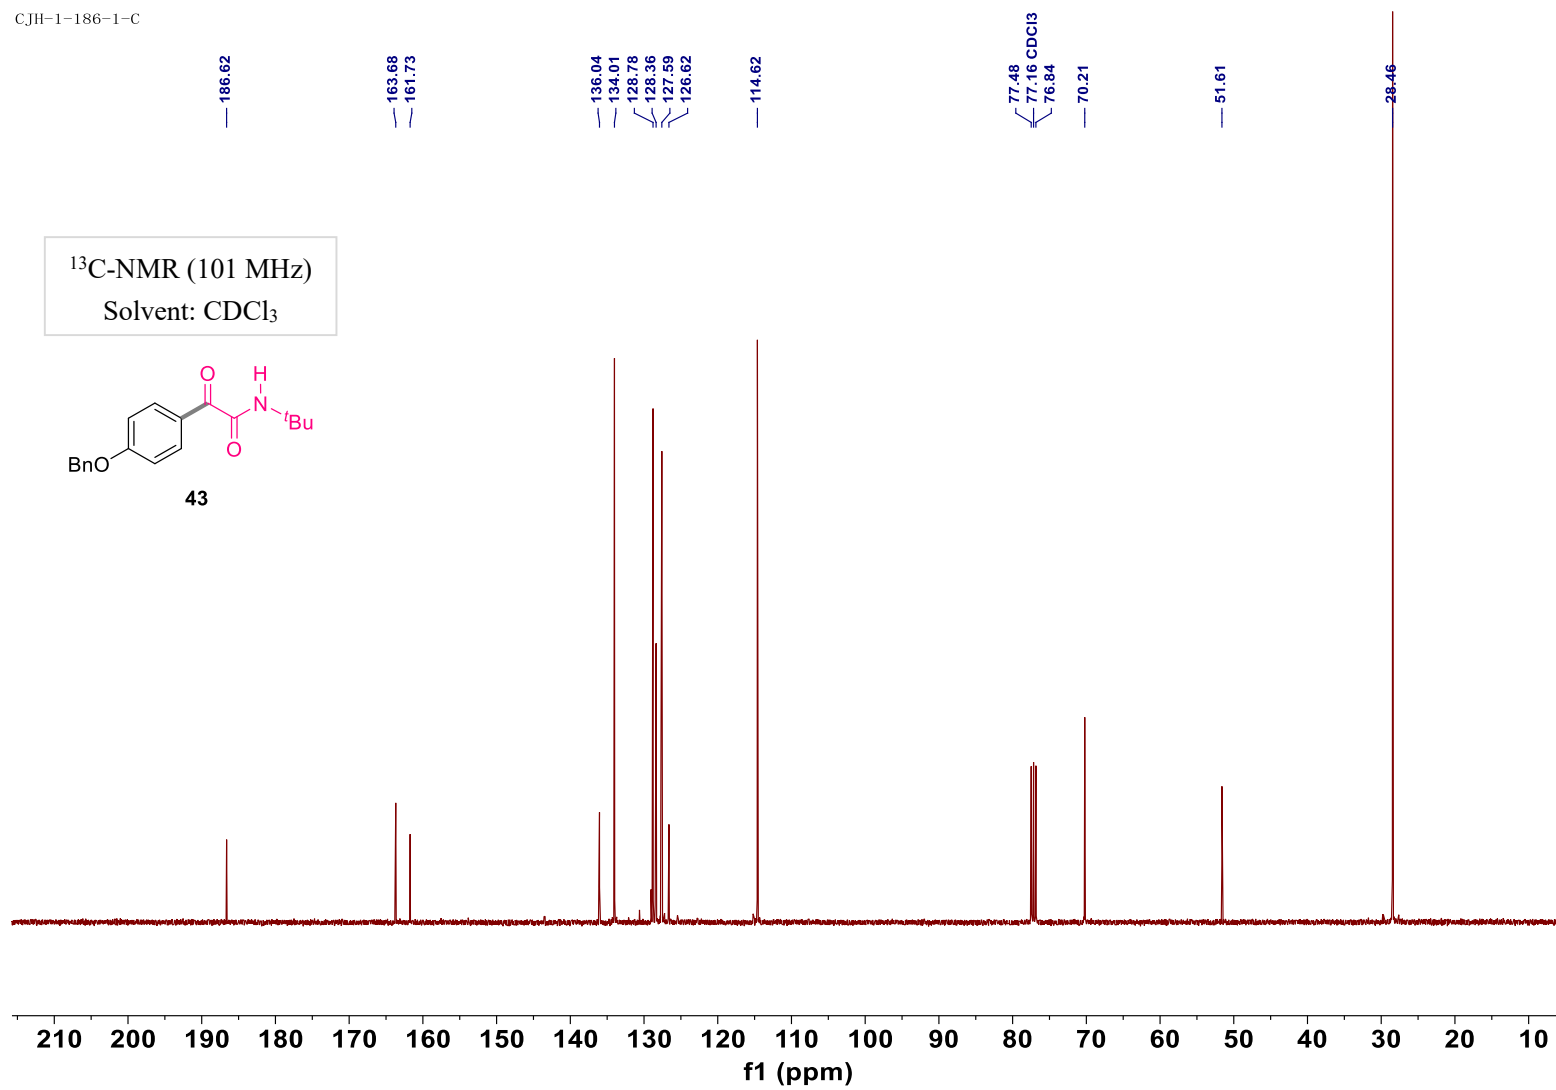

CJH-1-109-3-H

<sup>1</sup>H-NMR (400 MHz)  
Solvent: CDCl<sub>3</sub>

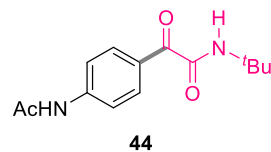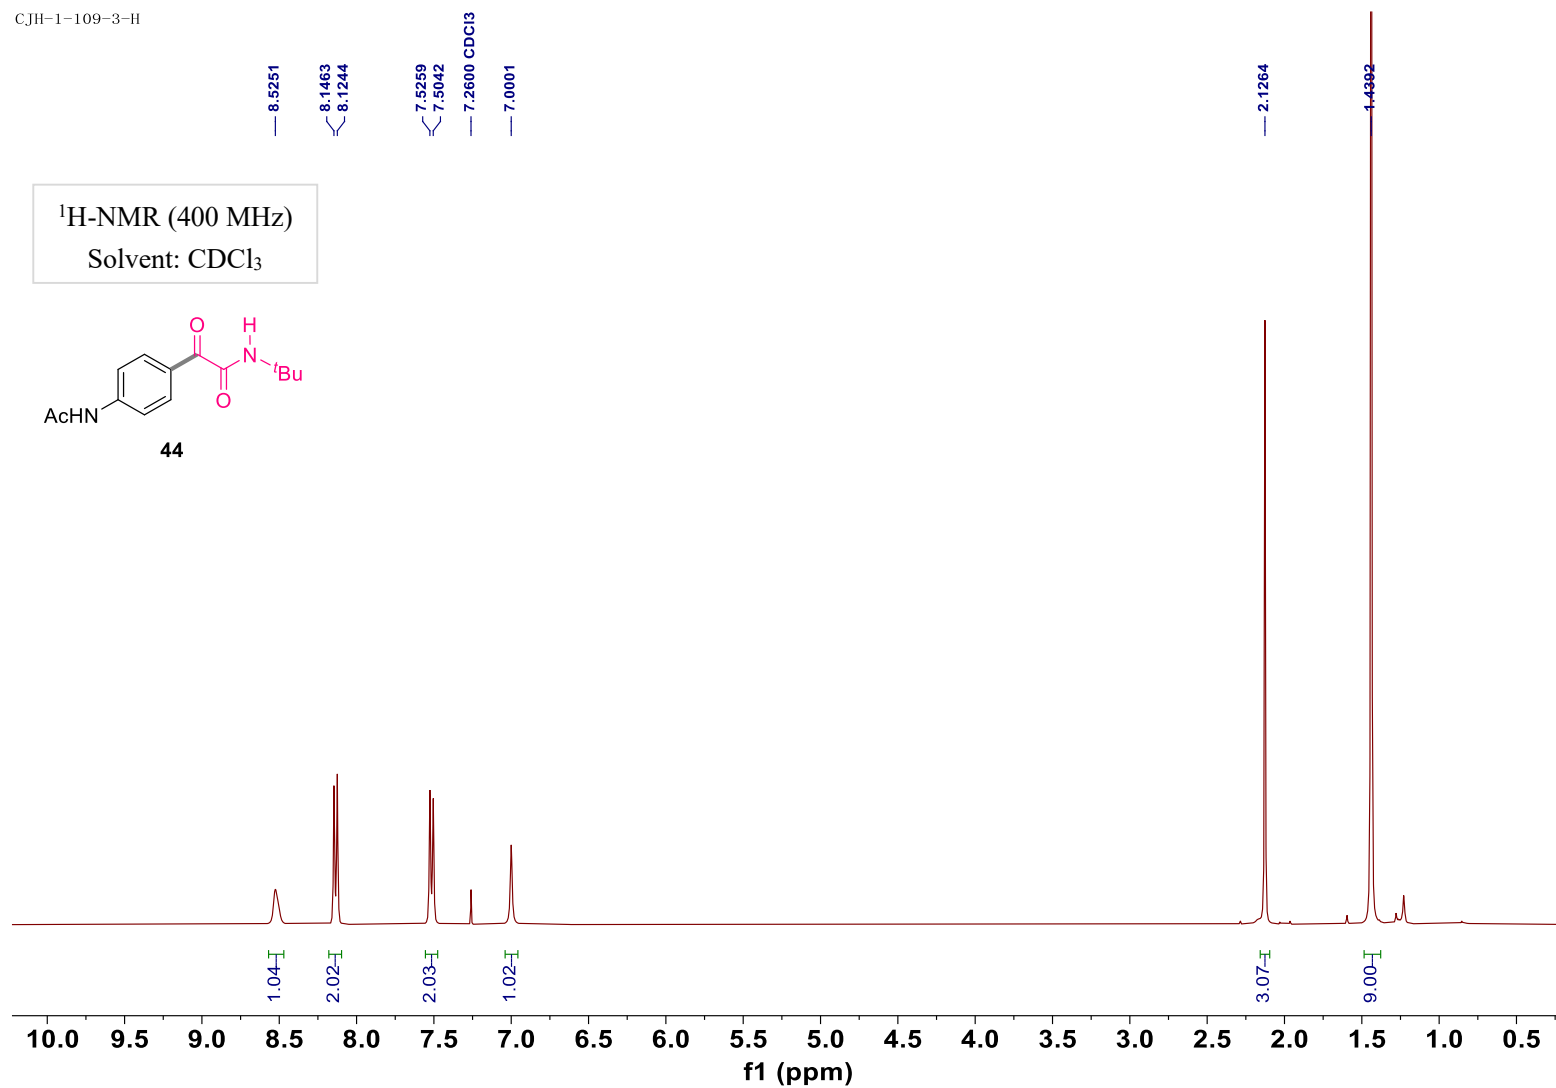

CJH-1-109-3-C

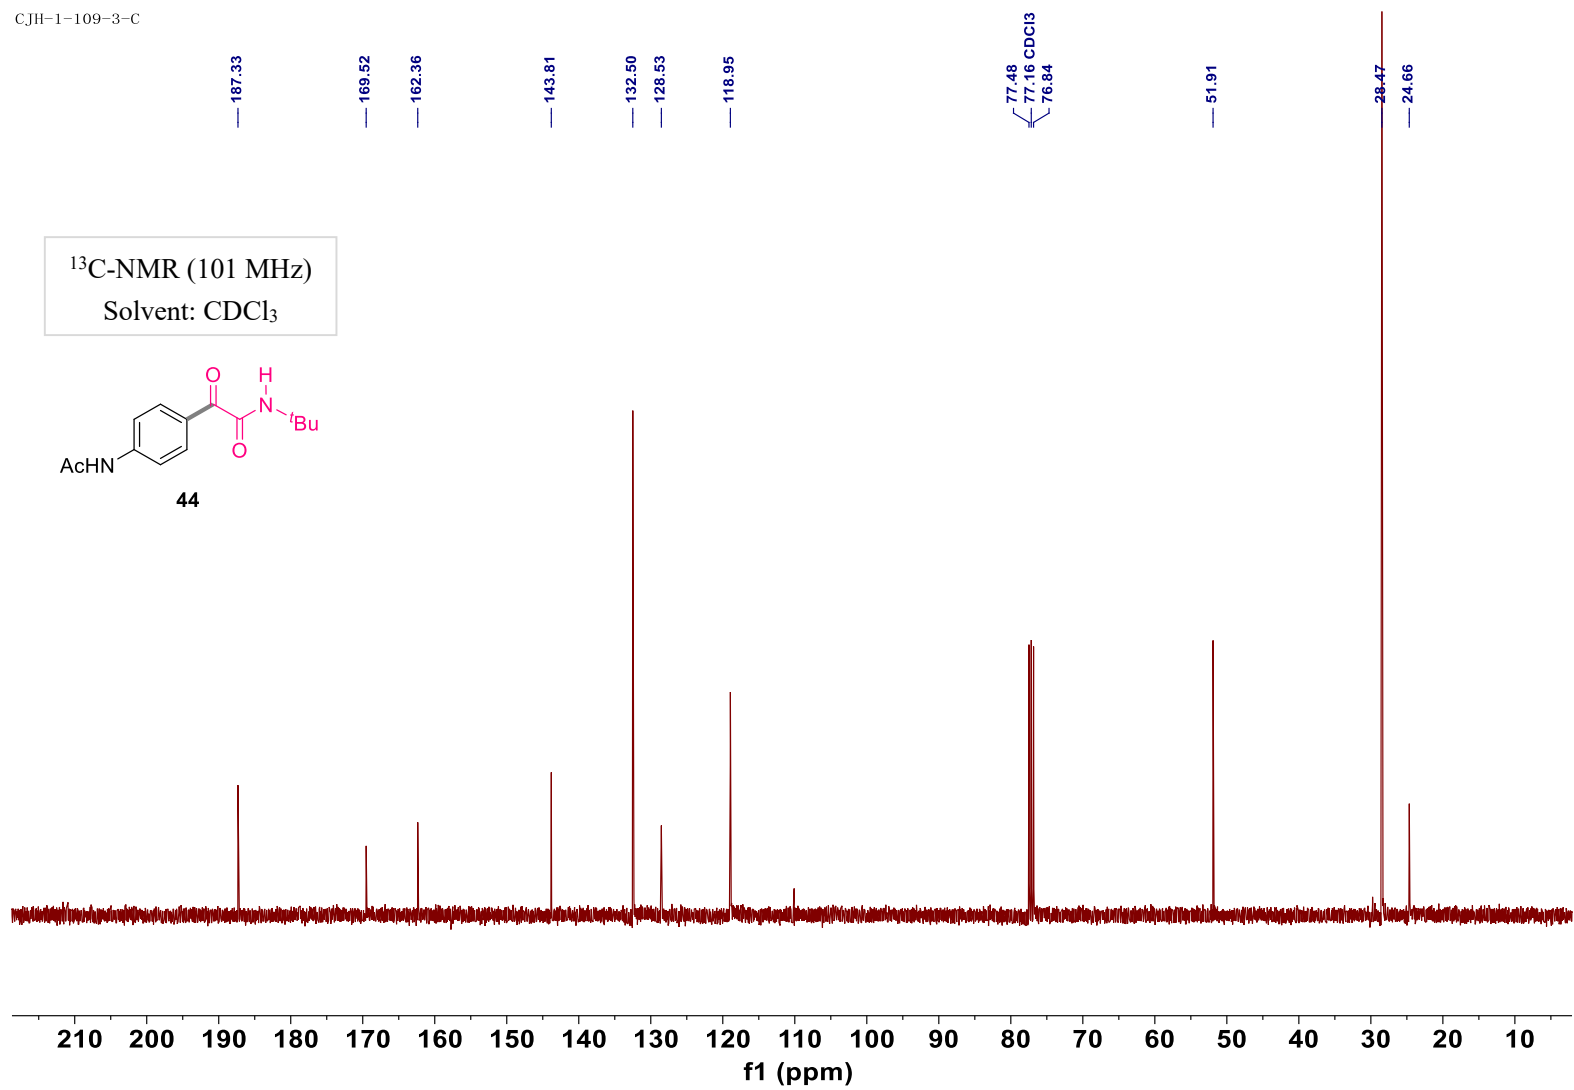

S164

CJH-1-104-1-H

<sup>1</sup>H-NMR (400 MHz)  
Solvent: CDCl<sub>3</sub>

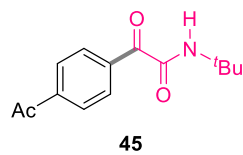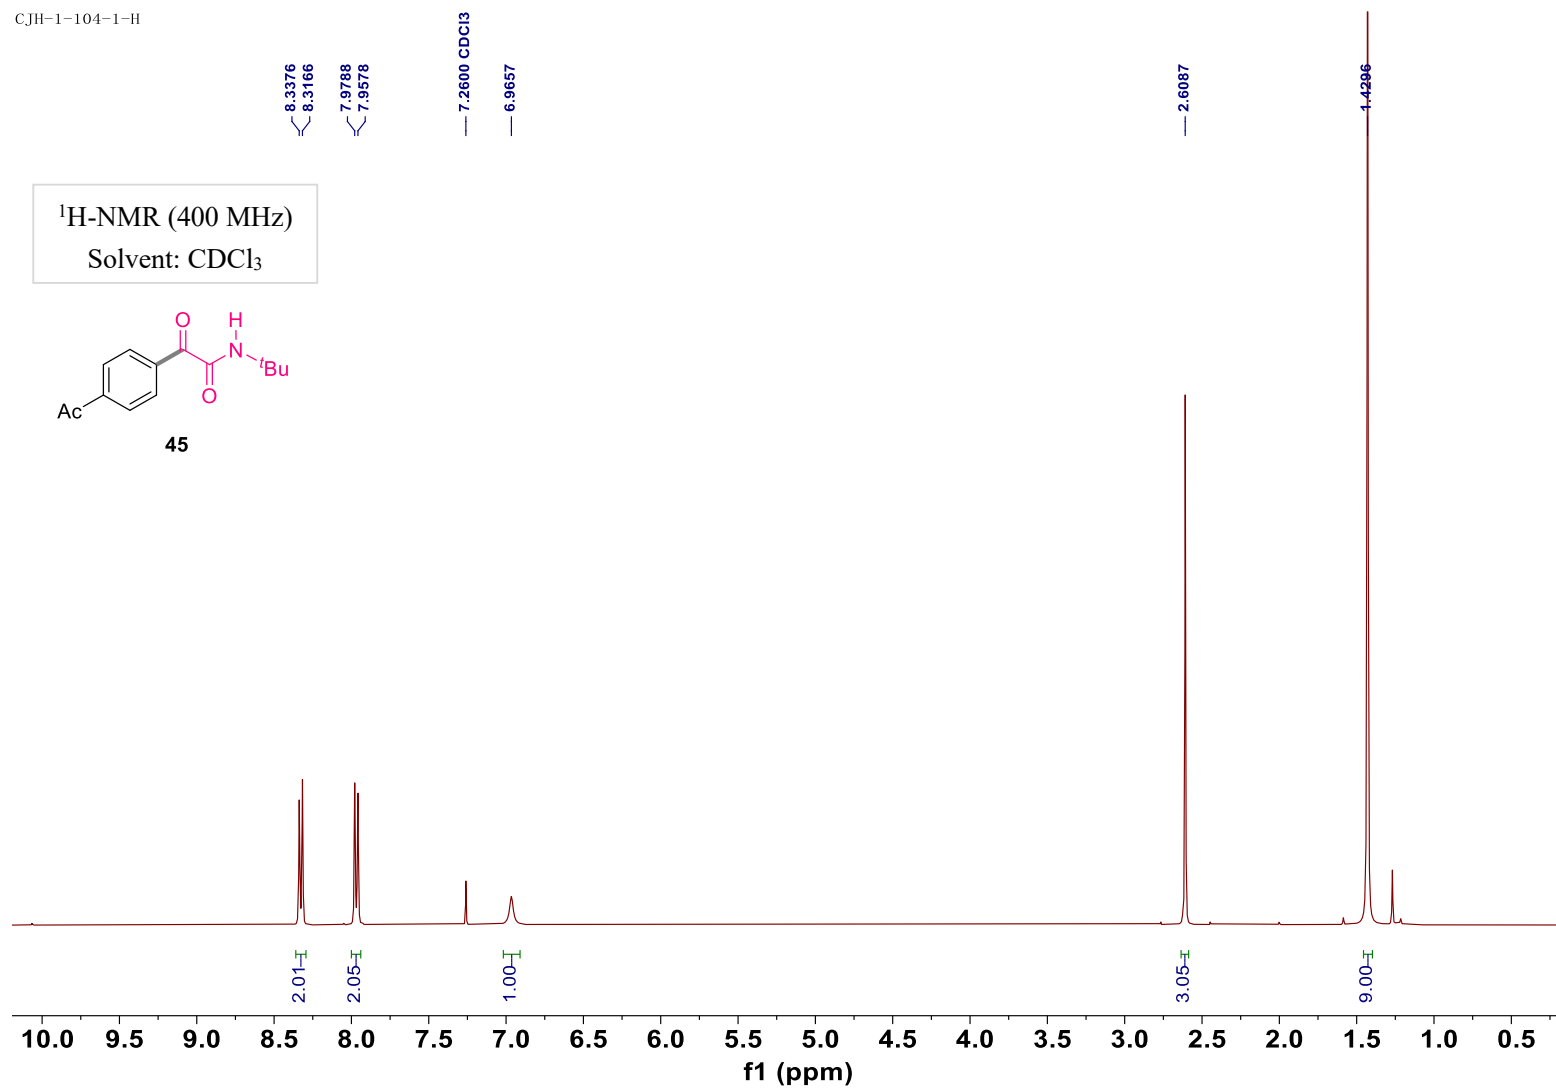

CJH-1-104-1-C

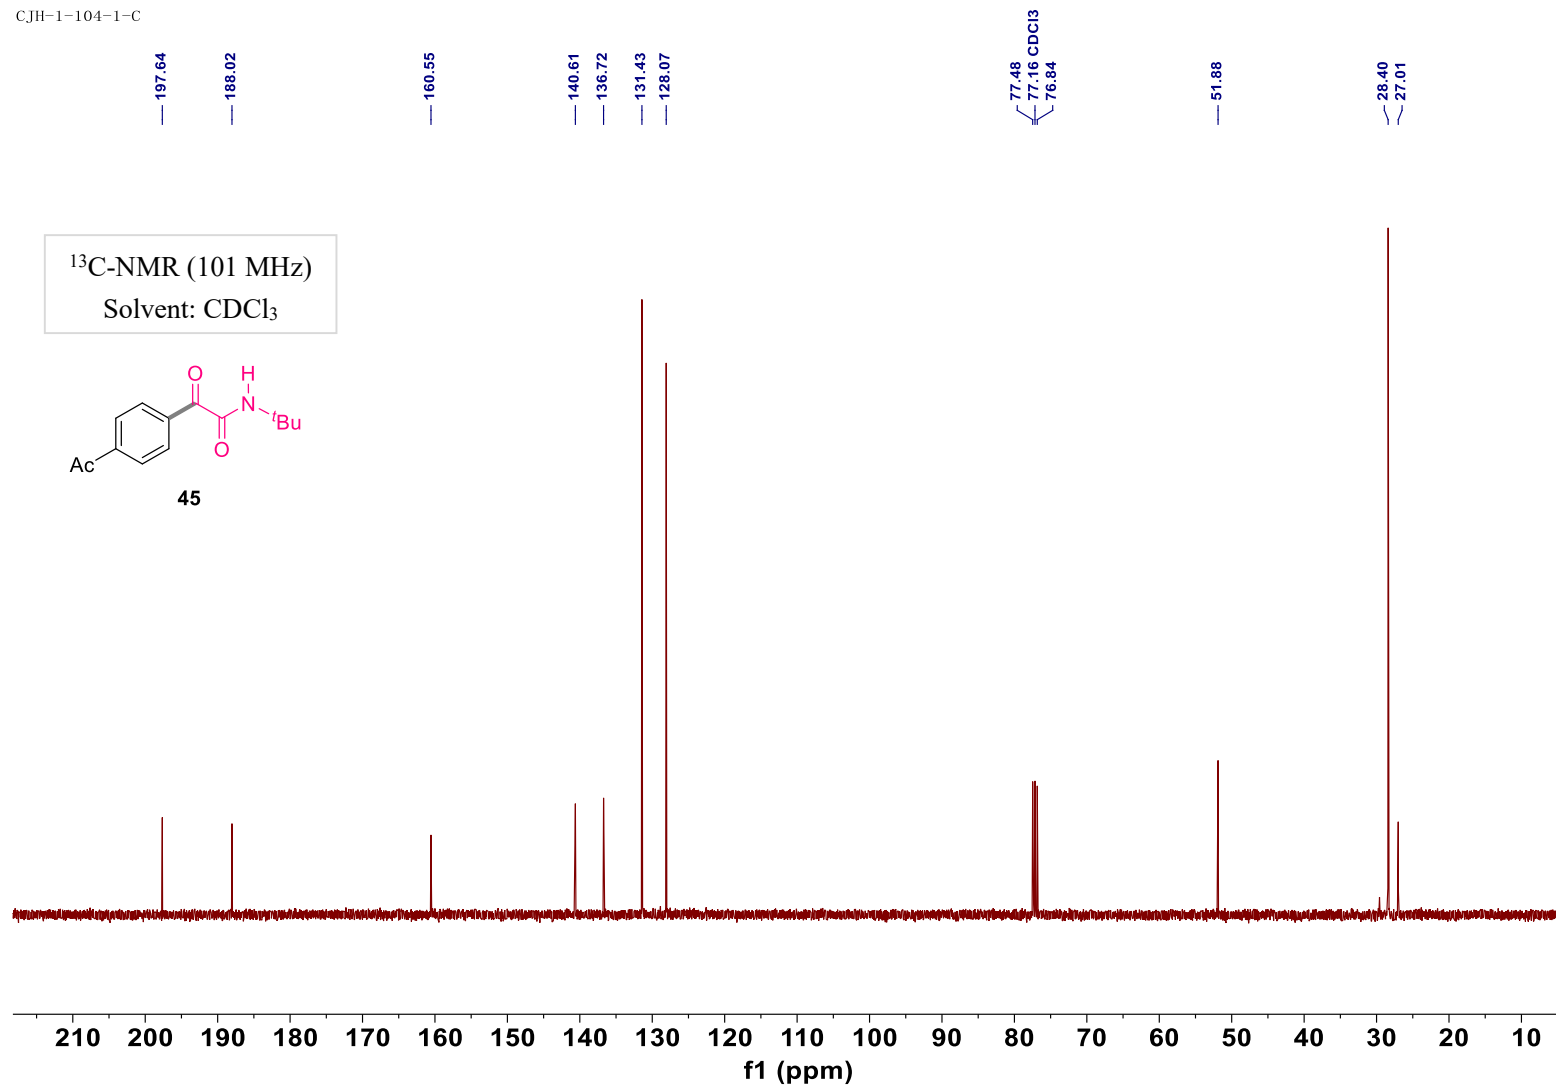

CJH-1-114-1-H

8.3269  
8.3057  
8.0830  
8.0617

7.2600 CDCl<sub>3</sub>

6.9653

3.9177

1.4324

<sup>1</sup>H-NMR (400 MHz)  
Solvent: CDCl<sub>3</sub>

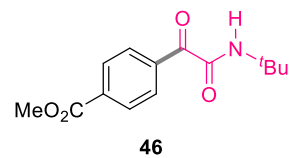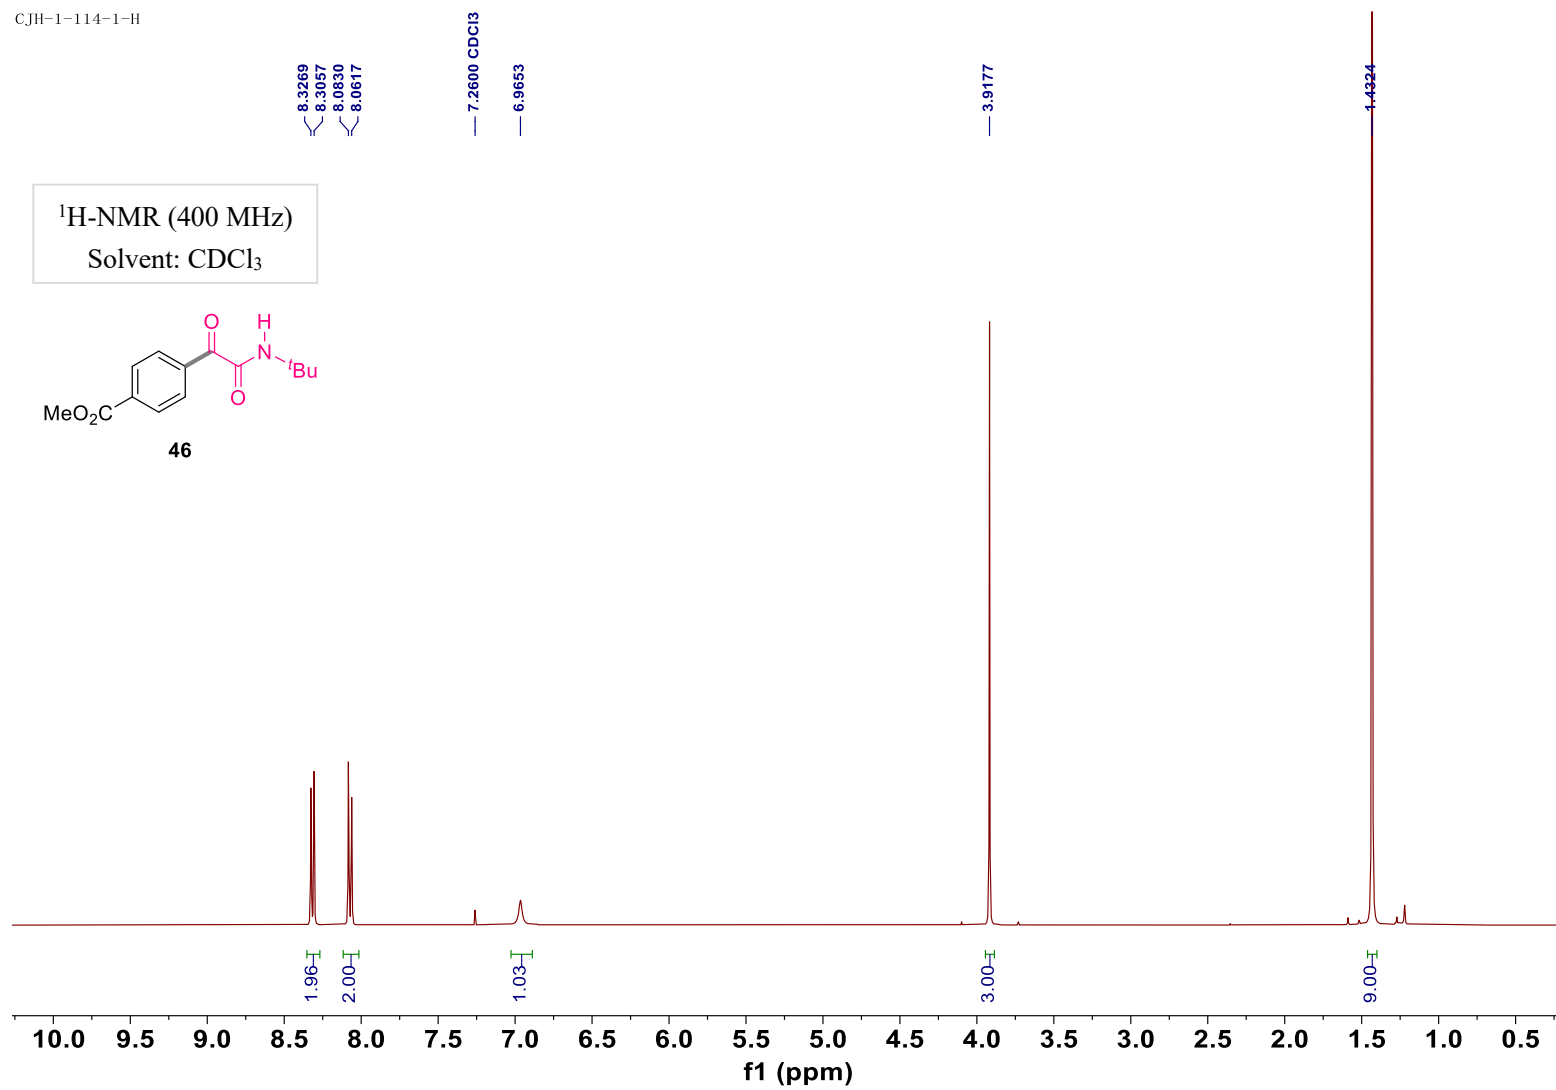

CJH-1-114-1-C

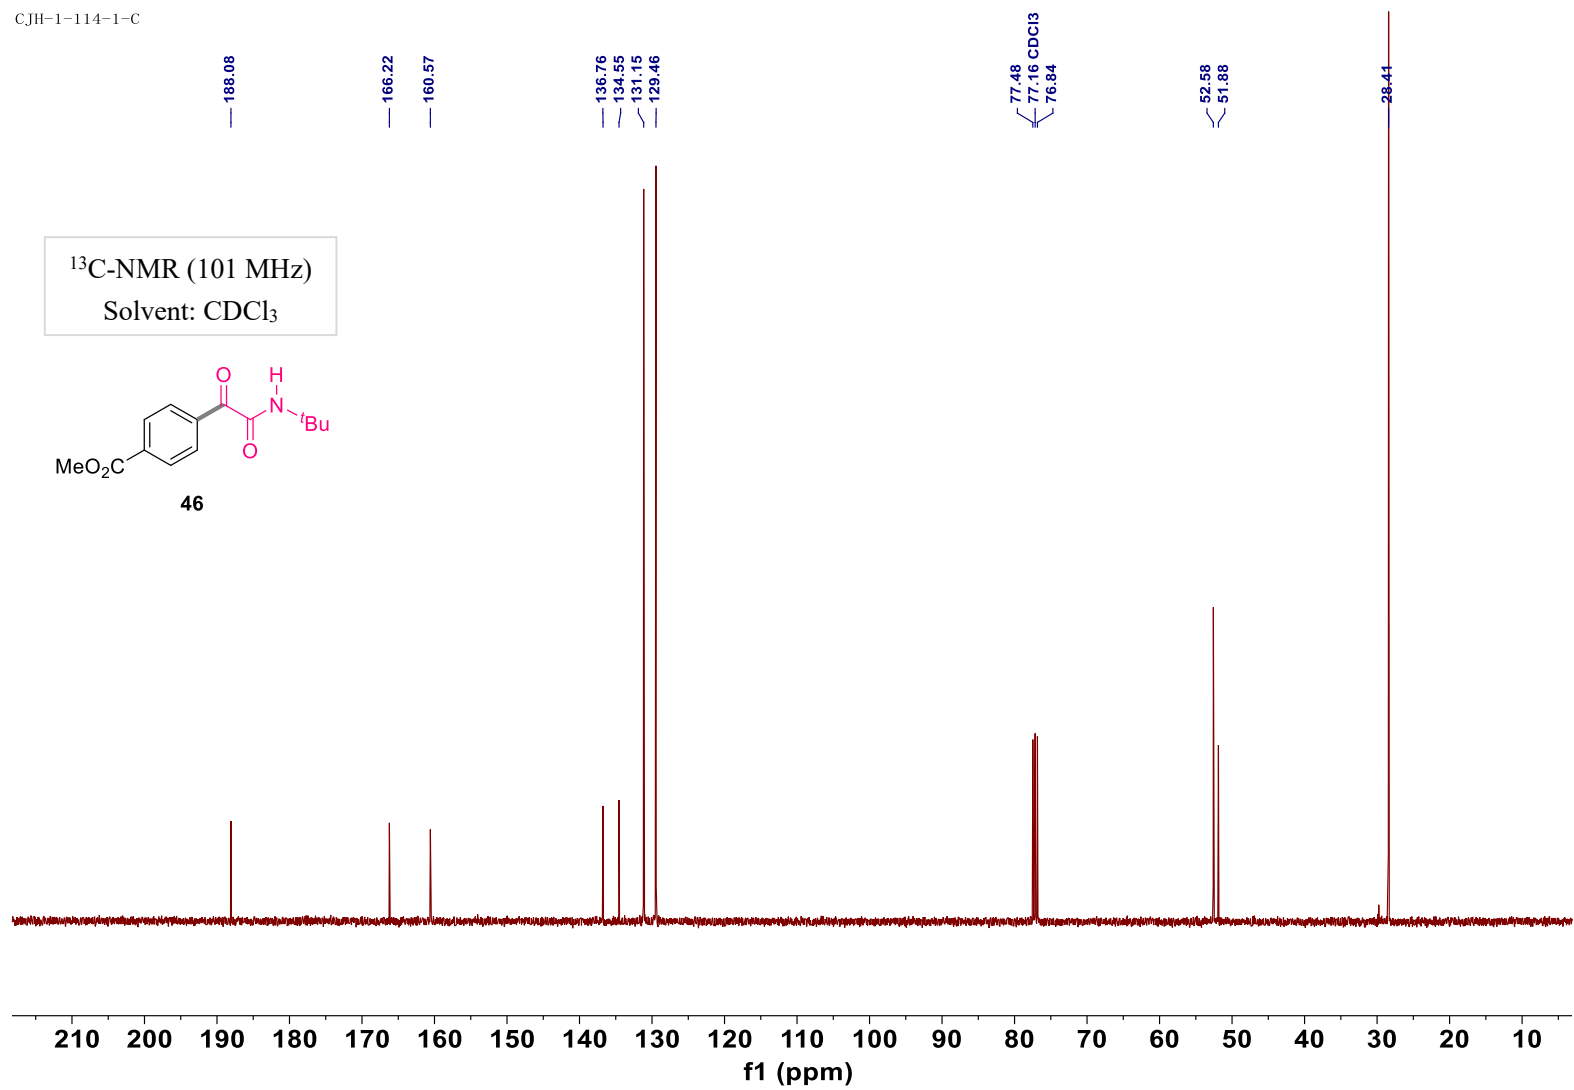

CJH-1-107-2-H

<sup>1</sup>H-NMR (400 MHz)  
Solvent: CDCl<sub>3</sub>

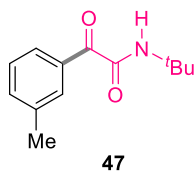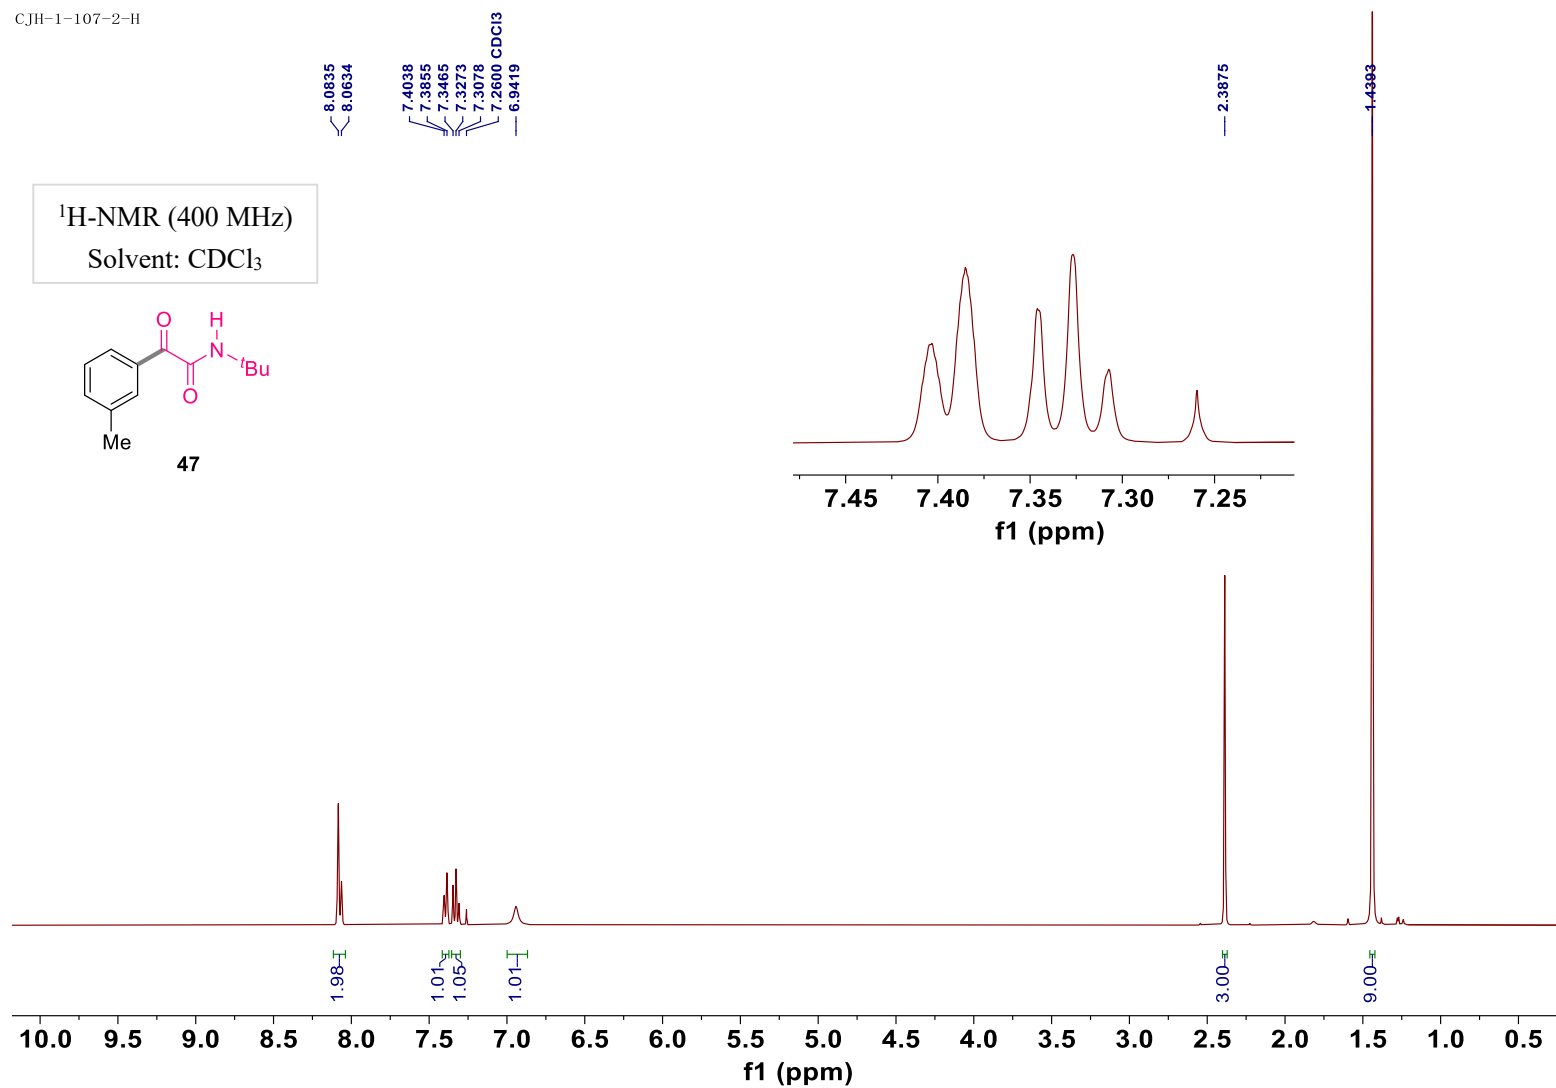



CJH-1-107-2-C

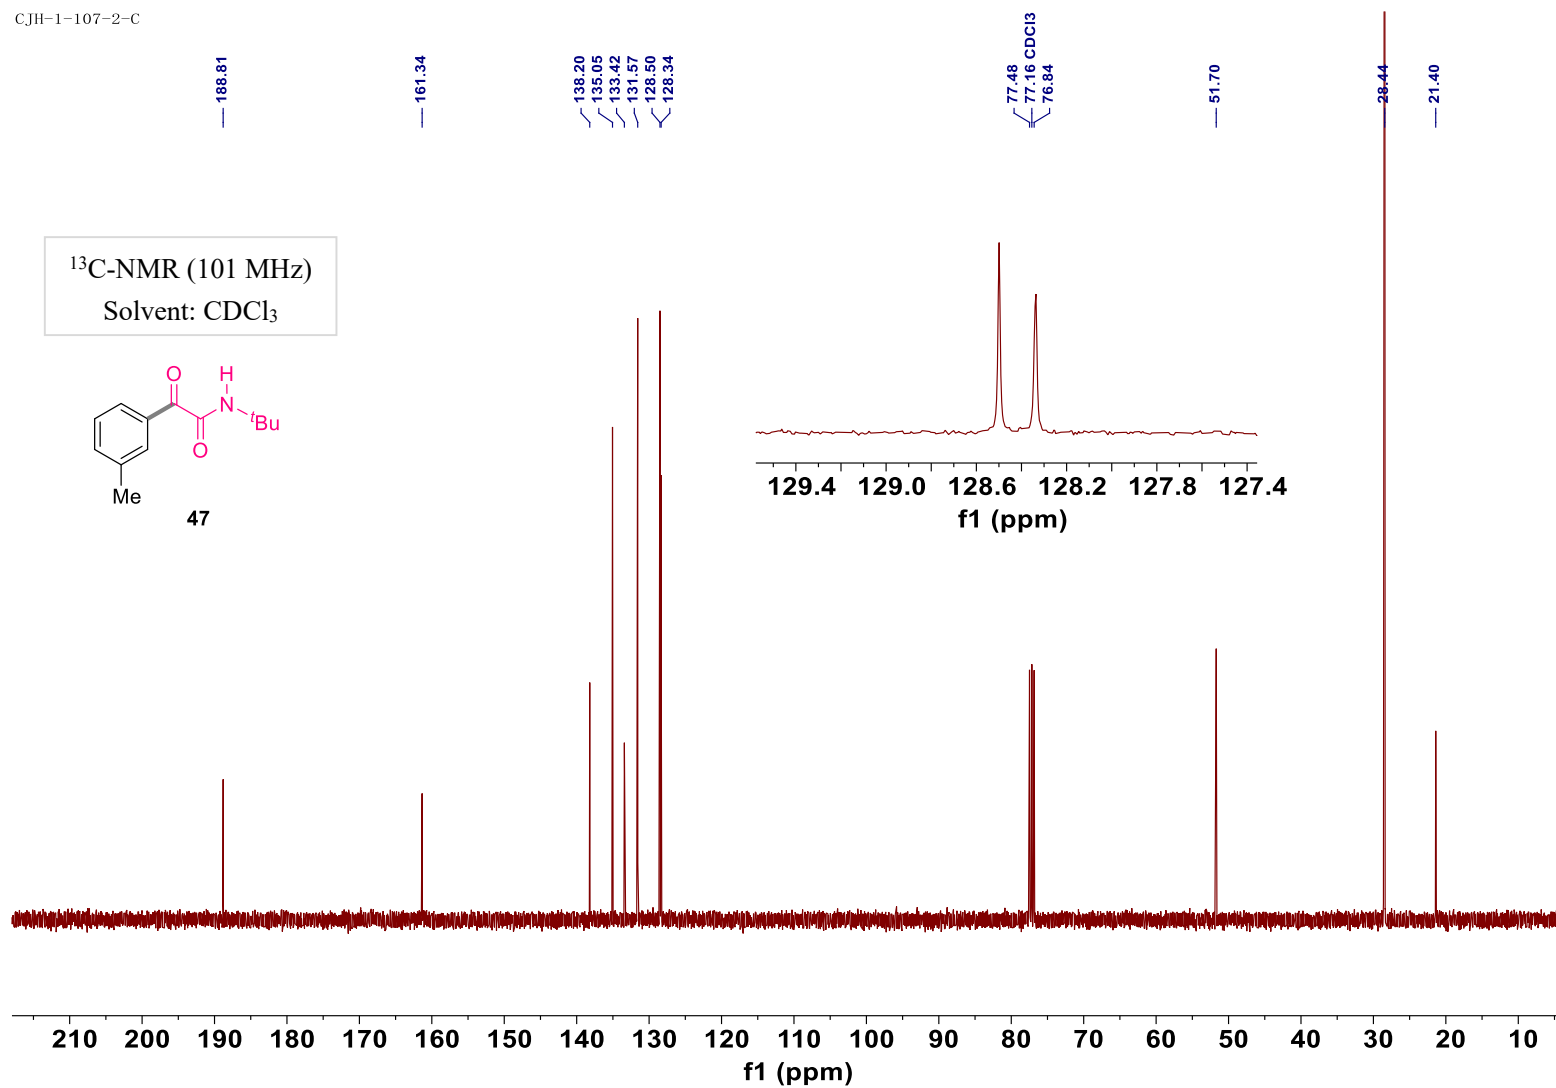

CJH-1-107-3-H

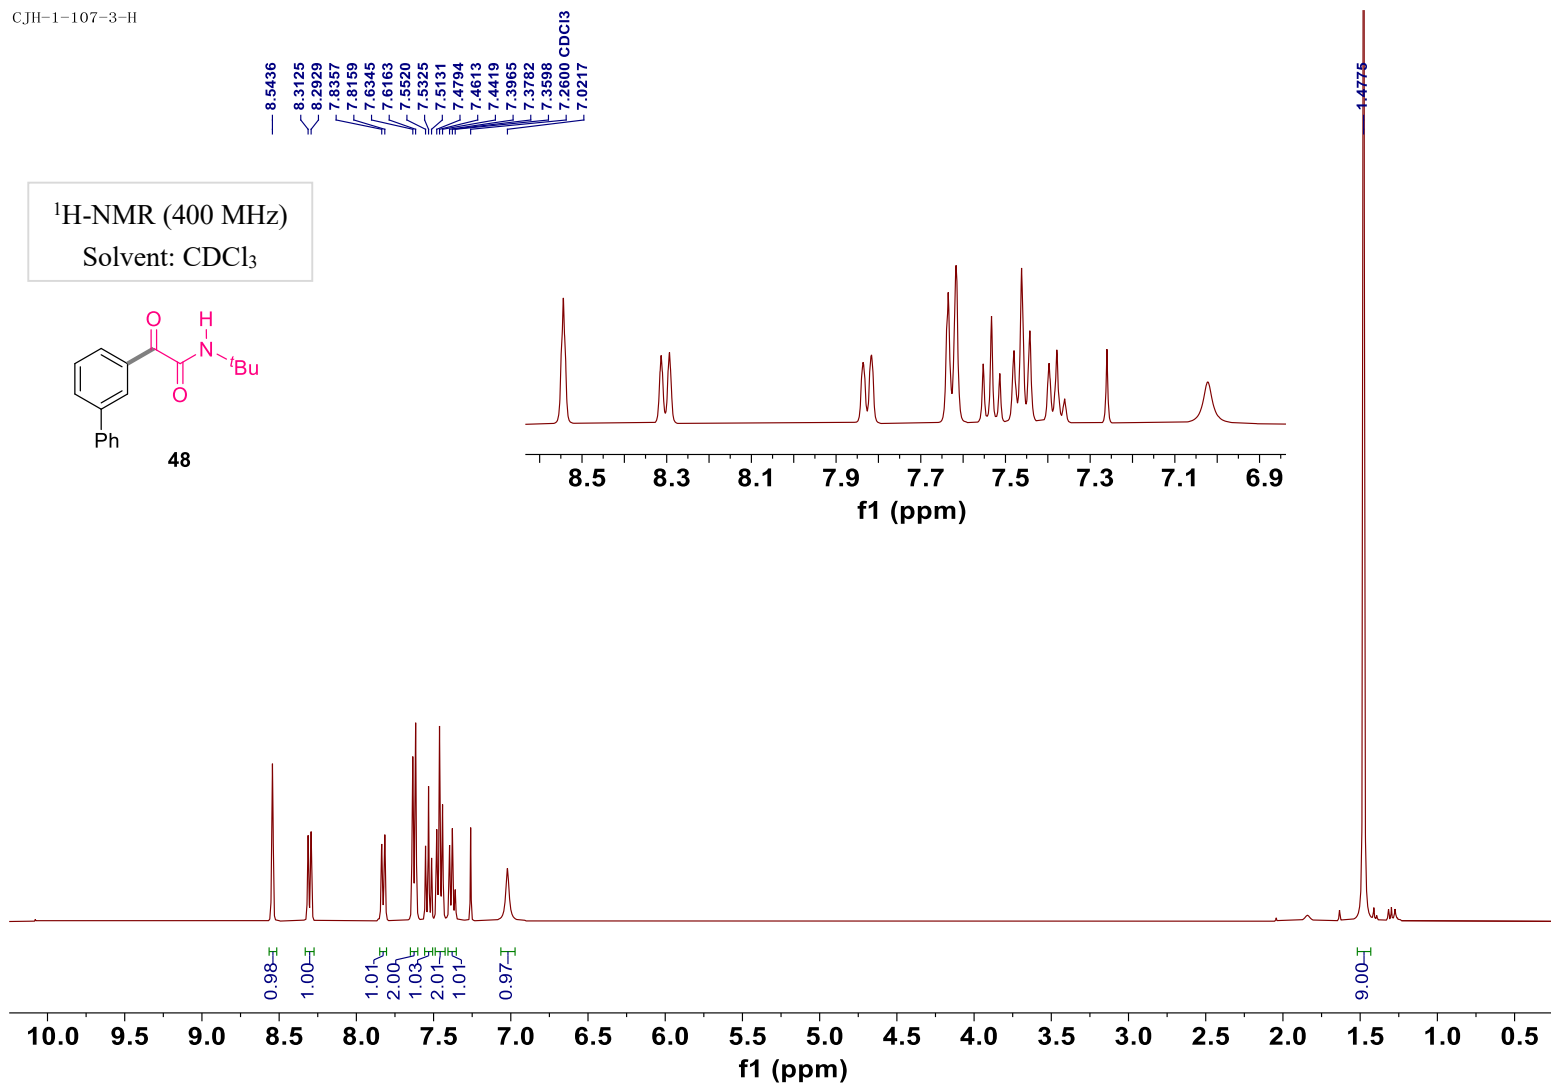

CJH-1-107-3-C

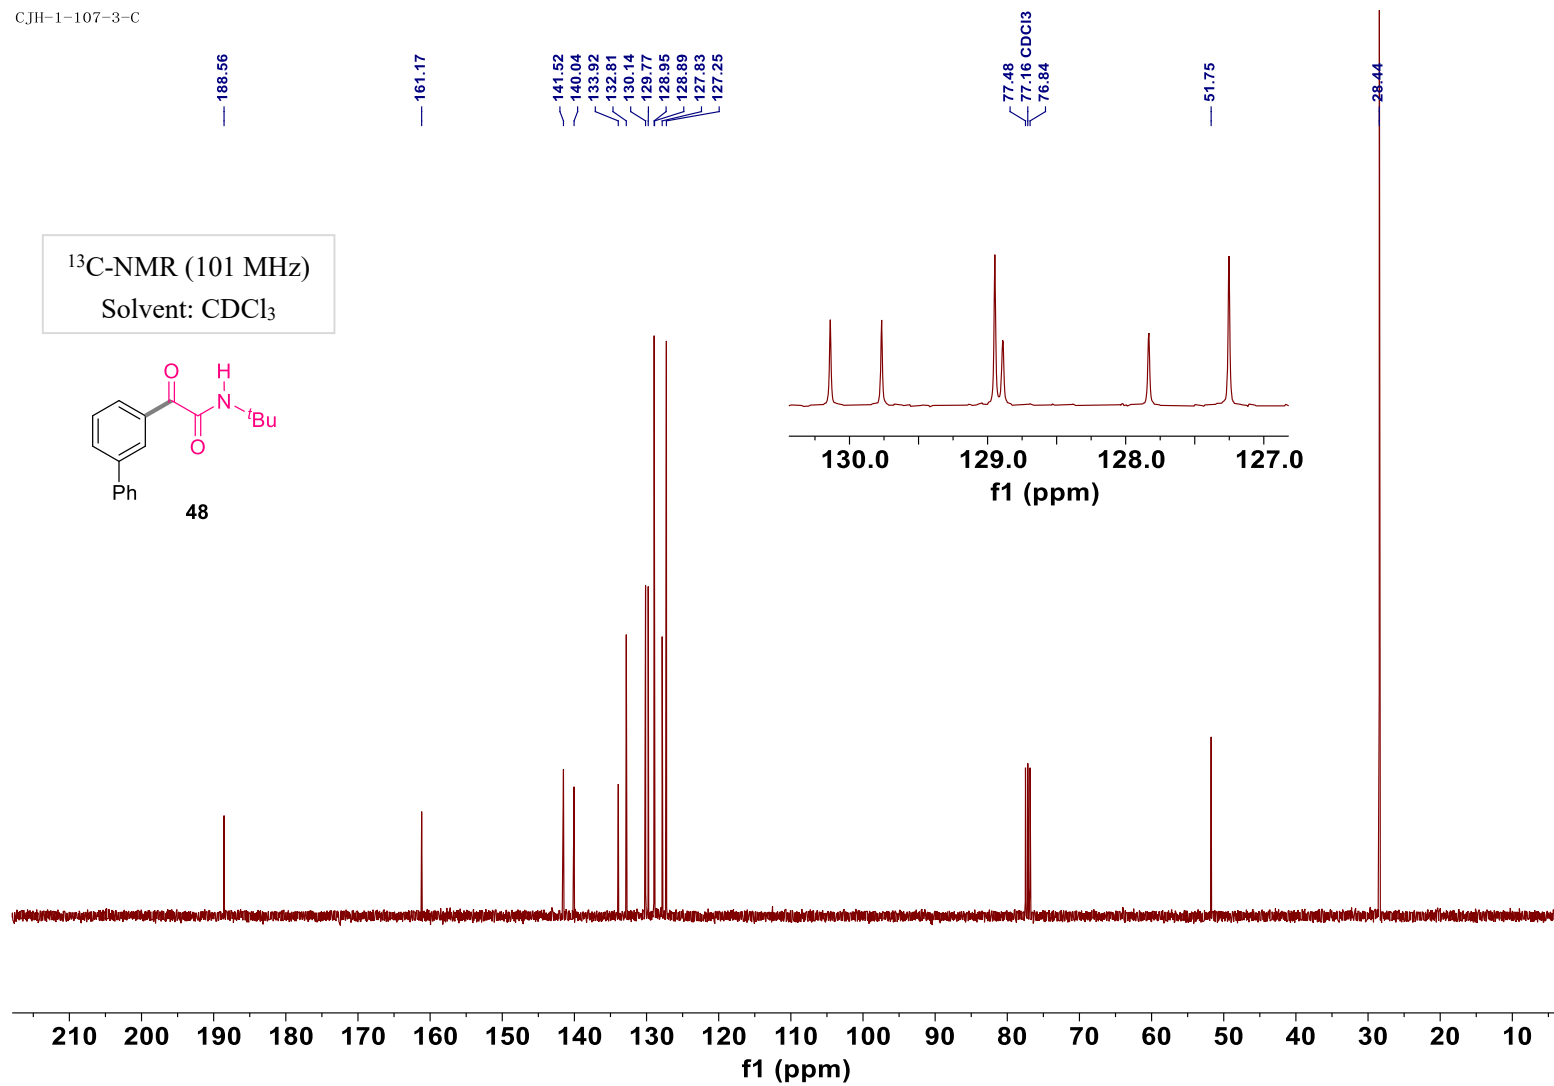

CJH-1-108-3-H

<sup>1</sup>H-NMR (400 MHz)

Solvent: CDCl<sub>3</sub>

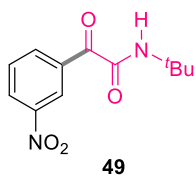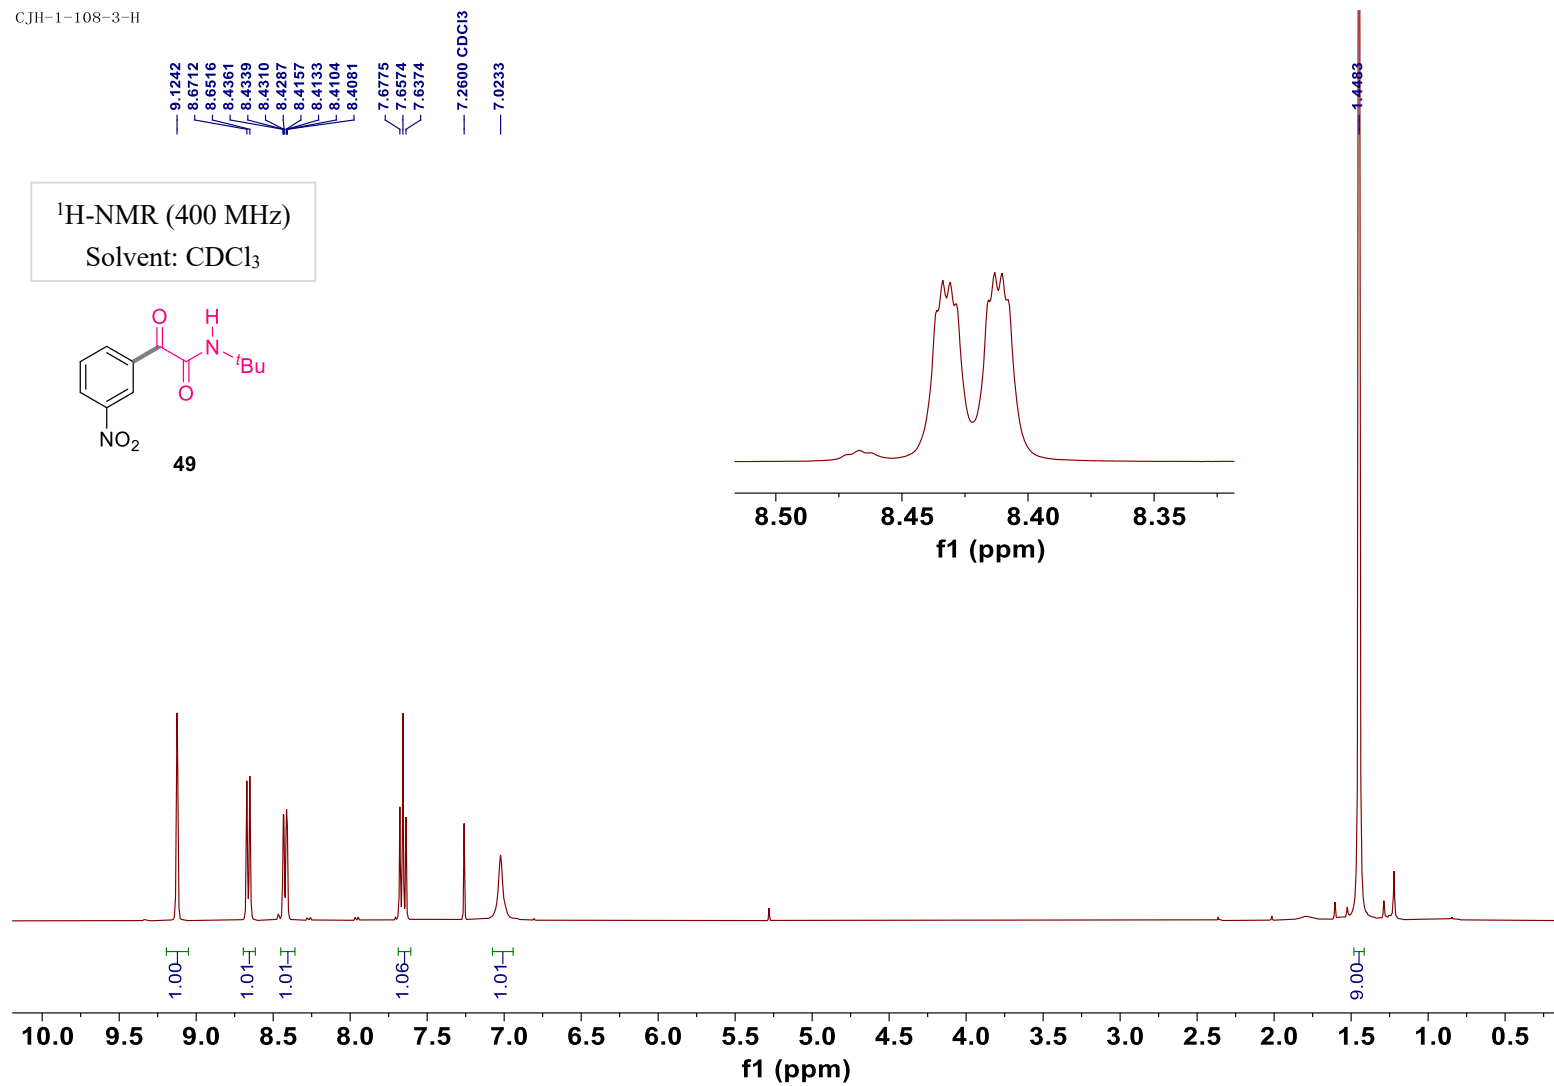

CJH-1-108-3-C

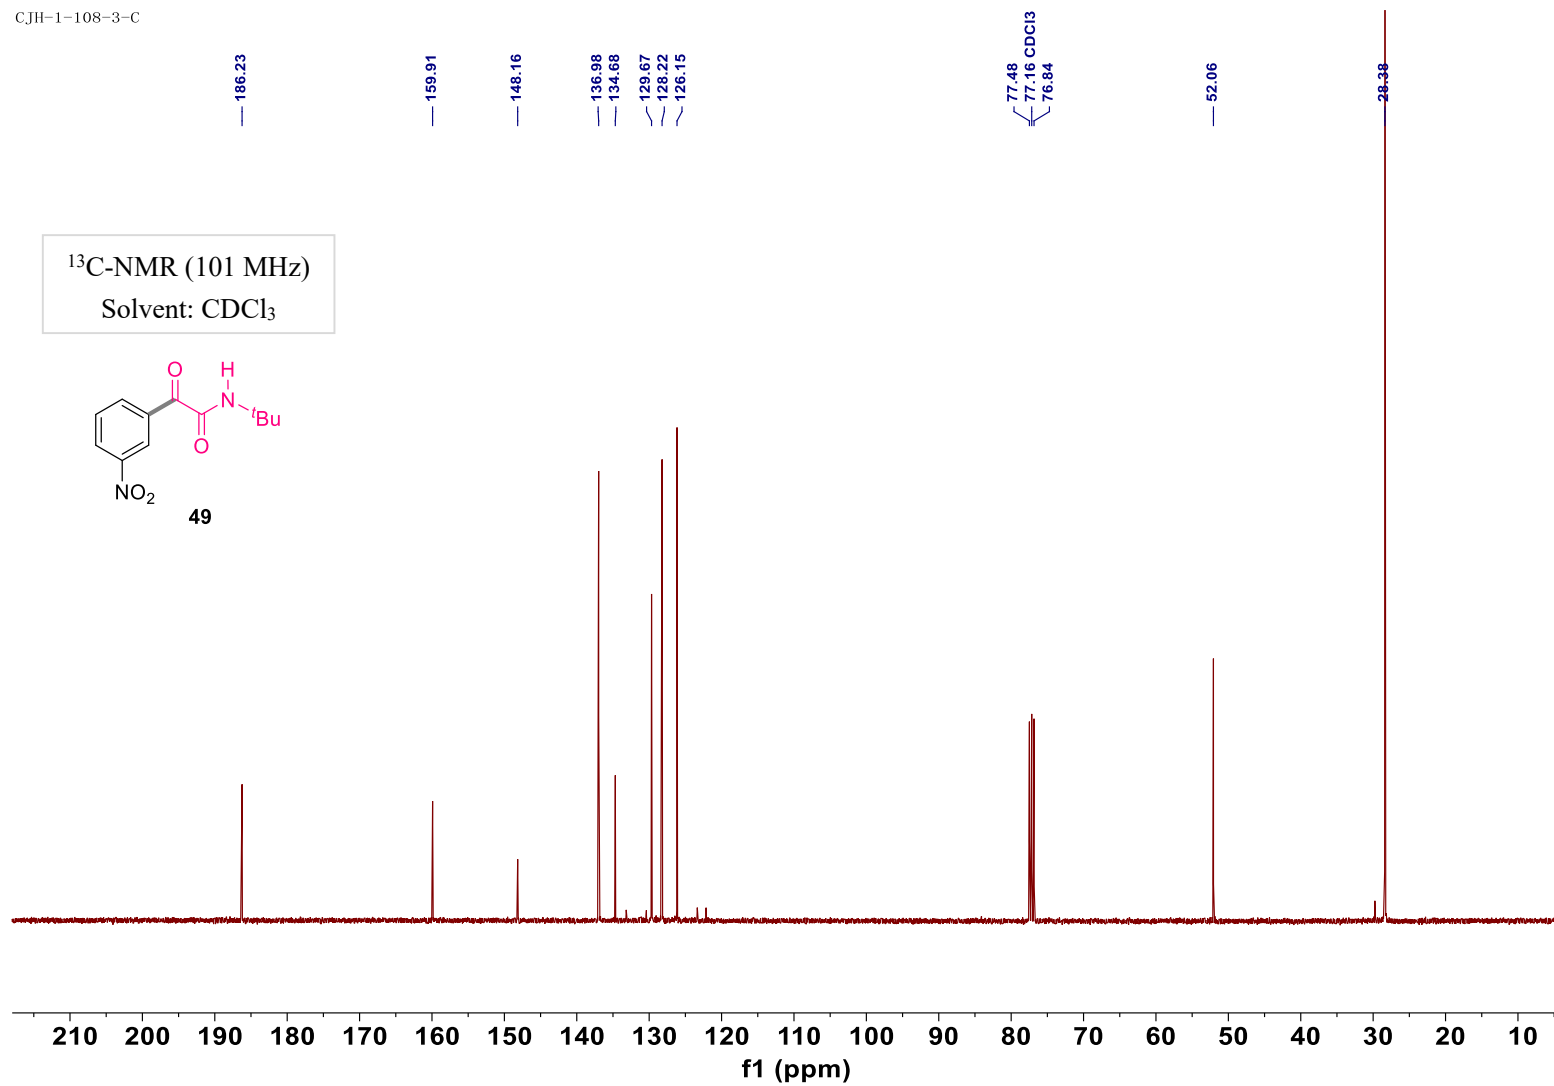

CJH-1-116-1-H

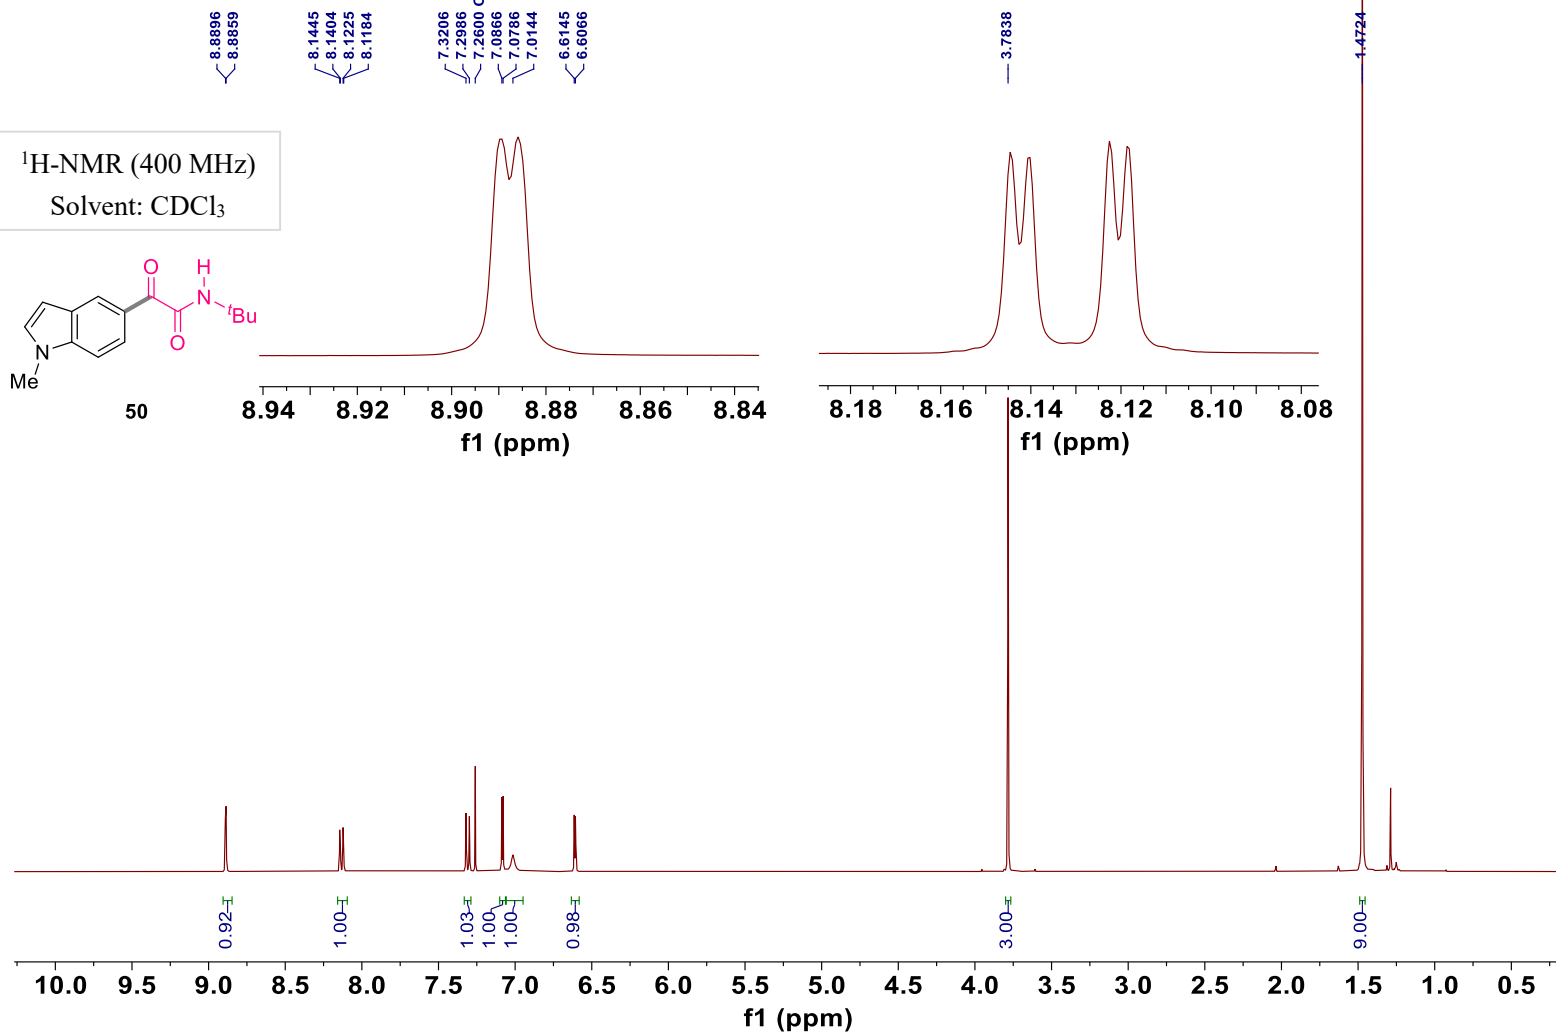

CJH-1-116-1-C

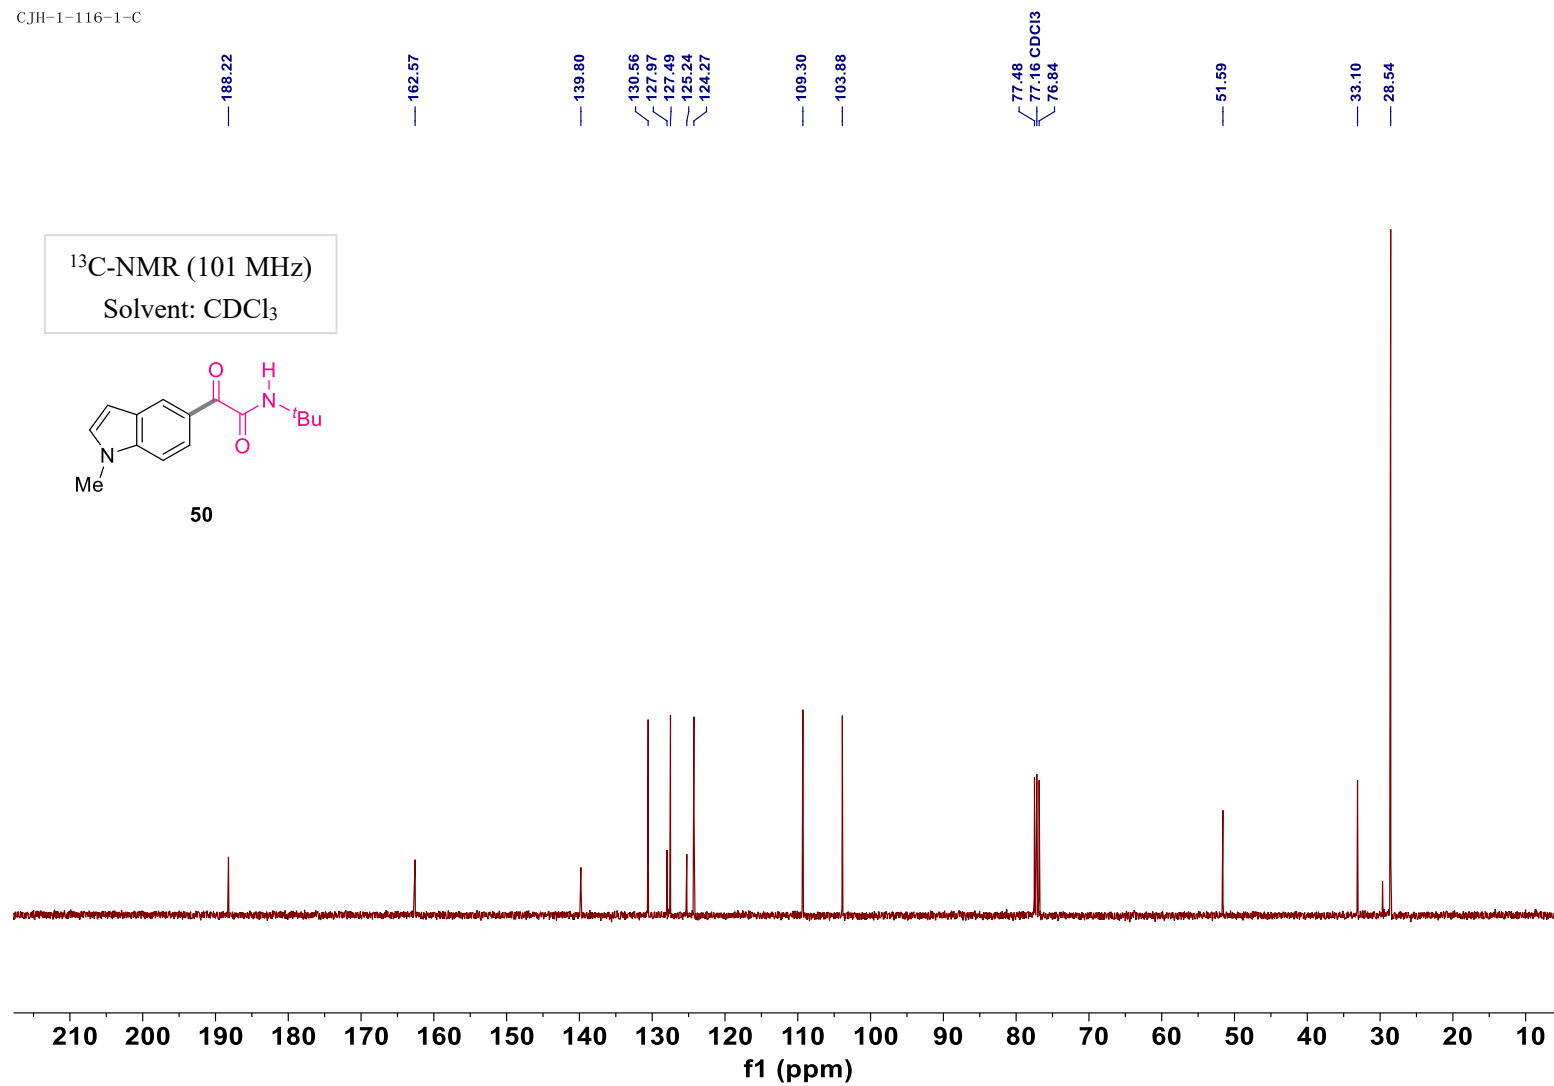

CJH-1-119-1-H

<sup>1</sup>H-NMR (400 MHz)  
Solvent: CDCl<sub>3</sub>

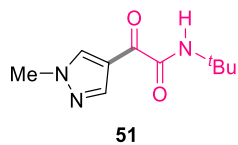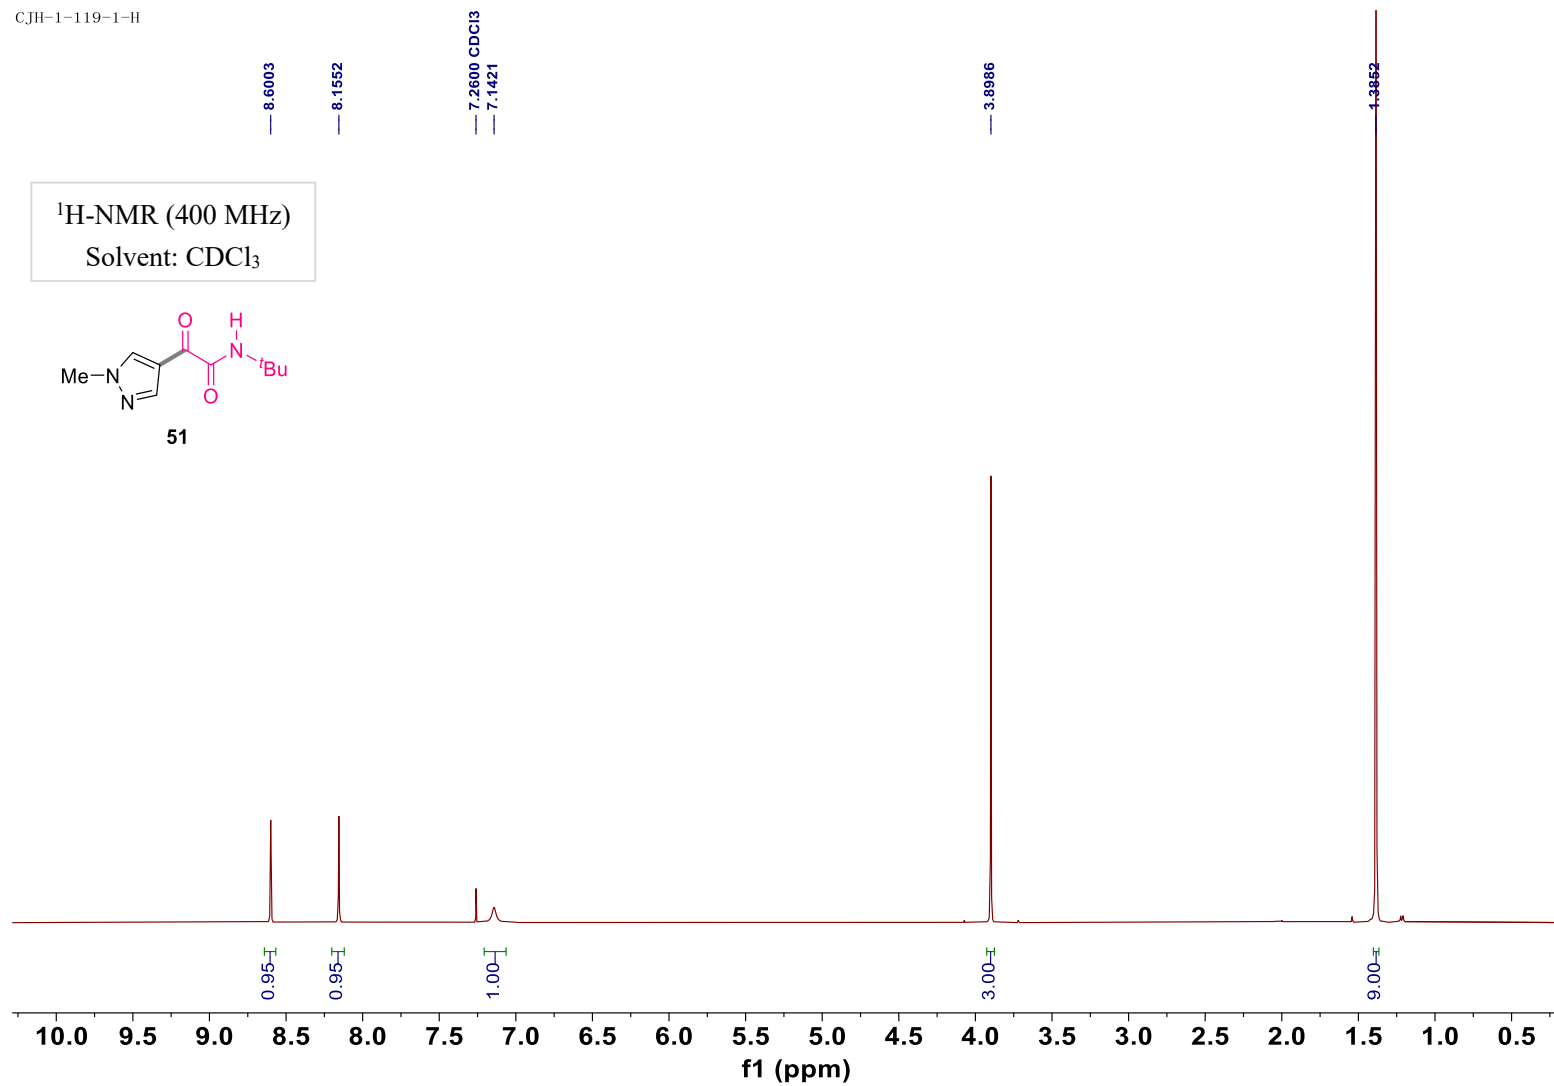



CJH-1-119-1-C

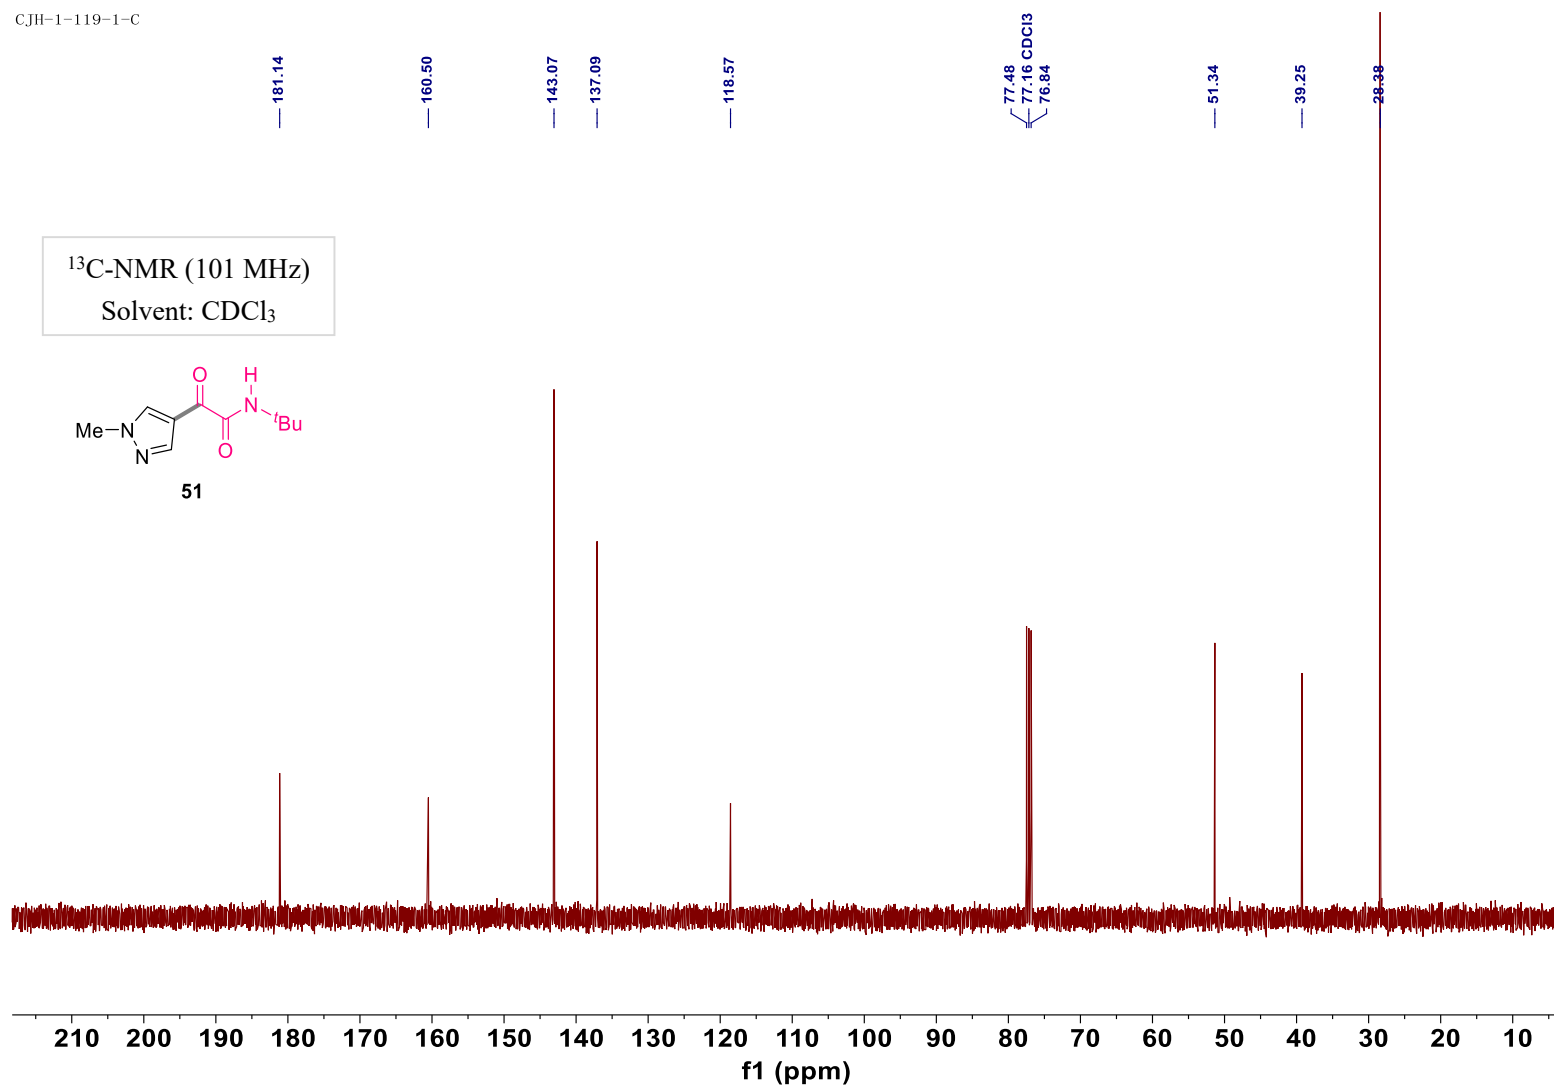

CJH-1-117-1-H

8.3497  
8.3482  
8.3404  
8.3385  
7.8132  
7.8108  
7.8010  
7.7985  
7.2600 CDCl<sub>3</sub>  
7.1939  
7.1761  
7.1645  
7.1539

<sup>1</sup>H-NMR (400 MHz)

Solvent: CDCl<sub>3</sub>

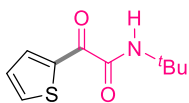

52

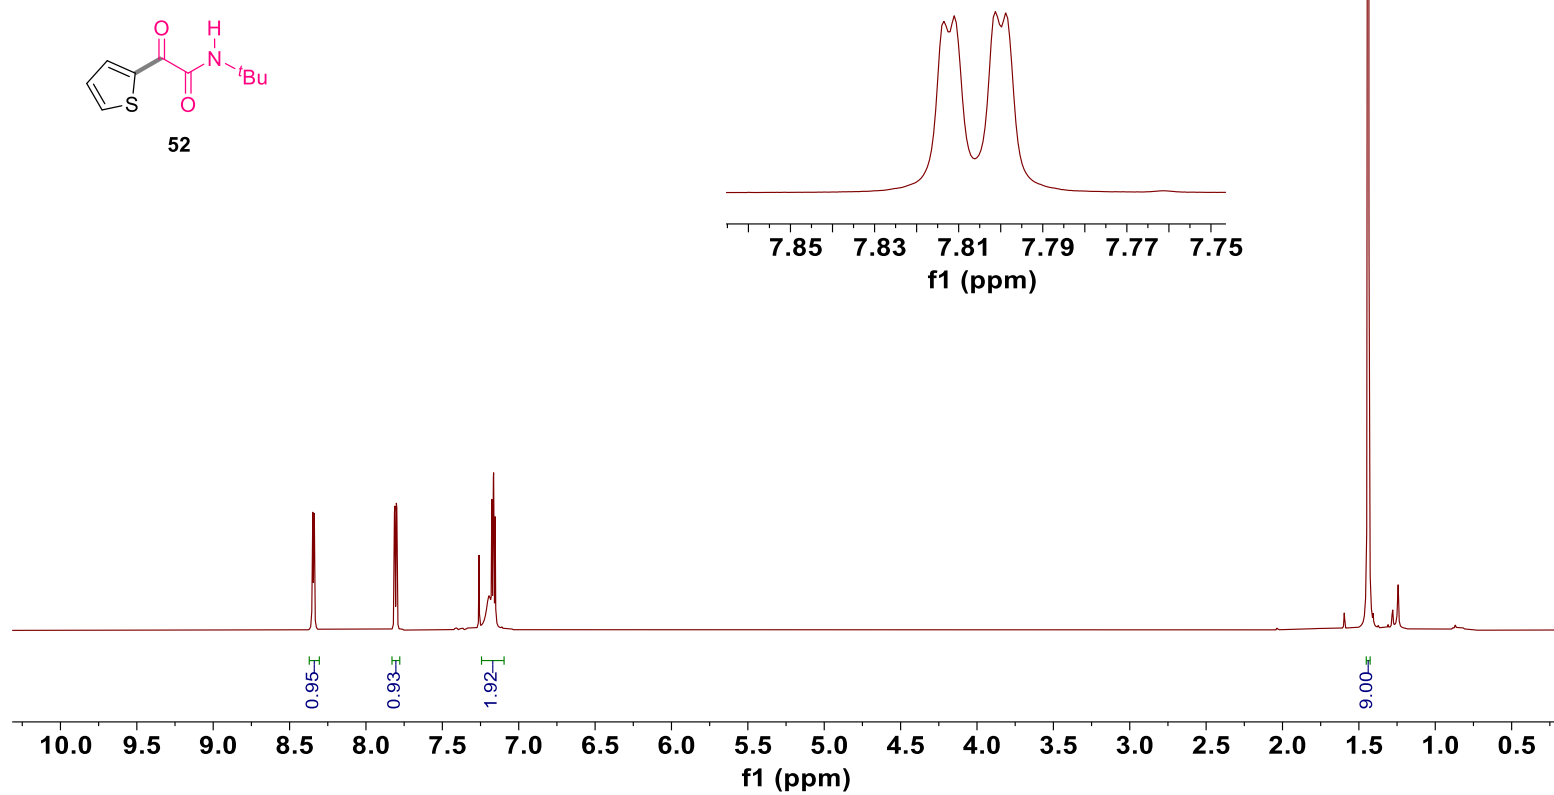

CJH-1-117-1-C

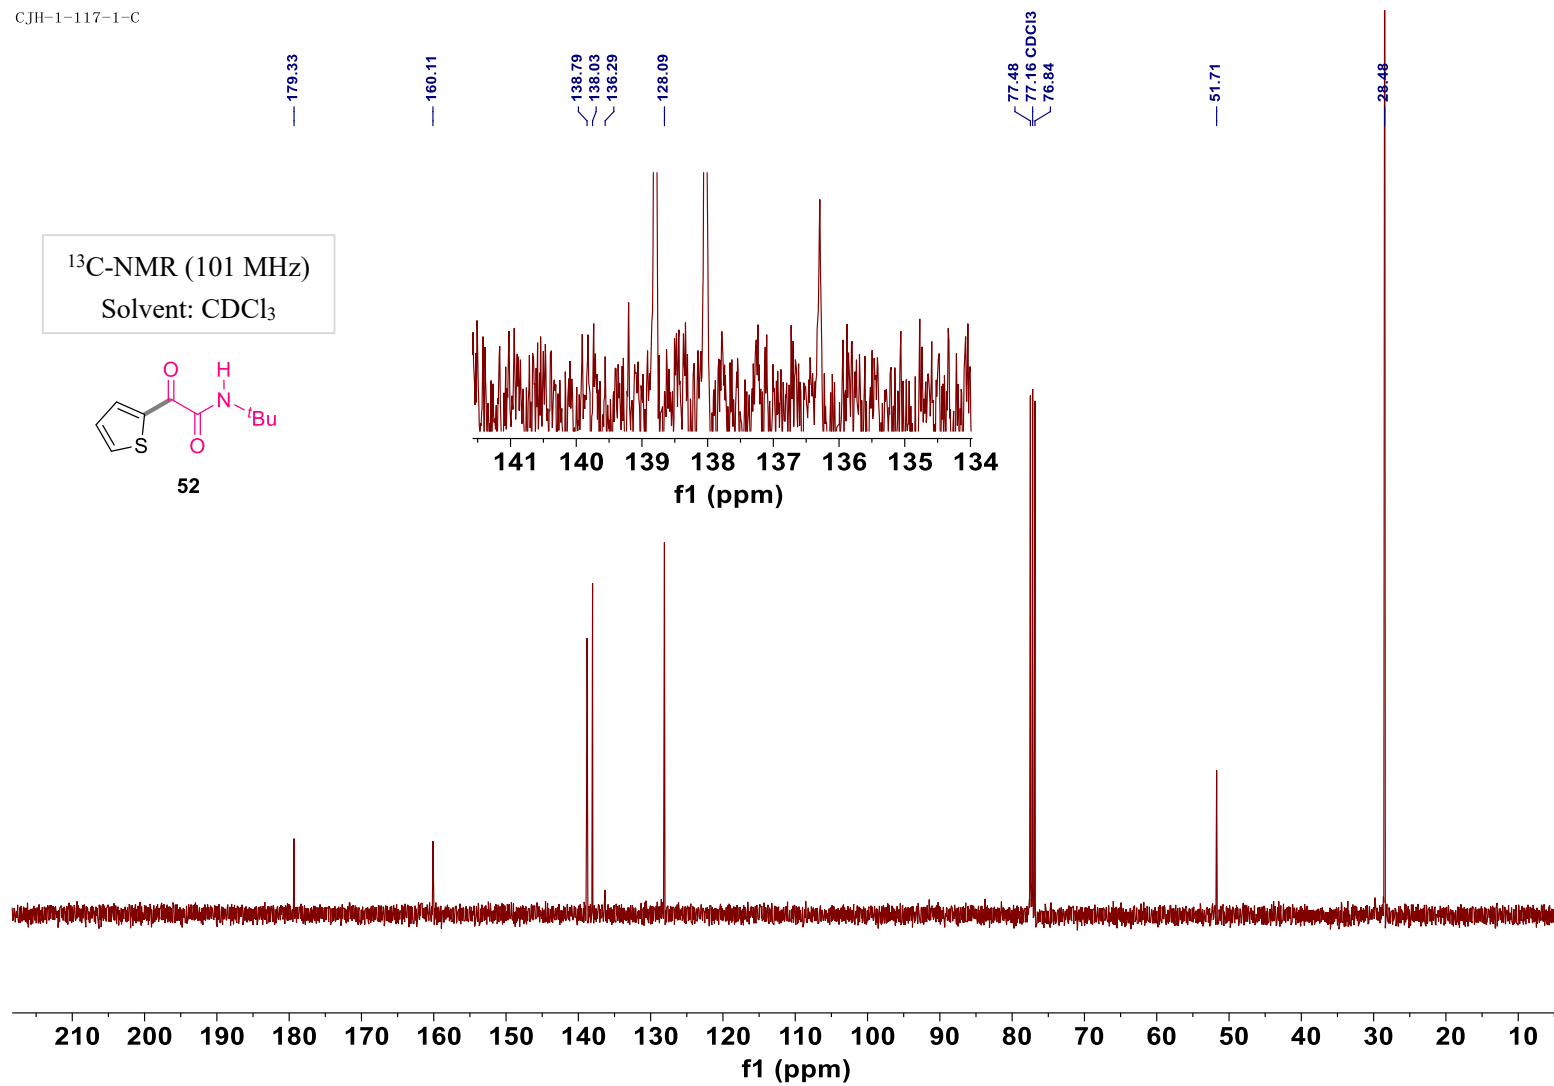

S180

CJH-1-117-2-H

<sup>1</sup>H-NMR (400 MHz)

Solvent: CDCl<sub>3</sub>

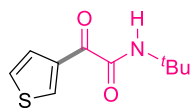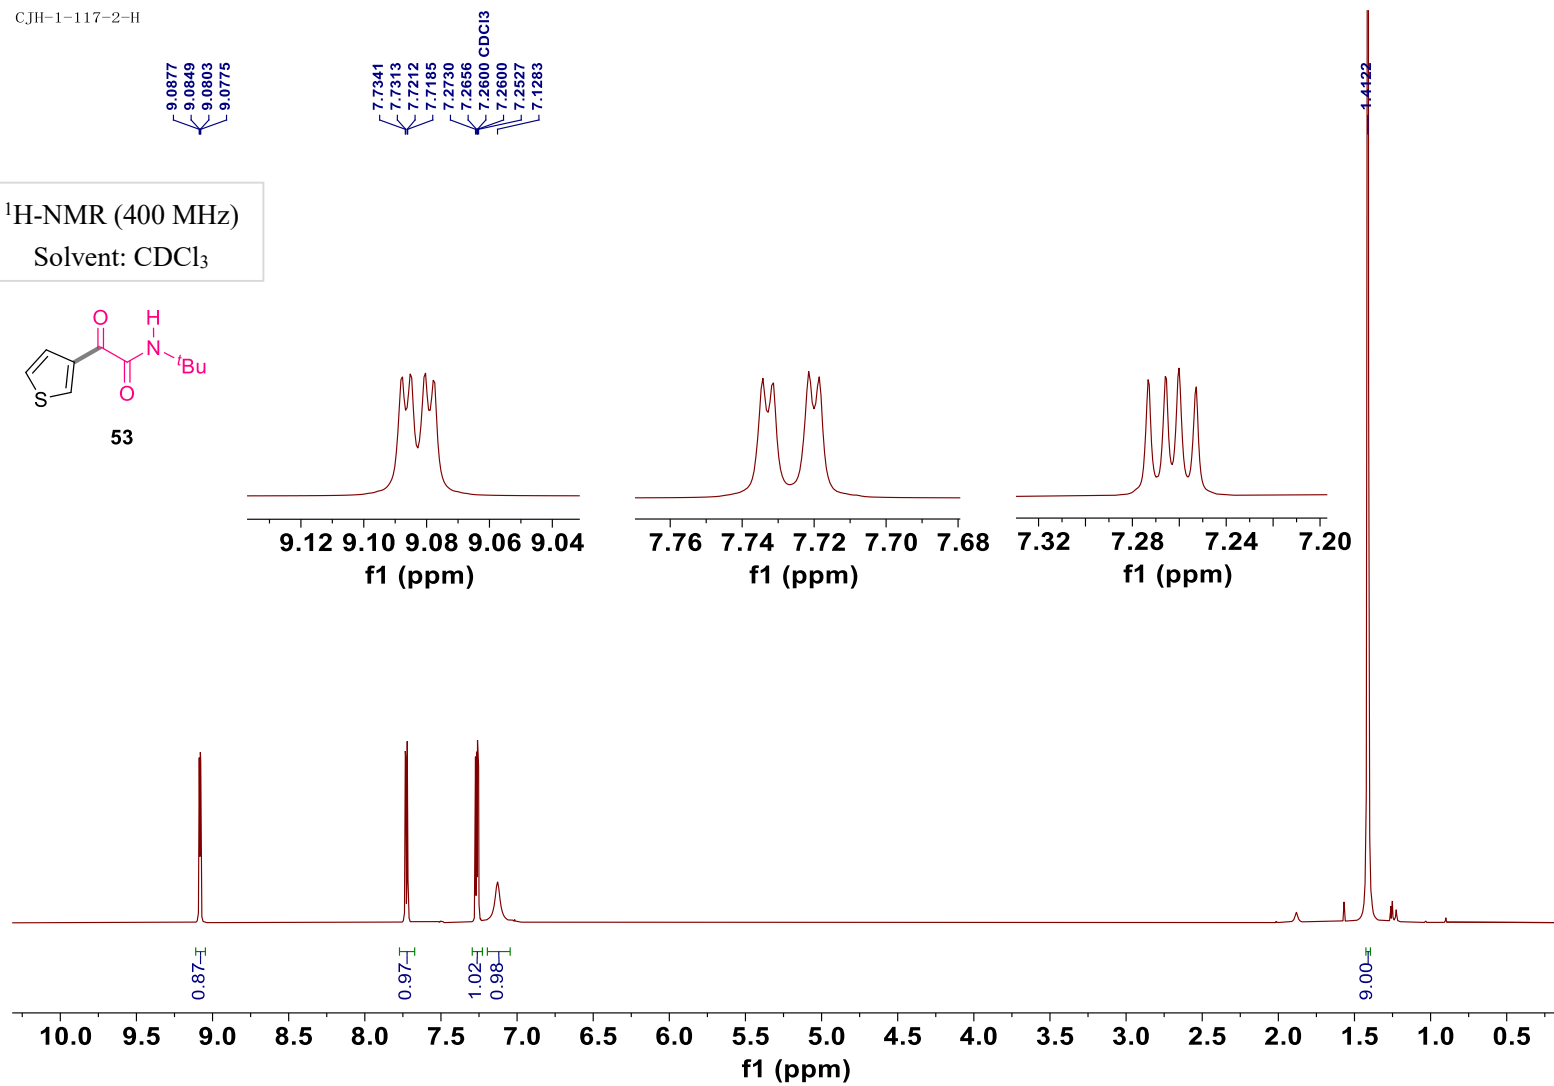

CJH-1-117-2-C

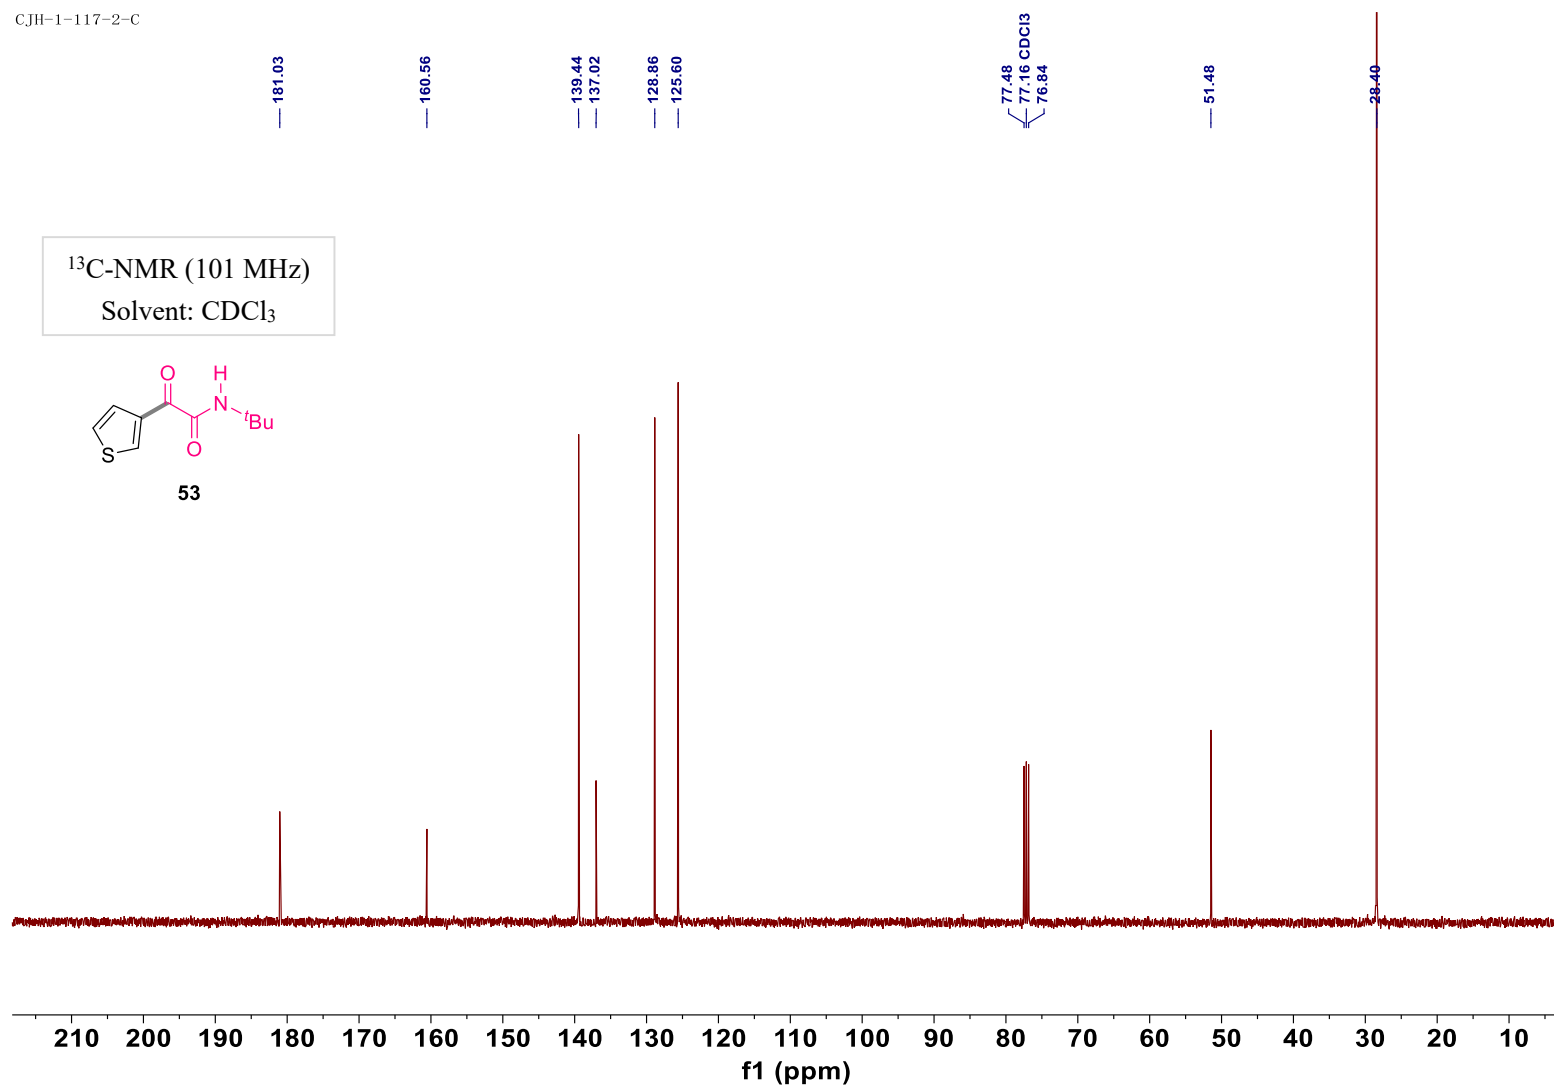

CJH-1-118-2-H

9.7186

8.7104  
8.6900

7.8765  
7.8565  
7.5168  
7.5140  
7.4988  
7.4963  
7.4786  
7.4757  
7.4316  
7.4286  
7.4114  
7.4108  
7.3937  
7.3907  
7.2990  
7.2600 CDCl<sub>3</sub>

<sup>1</sup>H-NMR (400 MHz)

Solvent: CDCl<sub>3</sub>

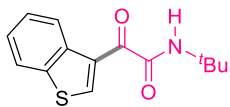

54

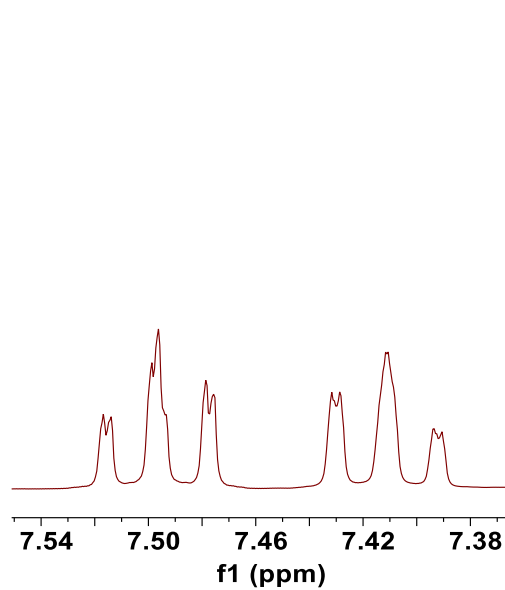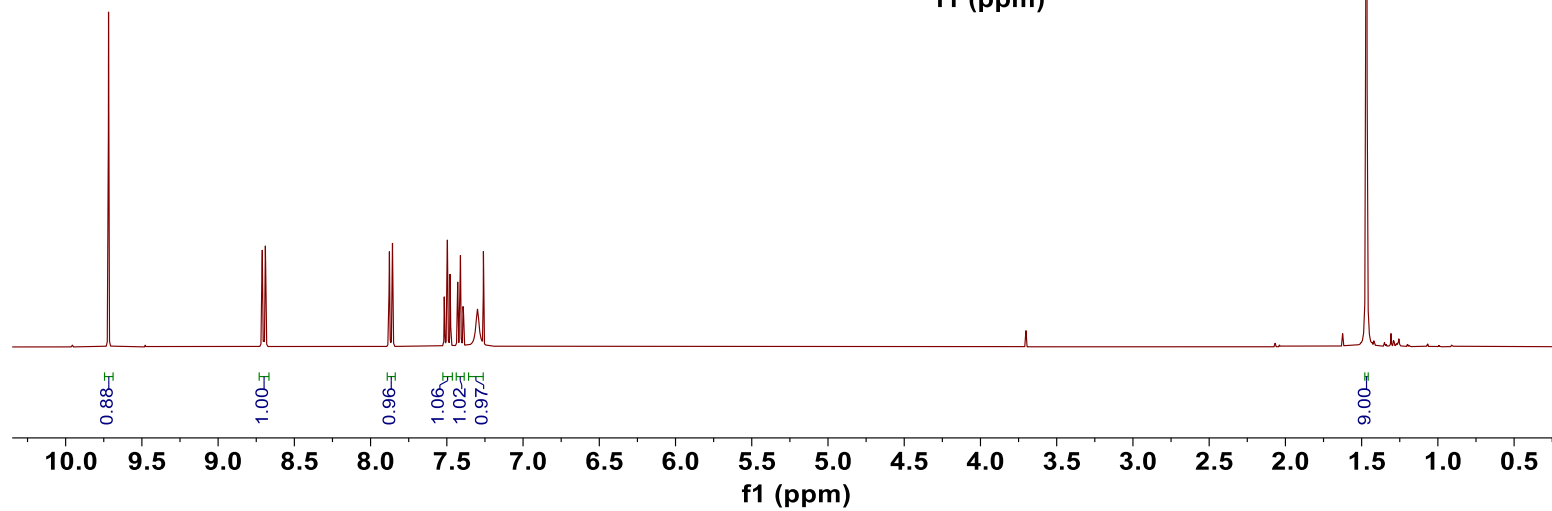

CJH-1-118-2-C

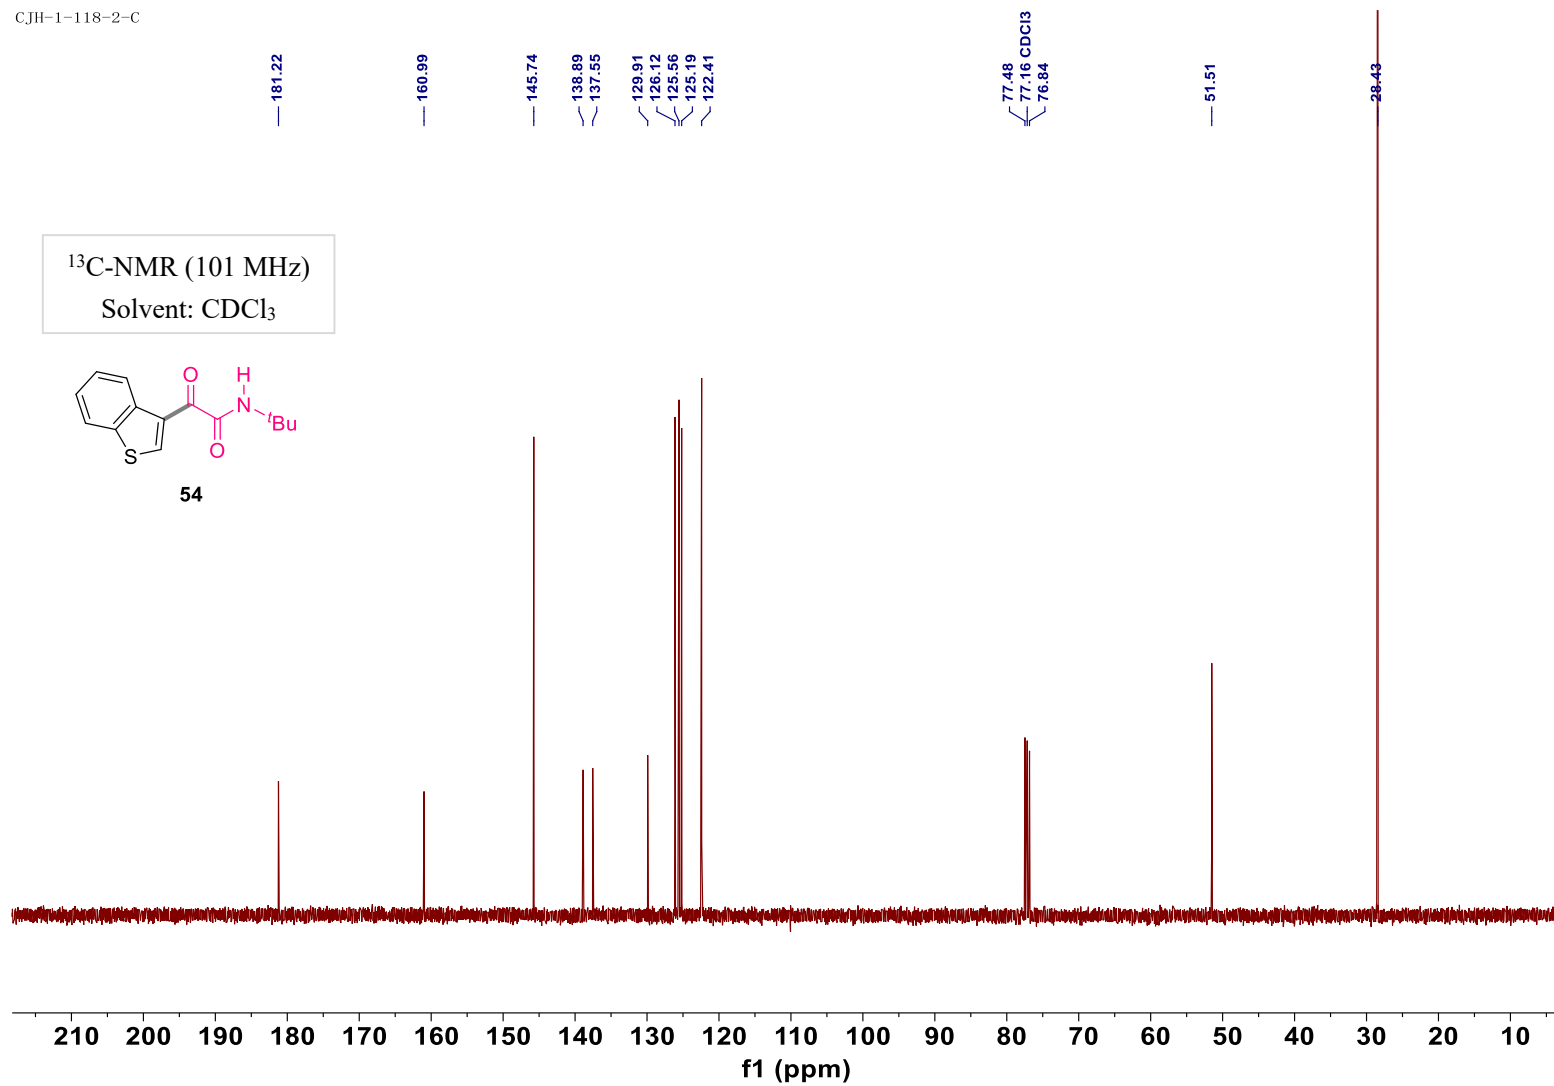

S184

CJH-1-119-2-H

<sup>1</sup>H-NMR (400 MHz)

Solvent: CDCl<sub>3</sub>

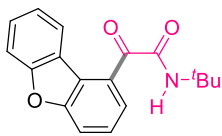

55

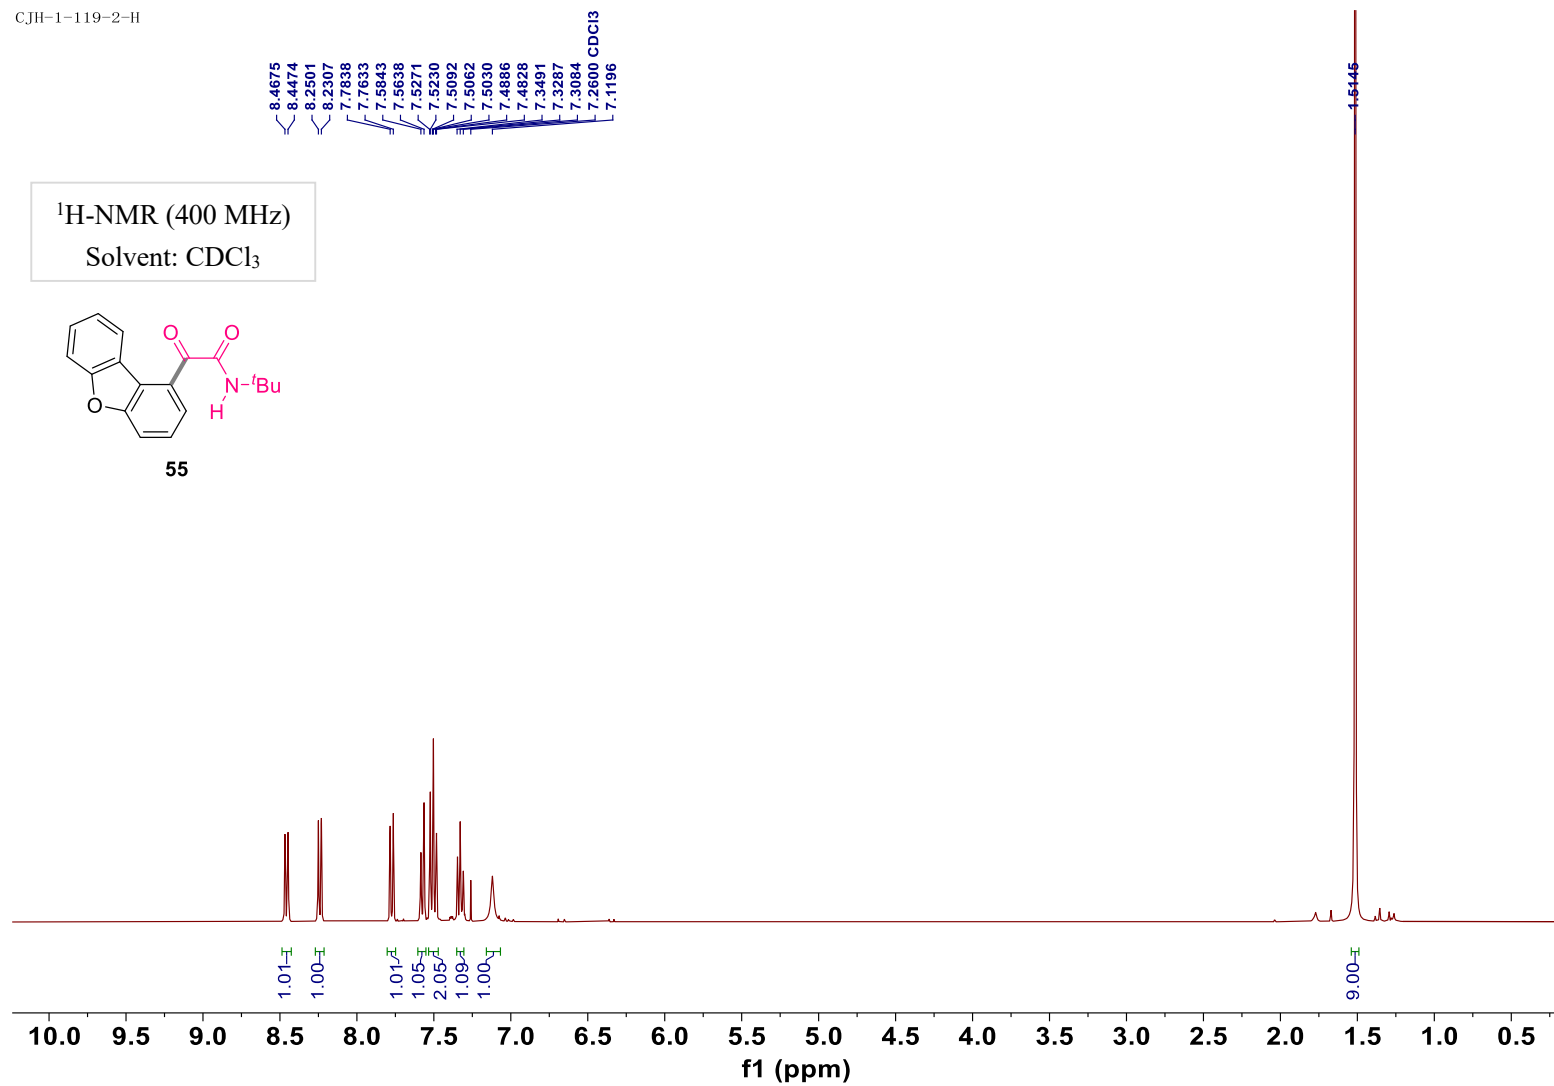

S185



CJH-1-119-2-C

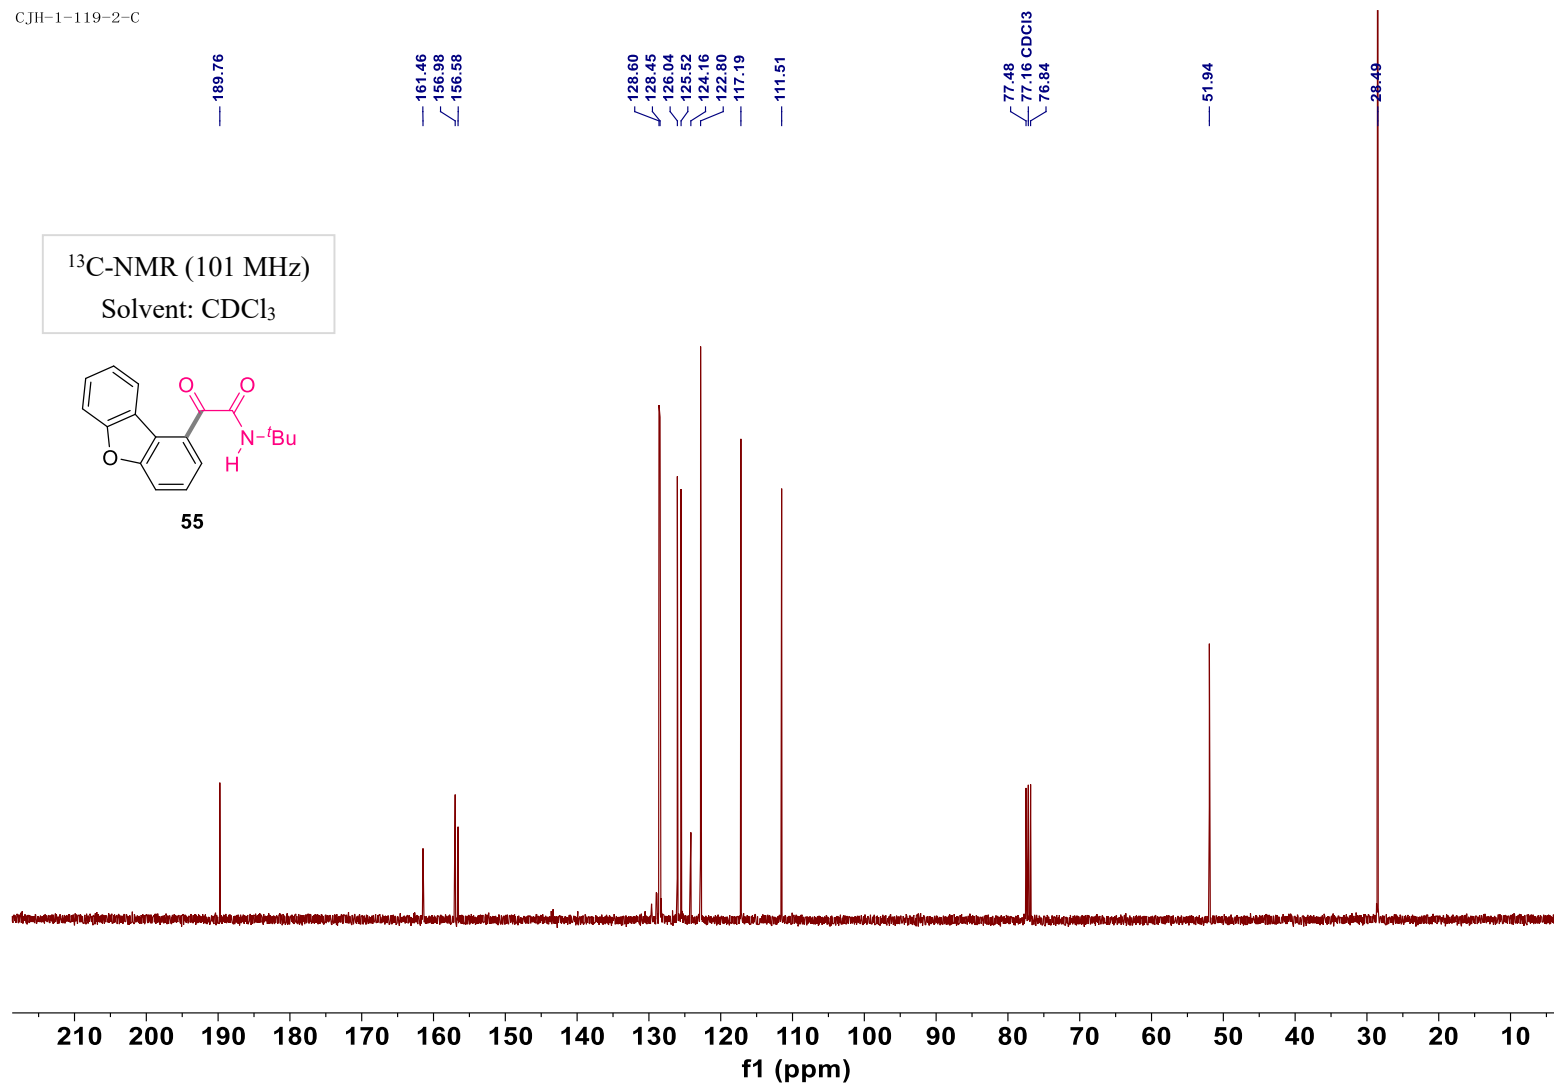

S186

CJH-1-120-3-H

$^1\text{H}$ -NMR (400 MHz)  
Solvent:  $\text{CDCl}_3$

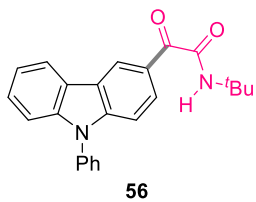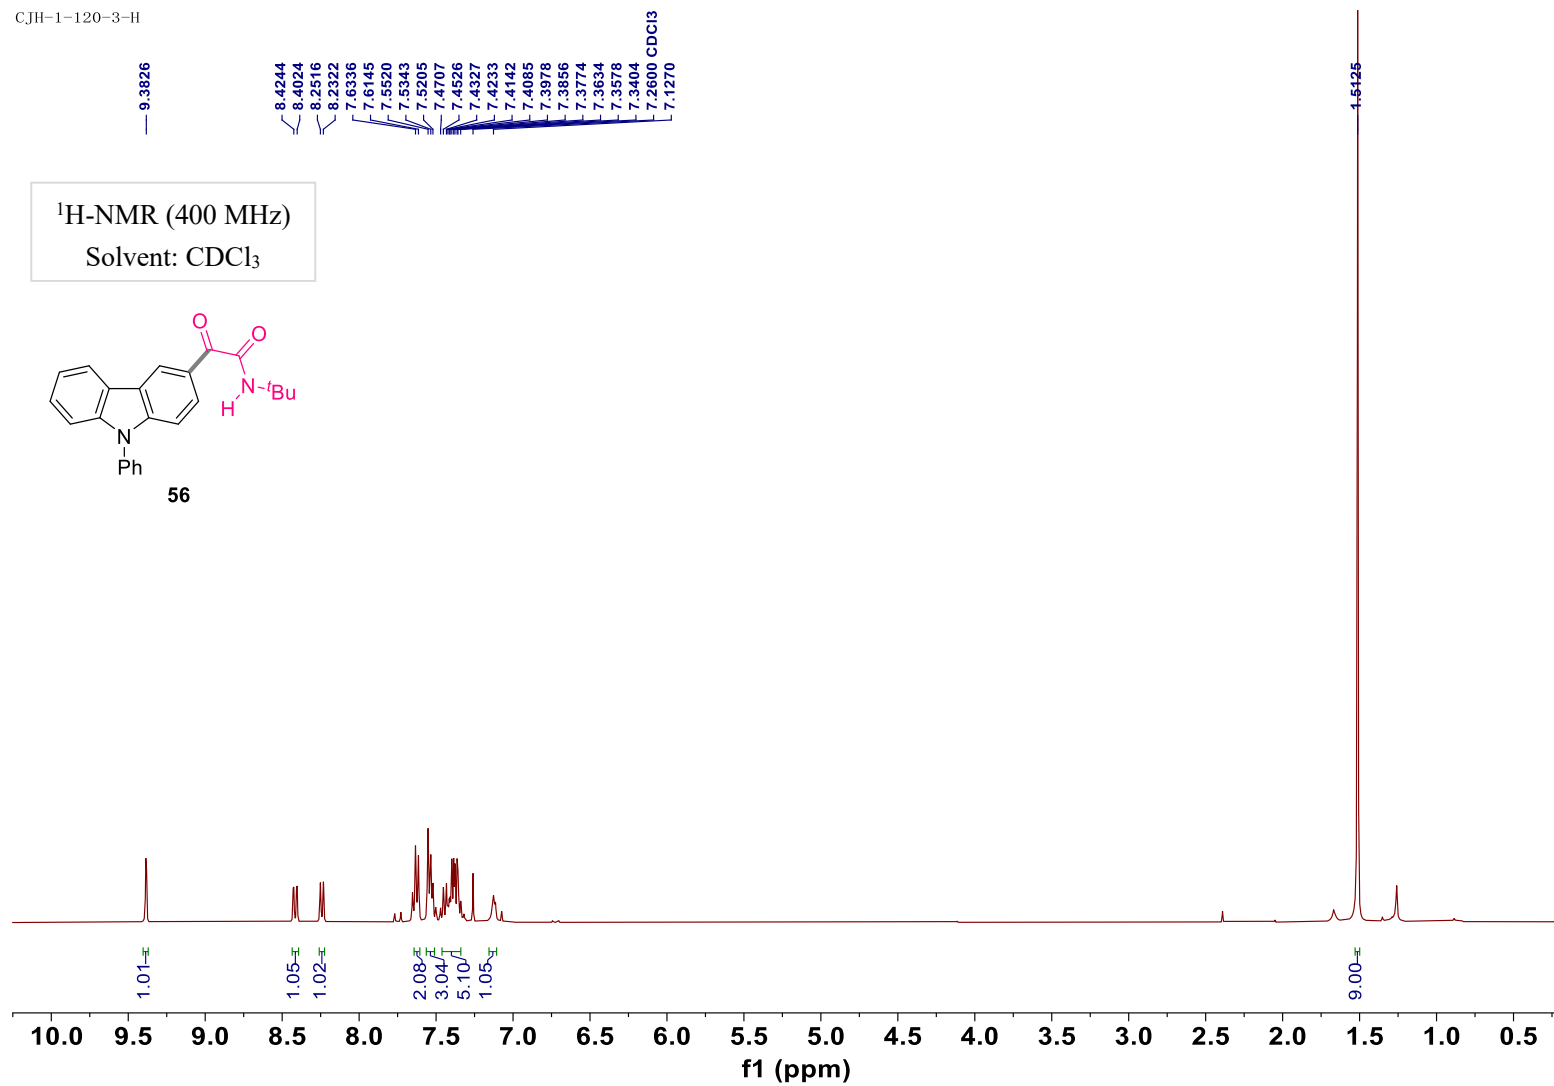

S187

CJH-1-120-3-C

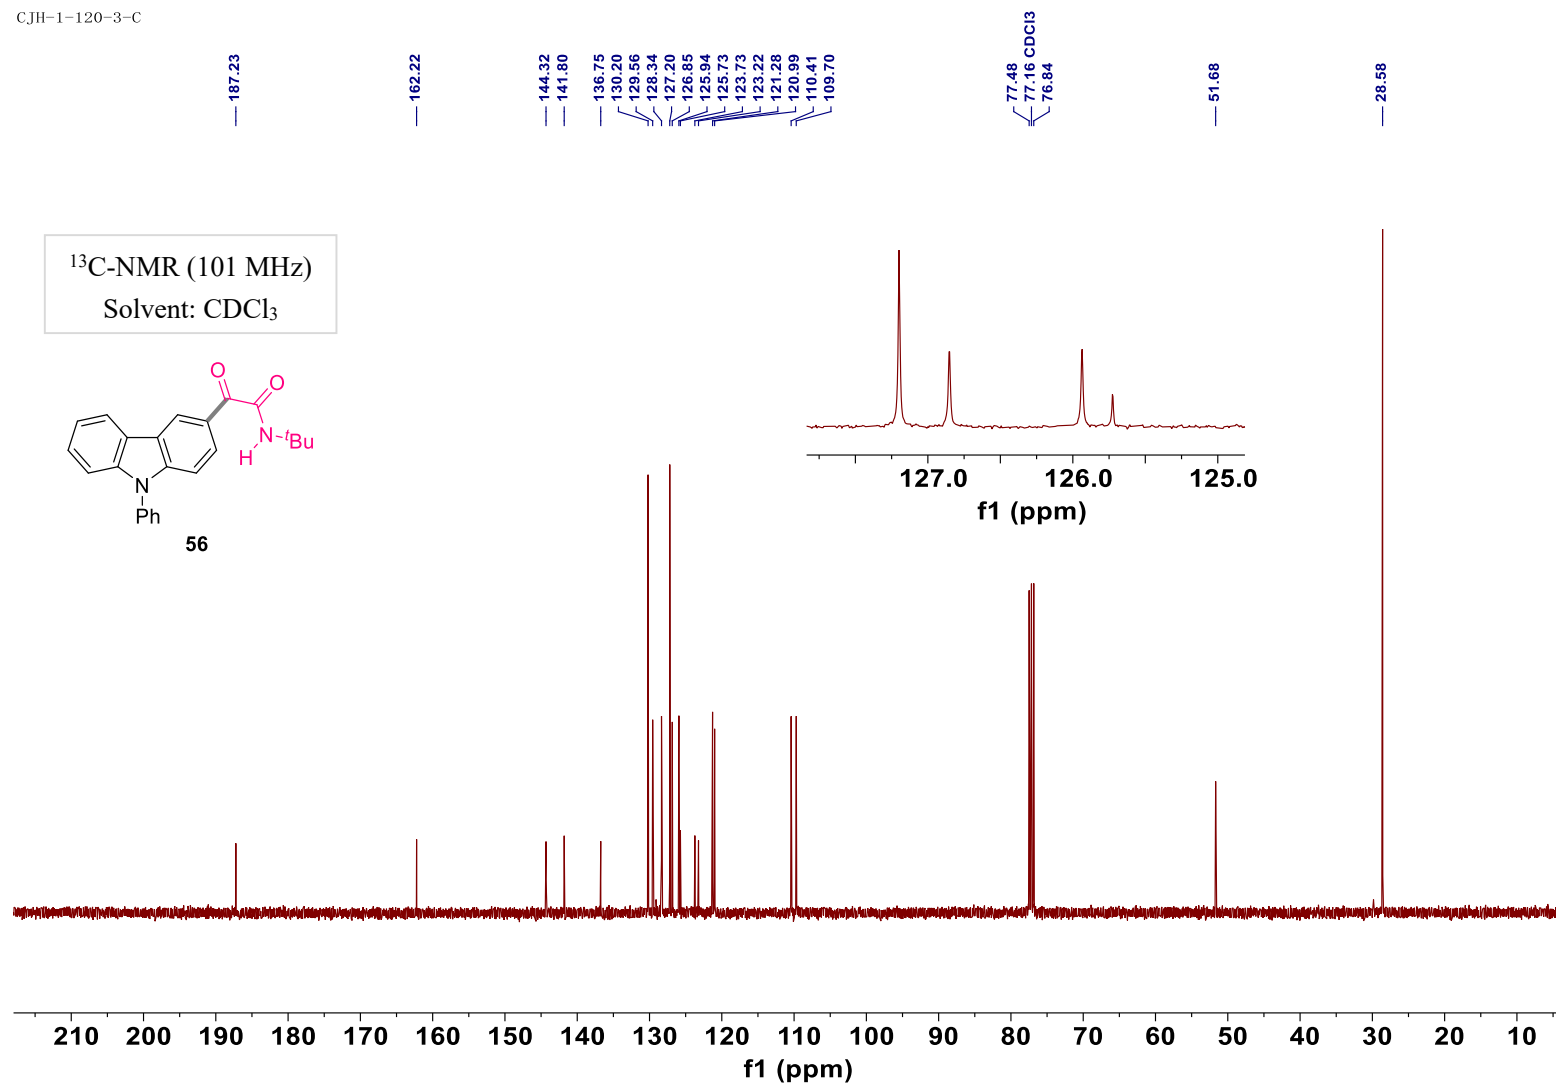

CJH-1-161-1-H

<sup>1</sup>H-NMR (400 MHz)  
Solvent: CDCl<sub>3</sub>

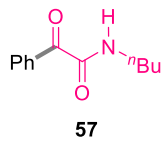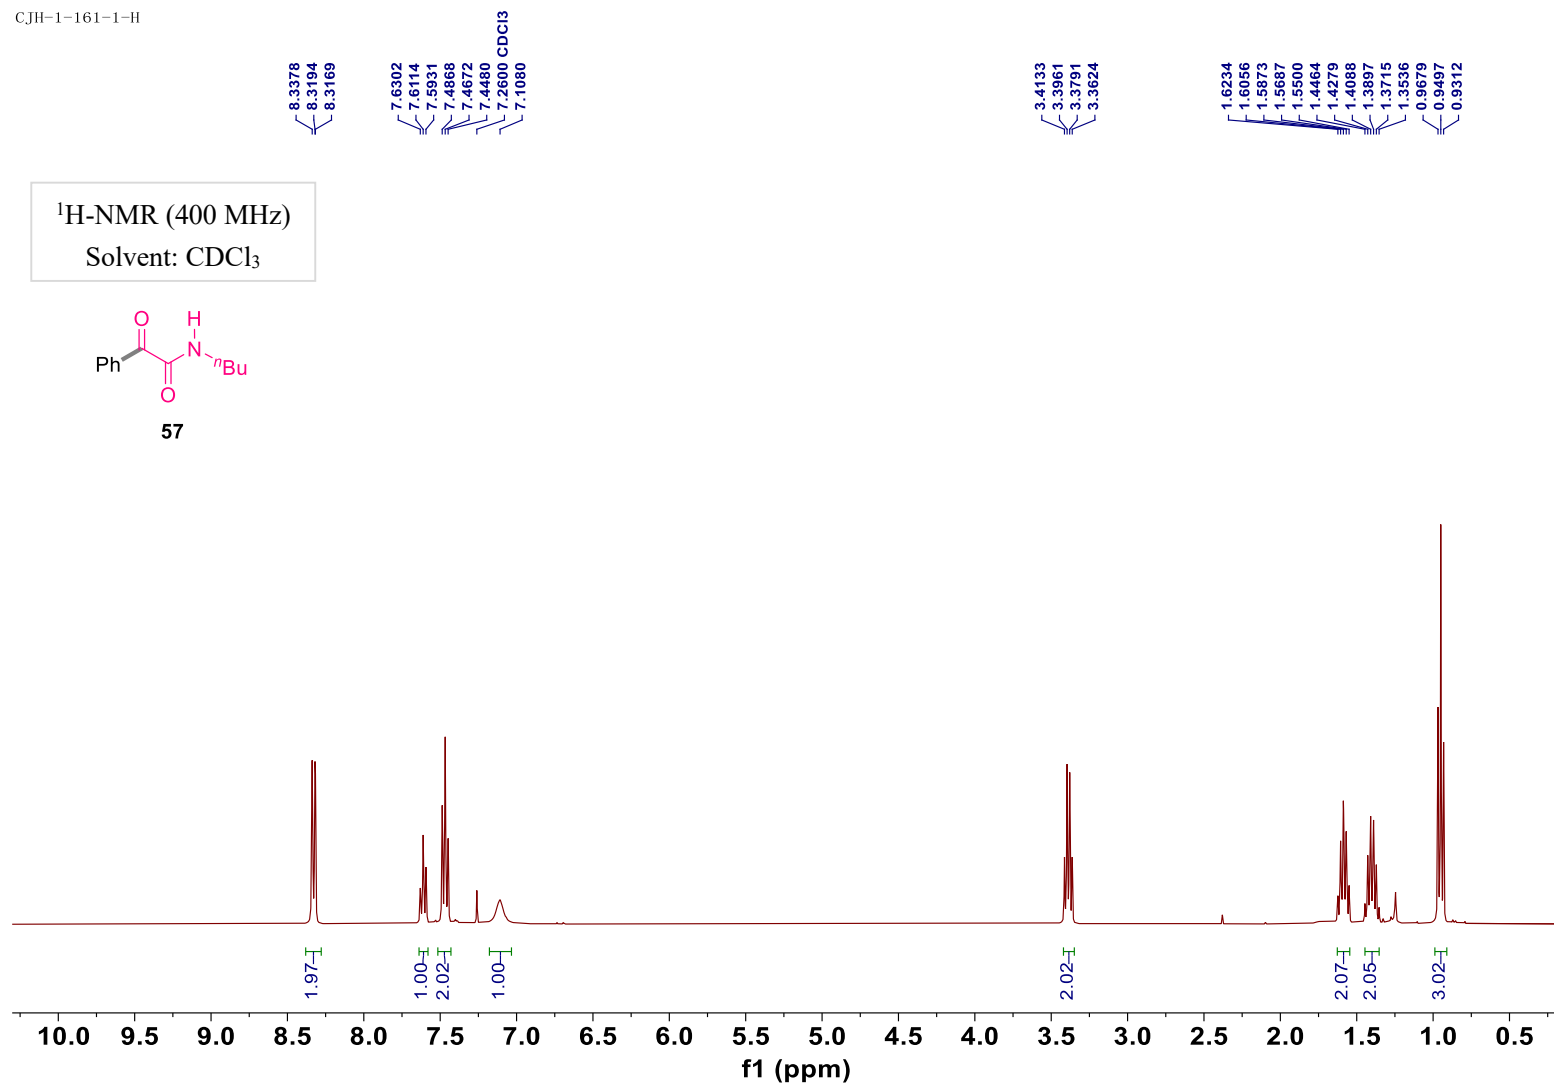

CJH-1-161-1-C

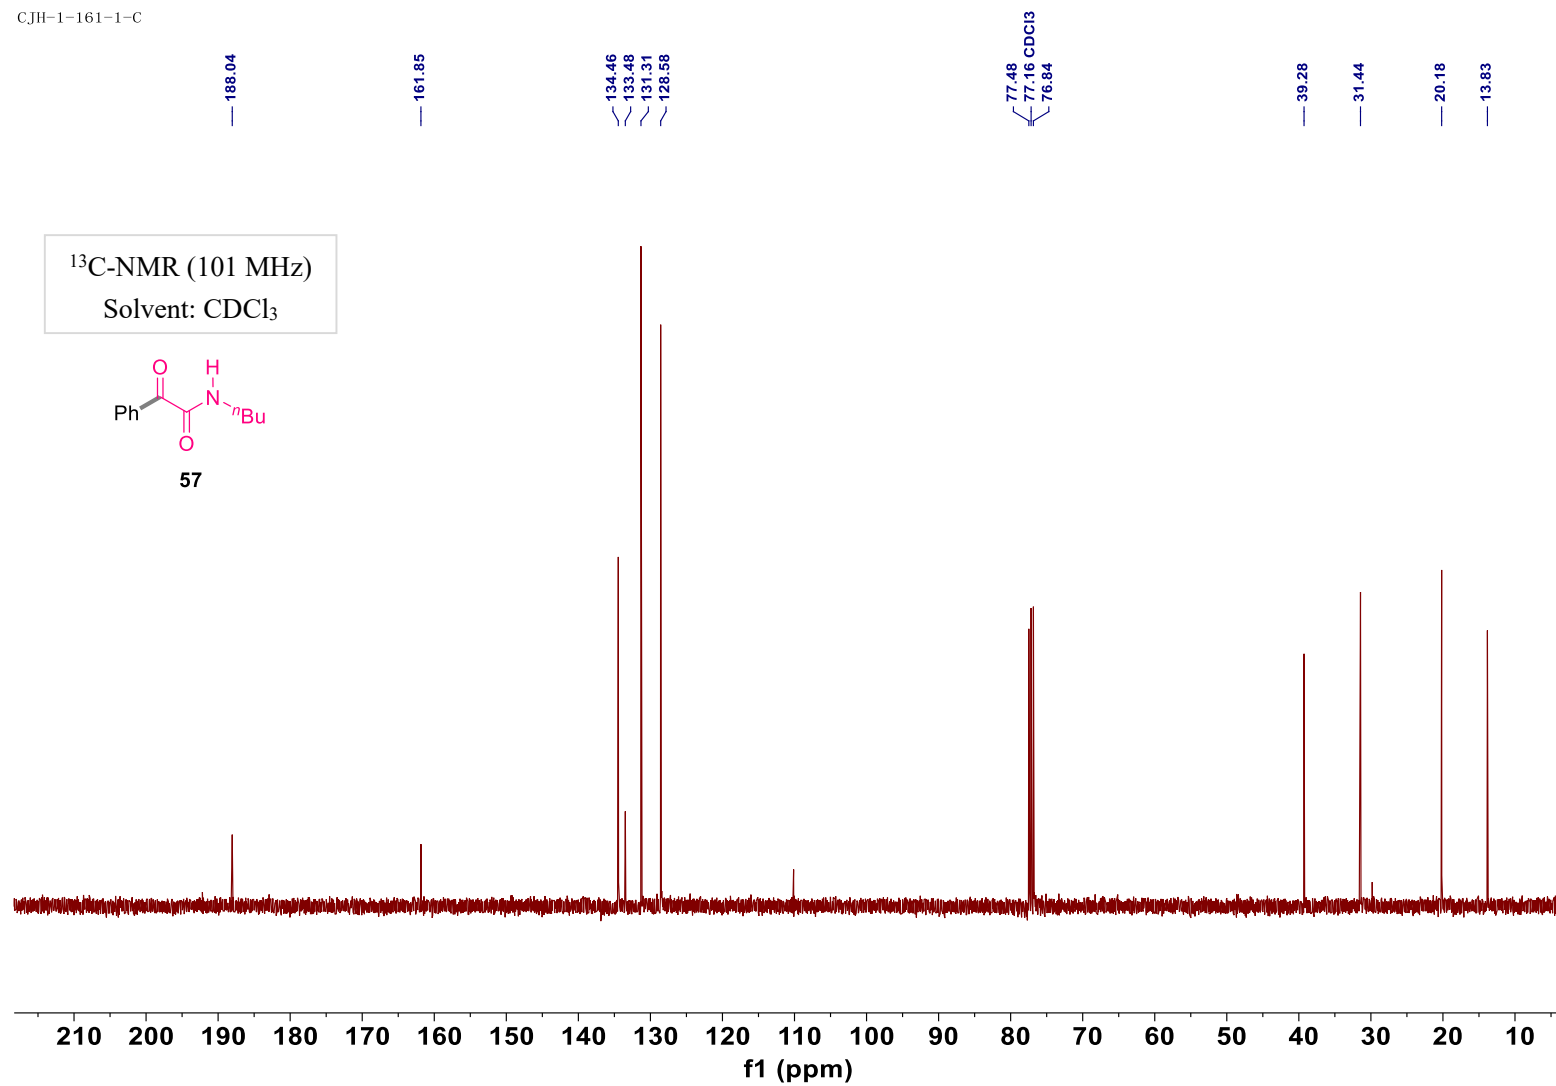

CJH-1-169-2-H

<sup>1</sup>H-NMR (400 MHz)  
Solvent: CDCl<sub>3</sub>

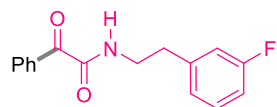

58

8.2983  
8.2789  
7.6553  
7.6168  
7.5983  
7.4861  
7.4668  
7.4476  
7.3034  
7.2839  
7.2600 CDCl<sub>3</sub>  
7.2466  
7.2094  
7.0135  
6.9945  
6.9544  
6.9416  
6.9344  
6.9207

3.6720  
3.6550  
3.6381  
3.6208

2.9228  
2.9051  
2.8872

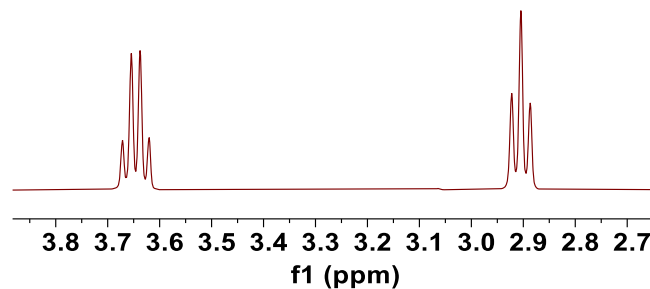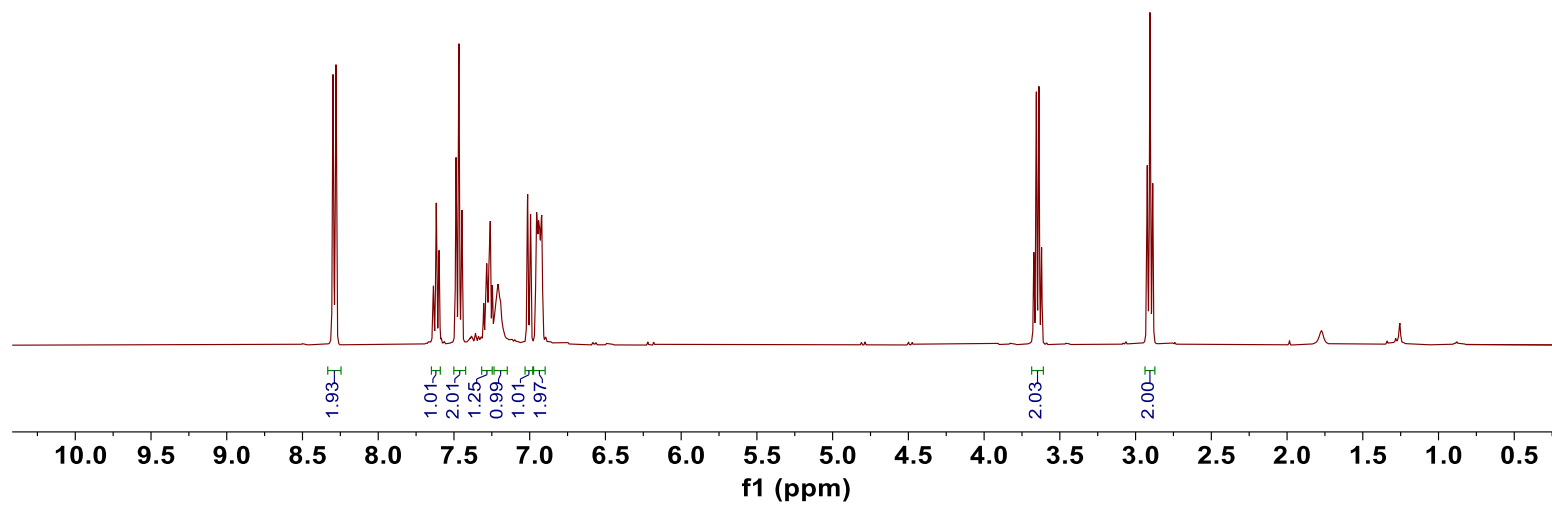

S191

CJH-1-169-2-C

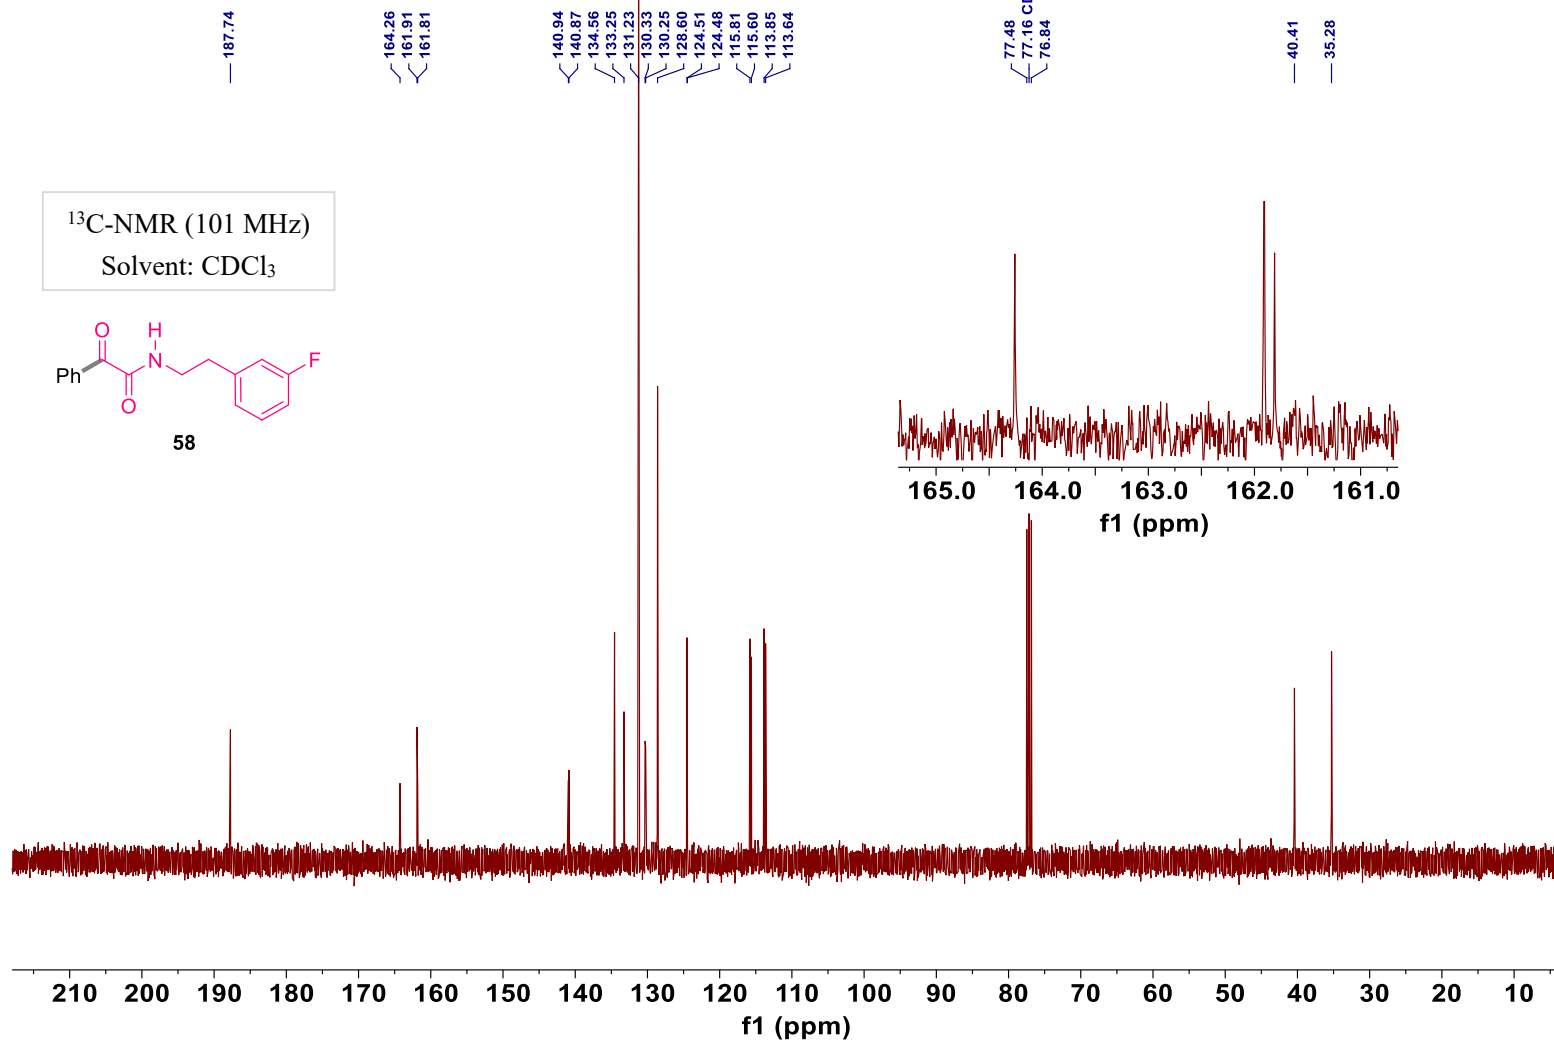

CJH-1-182-1-H

<sup>1</sup>H-NMR (400 MHz)  
Solvent: CDCl<sub>3</sub>

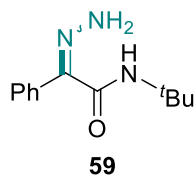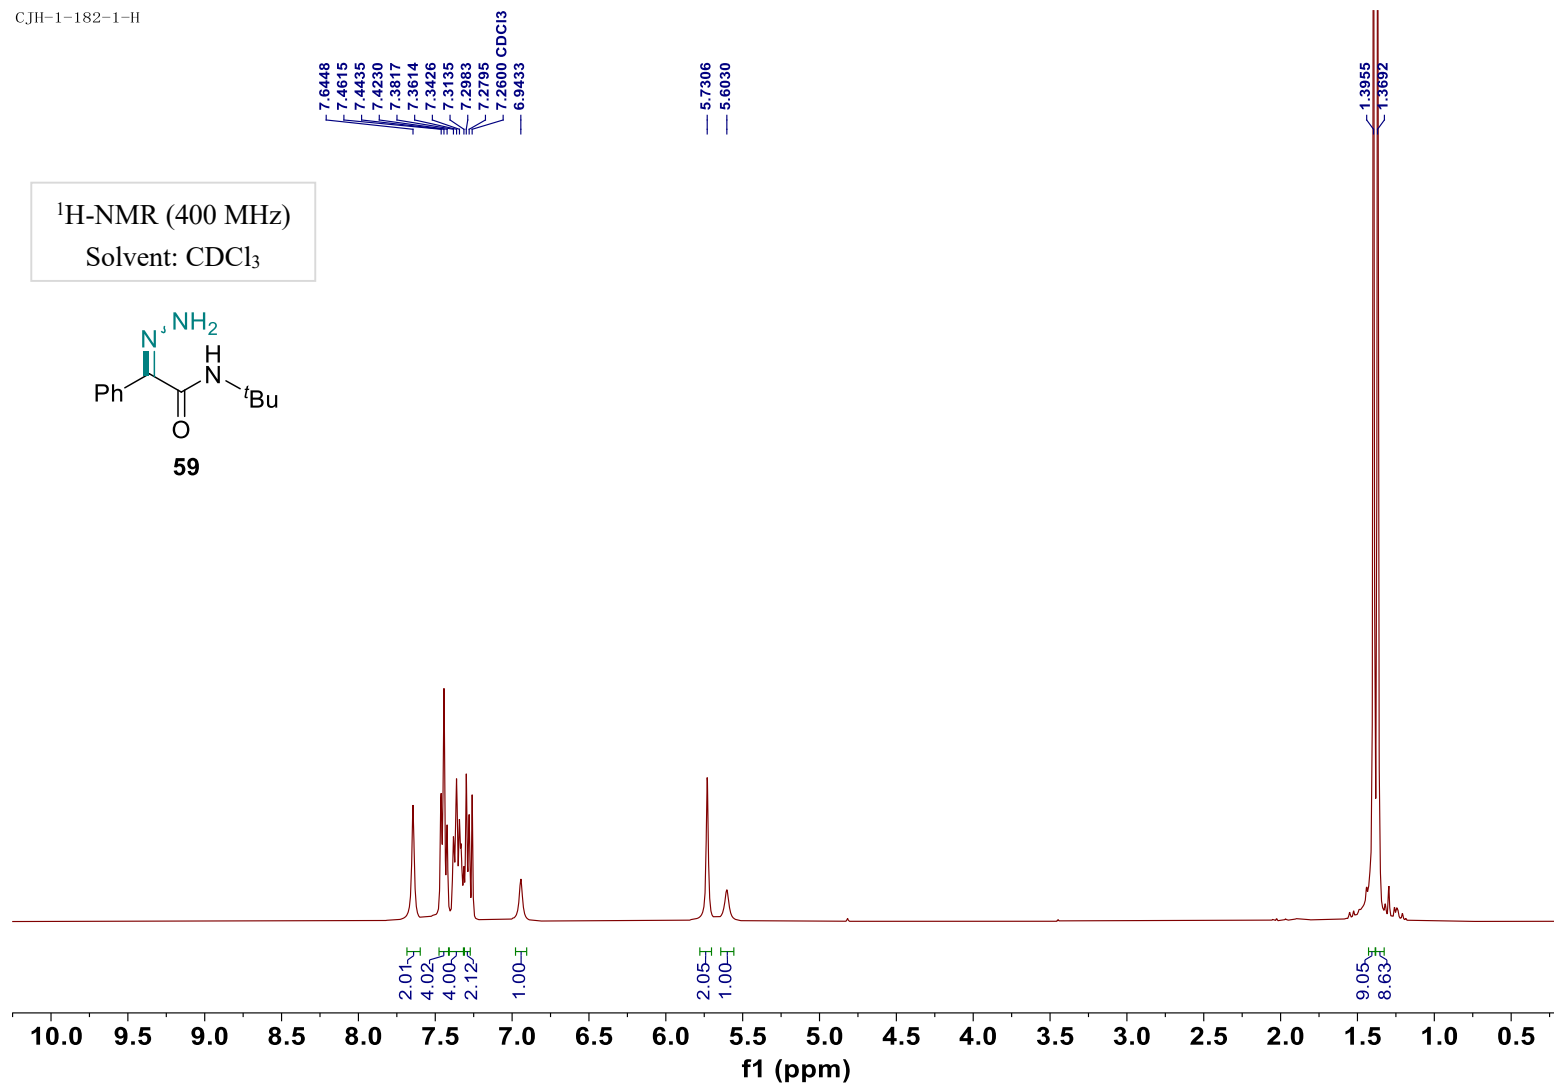

S193



CJH-1-182-1-C

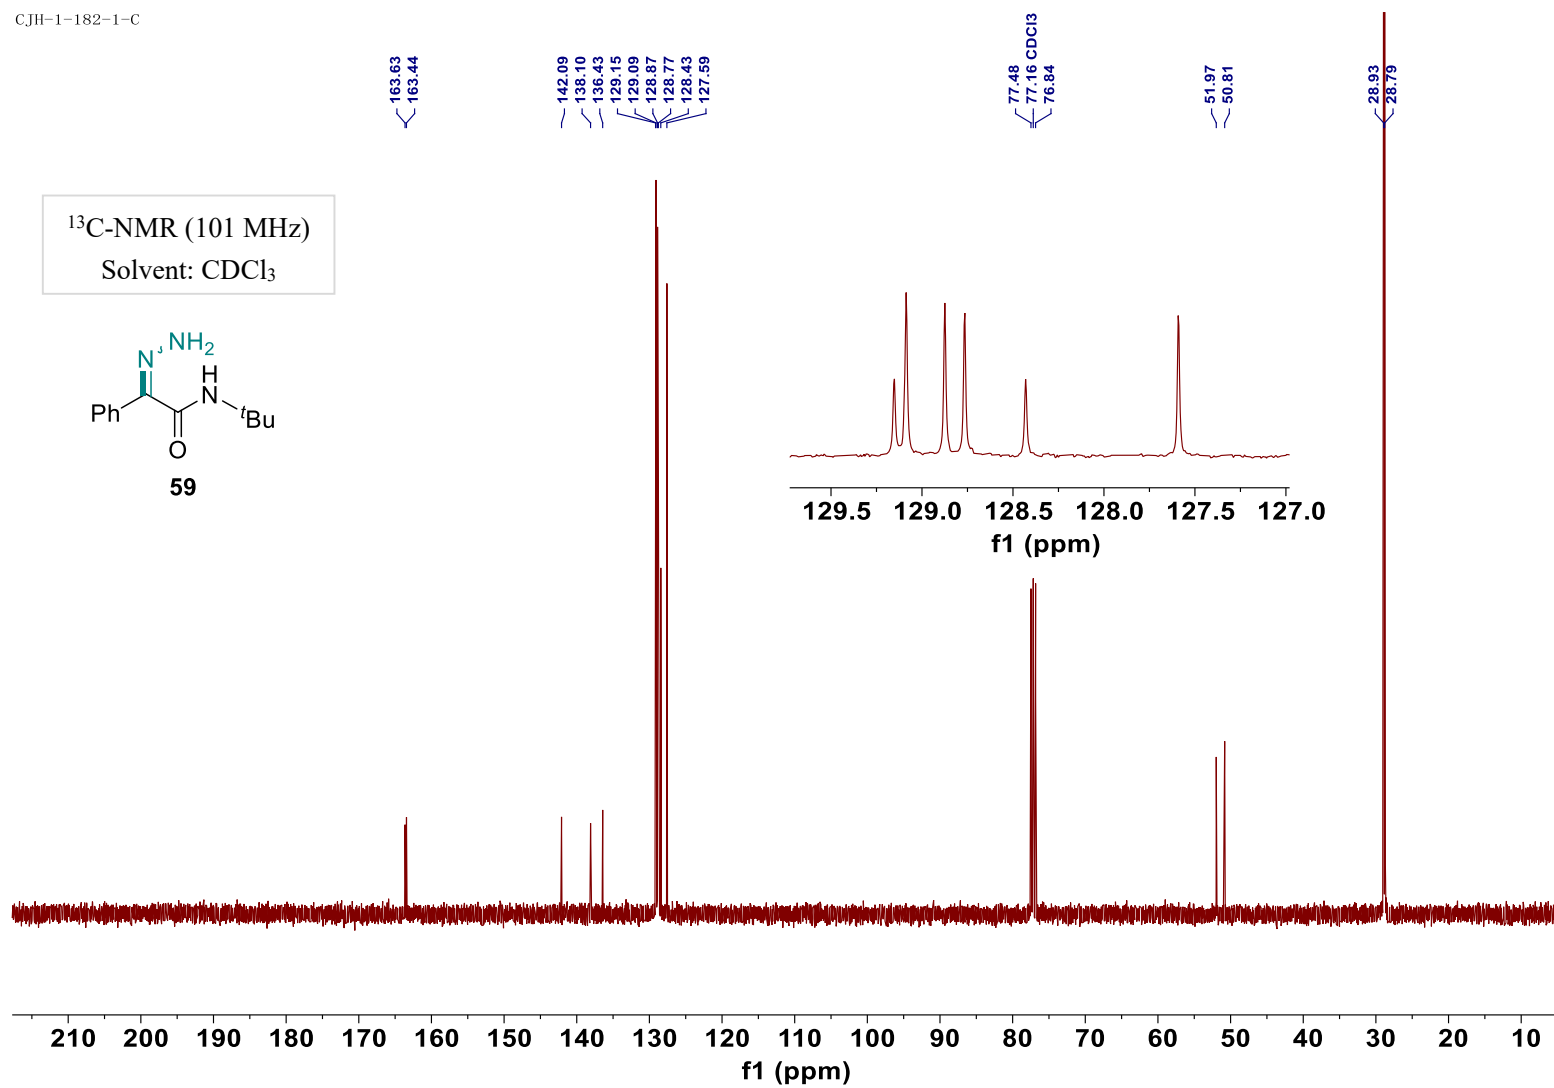

CJH-1-181-1-H

<sup>1</sup>H-NMR (400 MHz)  
Solvent: CDCl<sub>3</sub>

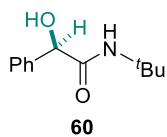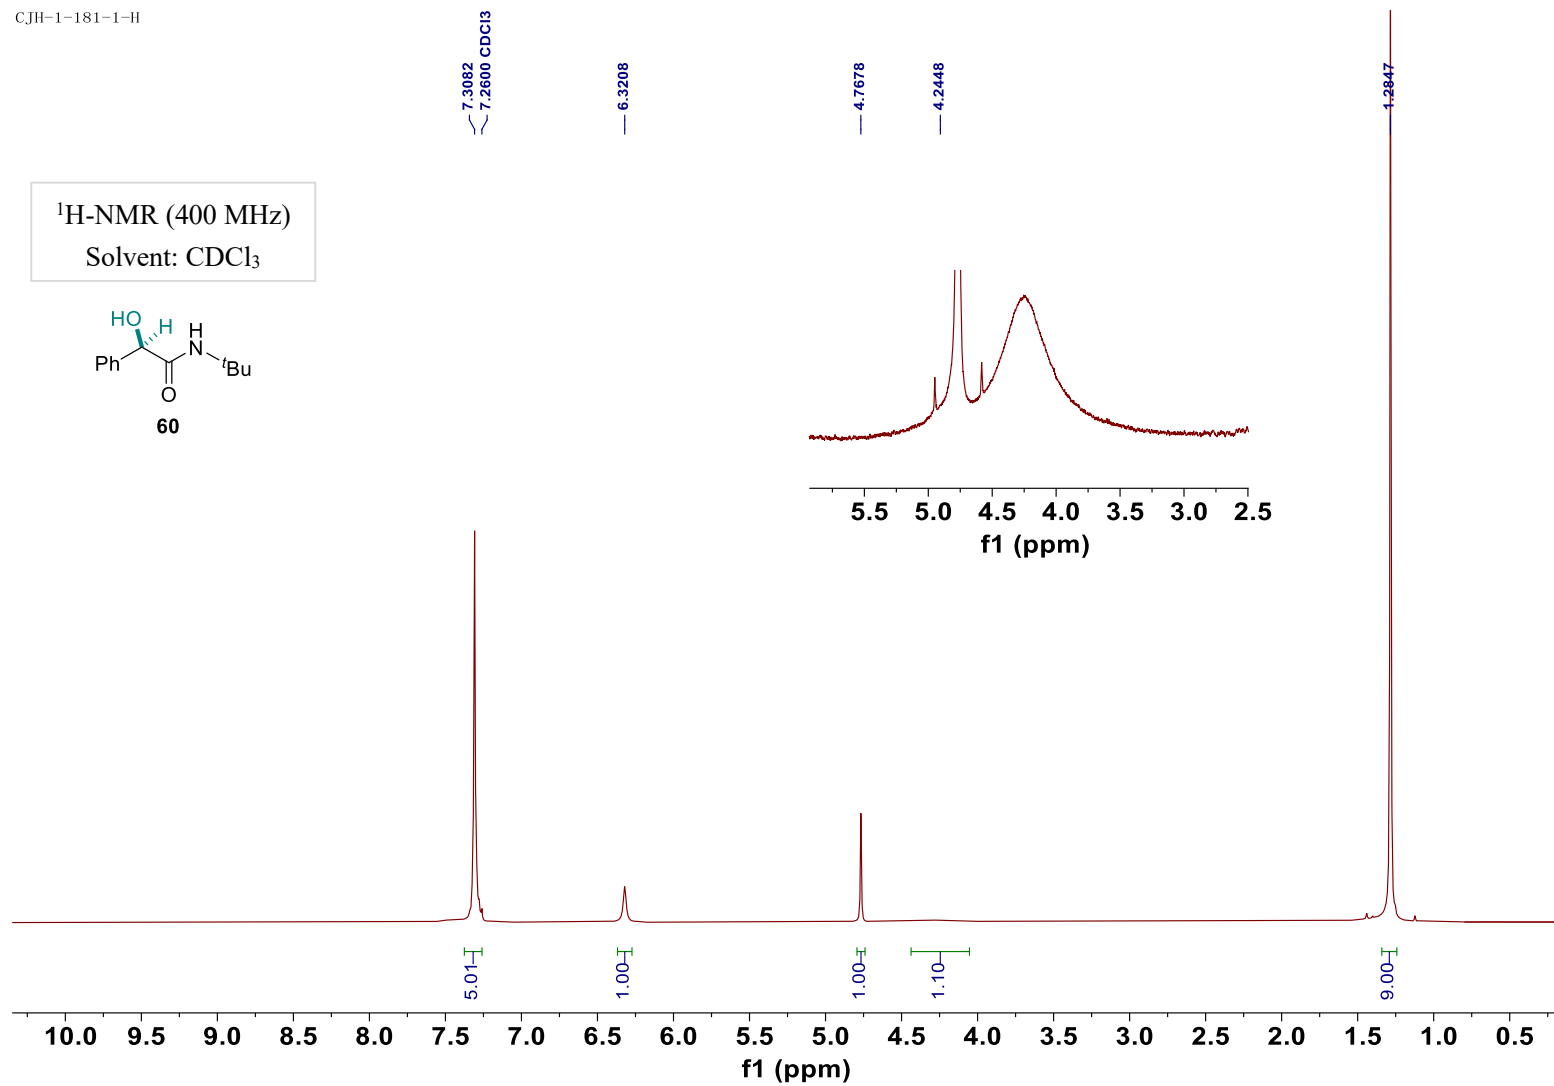

S195

CJH-1-181-1-C

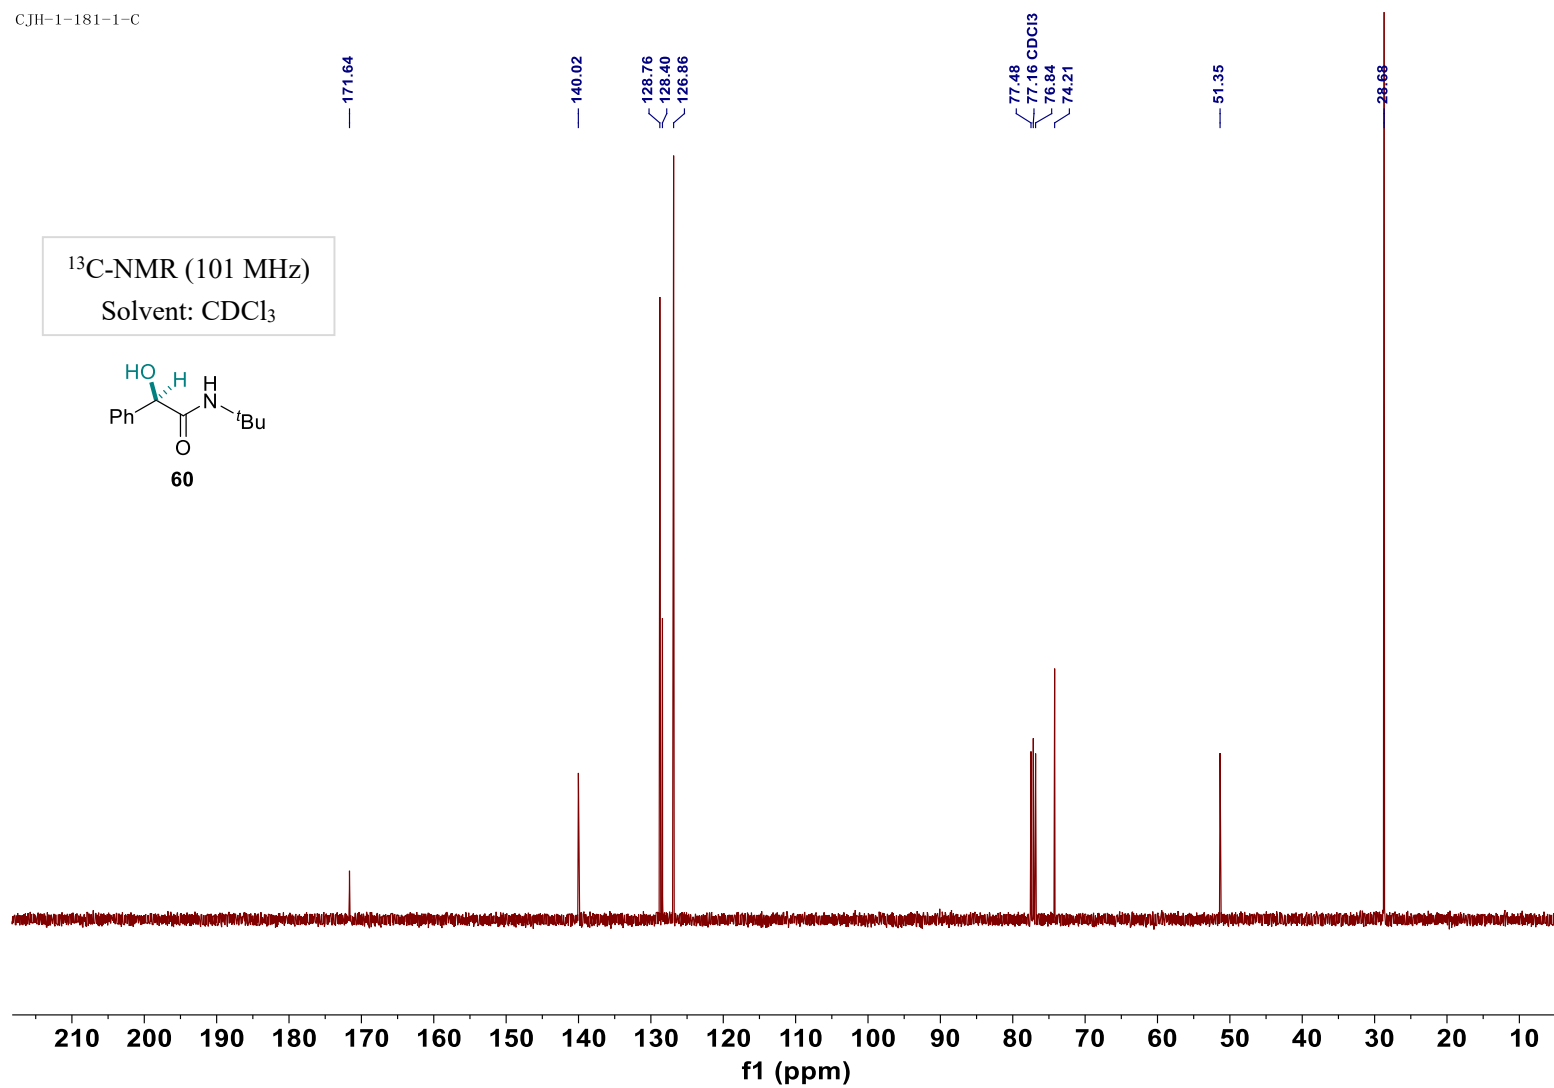

CJH-3-82-1-H

<sup>1</sup>H-NMR (400 MHz)  
Solvent: CDCl<sub>3</sub>

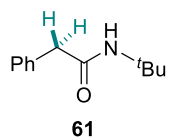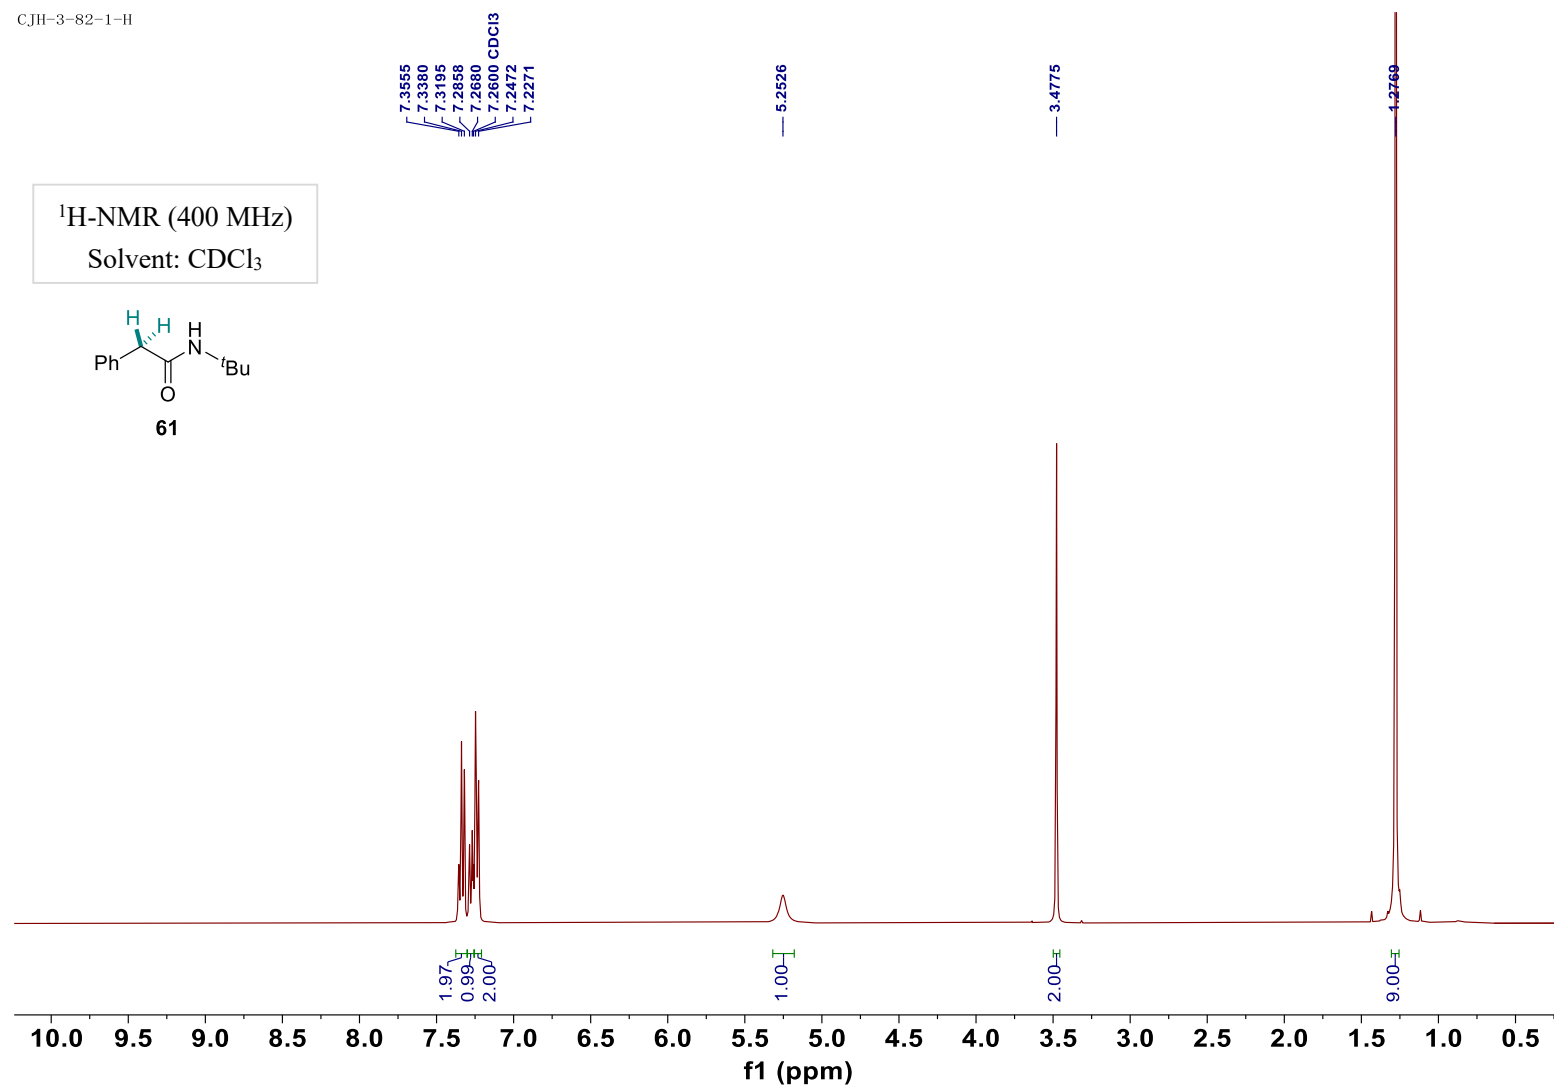

S197

CJH-3-82-1-C

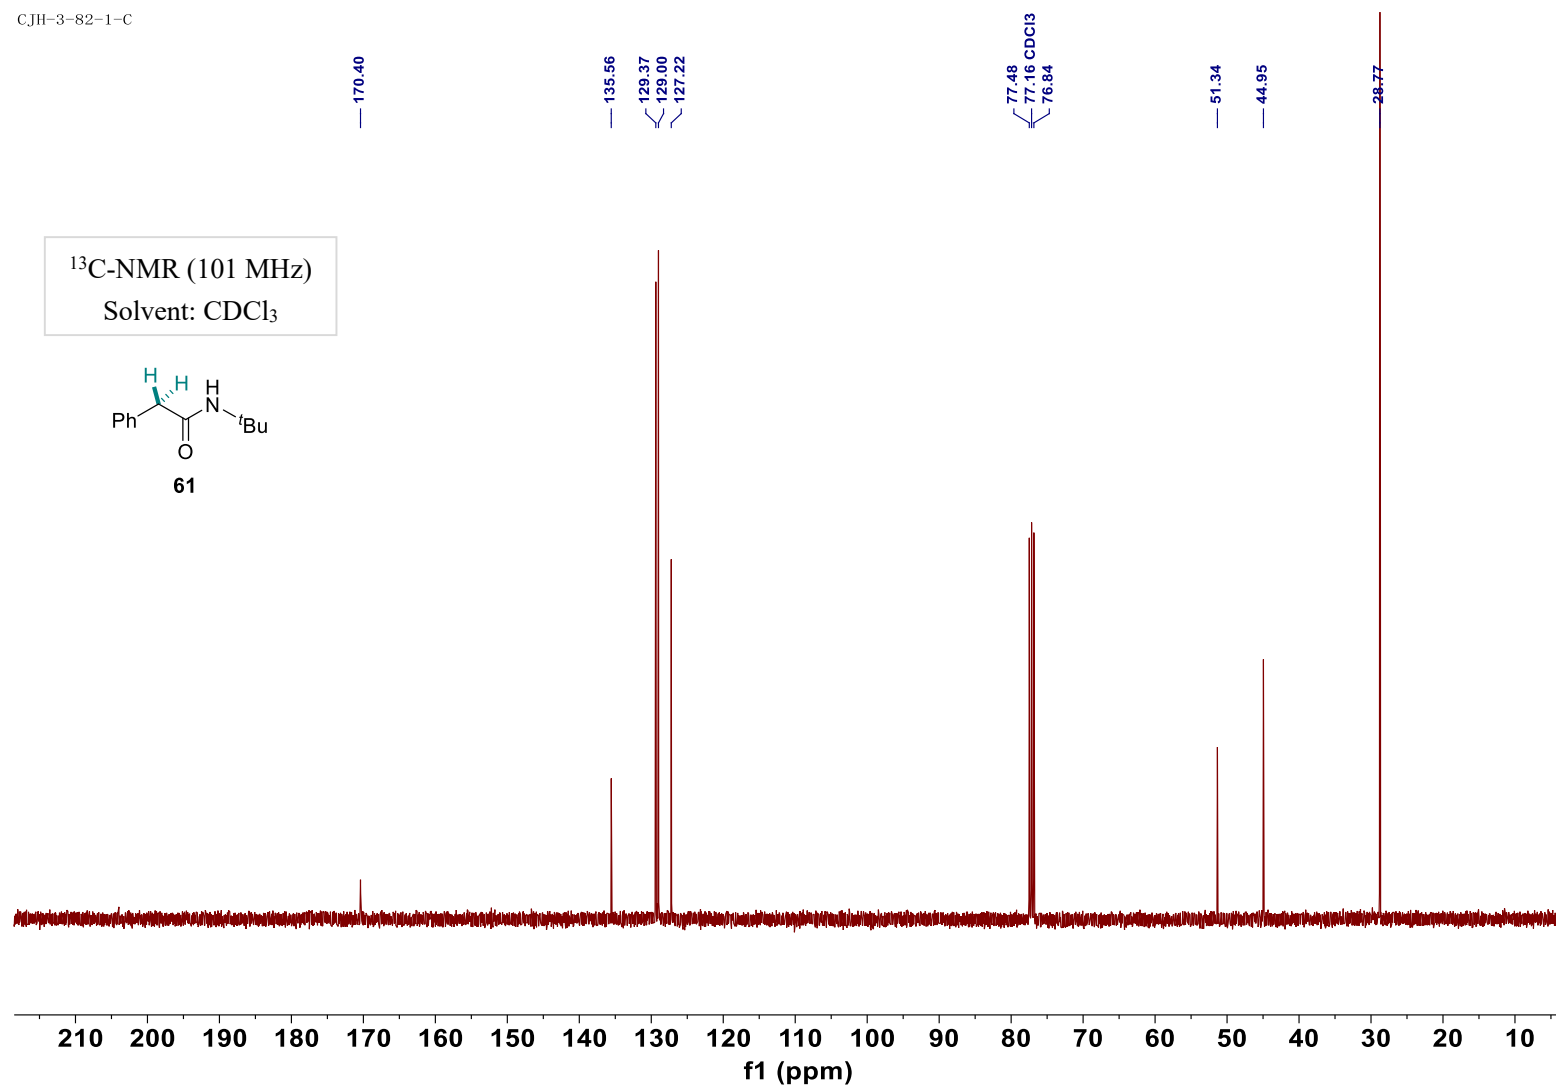

CJH-1-176-1-H

<sup>1</sup>H-NMR (400 MHz)  
Solvent: CDCl<sub>3</sub>

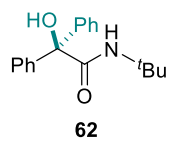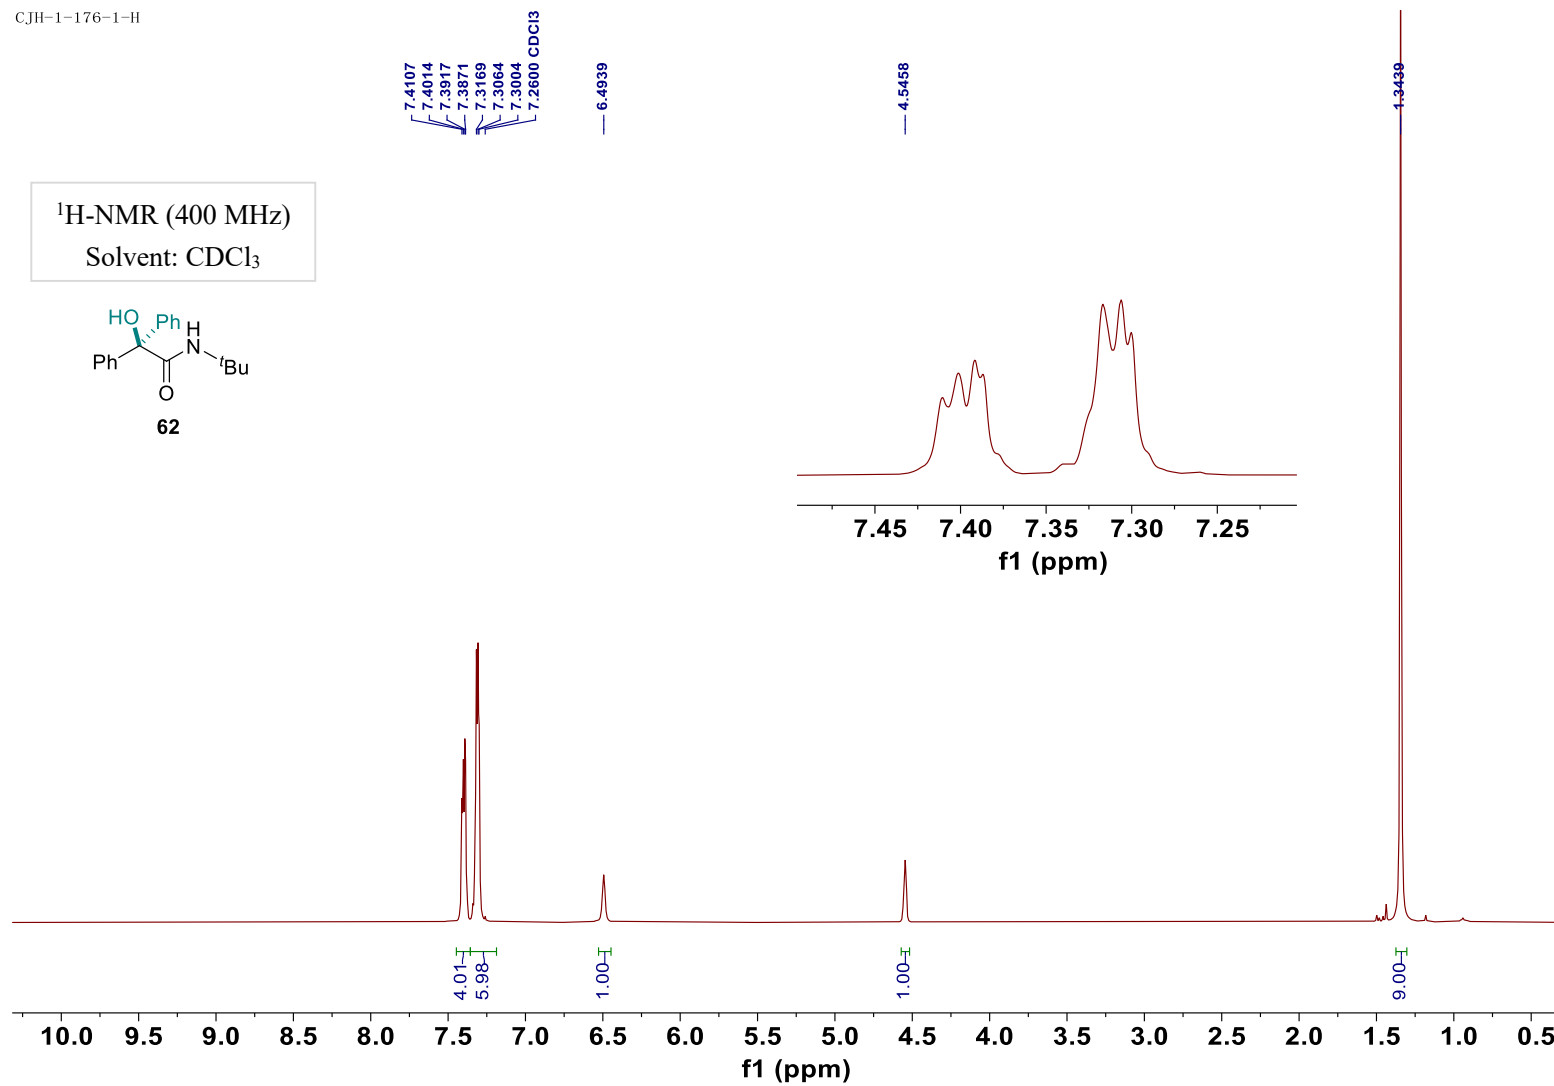

CJH-1-176-1-C

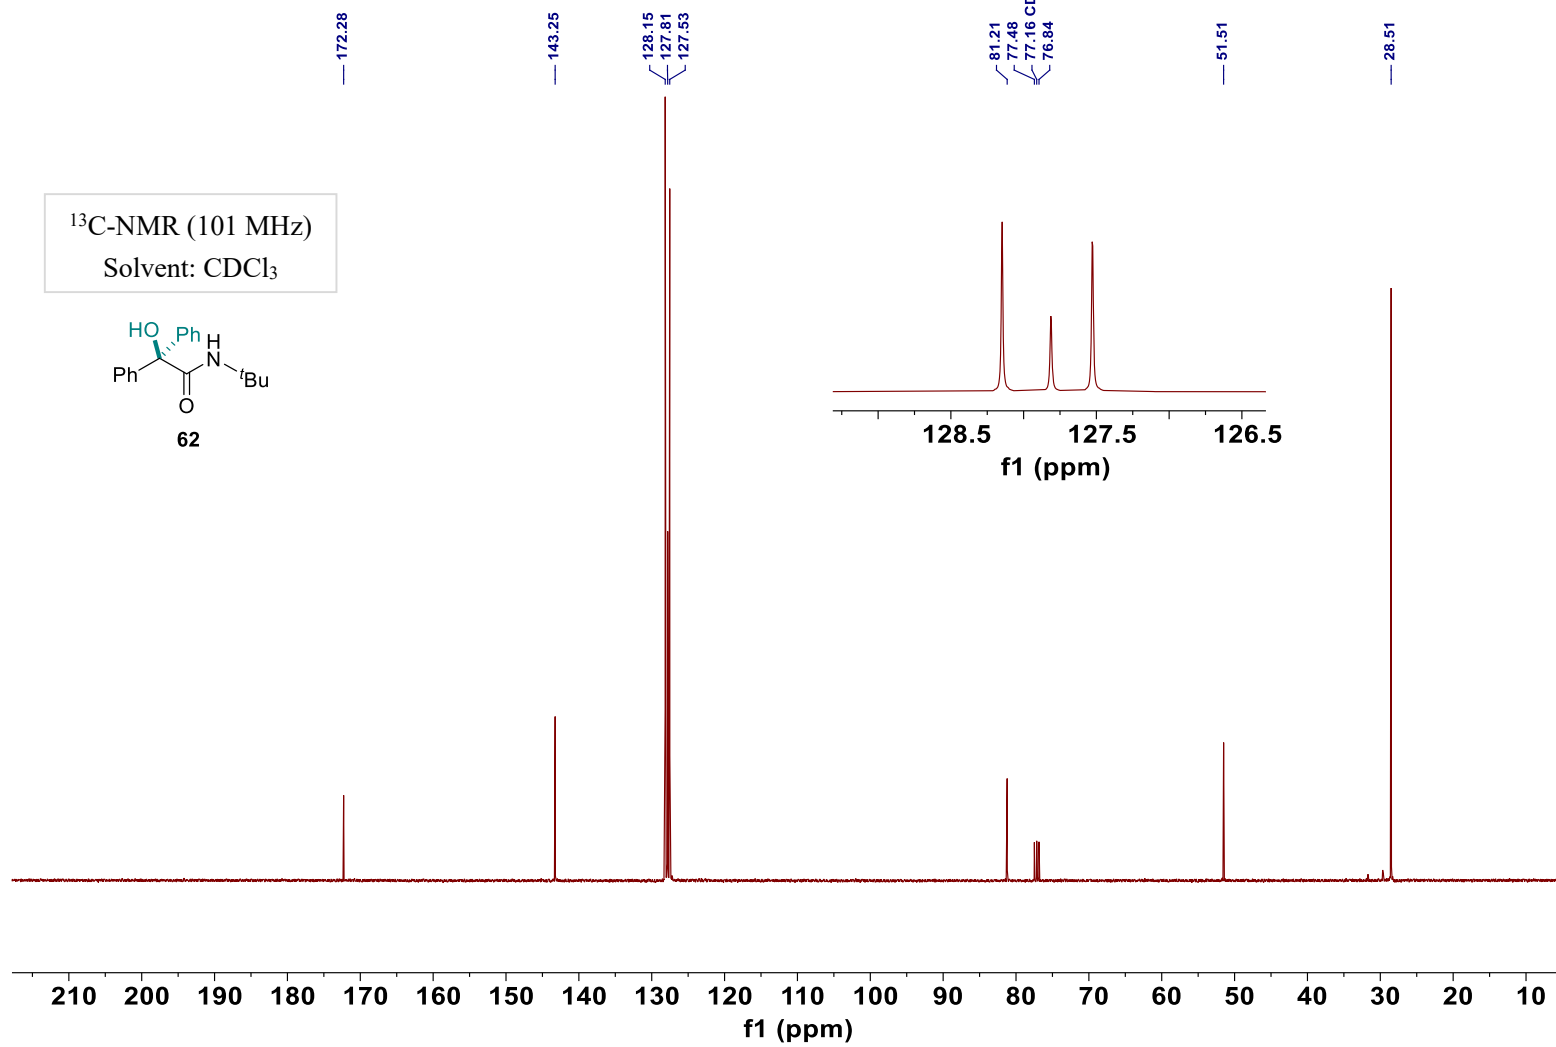

S200

CJH-1-173-1-H

8.2339  
8.2141  
7.6039  
7.5854  
7.5668  
7.4570  
7.4380  
7.4182  
7.2600 CDCl<sub>3</sub>  
7.2464  
7.0176

<sup>1</sup>H-NMR (400 MHz)

Solvent: CDCl<sub>3</sub>

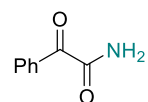

63

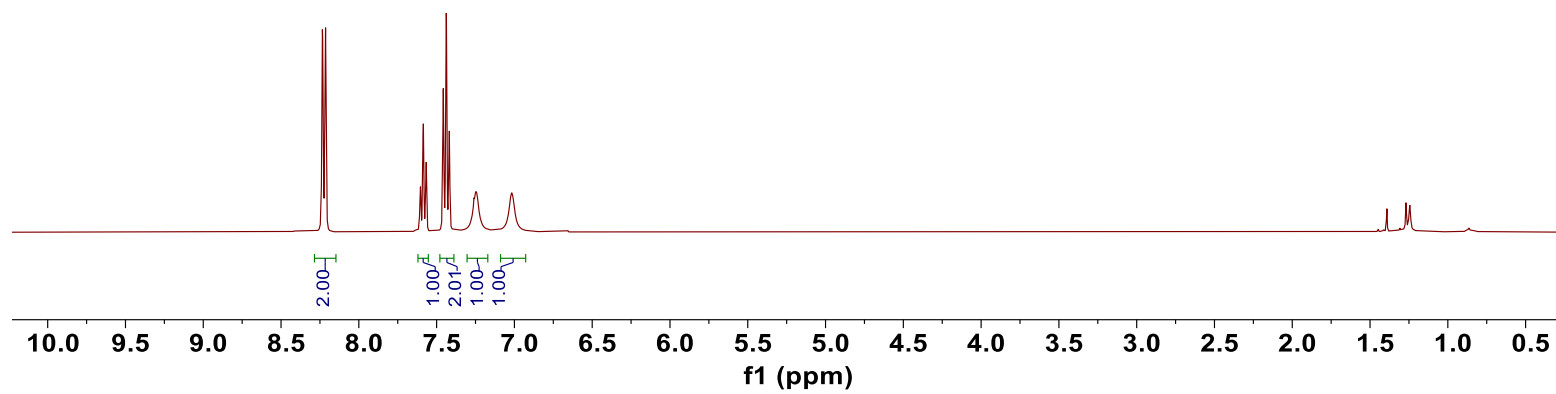

S201



CJH-1-173-1-C

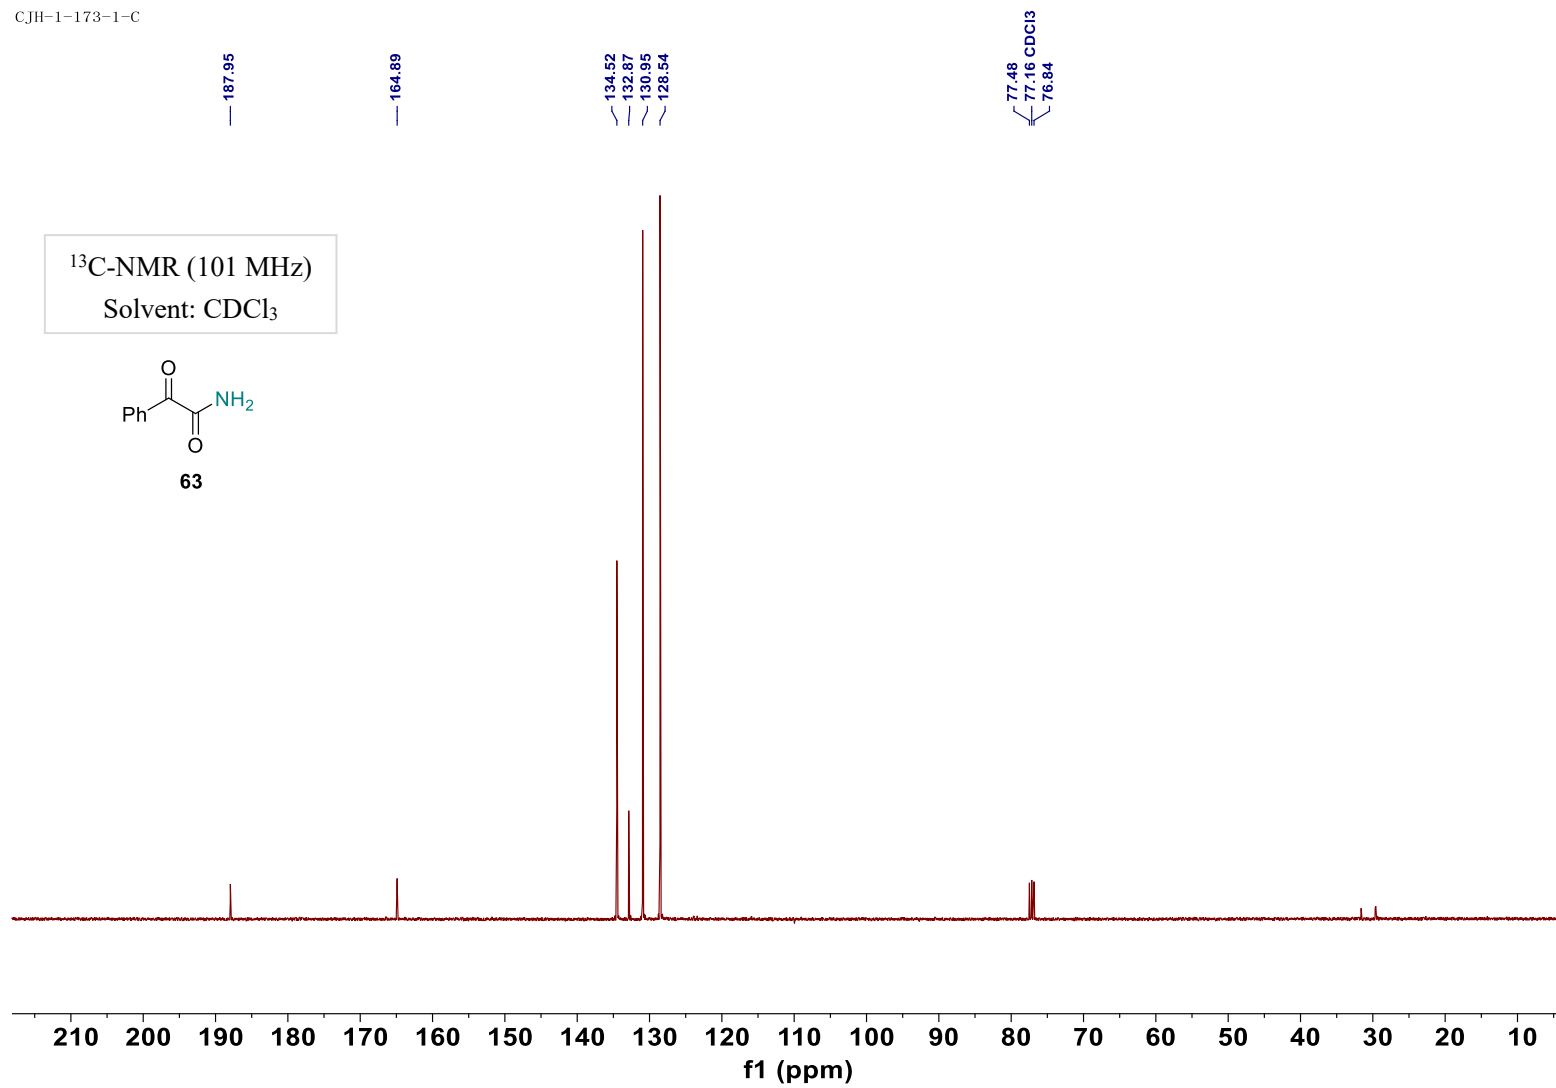

S202

CJH-1-184-1-H

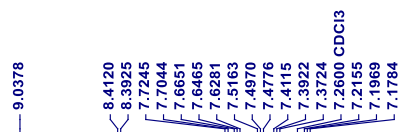

<sup>1</sup>H-NMR (400 MHz)

Solvent: CDCl<sub>3</sub>

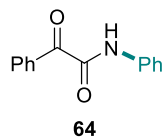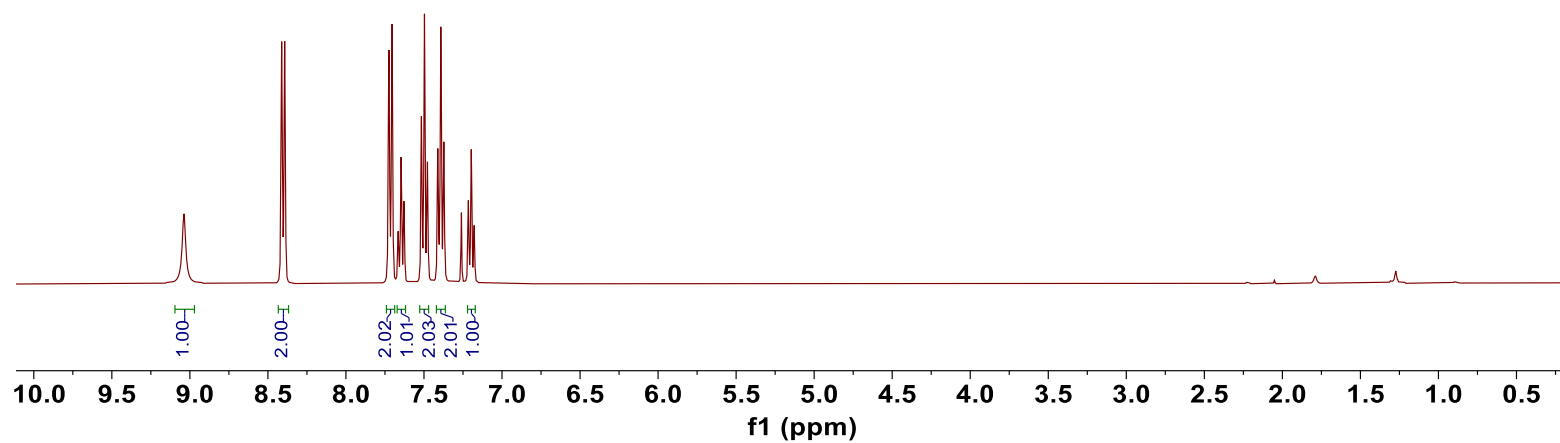

S203

CJH-1-184-1-C

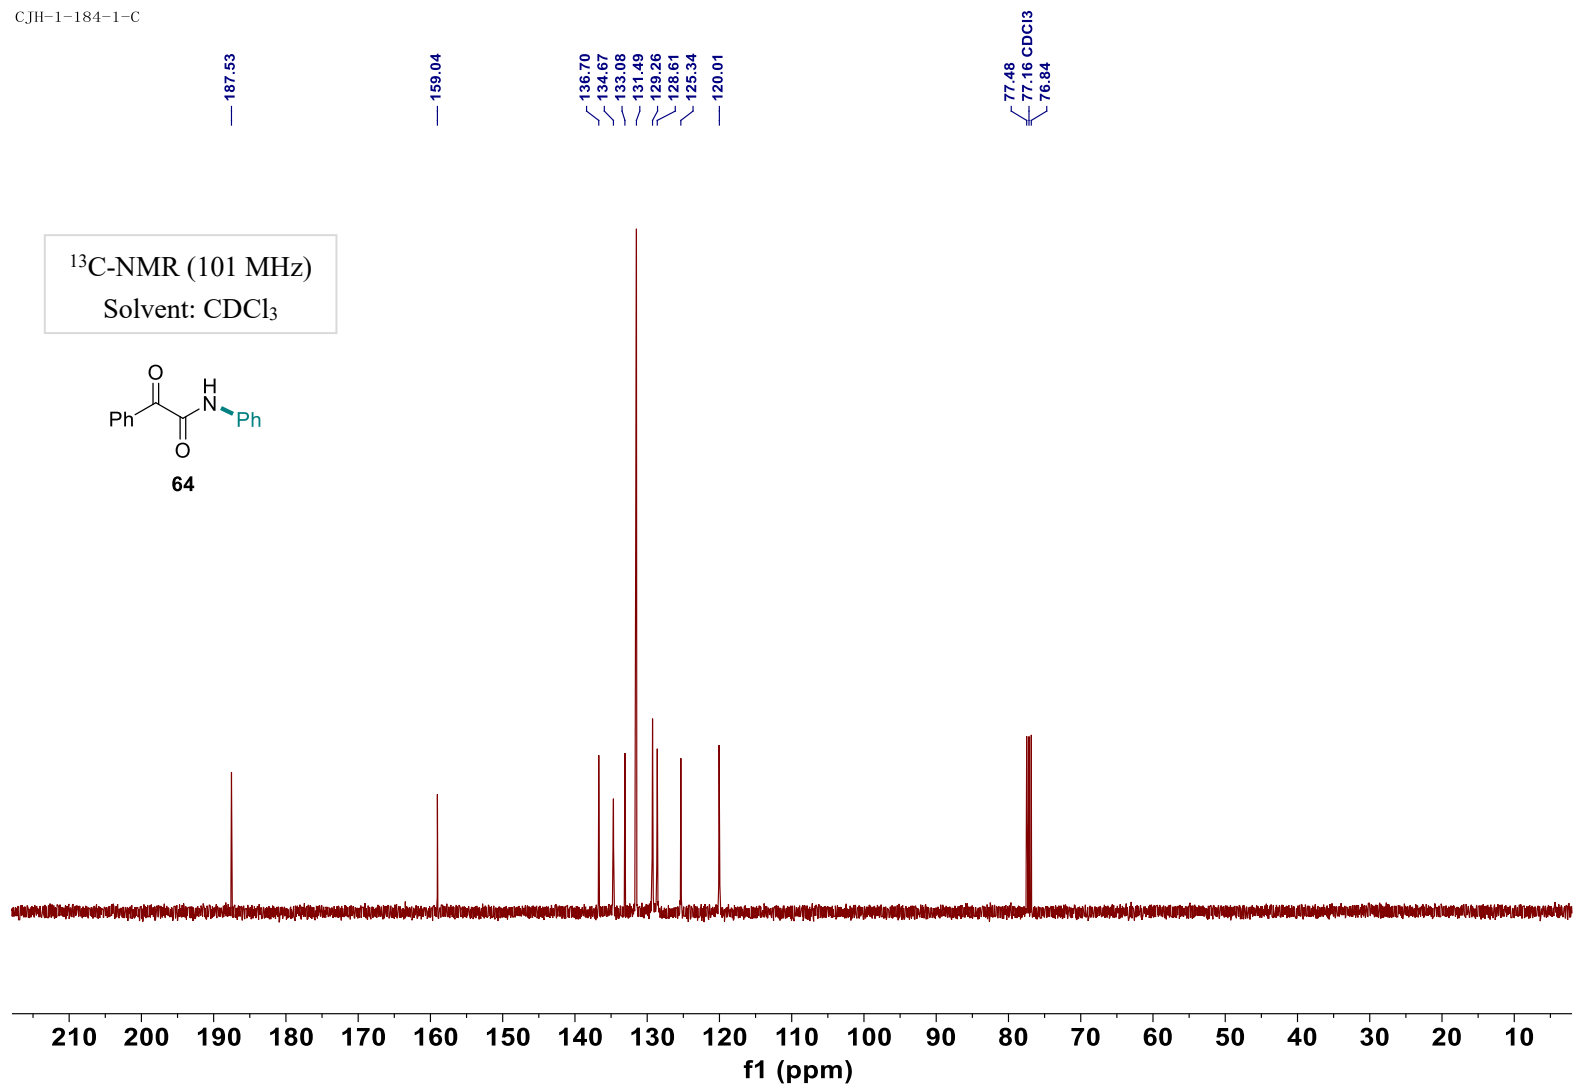

S204

CJH-1-174-2-H

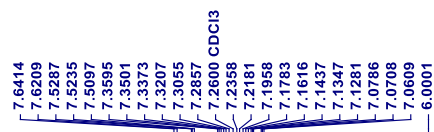

<sup>1</sup>H-NMR (400 MHz)

Solvent: CDCl<sub>3</sub>

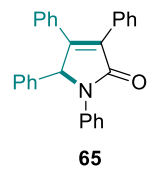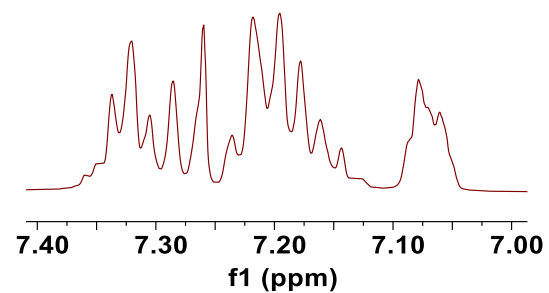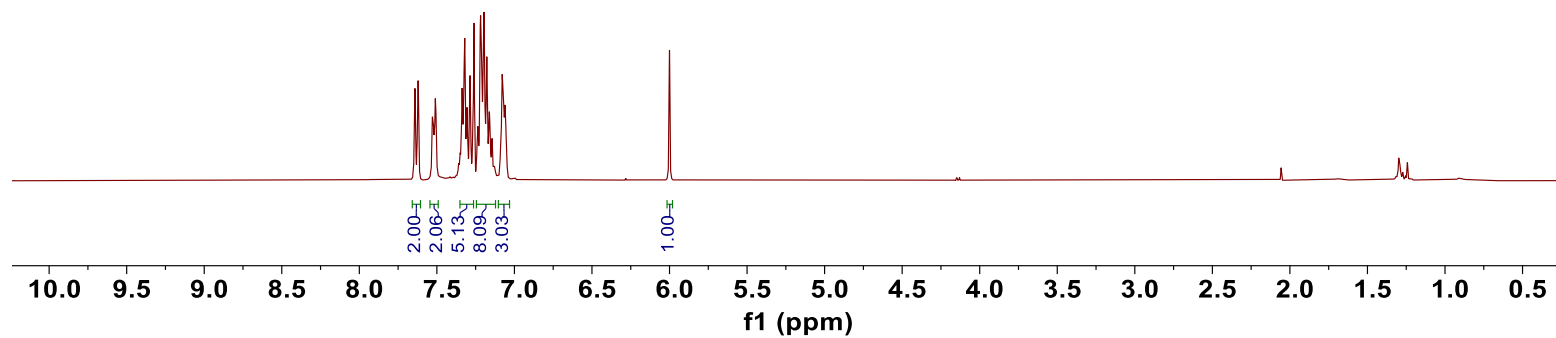

S205

CJH-1-174-2-C

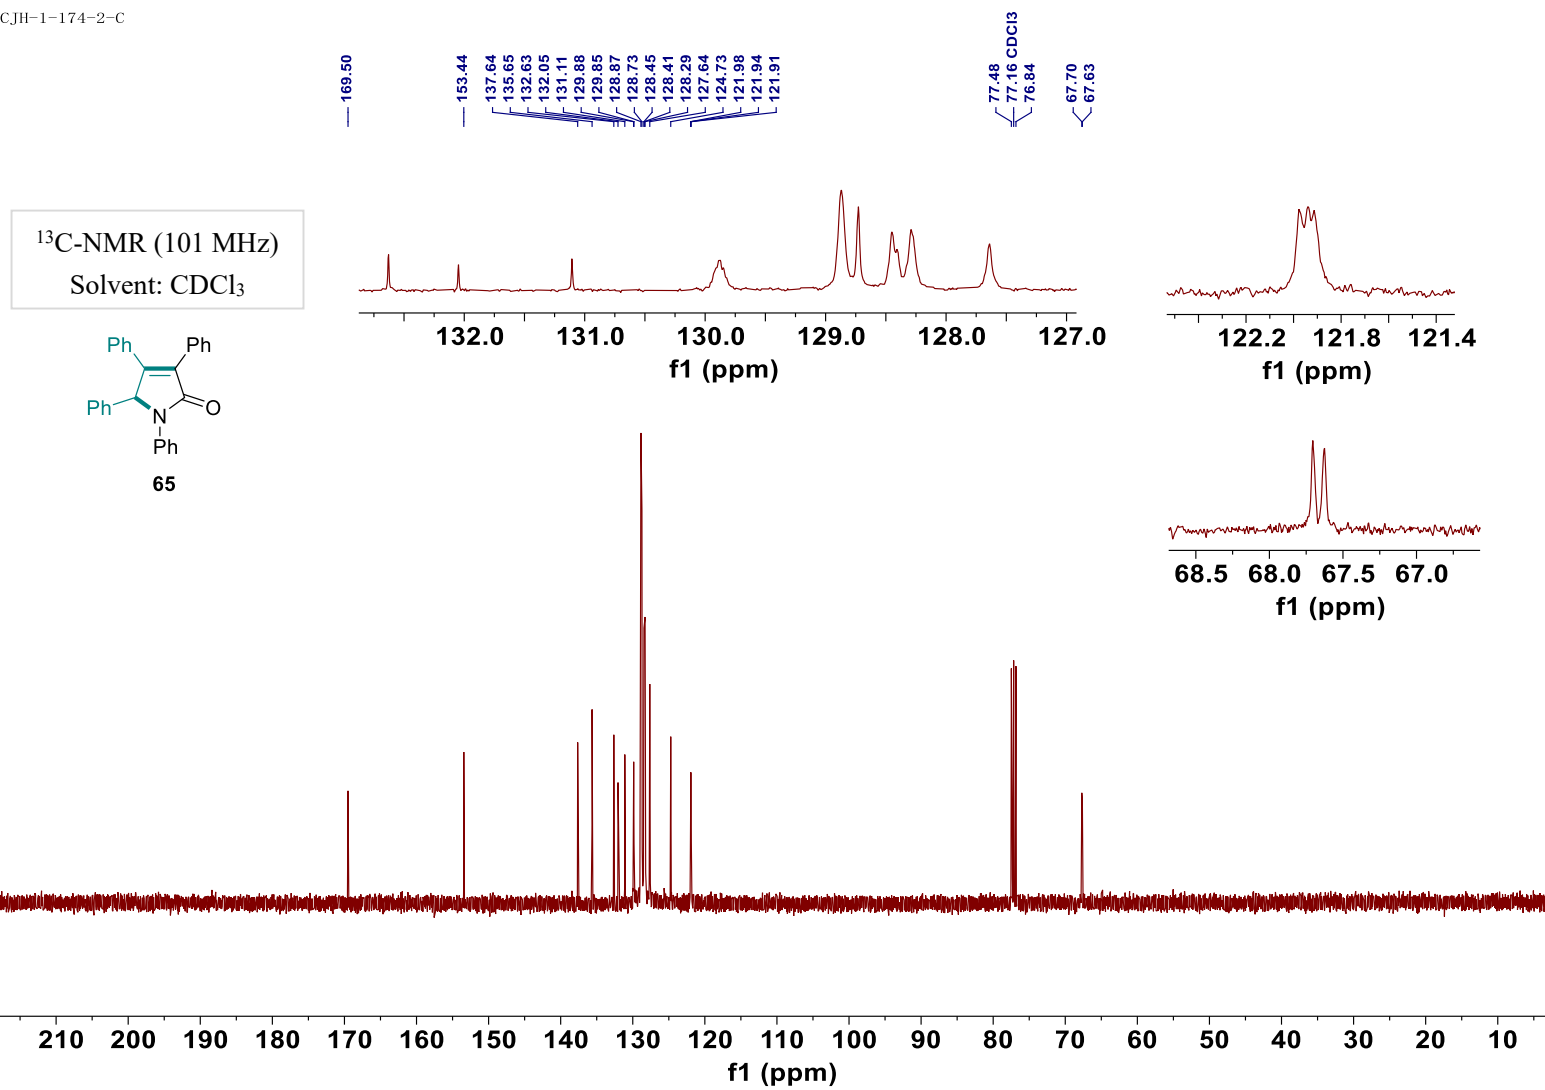

CJH-1-139-1-H

<sup>1</sup>H-NMR (400 MHz)  
Solvent: CDCl<sub>3</sub>

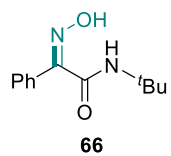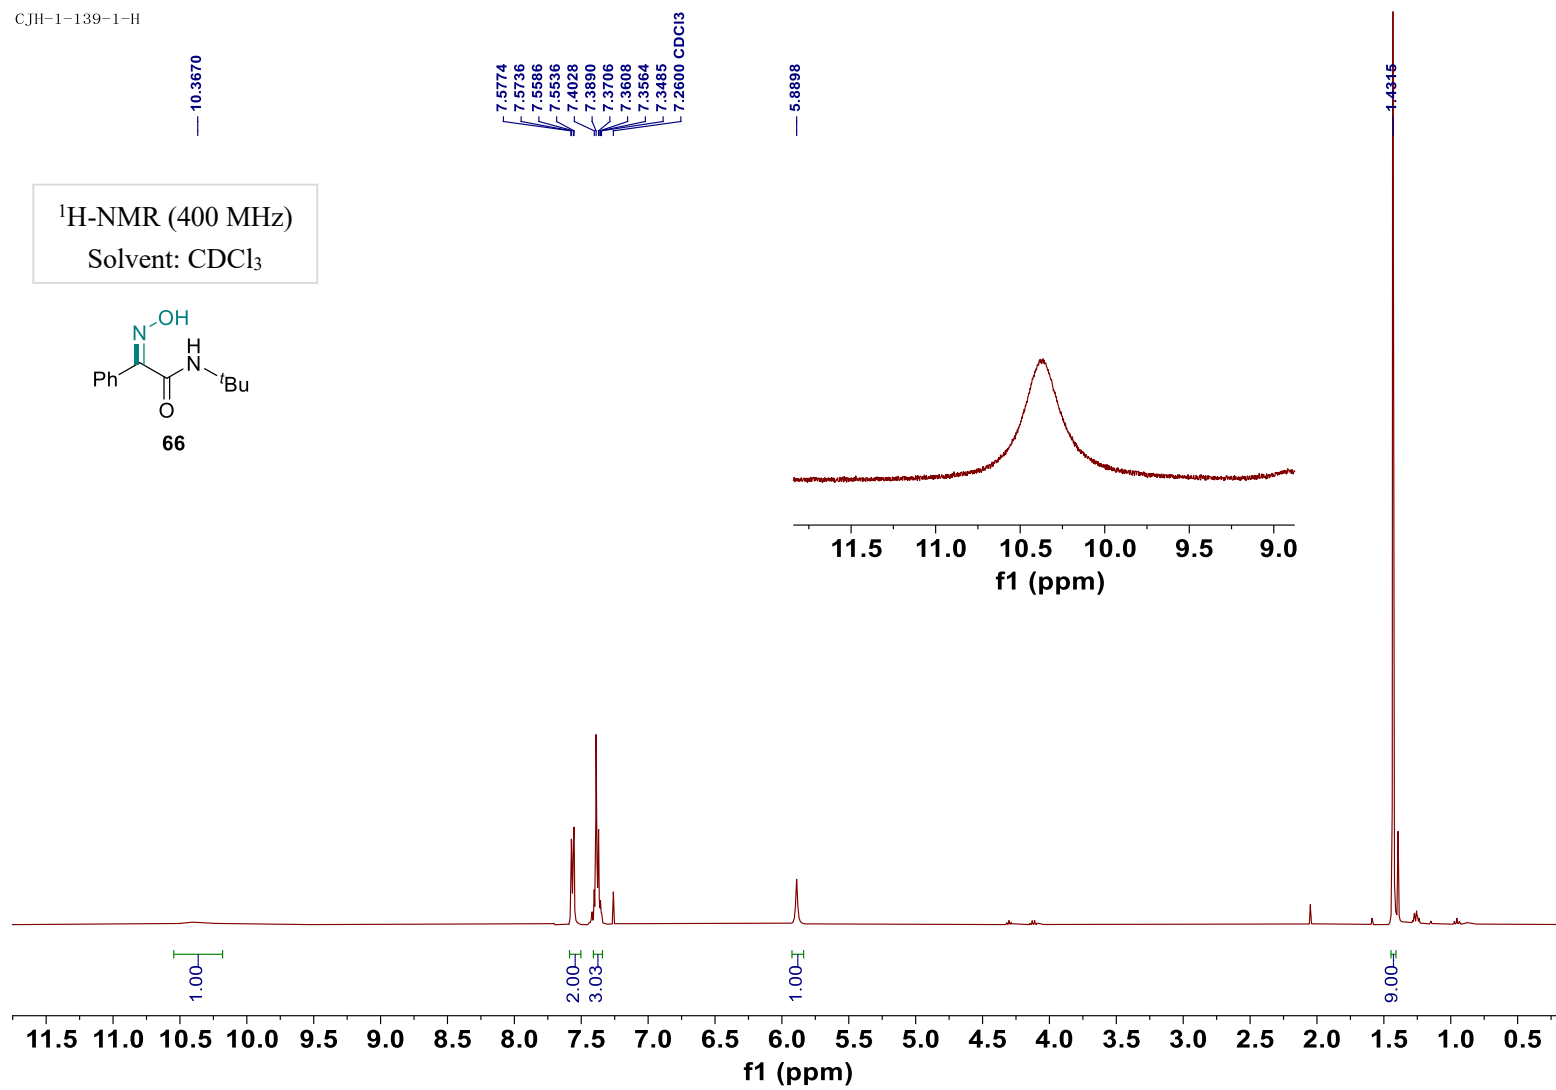

CJH-1-139-1-C

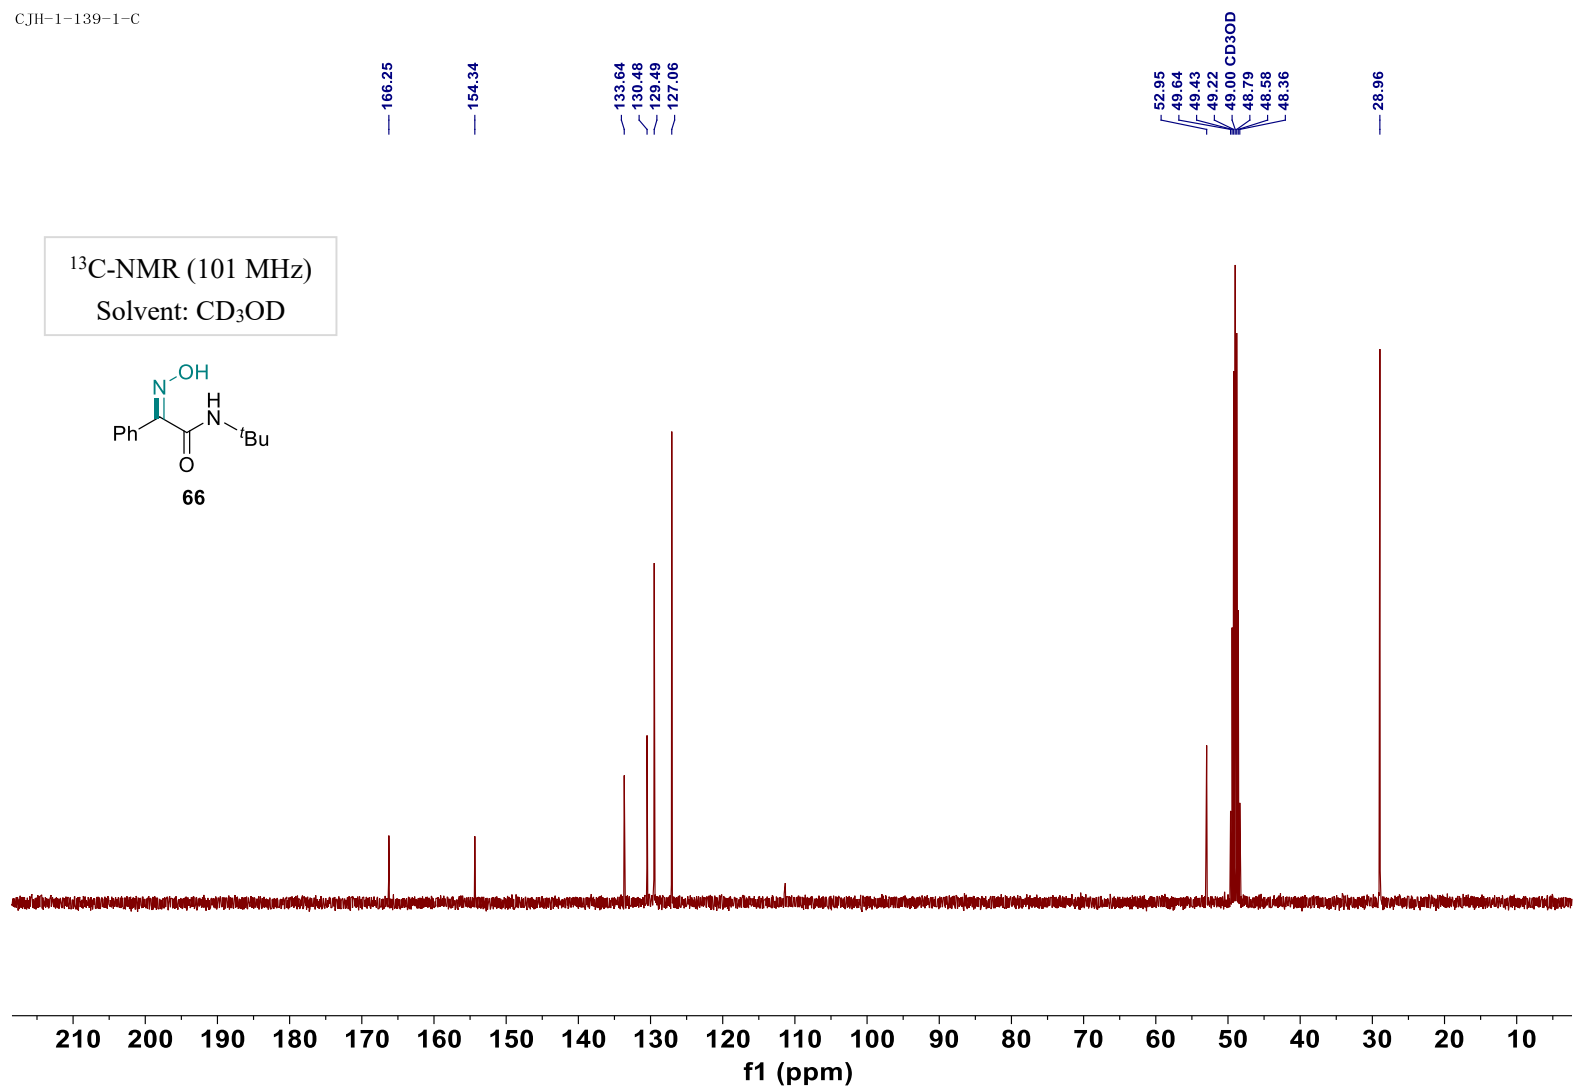

S208

CJH-2-26-2-H

<sup>1</sup>H-NMR (400 MHz)  
Solvent: CDCl<sub>3</sub>

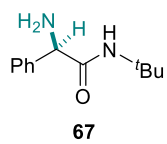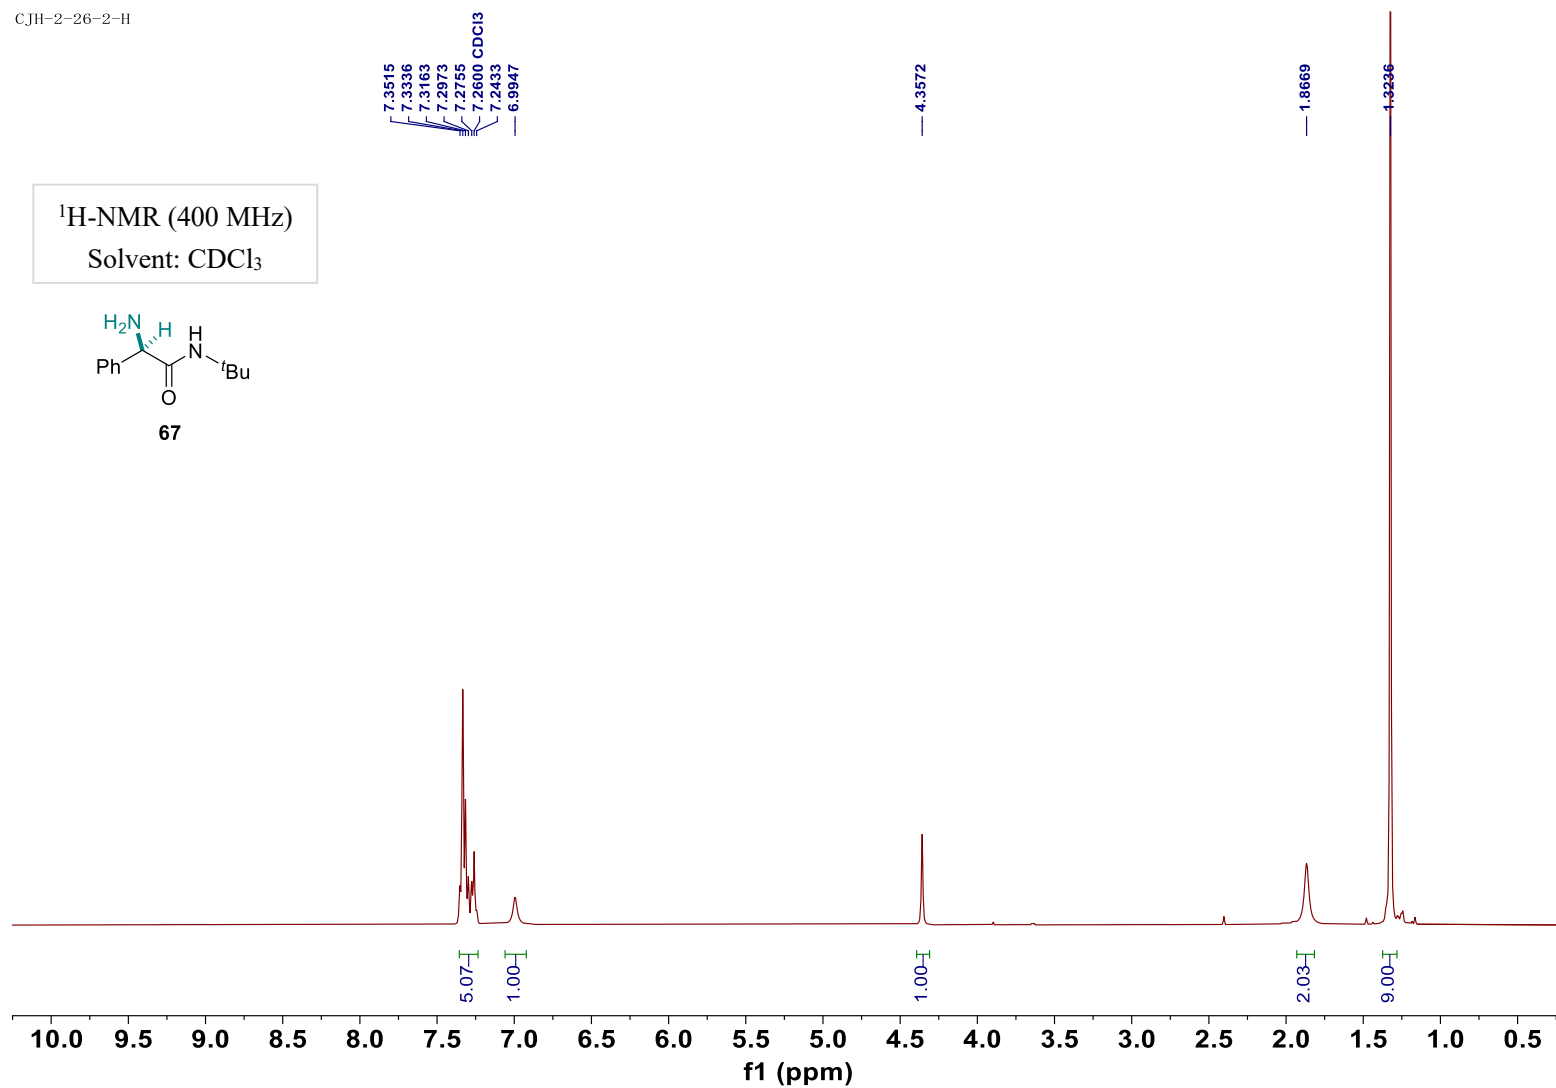

S209



CJH-2-26-2-C

$^{13}\text{C}$ -NMR (101 MHz)  
Solvent:  $\text{CDCl}_3$

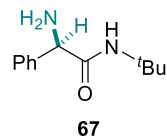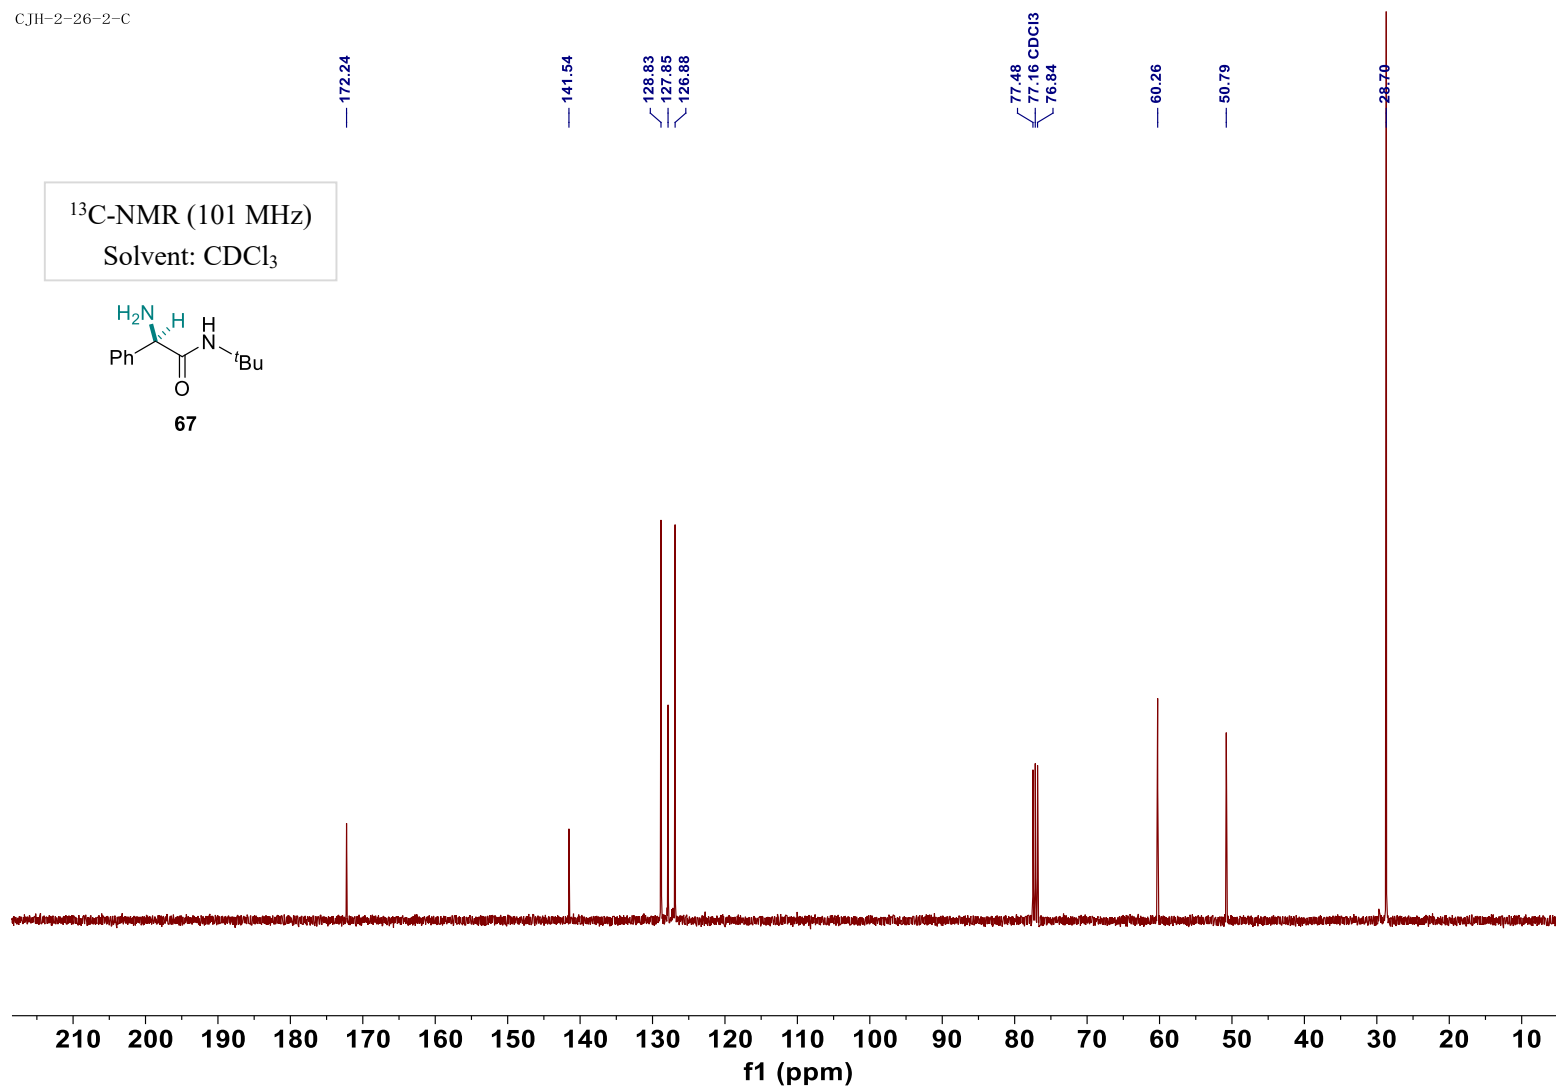

CJH-3-138-1-H

<sup>1</sup>H-NMR (400 MHz)  
Solvent: CDCl<sub>3</sub>

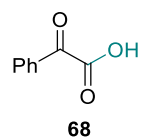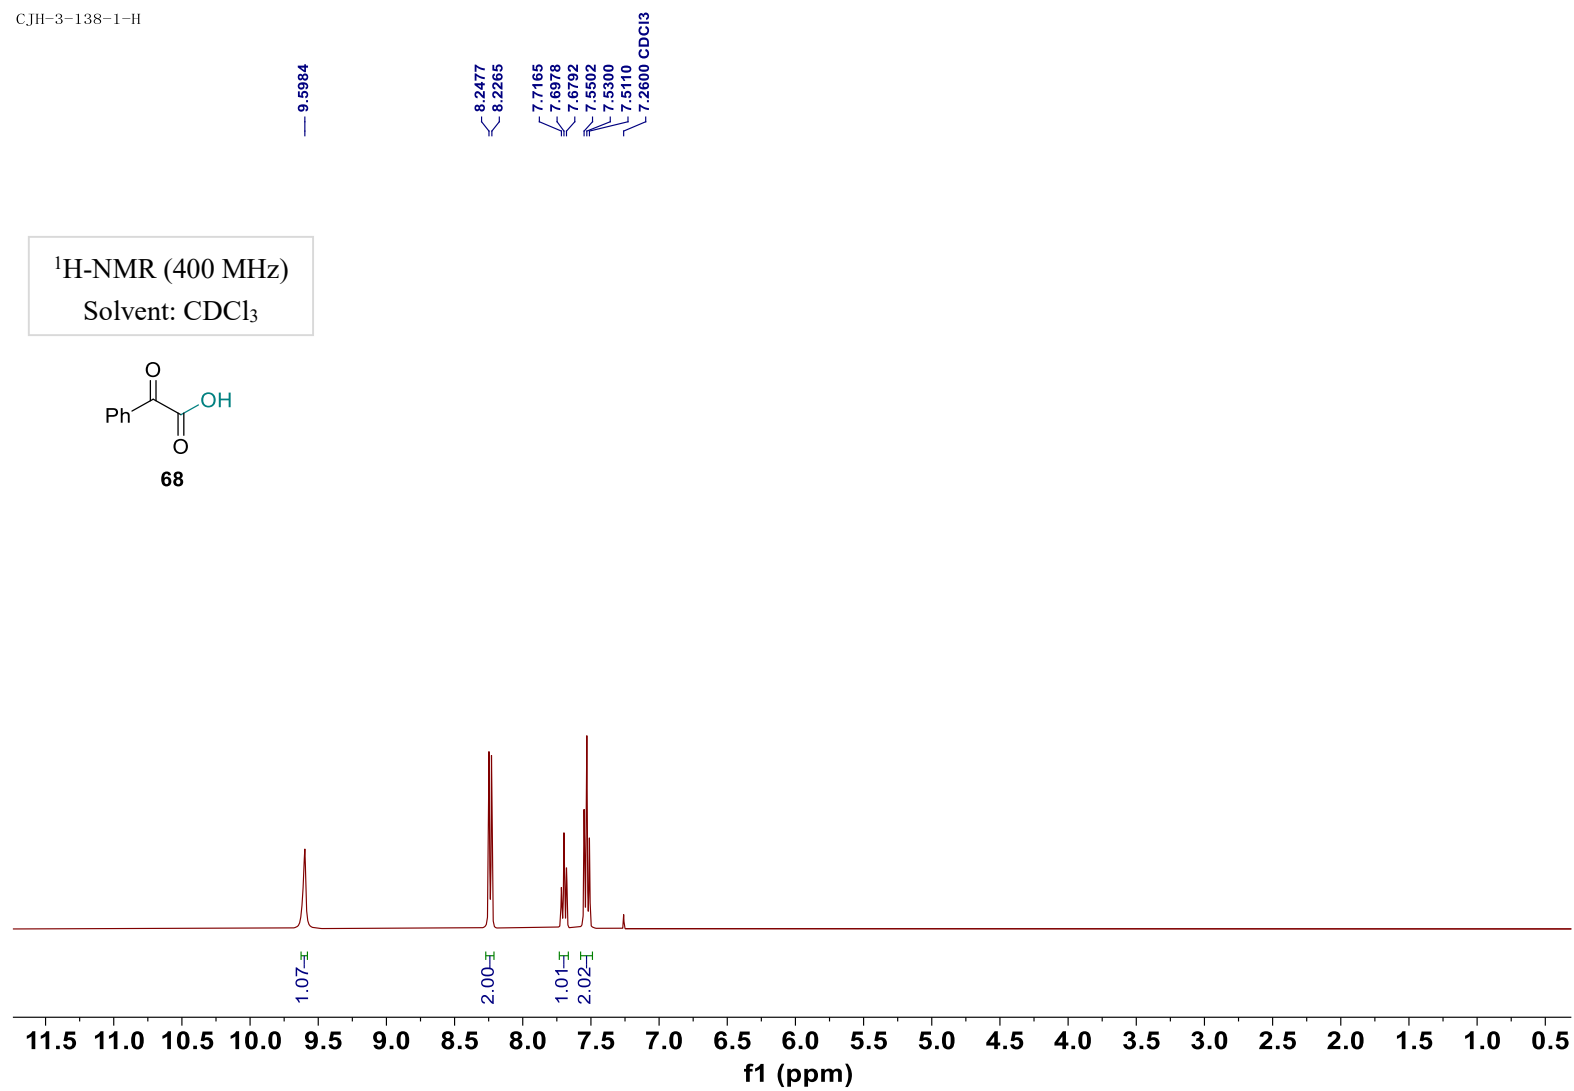

S211

CJH-3-138-1-C

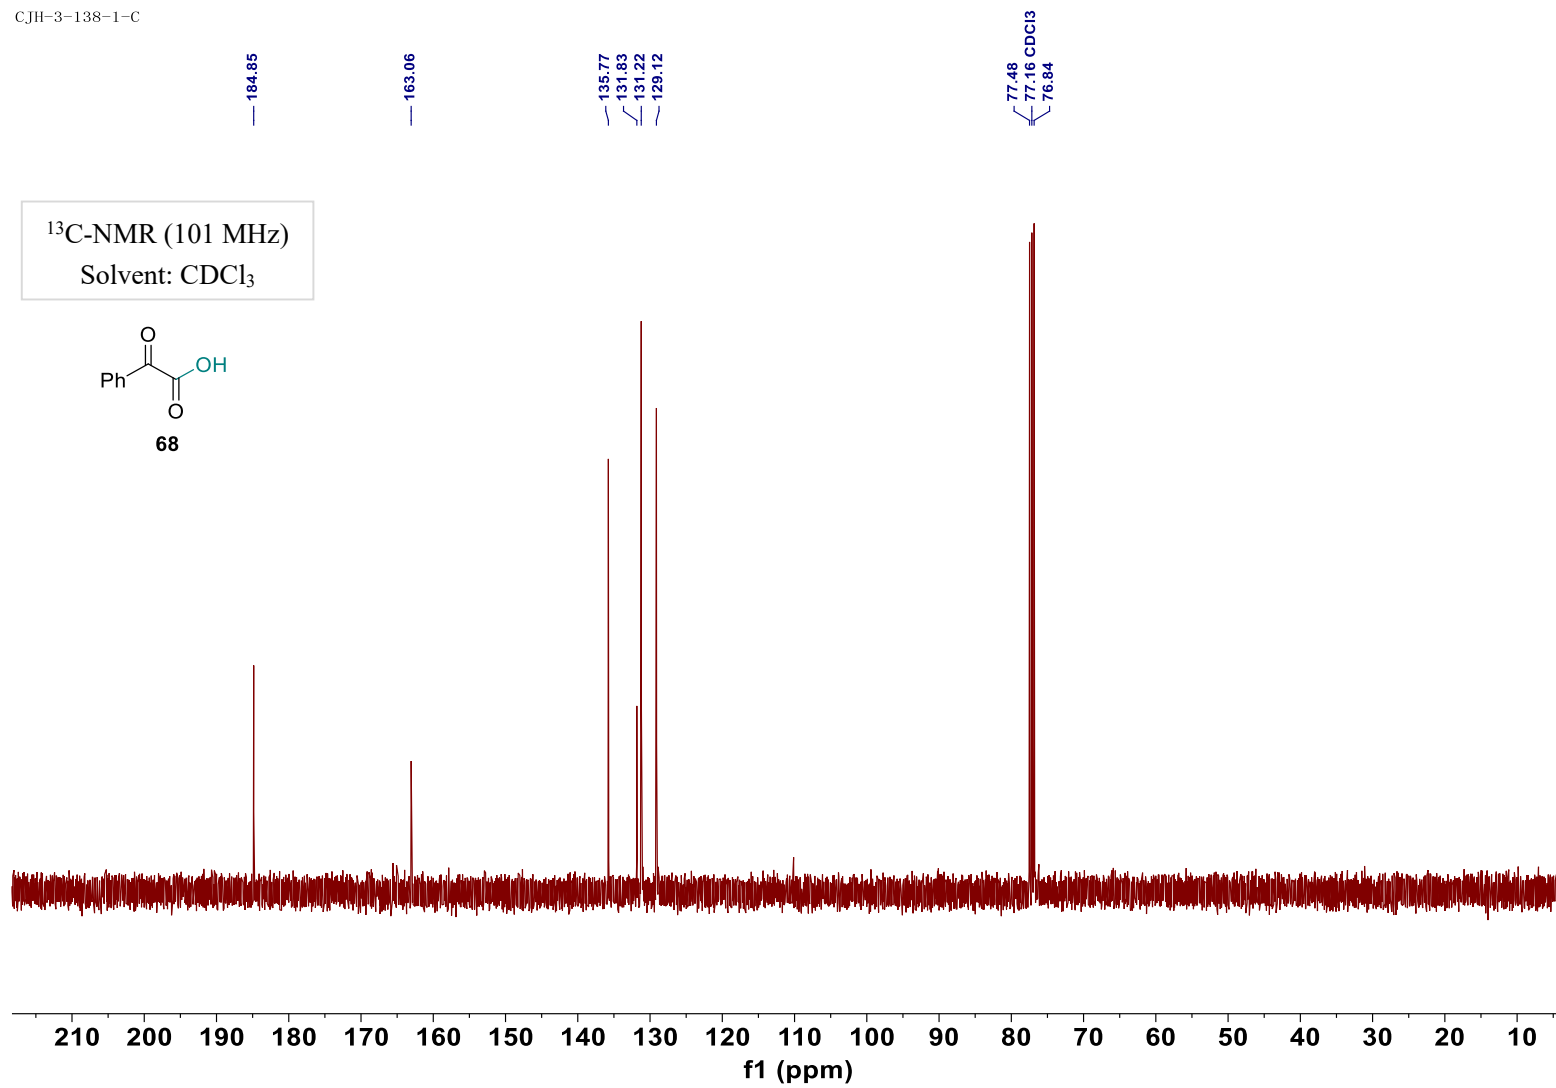

S212

CJH-3-139-1-H

$^1\text{H}$ -NMR (400 MHz)

Solvent:  $\text{D}_2\text{O}$

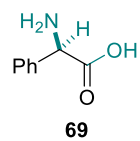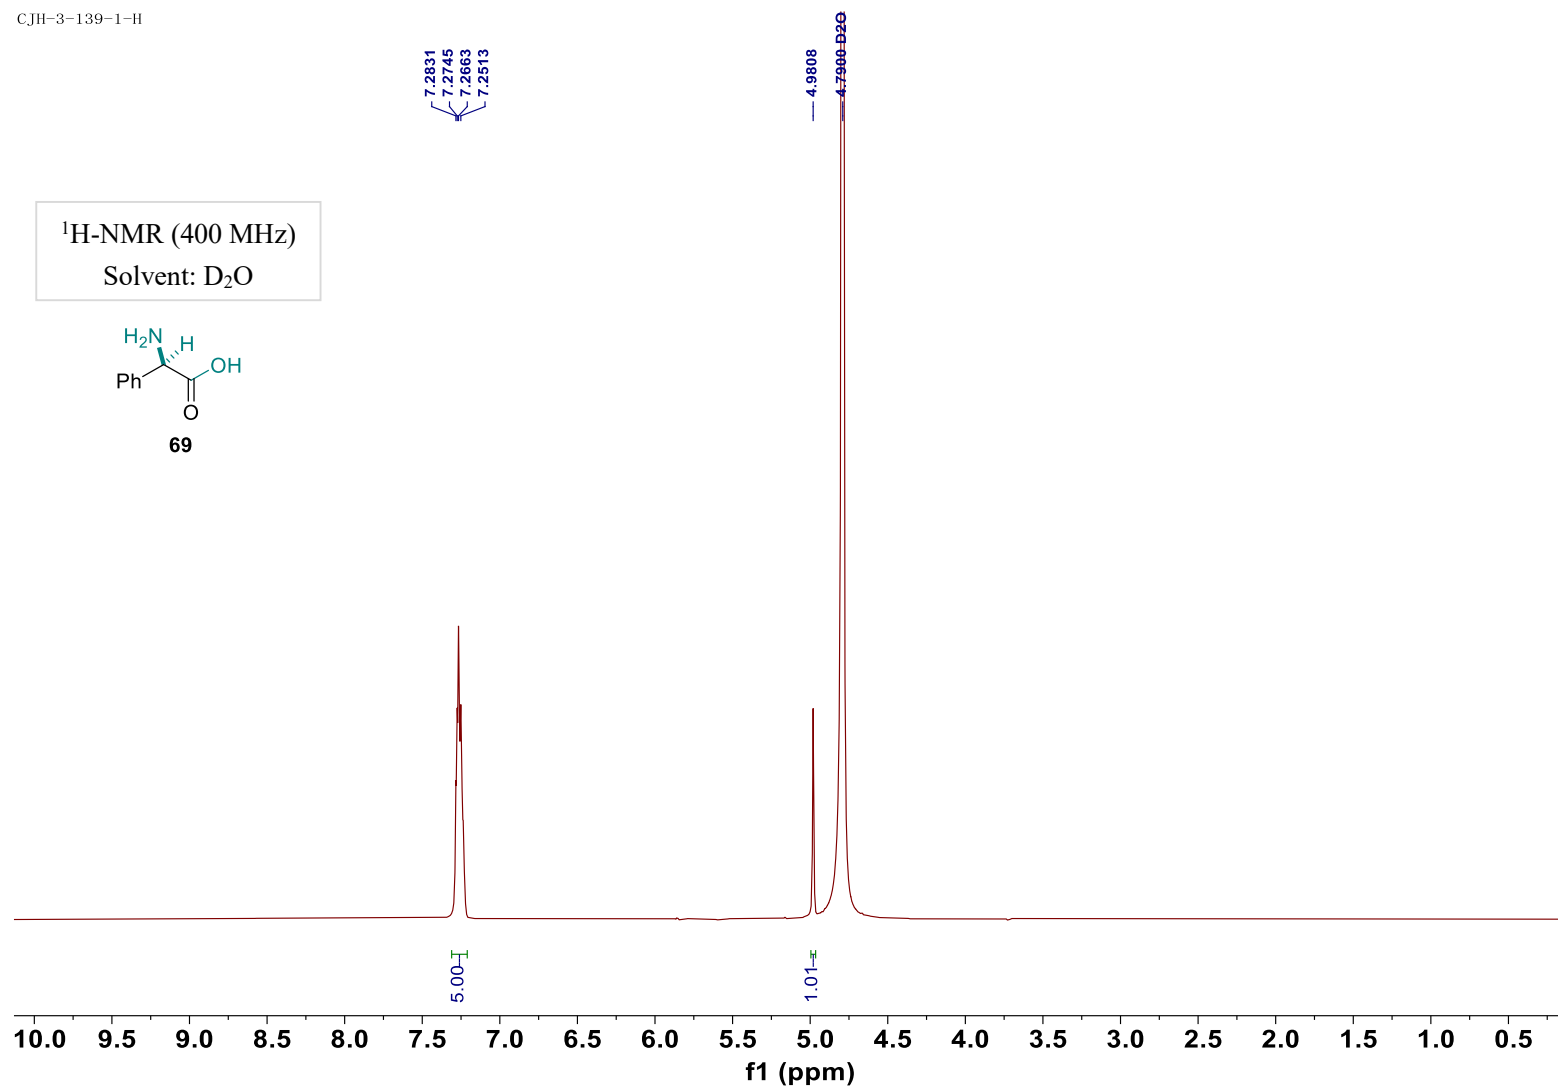

S213

CJH-3-139-1-C

— 170.48

131.07  
130.29  
129.60  
127.99

— 56.34

$^{13}\text{C}$ -NMR (101 MHz)

Solvent: D<sub>2</sub>O

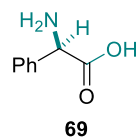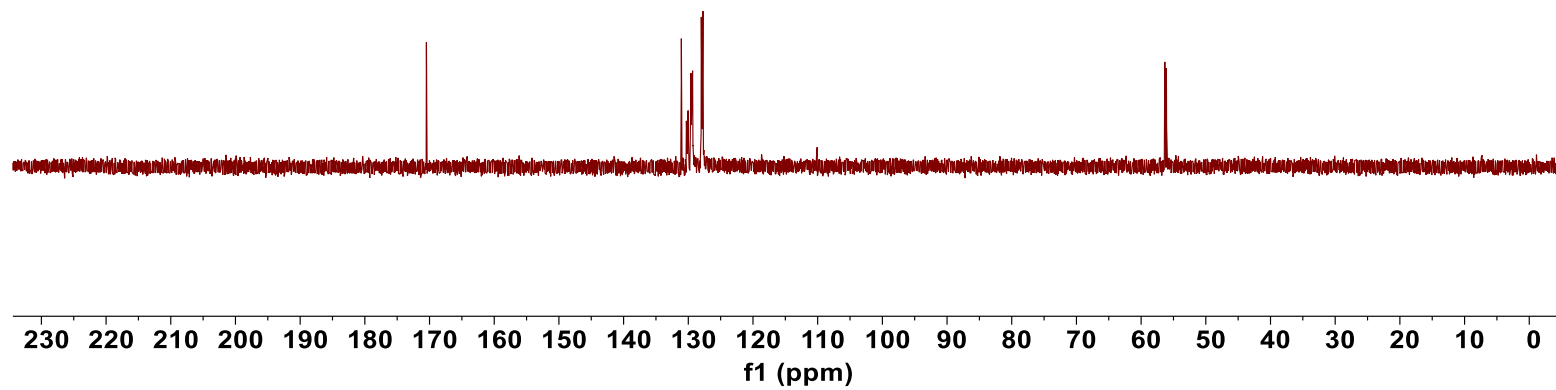

S214

CJH-1-148-3-H

<sup>1</sup>H-NMR (400 MHz)  
Solvent: CDCl<sub>3</sub>

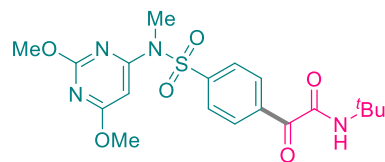

70

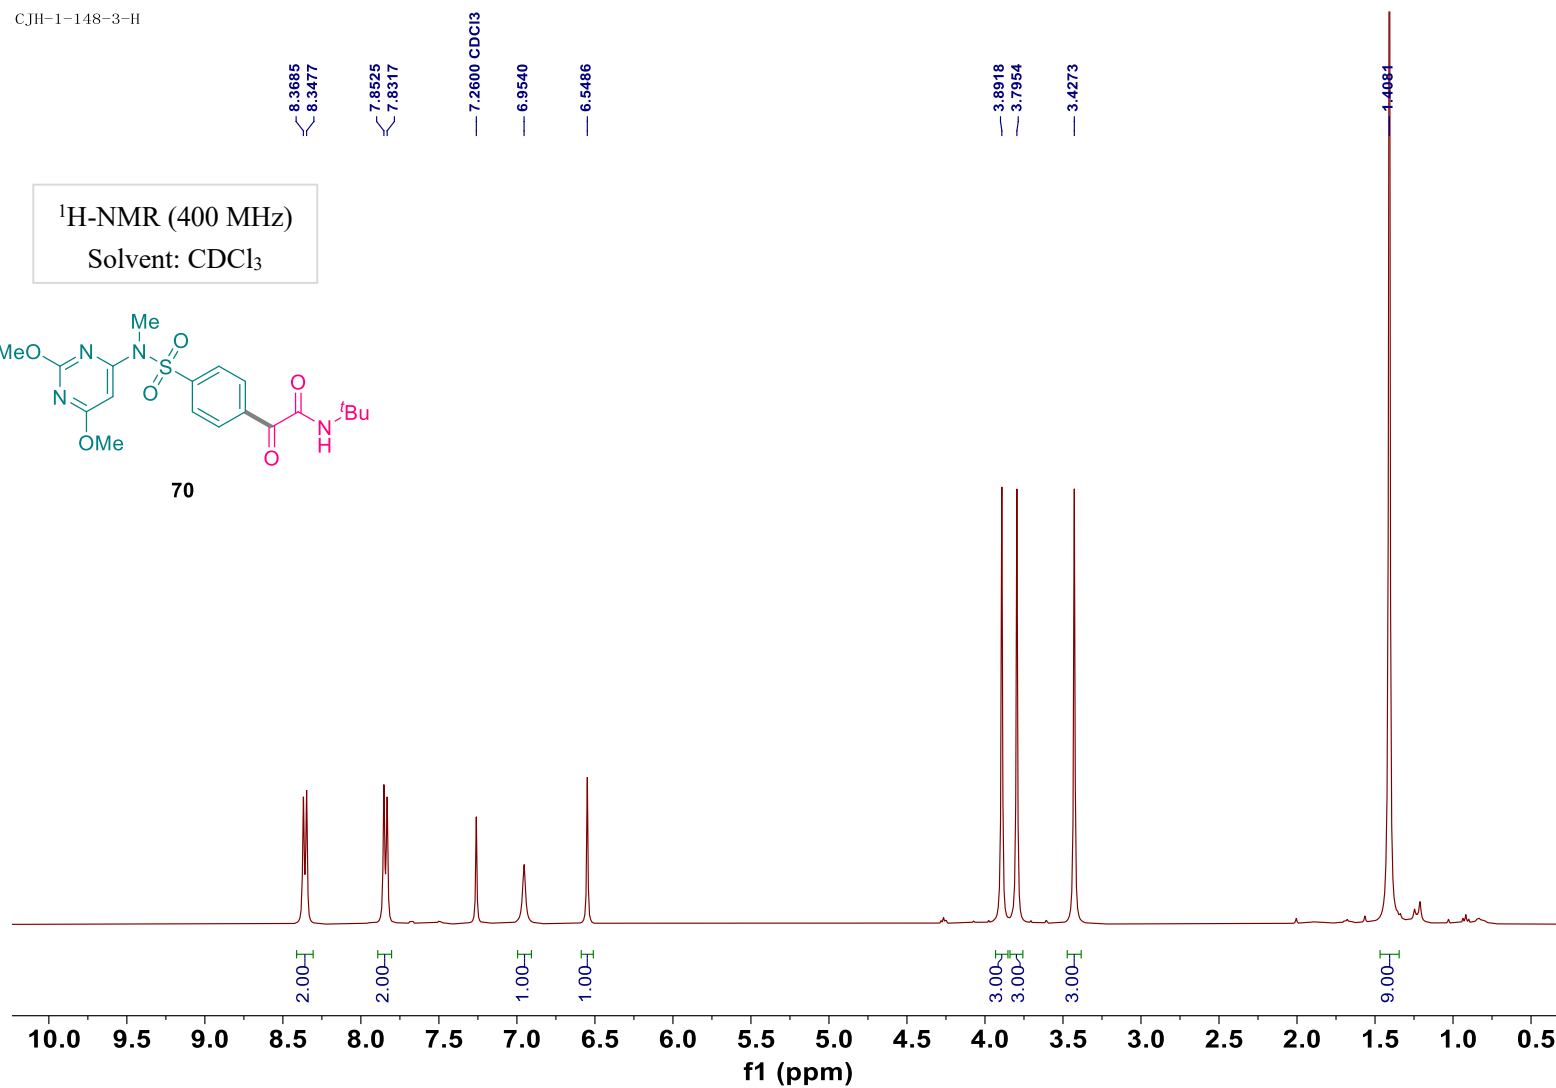

S215

CJH-1-148-3-C

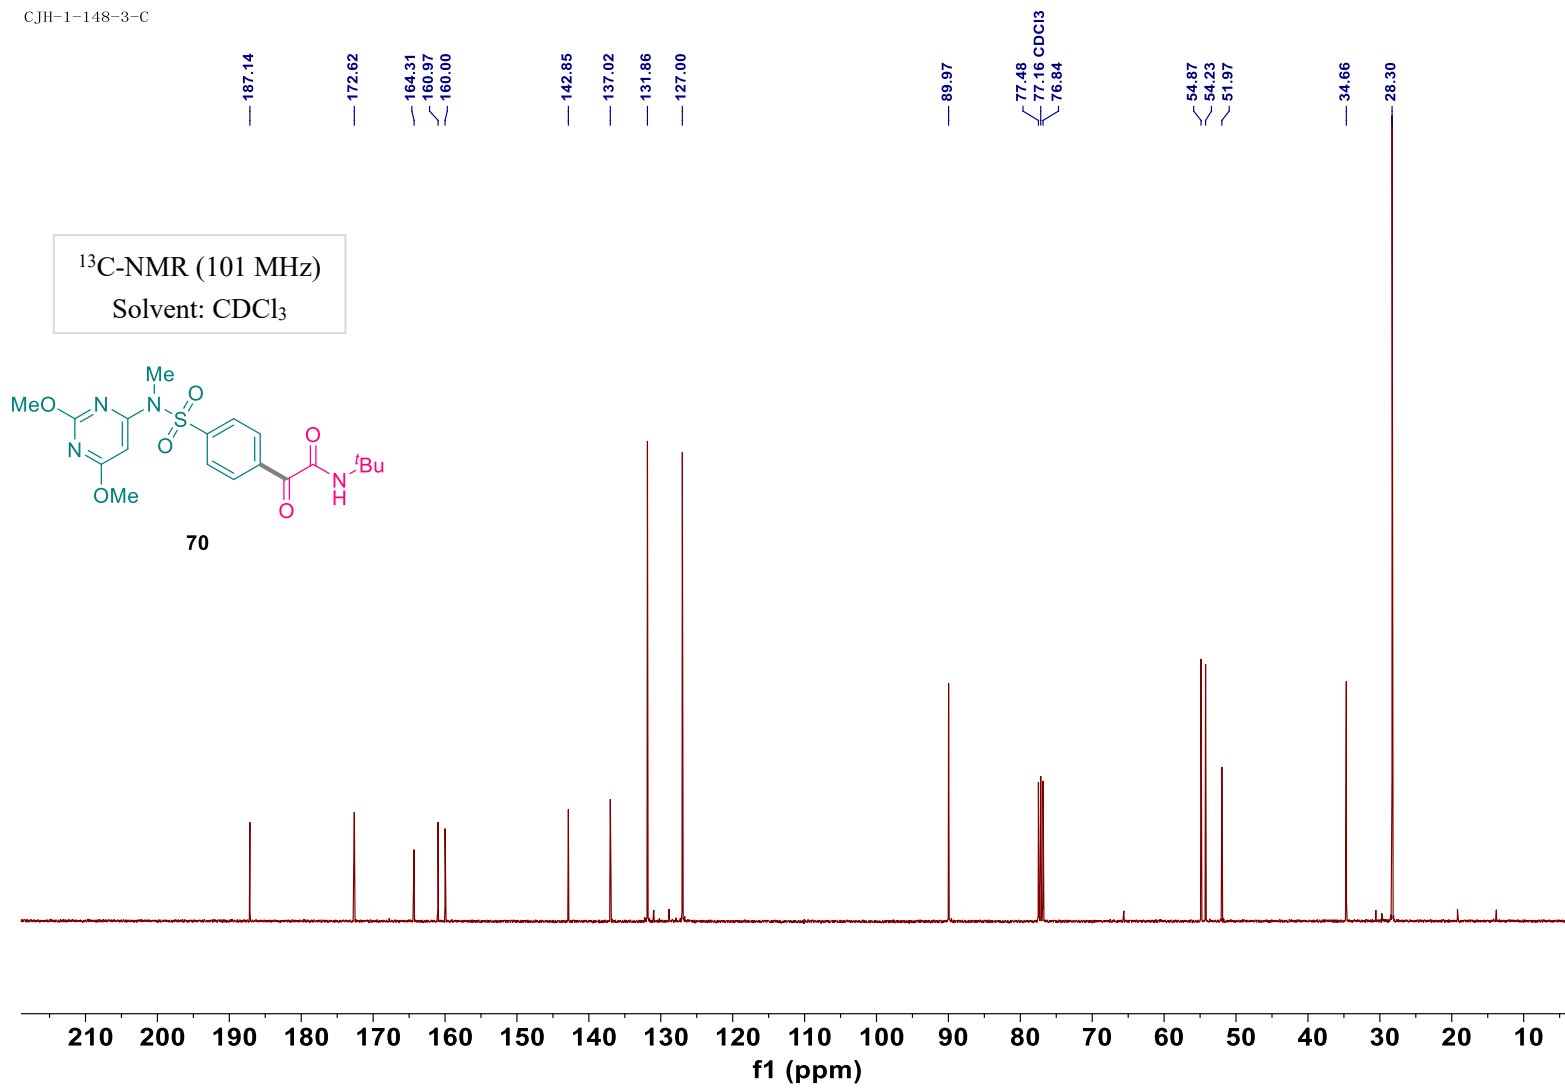

CJH-1-140-2-H

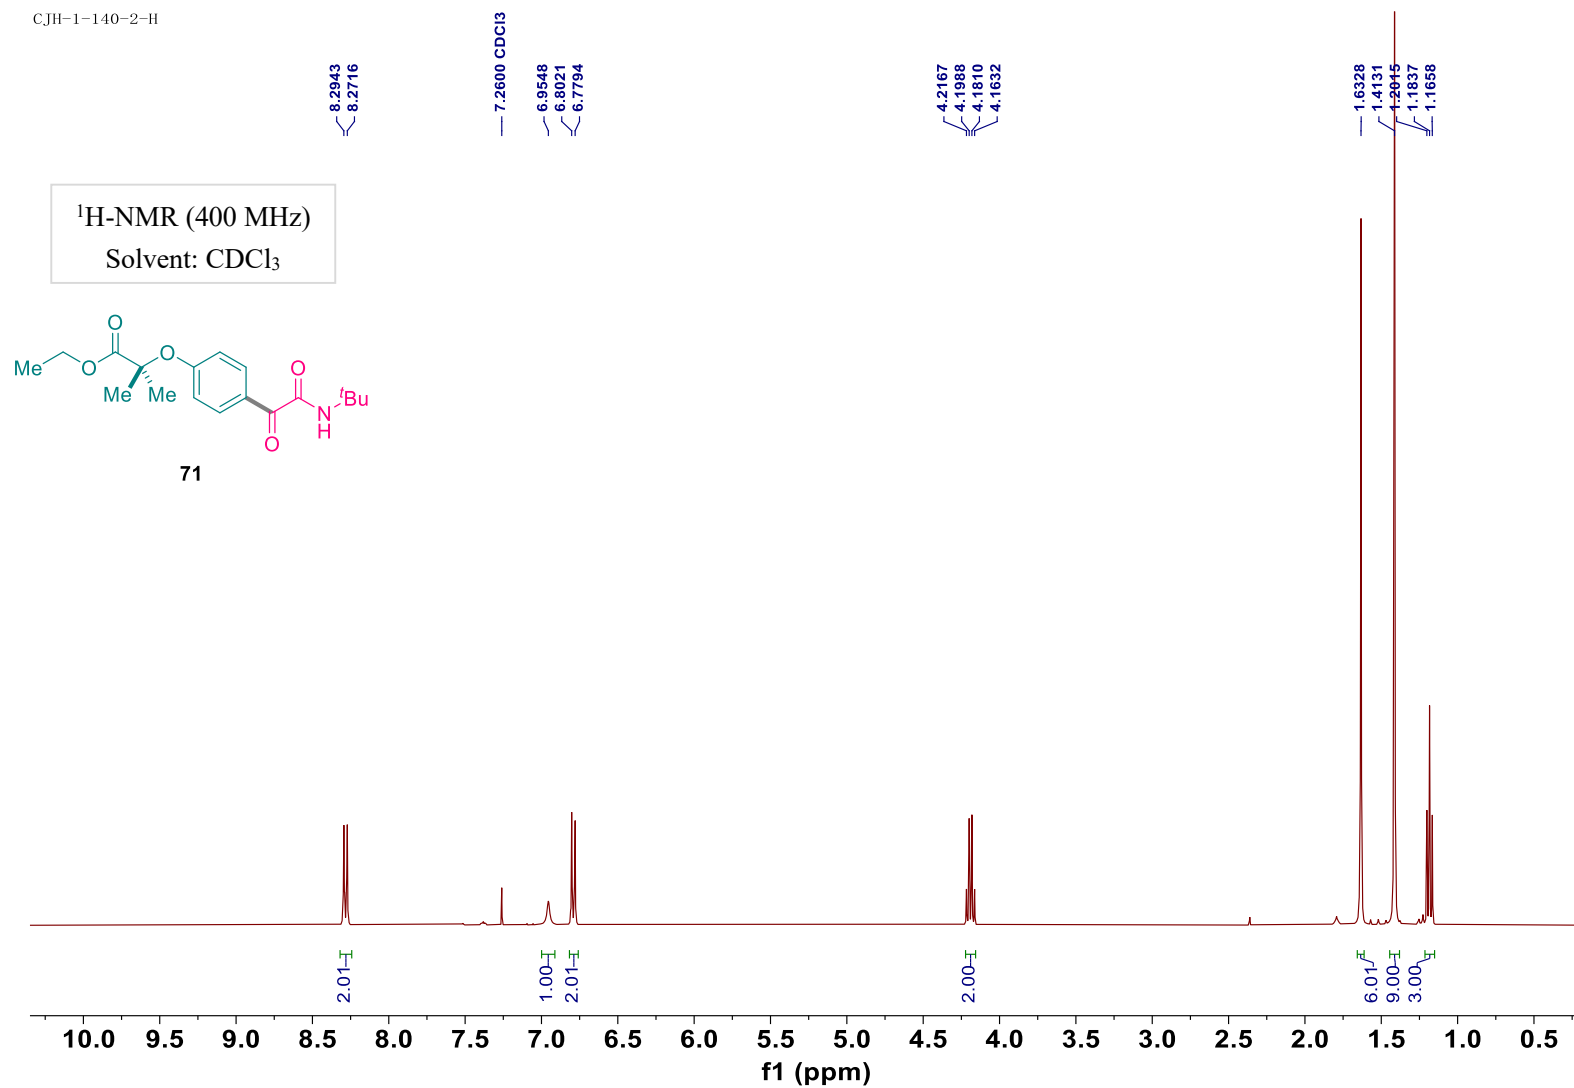

S217



CJH-1-140-2-C

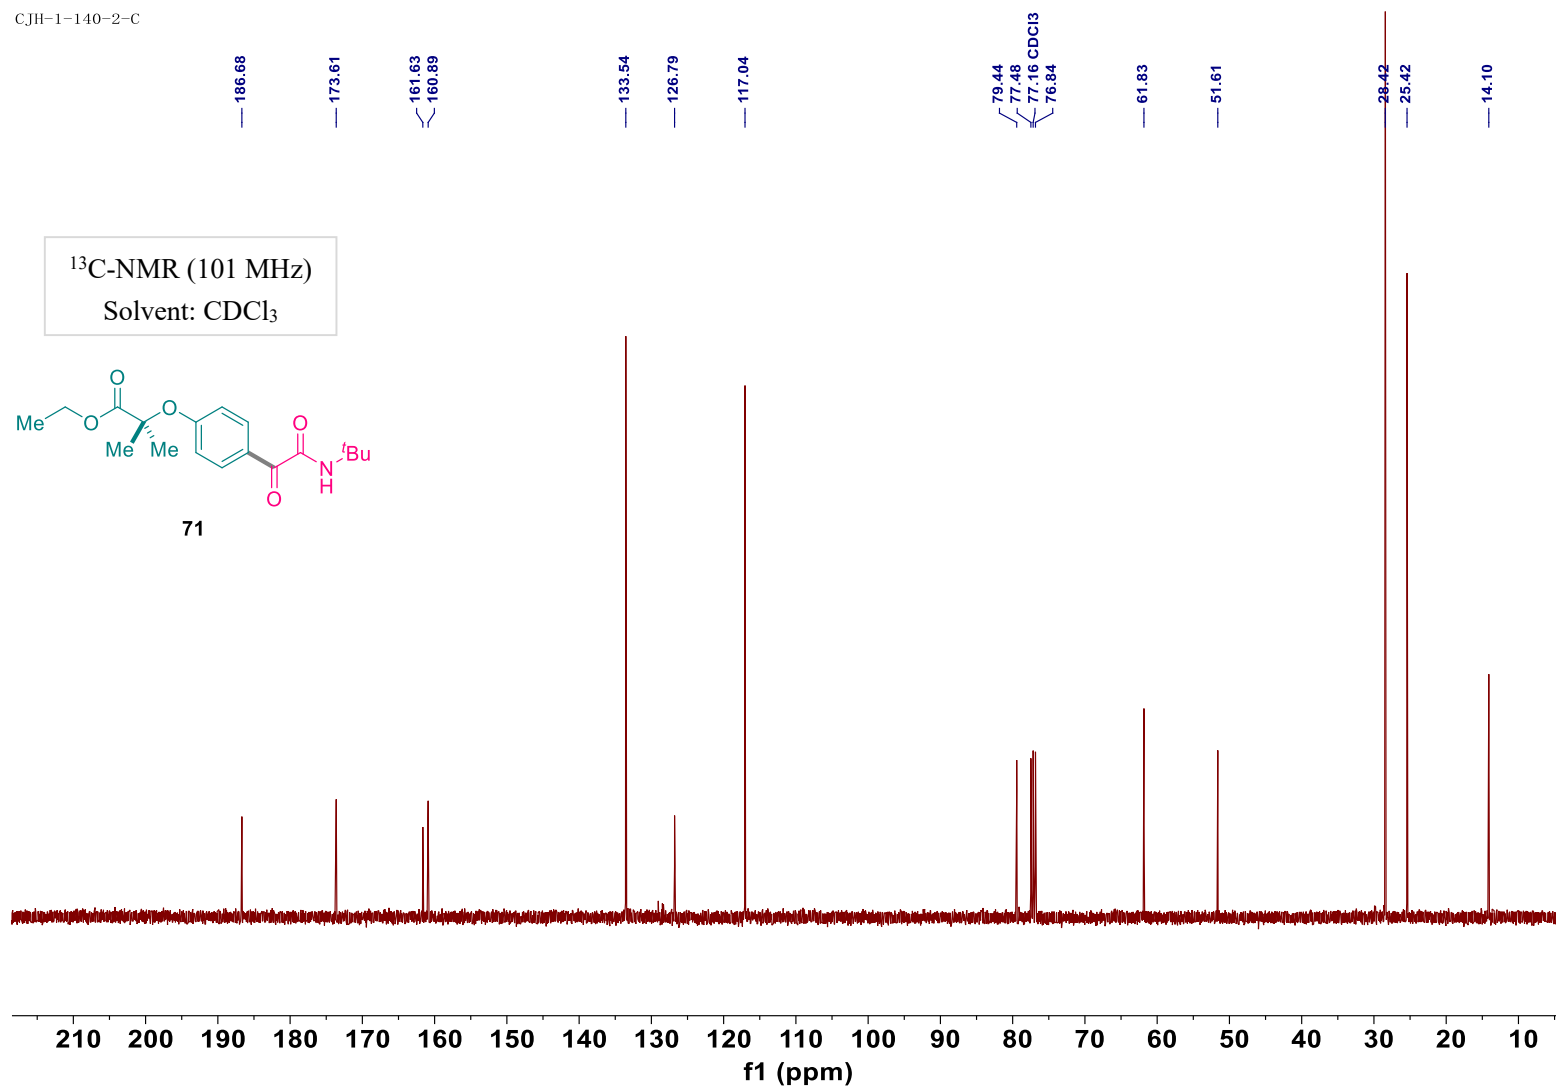

S218

CJH-1-129-1-H

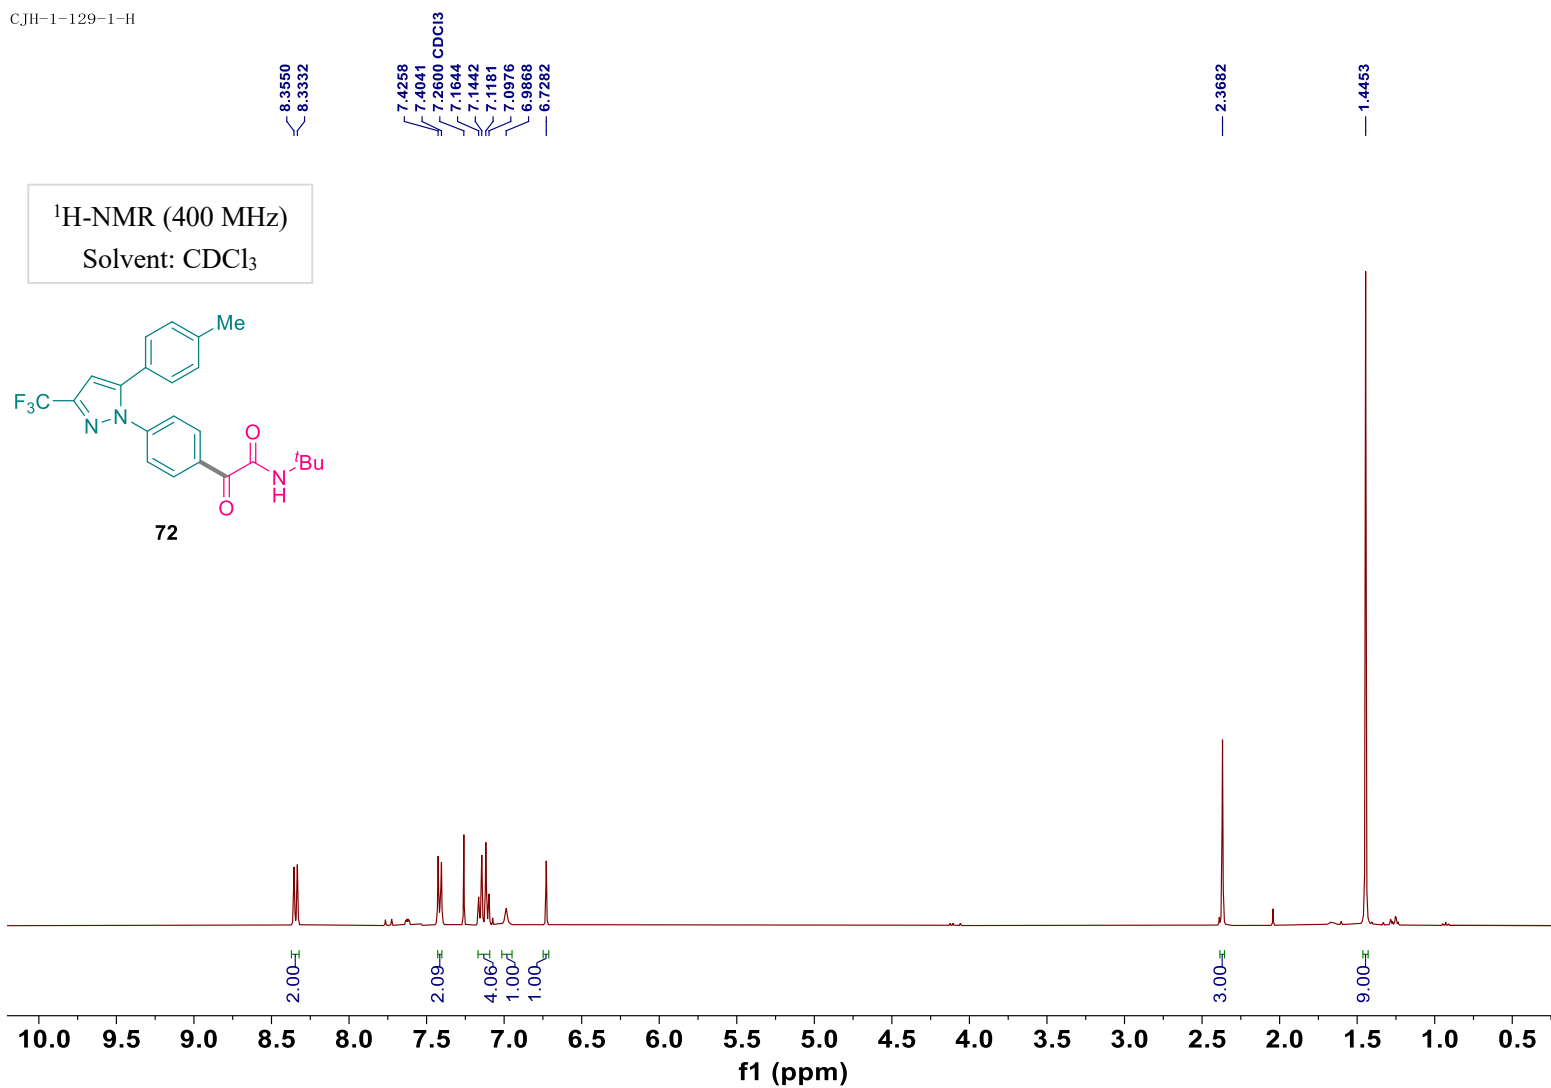

CJH-1-129-1-C

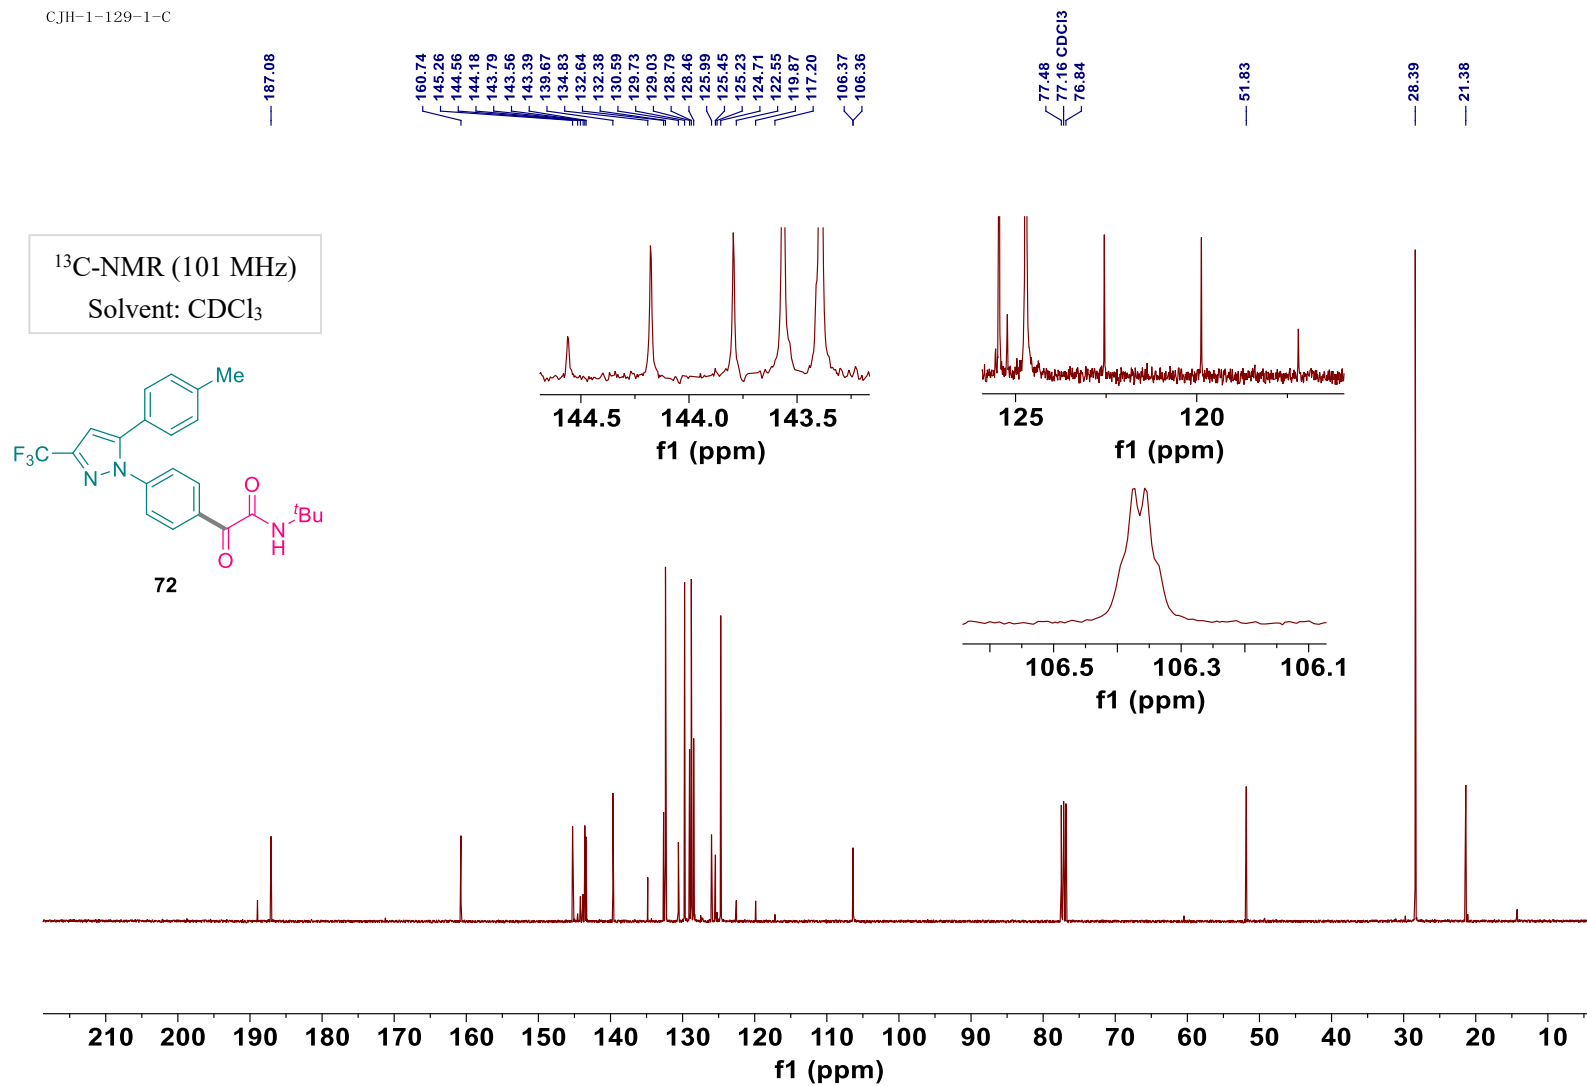

CJH-1-130-1-H

8.3750  
8.3659  
8.1394  
8.0688  
8.0488

7.4148  
7.3960  
7.3784  
7.2600 CDCl<sub>3</sub>  
7.0844  
7.0724  
7.0652  
7.0532  
6.9469

<sup>1</sup>H-NMR (400 MHz)  
Solvent: CDCl<sub>3</sub>

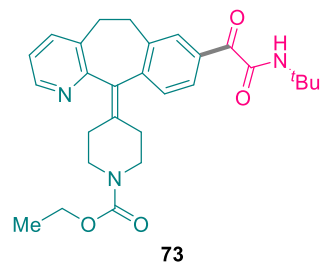

4.1237  
4.1061  
4.0883  
4.0706  
3.7876  
3.4754  
3.4672  
3.4506  
3.4389  
3.4274  
3.4139  
3.3997  
3.3730  
3.3532  
3.3415  
3.3309  
3.3192  
3.3103  
3.3021  
3.1526  
3.1436  
3.1293  
3.1198  
3.1085  
3.0970  
3.0874  
3.0749  
3.0646  
2.9212  
2.9093  
2.8922  
2.8821  
2.8723  
2.8644  
2.8518  
2.8391  
2.8257  
2.8141  
2.5078  
2.4972  
2.4734  
2.4624  
2.4501  
2.4392  
2.3324  
2.3013  
2.2904  
2.2547  
1.4039  
1.2299  
1.2121  
1.1943

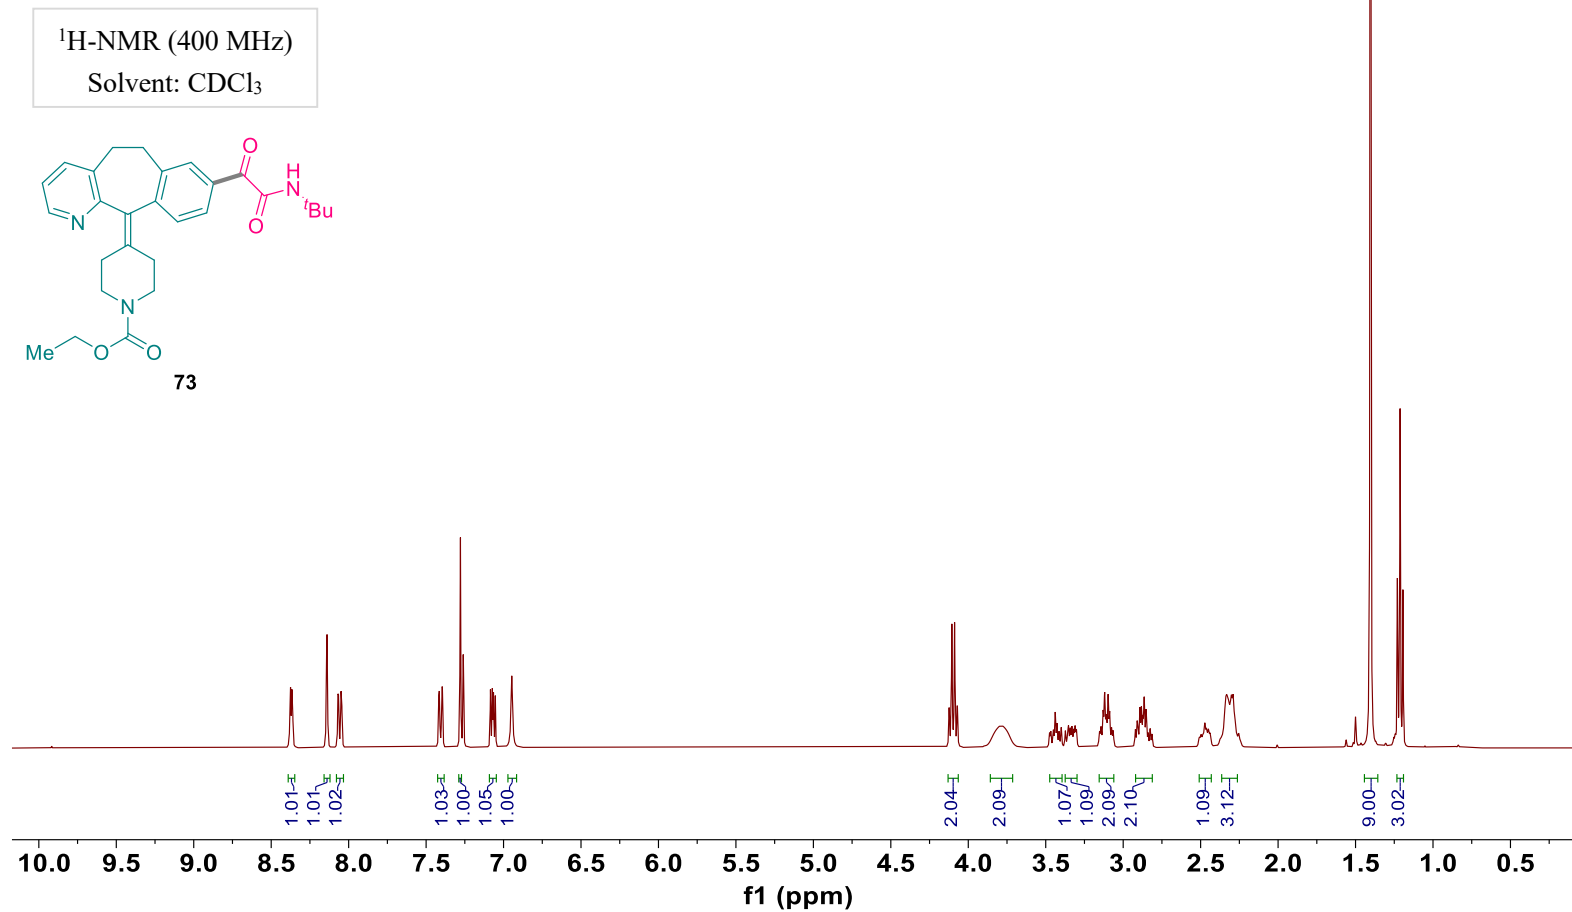

CJH-1-130-1-C

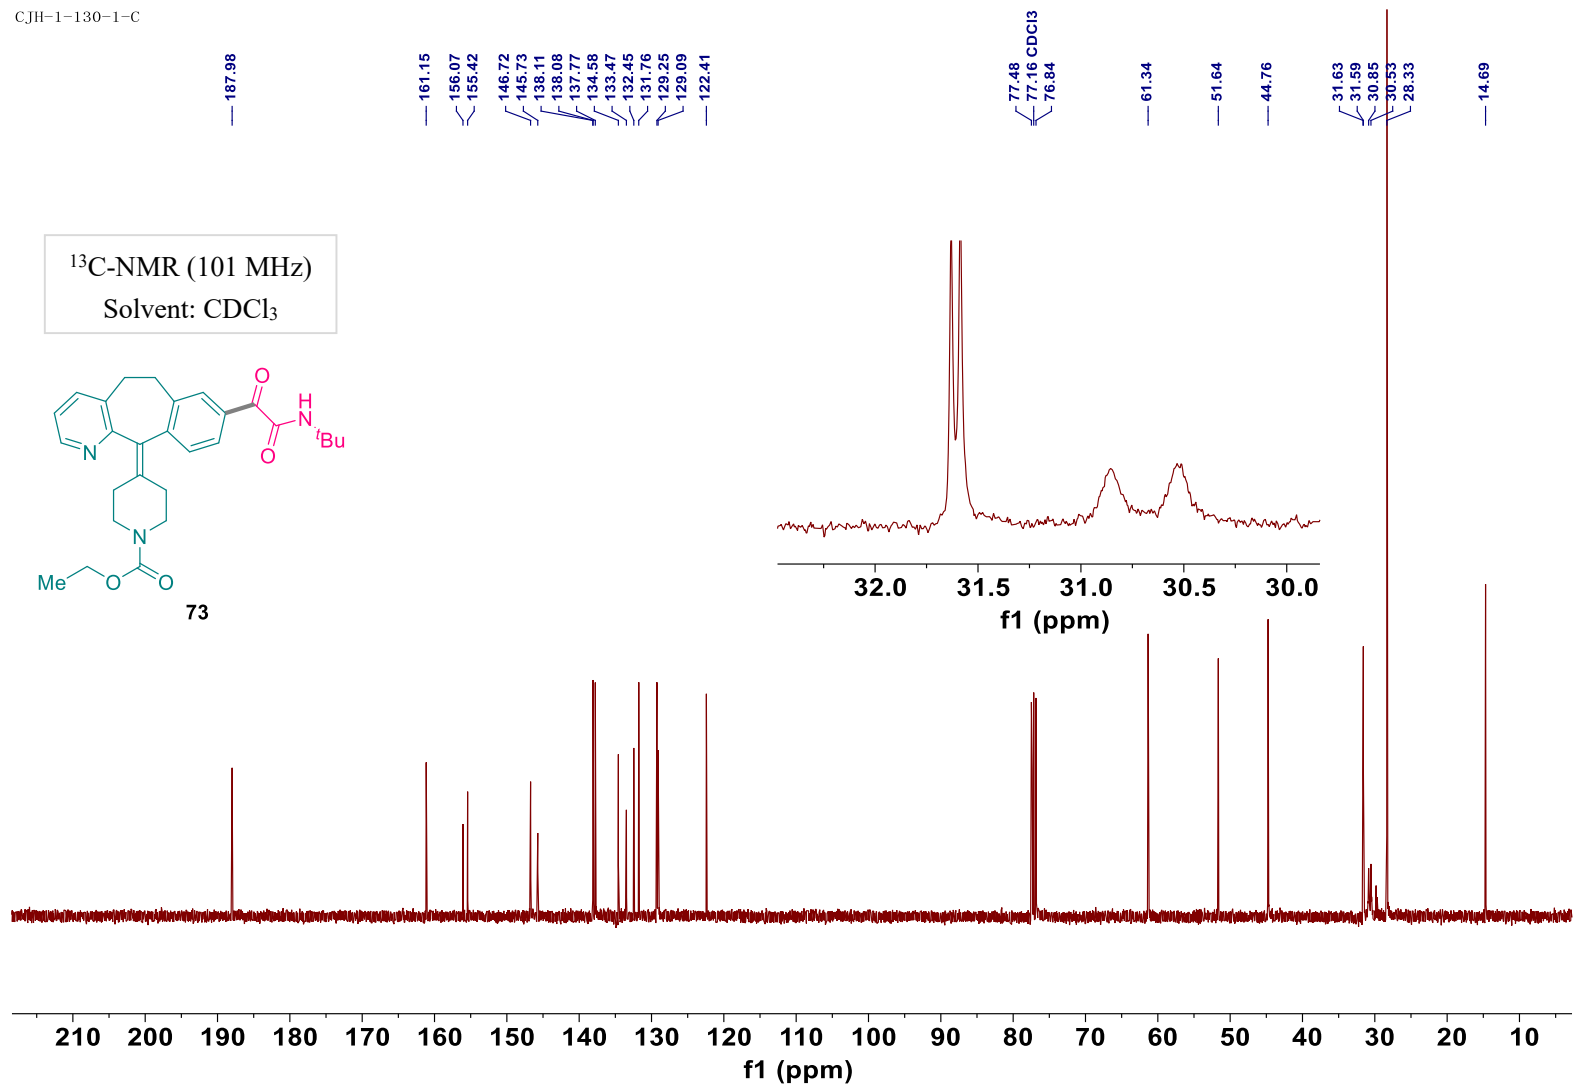

CJH-1-149-3-H

<sup>1</sup>H-NMR (400 MHz)  
Solvent: CDCl<sub>3</sub>

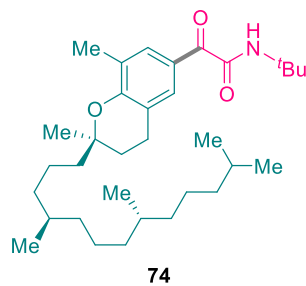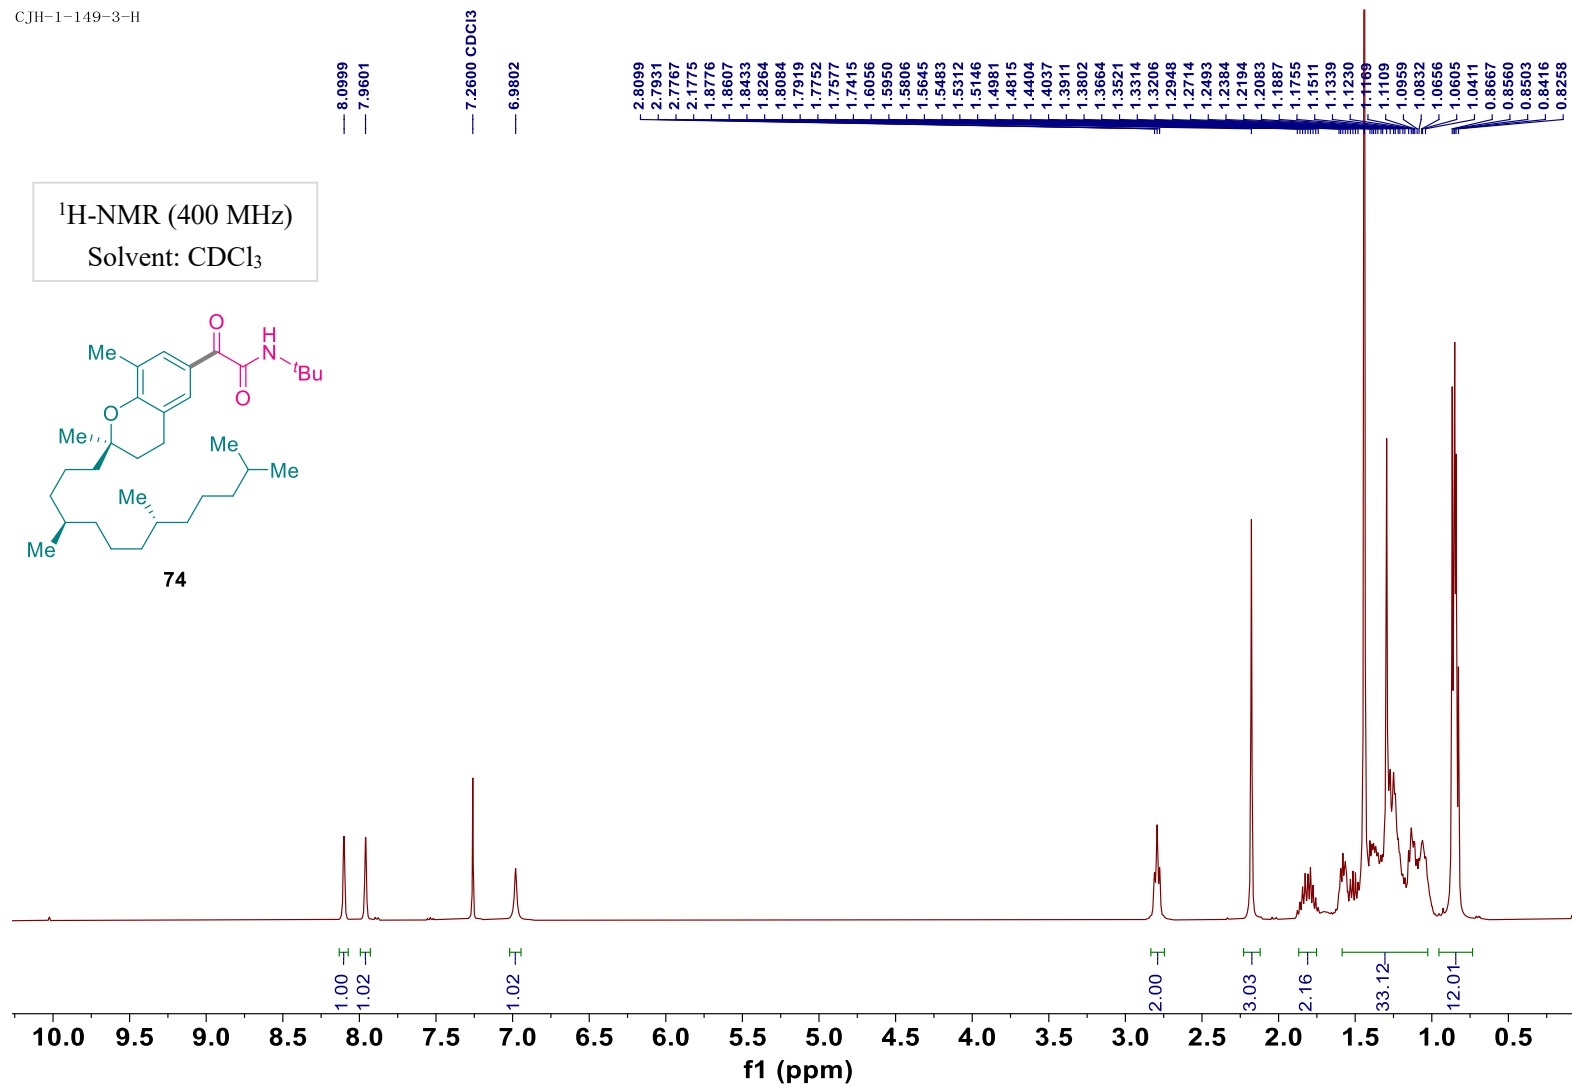

CJH-1-149-3-C

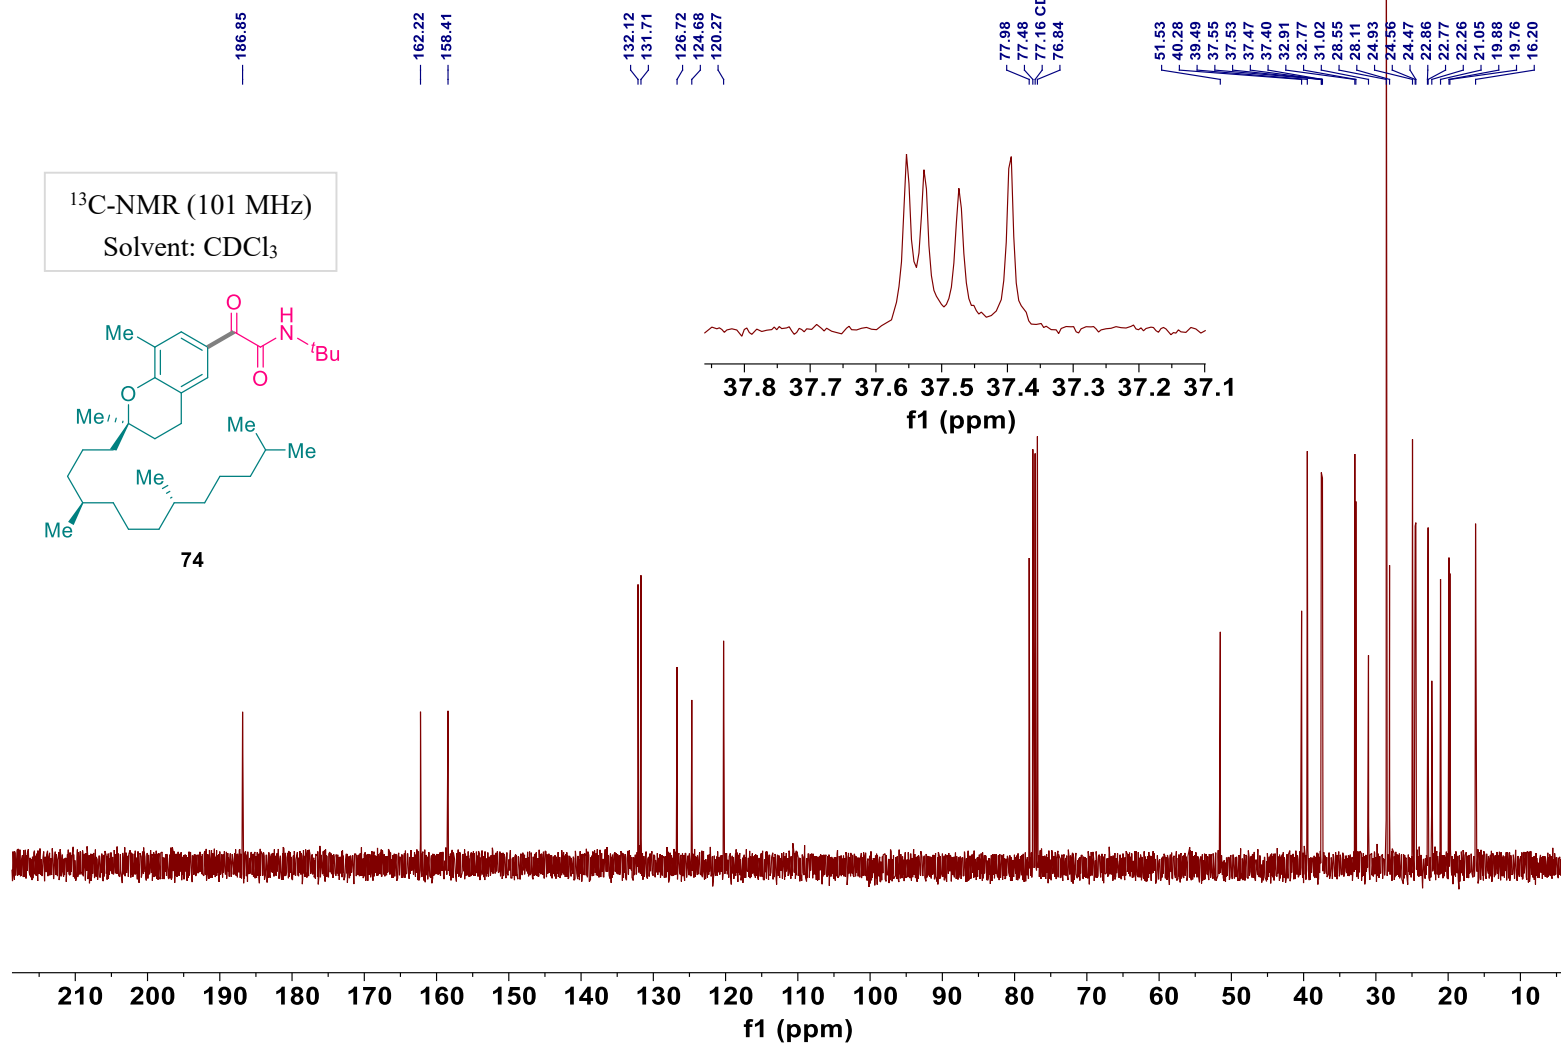

CJH-3-11-1-H

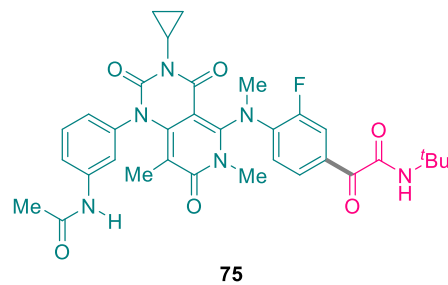

<sup>1</sup>H-NMR (400 MHz)  
Solvent: CDCl<sub>3</sub>

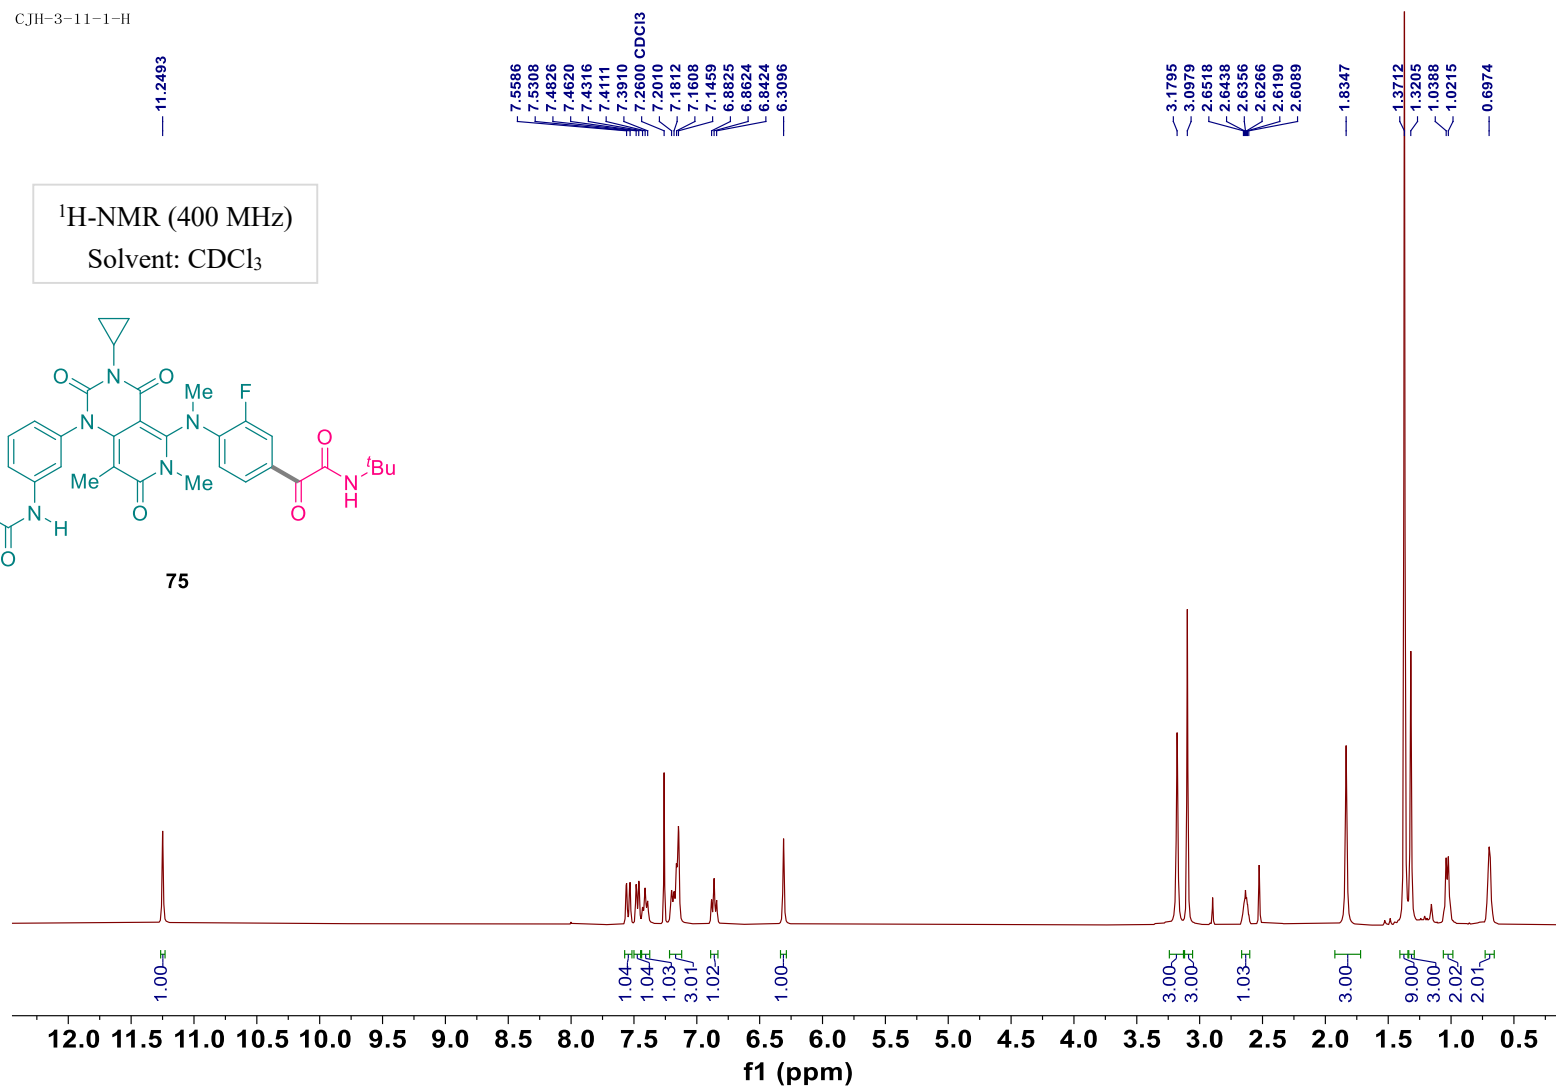



CJH-3-11-1-C

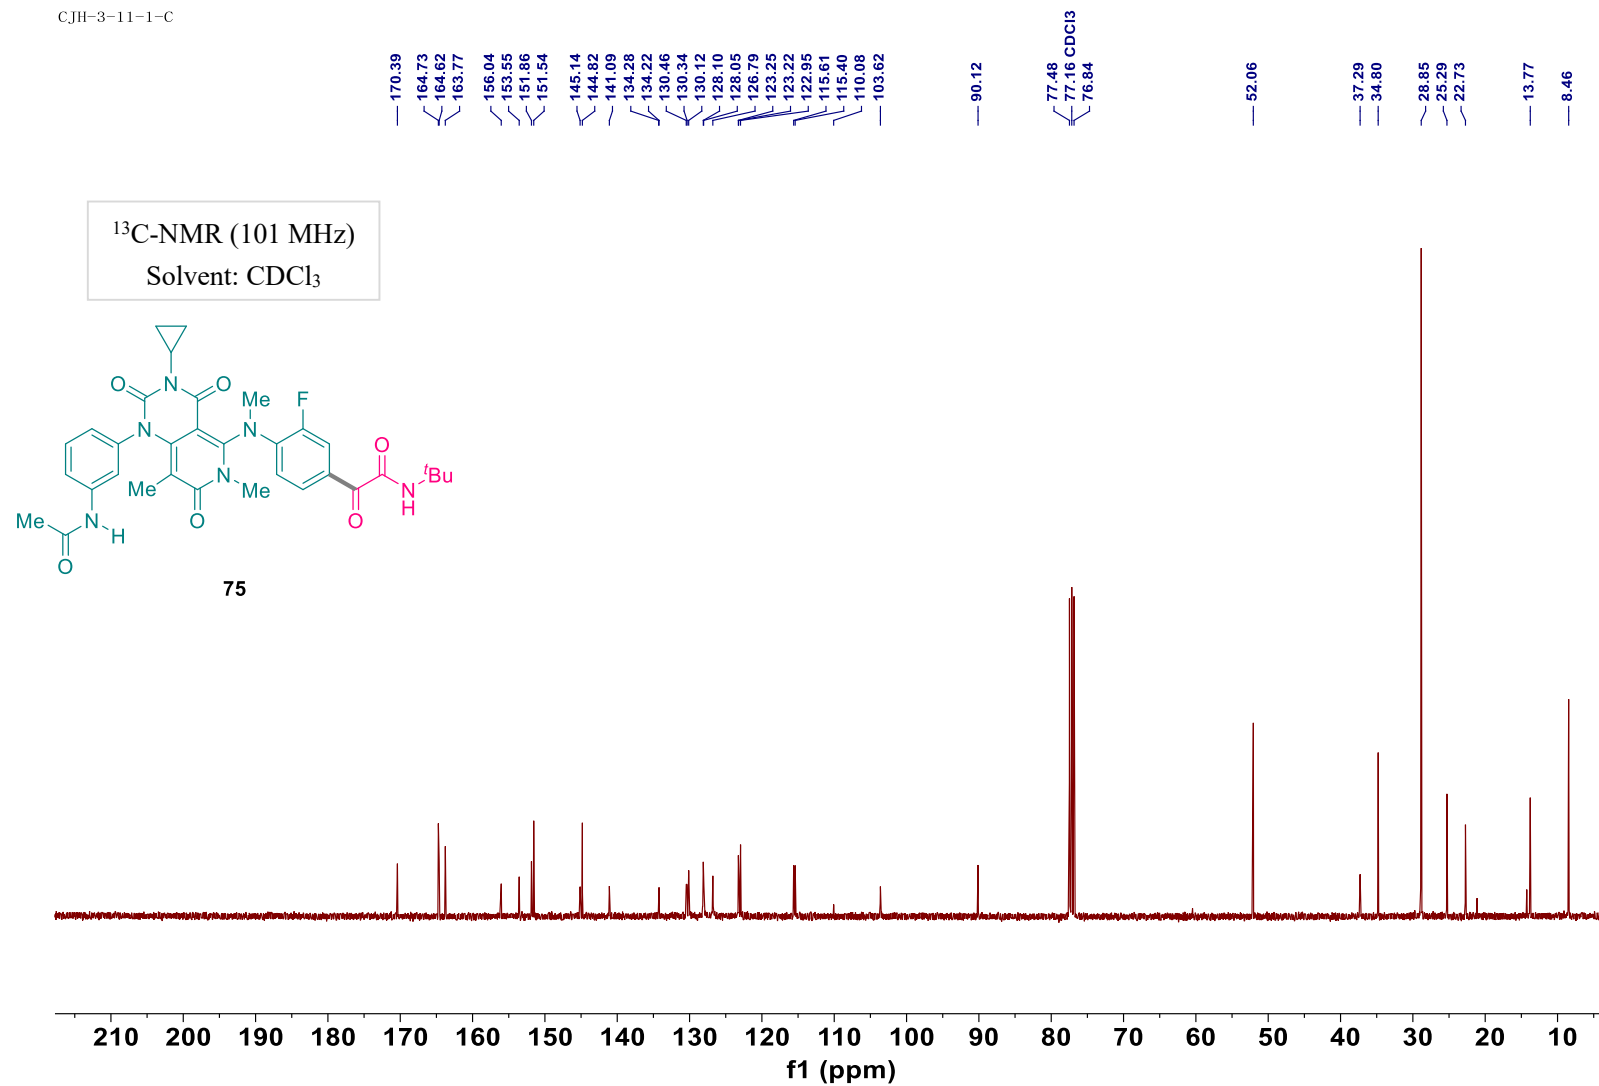

S226

CJH-3-58-2-H

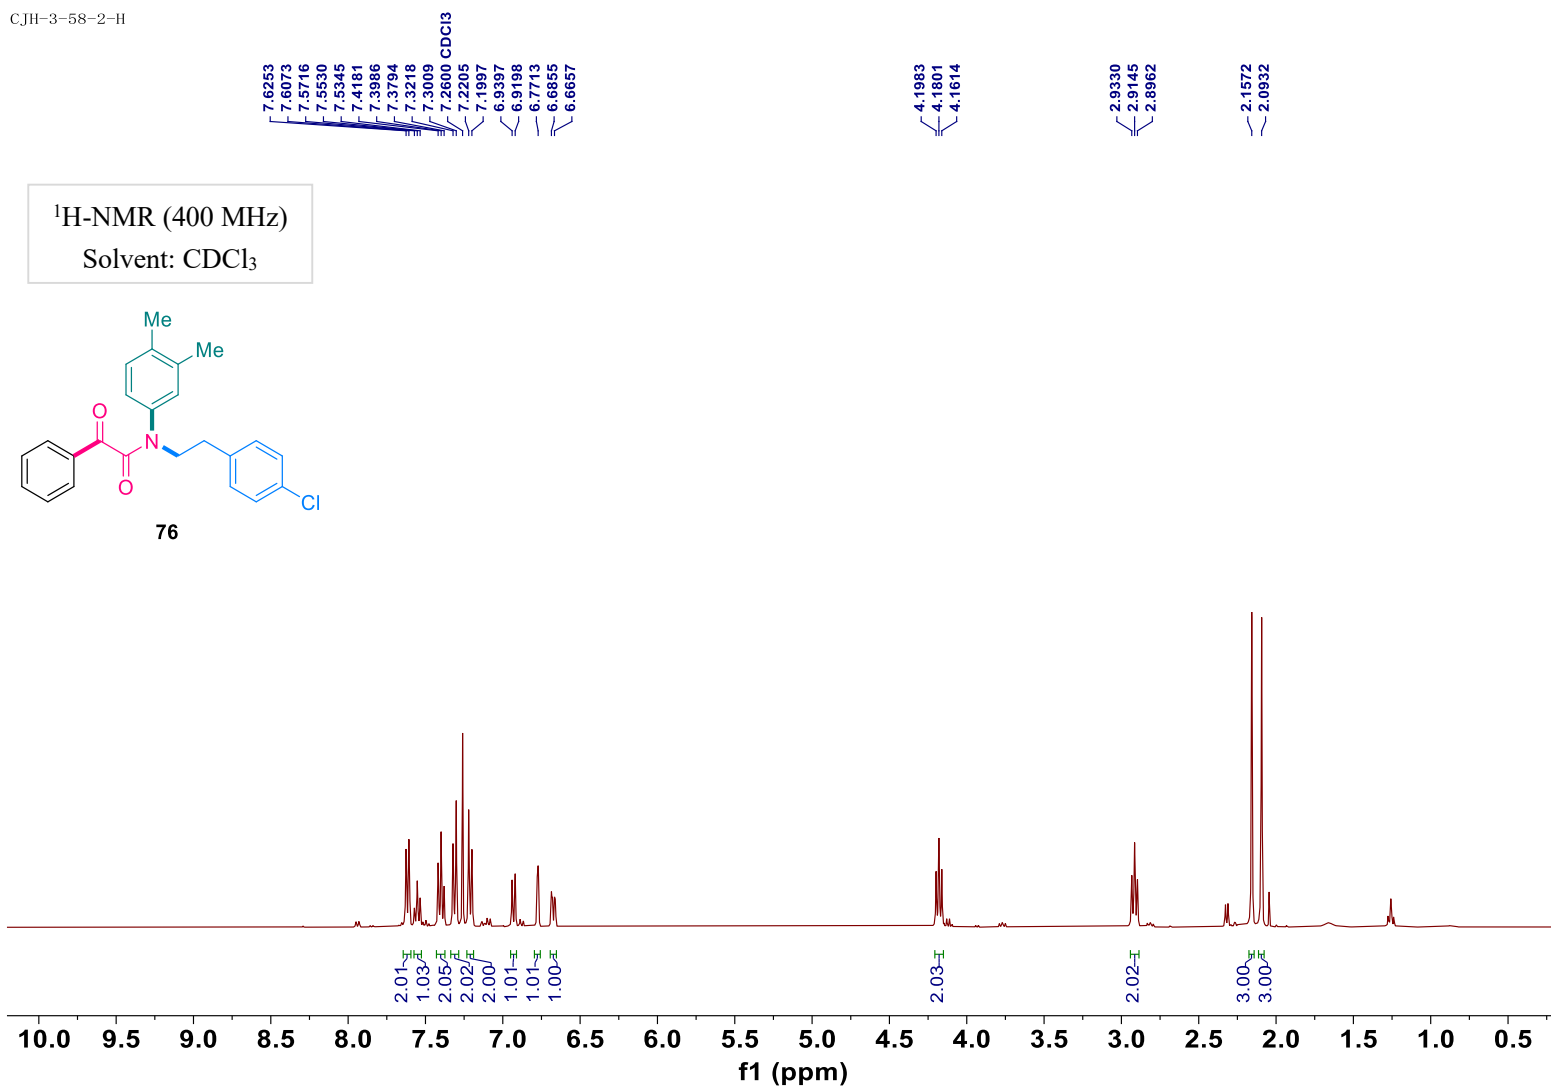

S227

CJH-3-58-2-C

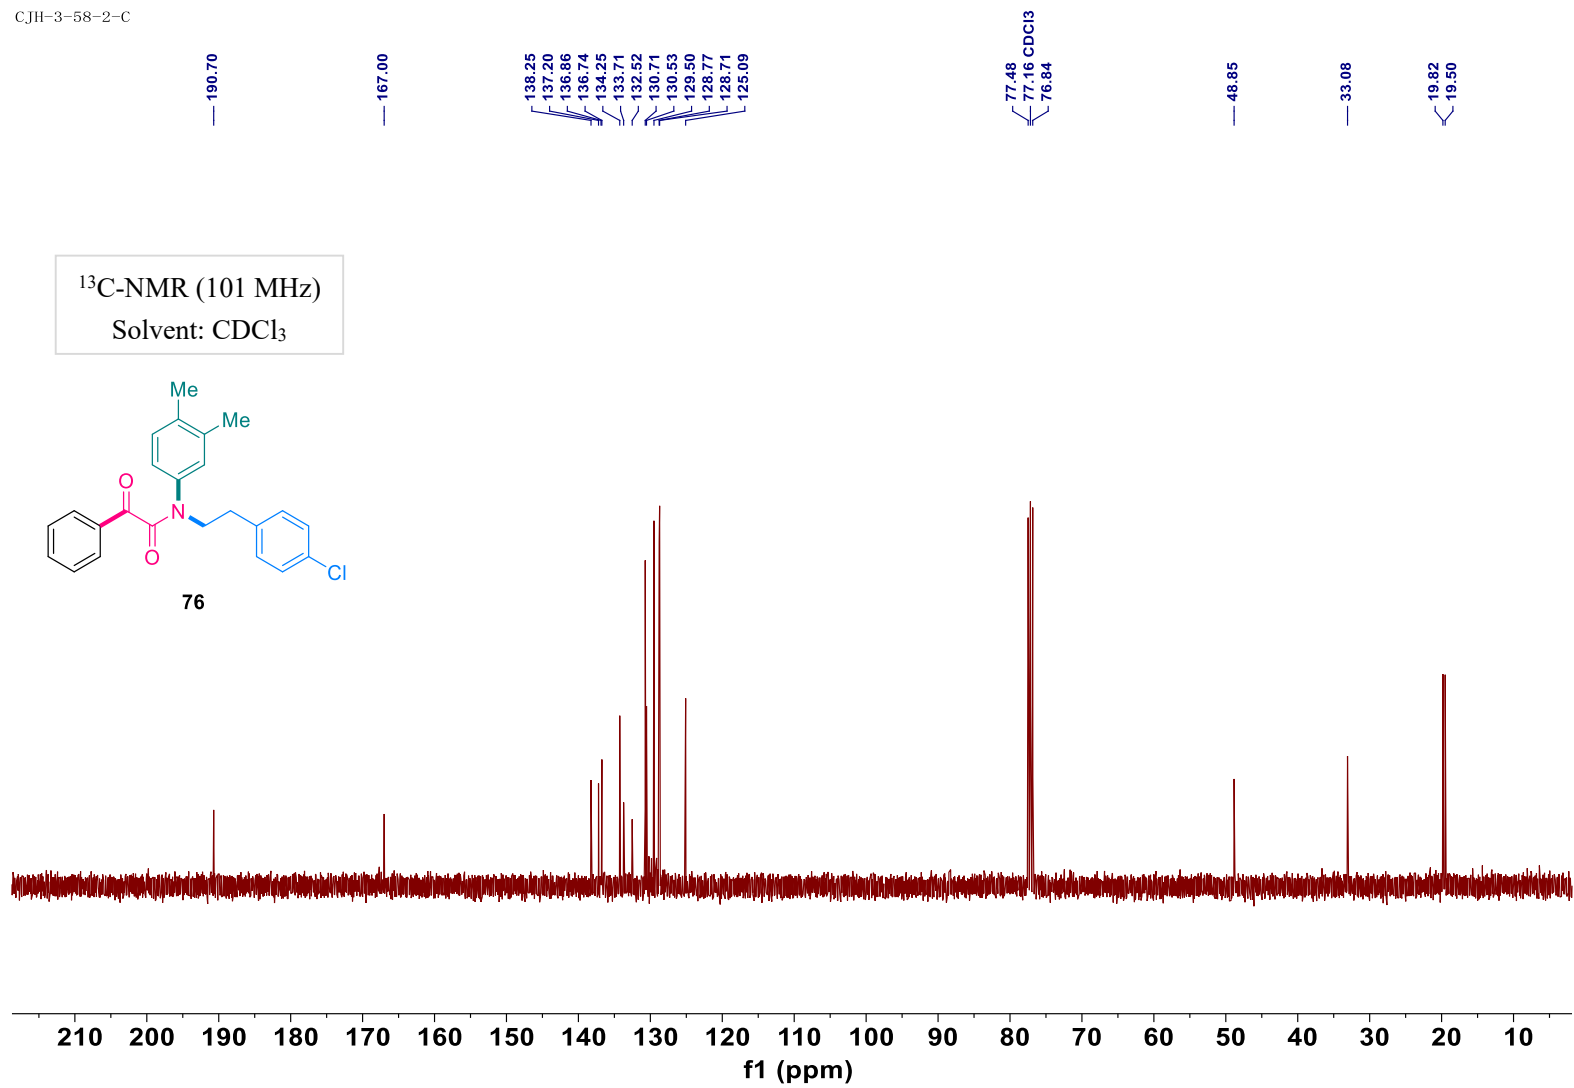

CJH-1-188-3-H

8.8886  
8.5344  
8.5140  
7.7776  
7.7569  
7.6331  
7.6110  
7.4531  
7.4350  
7.4192  
7.4010  
7.3822  
7.3597  
7.3412  
7.3240  
7.2600 CDCl<sub>3</sub>  
7.0222  
7.0001

5.0824

<sup>1</sup>H-NMR (400 MHz)

Solvent: CDCl<sub>3</sub>

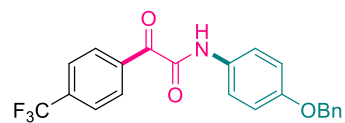

77

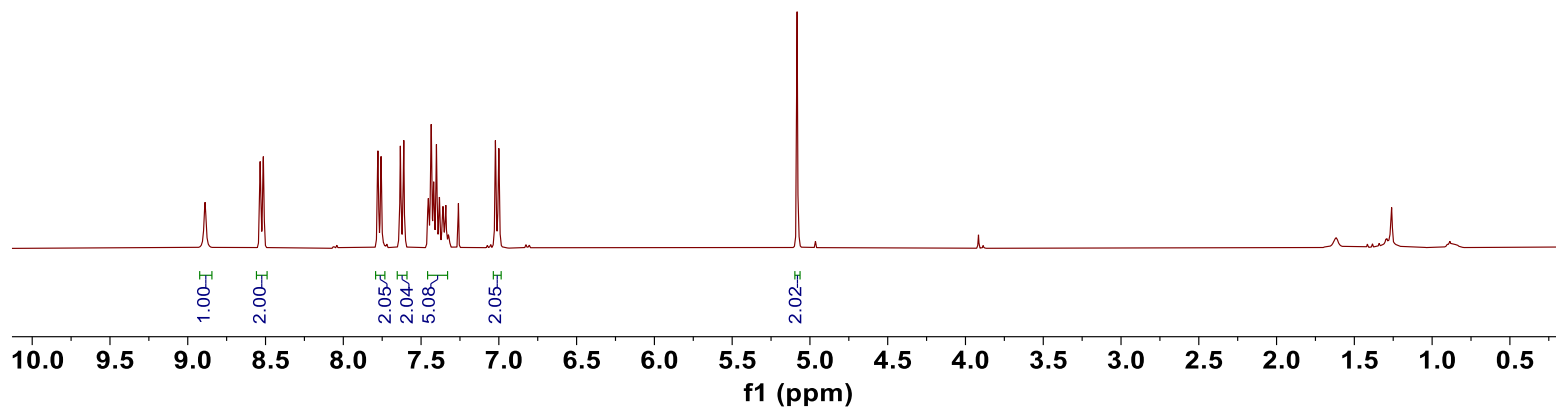

S229

CJH-1-188-3-C

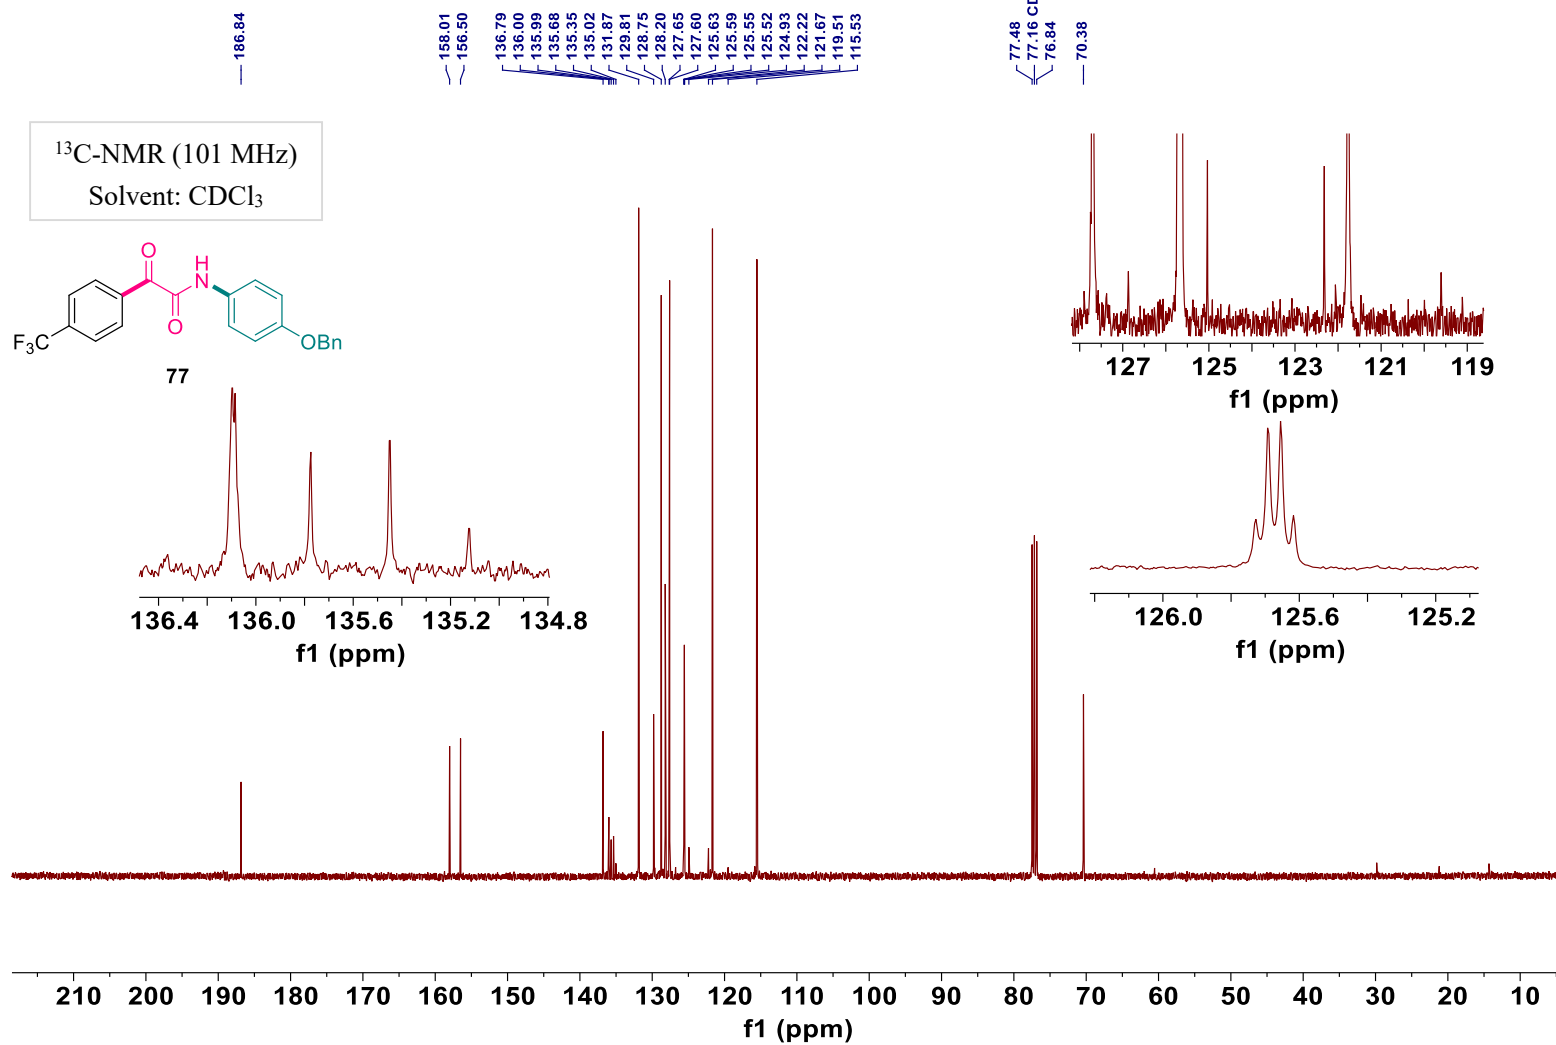

S230

CJH-2-52-1-H

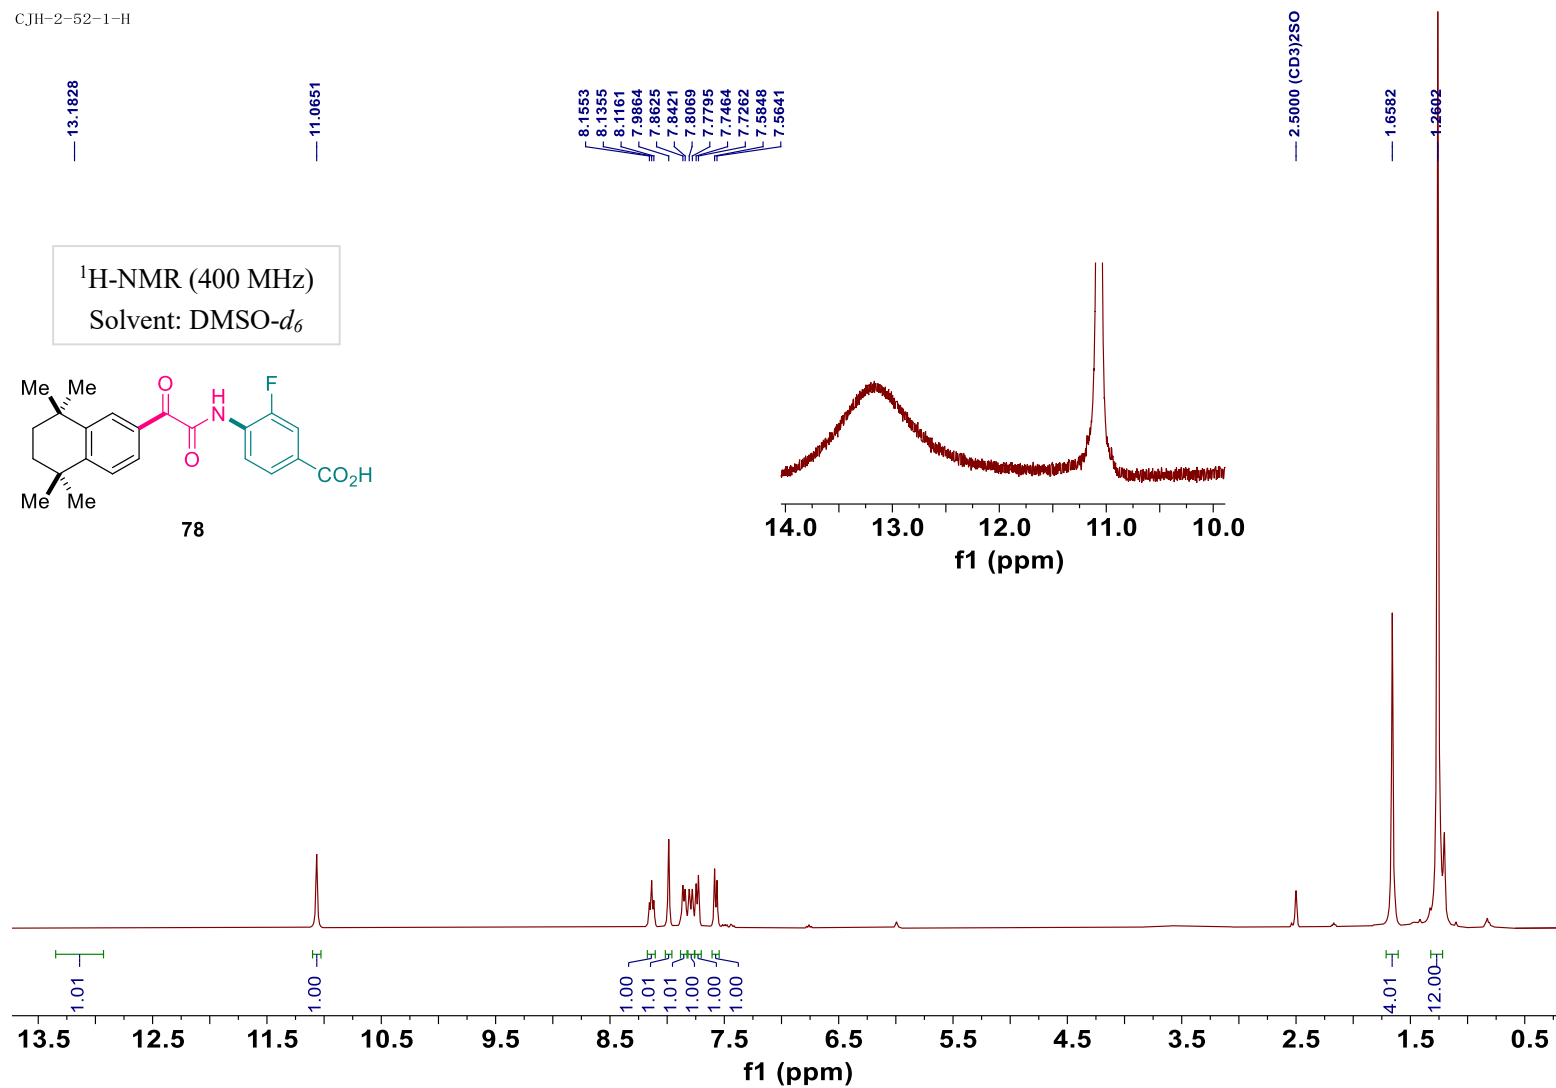

S231

CJH-2-52-2-C

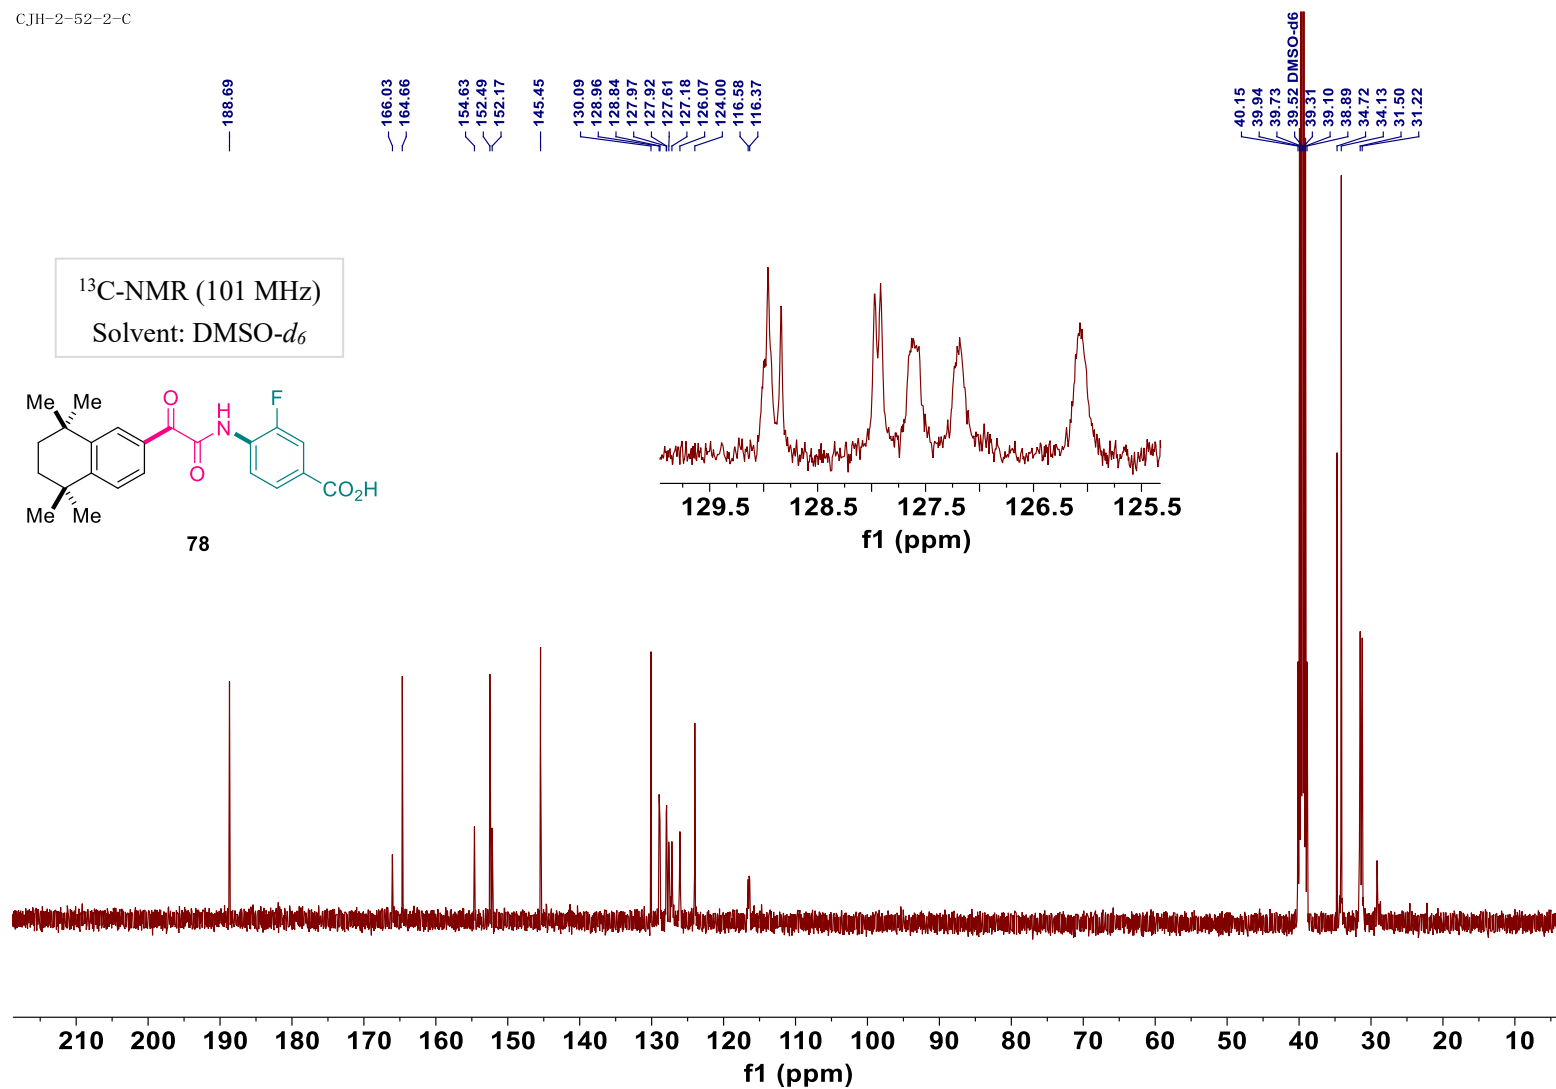

CJH-3-57-1-H

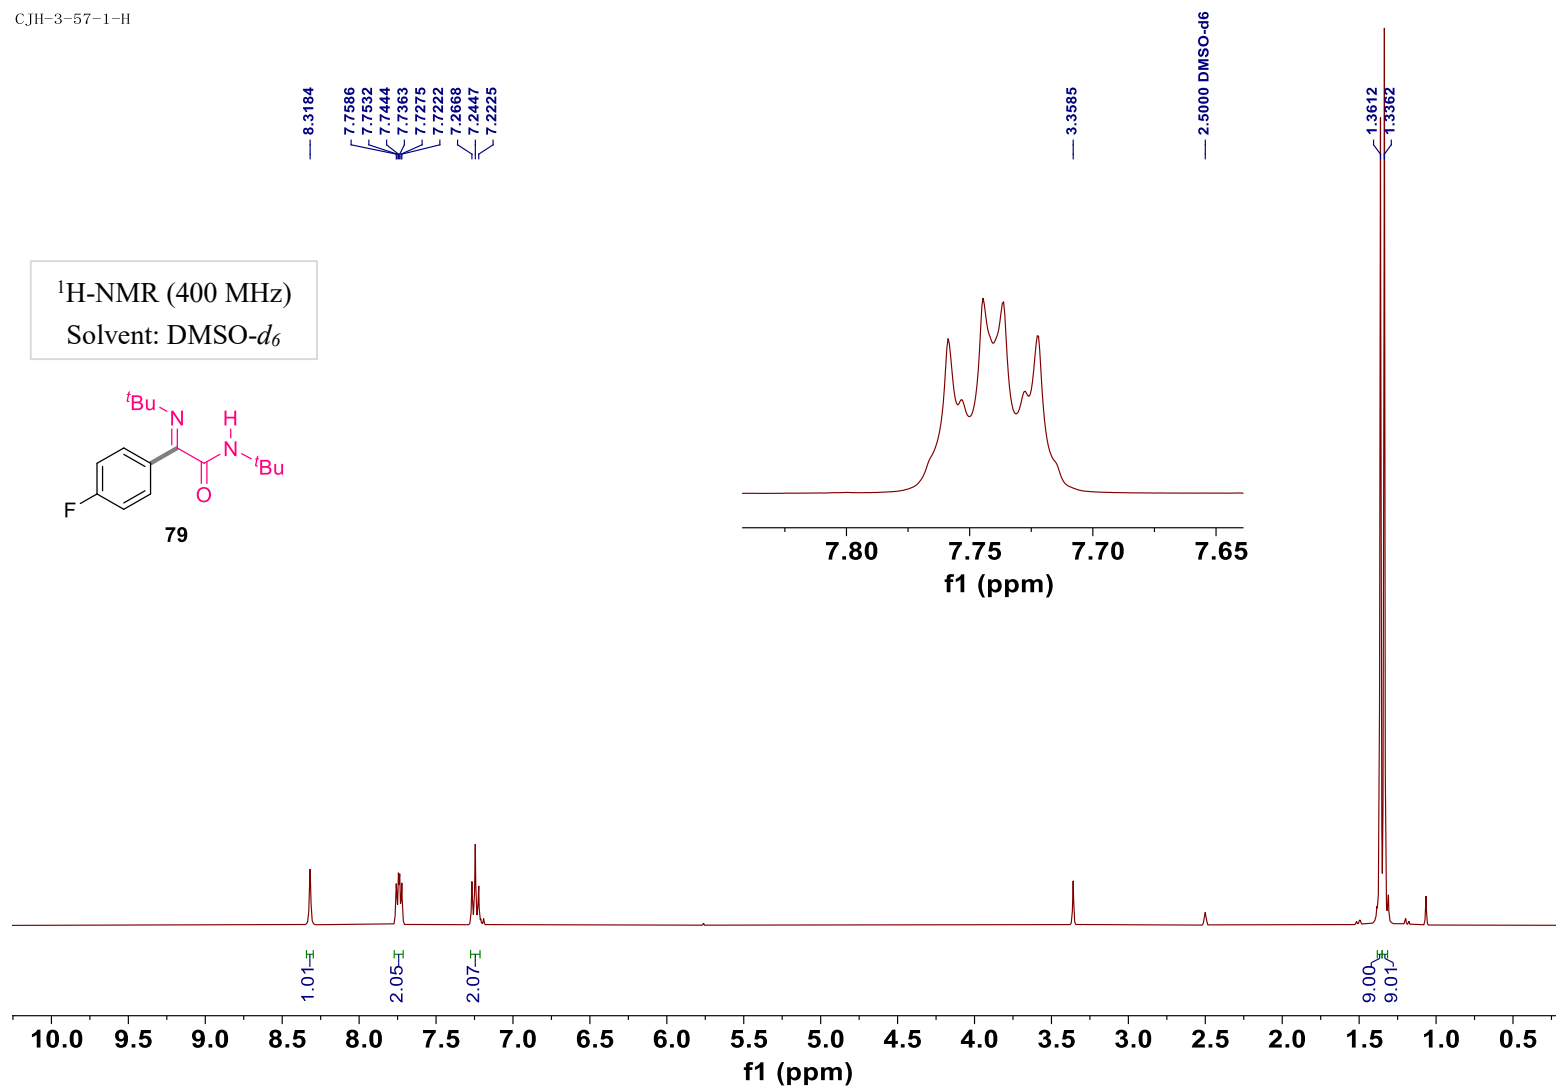

S233



CJH-3-57-1-C

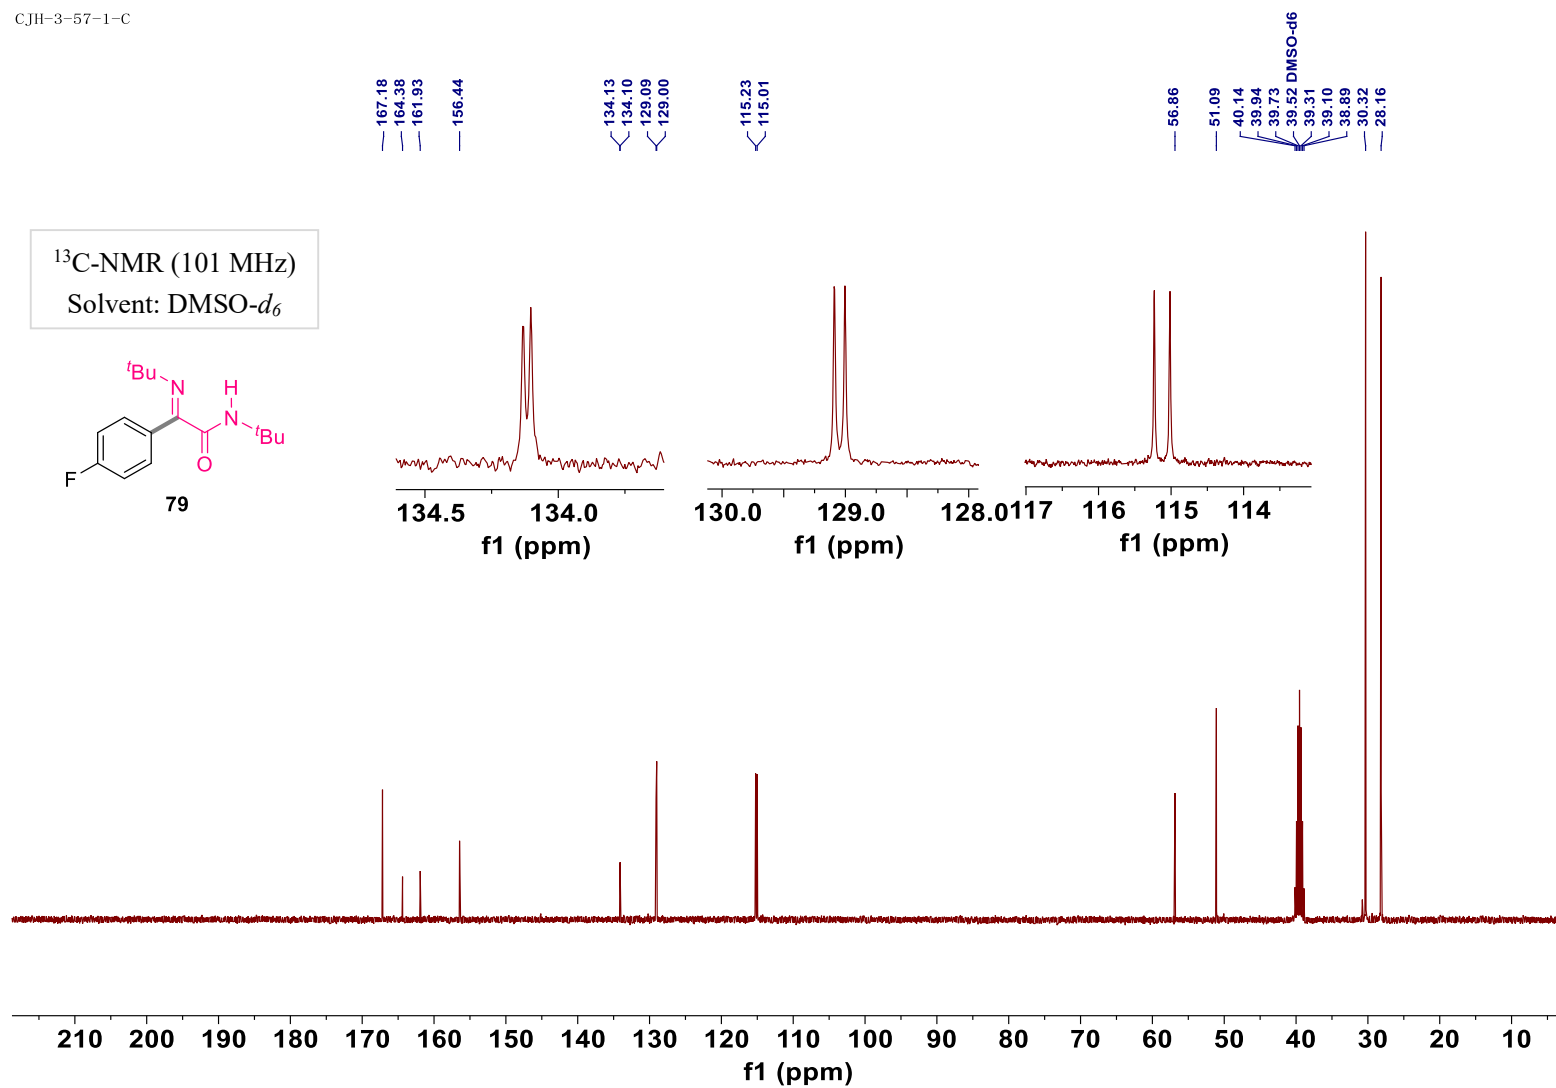

S234

CJH-3-57-1-F

$^{19}\text{F}$ -NMR (376 MHz)  
Solvent:  $\text{DMSO}-d_6$

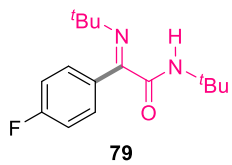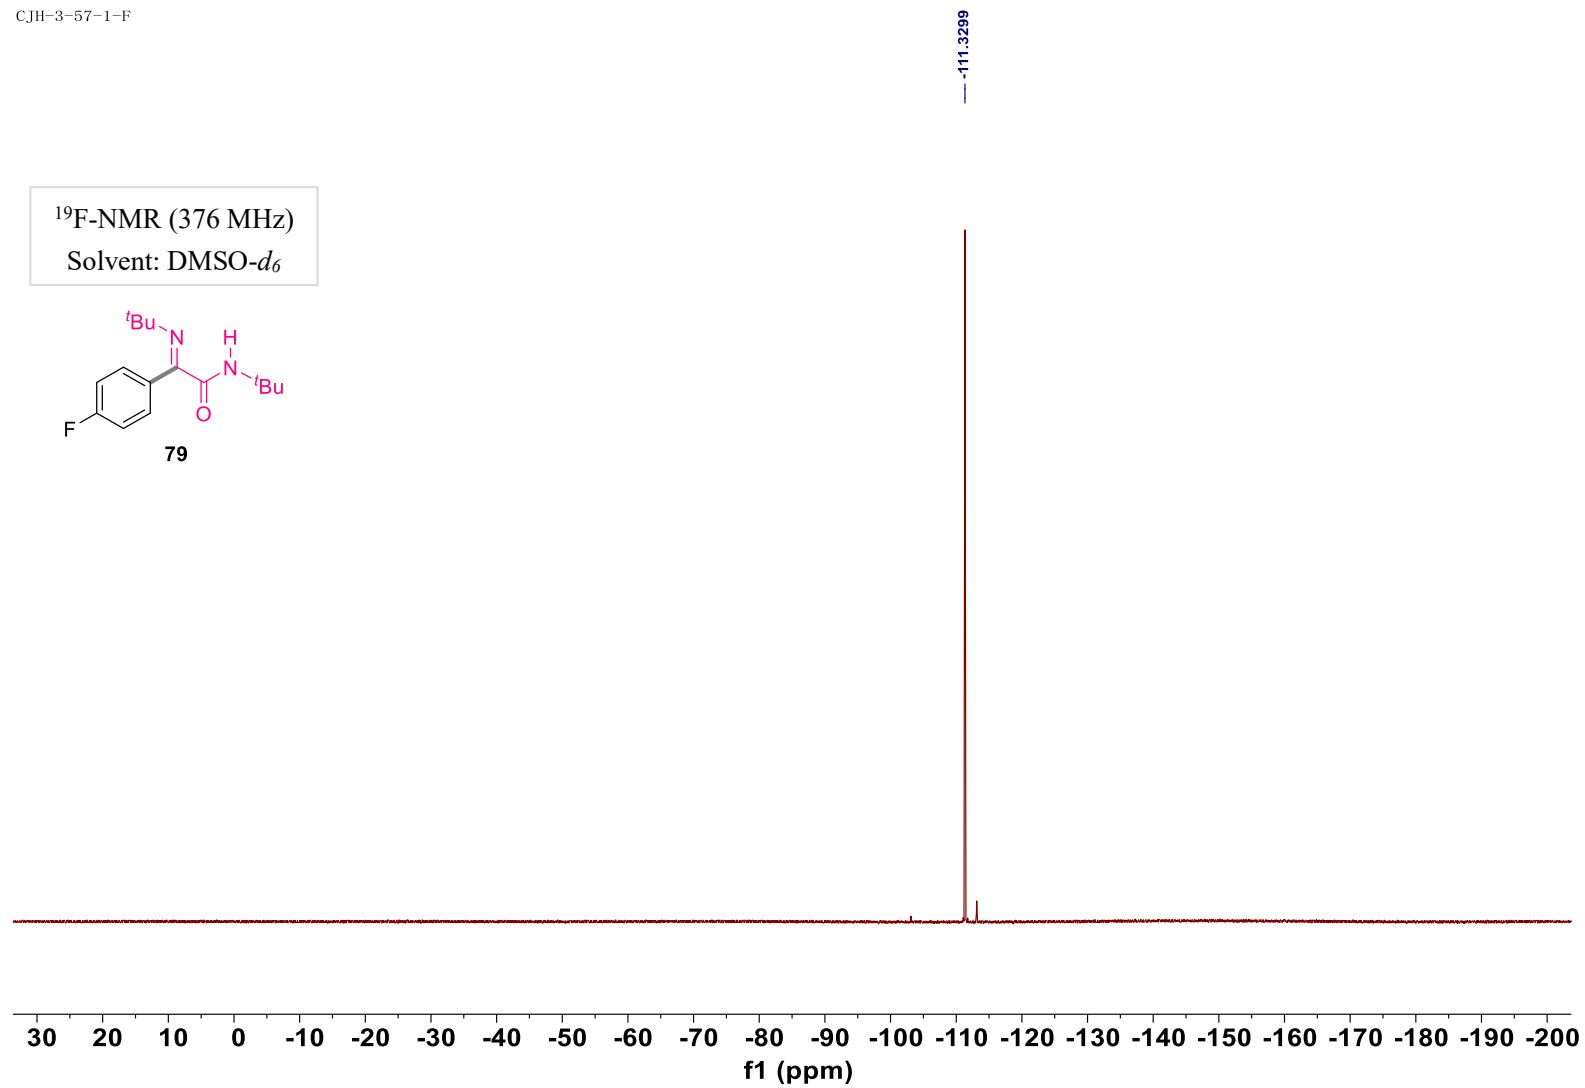

S235

CJH-3-130-1-H

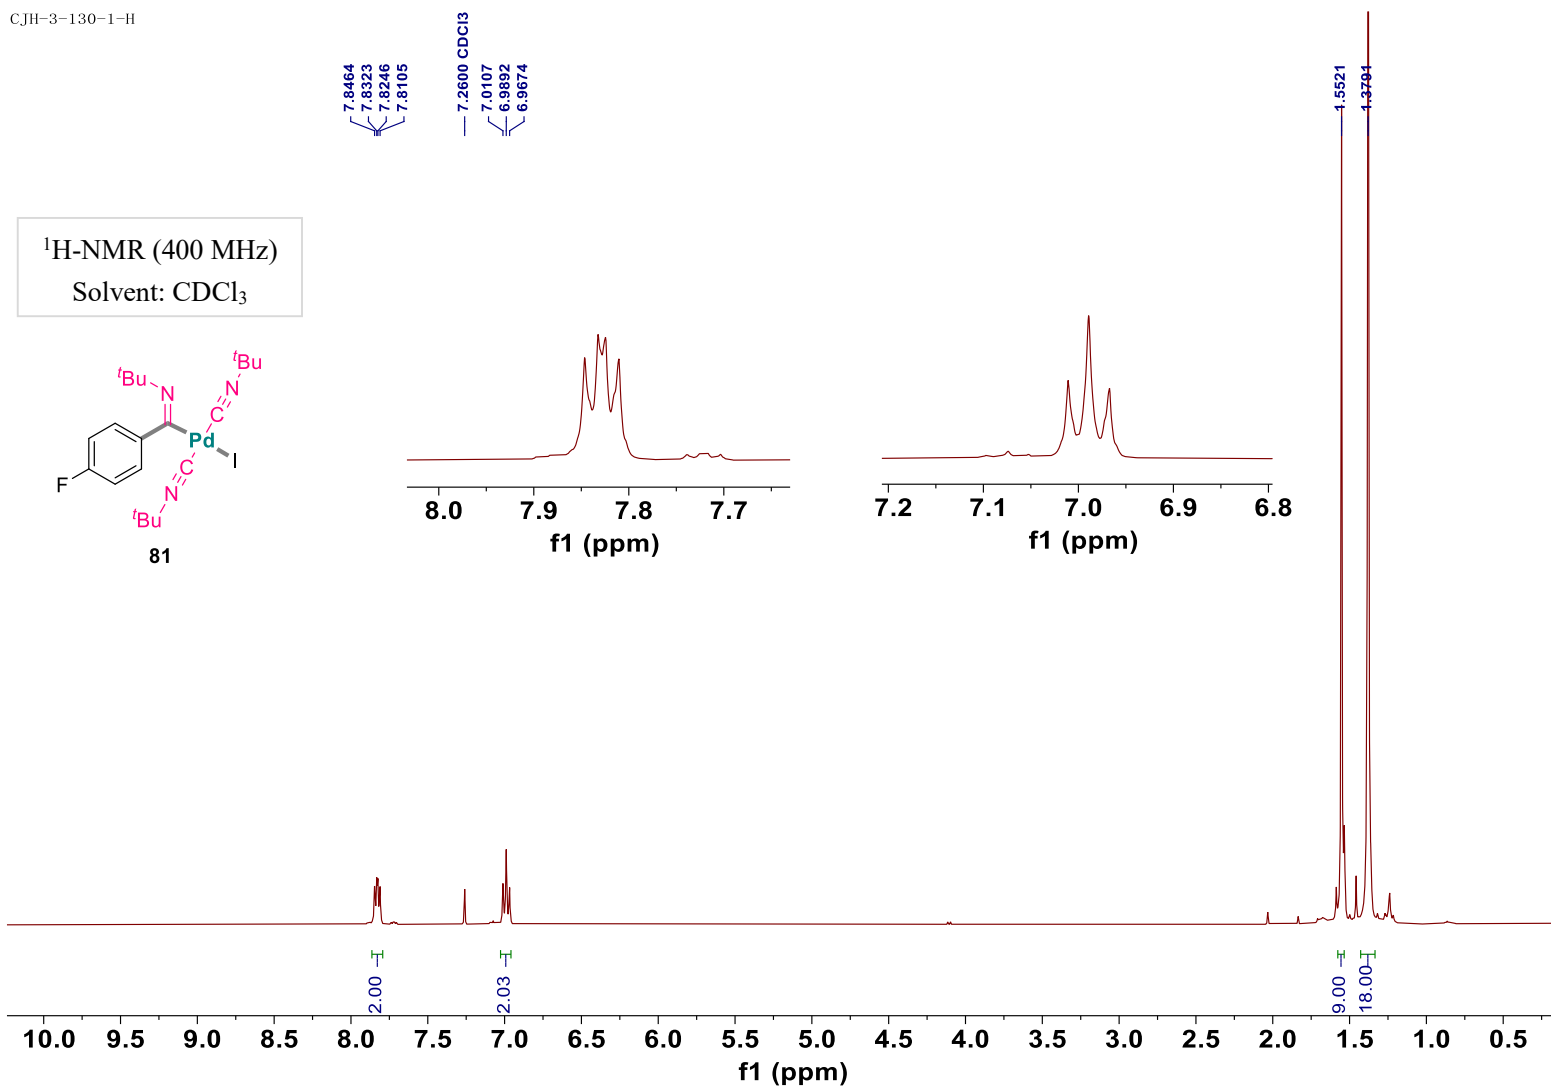

CJH-3-130-1-C

<sup>13</sup>C-NMR (101 MHz)

Solvent: CDCl<sub>3</sub>

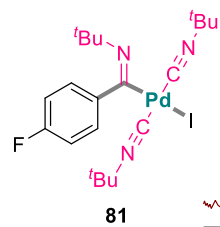

81

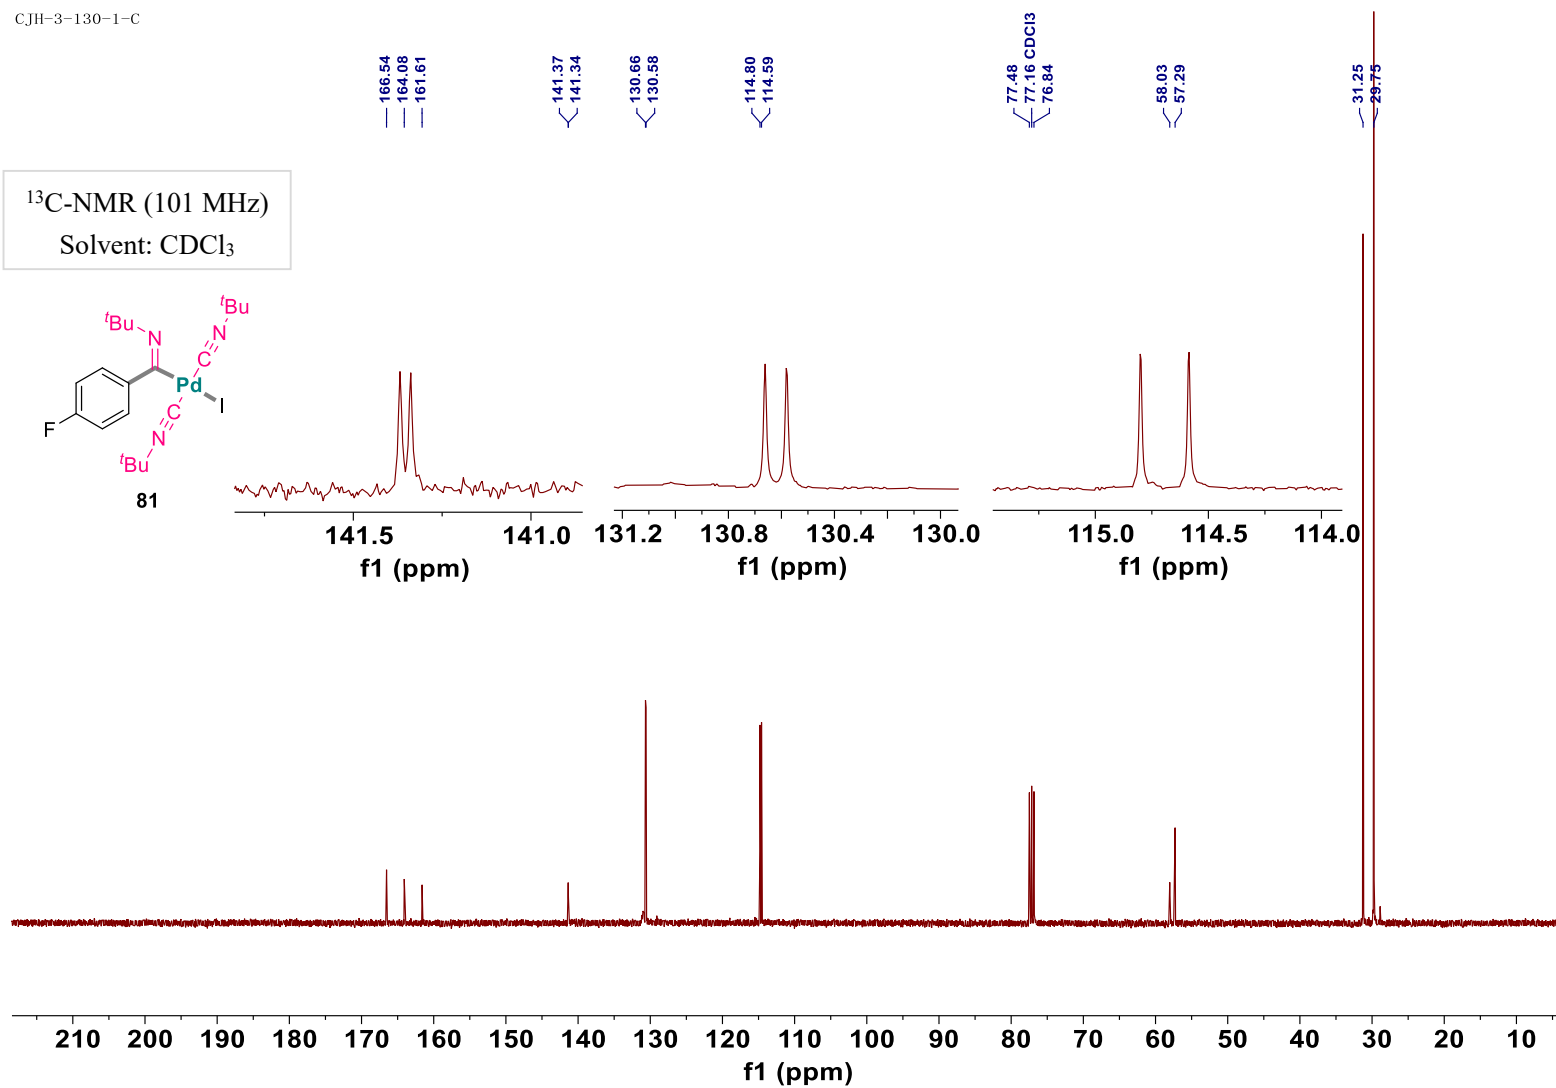

CJH-3-130-1-F

$^{19}\text{F}$ -NMR (376 MHz)  
Solvent:  $\text{CDCl}_3$

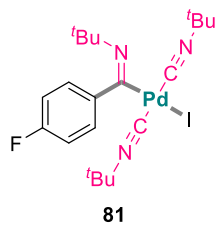

— -113.3310

30 20 10 0 -10 -20 -30 -40 -50 -60 -70 -80 -90 -100 -110 -120 -130 -140 -150 -160 -170 -180 -190 -200  
f1 (ppm)

S238

## 11. References

1. Bacauanu, V. et al. Metallaphotoredox difluoromethylation of aryl bromides. *Angew. Chem. Int. Ed.* **57**, 12543–12548 (2018).
2. Shao, X. & Malcolmson, S. J. Catalytic enantio- and diastereoselective cyclopropanation of 2-azadienes for the synthesis of aminocyclopropanes bearing quaternary carbon stereogenic centers. *Org. Lett.* **21**, 7380–7385 (2019).
3. Magné, V. & Ball, L. T. Synthesis of air-stable, odorless thiophenol surrogates via Ni-catalyzed C–S cross-coupling. *Chem. Eur. J.* **25**, 8903–8910 (2019).
4. Wang, J., Li, R., Dong, Z., Liu, P. & Dong, G. Complementary site-selectivity in arene functionalization enabled by overcoming the ortho constraint in palladium/norbornene catalysis. *Nat. Chem.* **10**, 866–872 (2018).
5. Gong, L. et al. Ni-catalyzed Suzuki–Miyaura cross-coupling of  $\alpha$ -oxo-vinylsulfones to prepare C-aryl glycals and acyclic vinyl ethers. *J. Am. Chem. Soc.* **141**, 7680–7686 (2019).
6. Lee, G. S., Kim, D. & Hong, S. H. Pd-catalyzed formal Mizoroki–Heck coupling of unactivated alkyl chlorides. *Nat. Commun.* **12**, 991 (2021).
7. Miller, D. K. Facile conversion of chromane-6-triflate to chromane-6-alanines under palladium conditions. *Tetrahedron Lett.* **54**, 811–813 (2013).
8. Ji, X. et al. Marine-natural-product development: first discovery of nortopsentin alkaloids as novel antiviral, anti-phytopathogenic-fungus, and insecticidal agents. *J. Agric. Food Chem.* **66**, 4062–4072 (2018).
9. Konstantinidou, M. et al. Rapid discovery of aspartyl protease inhibitors using an anchoring approach. *ChemMedChem* **15**, 680–684 (2020).
10. Li, Y., Chao, A. & Fleming, F. F. Isonitrile alkylations: a rapid route to imidazo[1,5-a]pyridines. *Chem. Commun.* **52**, 2111–2113 (2016).
11. Tong, Q. et al. Toward the generation of 2-amino-3-formyl difunctionalized chromones via Pd-enabled rearrangement strategy. *ACS Catal.* **13**, 12692–12699 (2023).
12. Nicolle, S. M., Hayes, C. J. & Moody, C. J. Alkyl halide-free heteroatom alkylation and epoxidation facilitated by a recyclable polymer-supported oxidant for the in-flow preparation of diazo compounds. *Chem. Eur. J.* **21**, 4576–4579 (2015).

13. Berti, F. et al. Albumin-directed stereoselective reduction of 1,3-diketones and  $\beta$ -hydroxyketones to *antidiols*. *Org. Biomol. Chem.* **9**, 1987–1999 (2011).
14. Mou, X.-Q. et al. Photoredox-catalyzed intramolecular oxy- and aminoacylation of alkenes with acyl oxime esters: facile synthesis of acylated saturated heterocycles. *Org. Chem. Front.* **11**, 74–82 (2024).
15. Zhang, Y.-C., Zhang, B.-W., Geng, R.-L. & Song, J. Enantioselective [3 + 2] cycloaddition reaction of ethynylethylene carbonates with malononitrile enabled by organo/metal cooperative catalysis. *Org. Lett.* **20**, 7907–7911 (2018).
16. Wang, X. et al. Palladium-catalyzed synthesis of 5-amino-1,2,4-oxadiazoles via isocyanide insertion. *Org. Biomol. Chem.* **18**, 4936–4940 (2020).
17. Rovira, M. et al. Orthogonal discrimination among functional groups in ullmann-type C–O and C–N couplings. *J. Org. Chem.* **81**, 7315–7325 (2016).
18. Dong, Y.-Q., Wang, K. & Zhuo, C.-X. Molybdenum-catalyzed intermolecular deoxygenative cross-coupling reactions of 1,2-diketones with  $\alpha$ -ketoamides. *ACS Catal.* **12**, 11428–11435 (2022).
19. Adly, O. M. I., Taha, A. & Fahmy, S. A. Synthesis, characterization of binary and ternary copper(ii)-semicarbazone complexes: solvatochromic shift, dipole moments and TD-DFT calculations. *J. Mol. Struct.* **1186**, 362–376 (2019).
20. Chen, W.-B. et al. Organocatalytic direct asymmetric aldol reactions of 3-isothiocyanato oxindoles to ketones: stereocontrolled synthesis of spirooxindoles bearing highly congested contiguous tetrasubstituted stereocenters. *Org. Lett.* **13**, 2472–2475 (2011).
21. Anatol, J. & MedÈTe, A. A new general procedure for the preparation of  $\alpha$ -oxocarboxylic acids. *Synthesis* **1971**, 538–539 (1971).
22. Kitamura, M., Lee, D., Hayashi, S., Tanaka, S. & Yoshimura, M. Catalytic Leuckart–Wallach-Type reductive amination of ketones. *J. Org. Chem.* **67**, 8685–8687 (2002).
23. Perego, L. A., Fleurat-Lessard, P., El Kaïm, L., Ciofini, I. & Grimaud, L. Multiple roles of isocyanides in palladium-catalyzed imidoylative couplings: a mechanistic study.

- Chem. Eur. J.* **22**, 15491–15500 (2016).
24. Seo, H., Katcher, M. H. & Jamison, T. F. Photoredox activation of carbon dioxide for amino acid synthesis in continuous flow. *Nat. Chem.* **9**, 453–456 (2017).
25. Chowdhury, D., Ghosh, S., Reddy, K.S.S.V. P., Yamijala, S. S.R.K.C. & Baidya, M. Cobalt(III)-catalyzed free-amine-directed site-selective allylation in 2-aminobiaryls with vinyl cyclopropanes. *ACS Catal.* **13**, 12543–12552 (2023).
26. Shen, J. et al. Quaternary stereocenters via catalytic enantioconvergent allylation of epoxides. *J. Am. Chem. Soc.* **145**, 21122–21131 (2023).
27. Li, F. et al. Palladium-catalyzed domino reaction for the assembly of norbornane-containing chromones with dimethyl squarate as the solid C1 source. *Org. Lett.* **24**, 9392–9397 (2022).
28. Tong, H.-R. et al. Pd(0)-catalyzed bidentate auxiliary directed enantioselective benzylic C–H Arylation of 3-Arylpropanamides Using the BINOL phosphoramidite ligand. *ACS Catal.* **8**, 11502–11512 (2018).
